# Supplementary material for: A broadly cross-reactive i-body to AMA1 potently inhibits blood and liver stages of Plasmodium parasites
Source: Research Square preprint supplement (doi:10.21203/rs.3.rs-3671797/v1), 2023-12-18
Supplement: Supplementary file 1 [file bc58e85d72430bd9f1c58b6a.pdf]

## Extended Data and Tables

Figure 1: 3D7 recAMA1 based pooled phage ELISA against other AMA1 isoforms of *P. falciparum*.

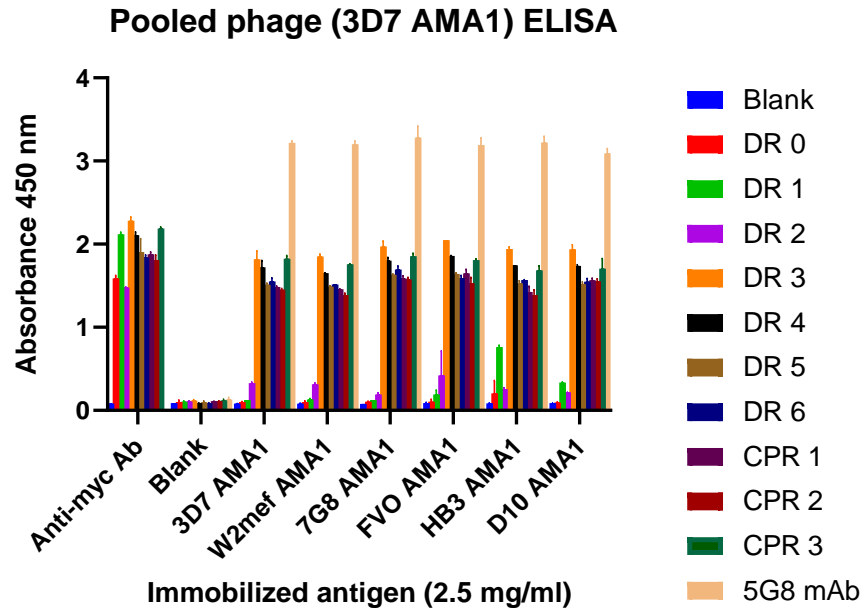

Figure 2: W2mef recAMA1 based pooled phage ELISA against other AMA1 isoforms of *P. falciparum*.

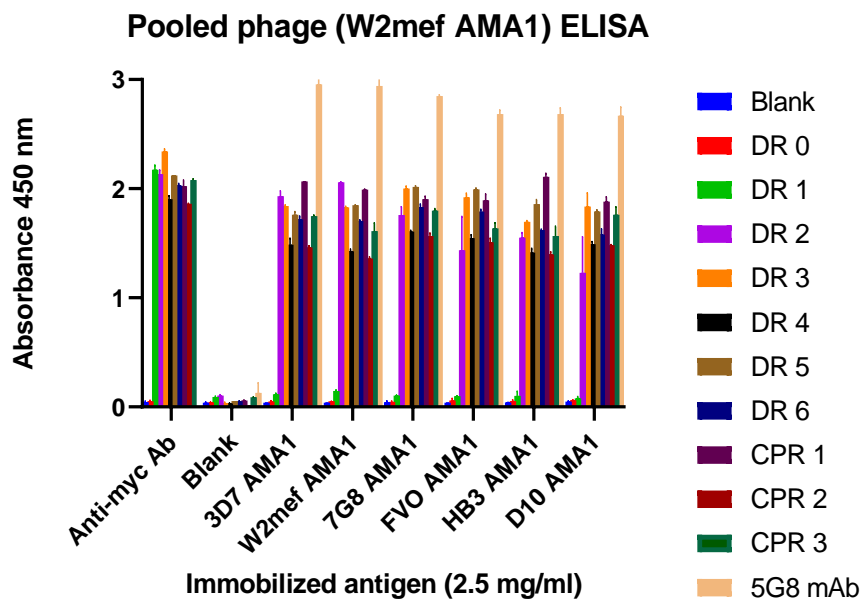

**Figure 3: Analysis of the sequence representation of each i-body sequence over each panning campaign.**

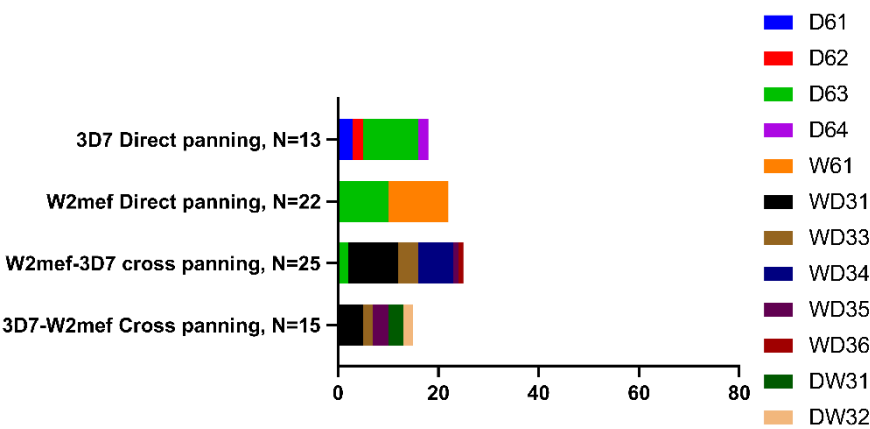

**Figure 4: Immunoblotting of saponin lysed late-stage *Pf* schizonts with 1F9 mAb.**

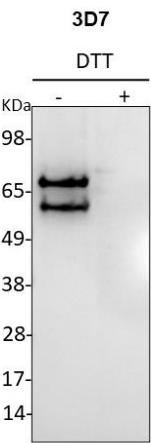

**Figure 5: Immunoblotting of saponin lysed late-stage *Pf* schizonts with 4G2 mAb.**

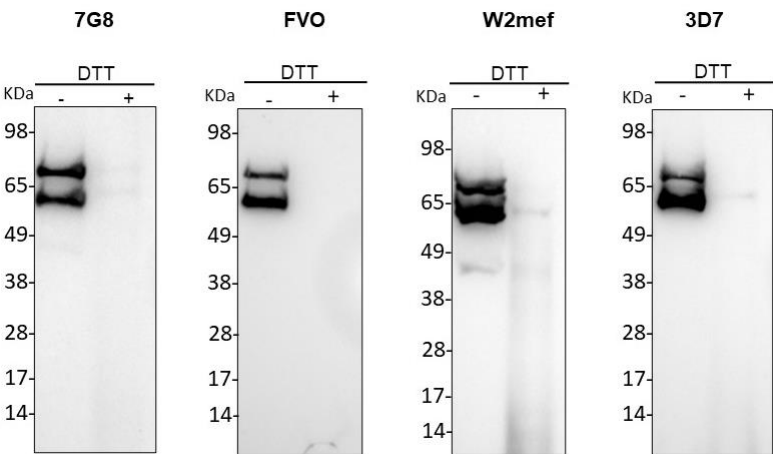

**Figure 6: WD34 footprint compared to AMA1-specific IgNAR footprint.** The Olive colour represents the IgNAR footprint. The red colour represents the highly polymorphic residues associated with the 1D loop. Purple colour represents the WD34 footprint. Overlapping residues of IgNAR footprint with polymorphic residues in the 1D loop are represented by the orange colour, and the light pink colour represents the shared residues between IgNAR and WD34 footprint.

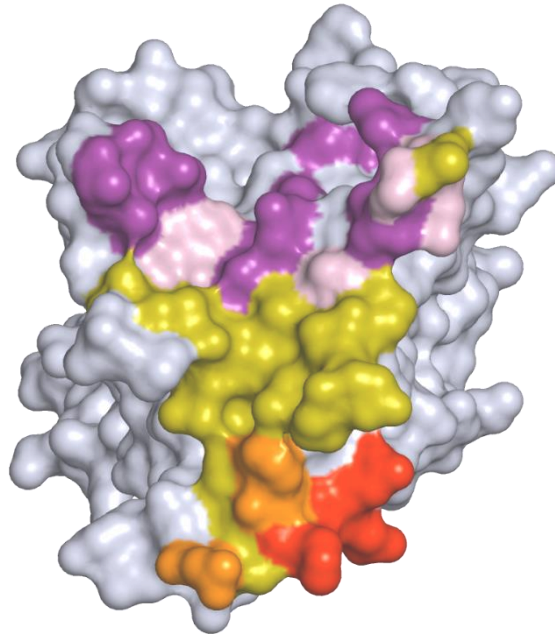

**Figure 7: WD34 footprint compared to 1F9 footprint.** The pale green colour represents the 1F9 mAb footprint. Purple colour represents the WD34 footprint. Overlapping residues of 1F9 mAb footprint with polymorphic residues in the 1D loop are represented by the salmon colour, and the grey colour represents the shared residues between 1F9 mAb and WD34 footprint.

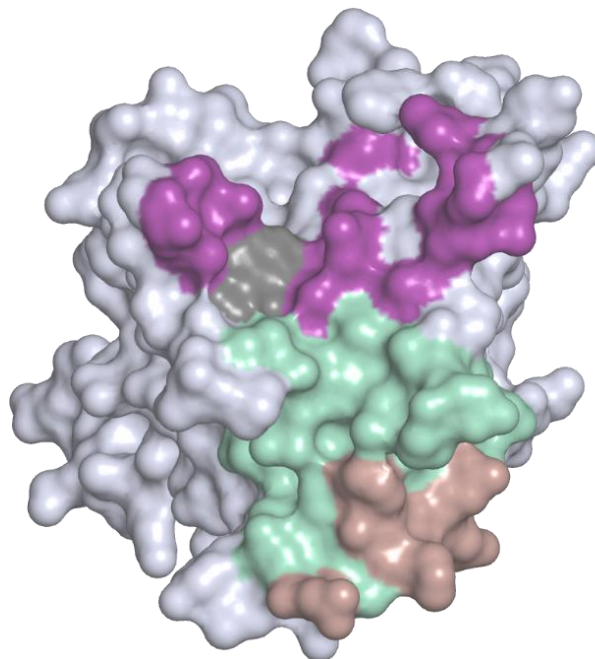

**Figure 8: WD34 scaffold involvement in *Pf*AMA1(a) and *Pv*AMA1(b) binding.**

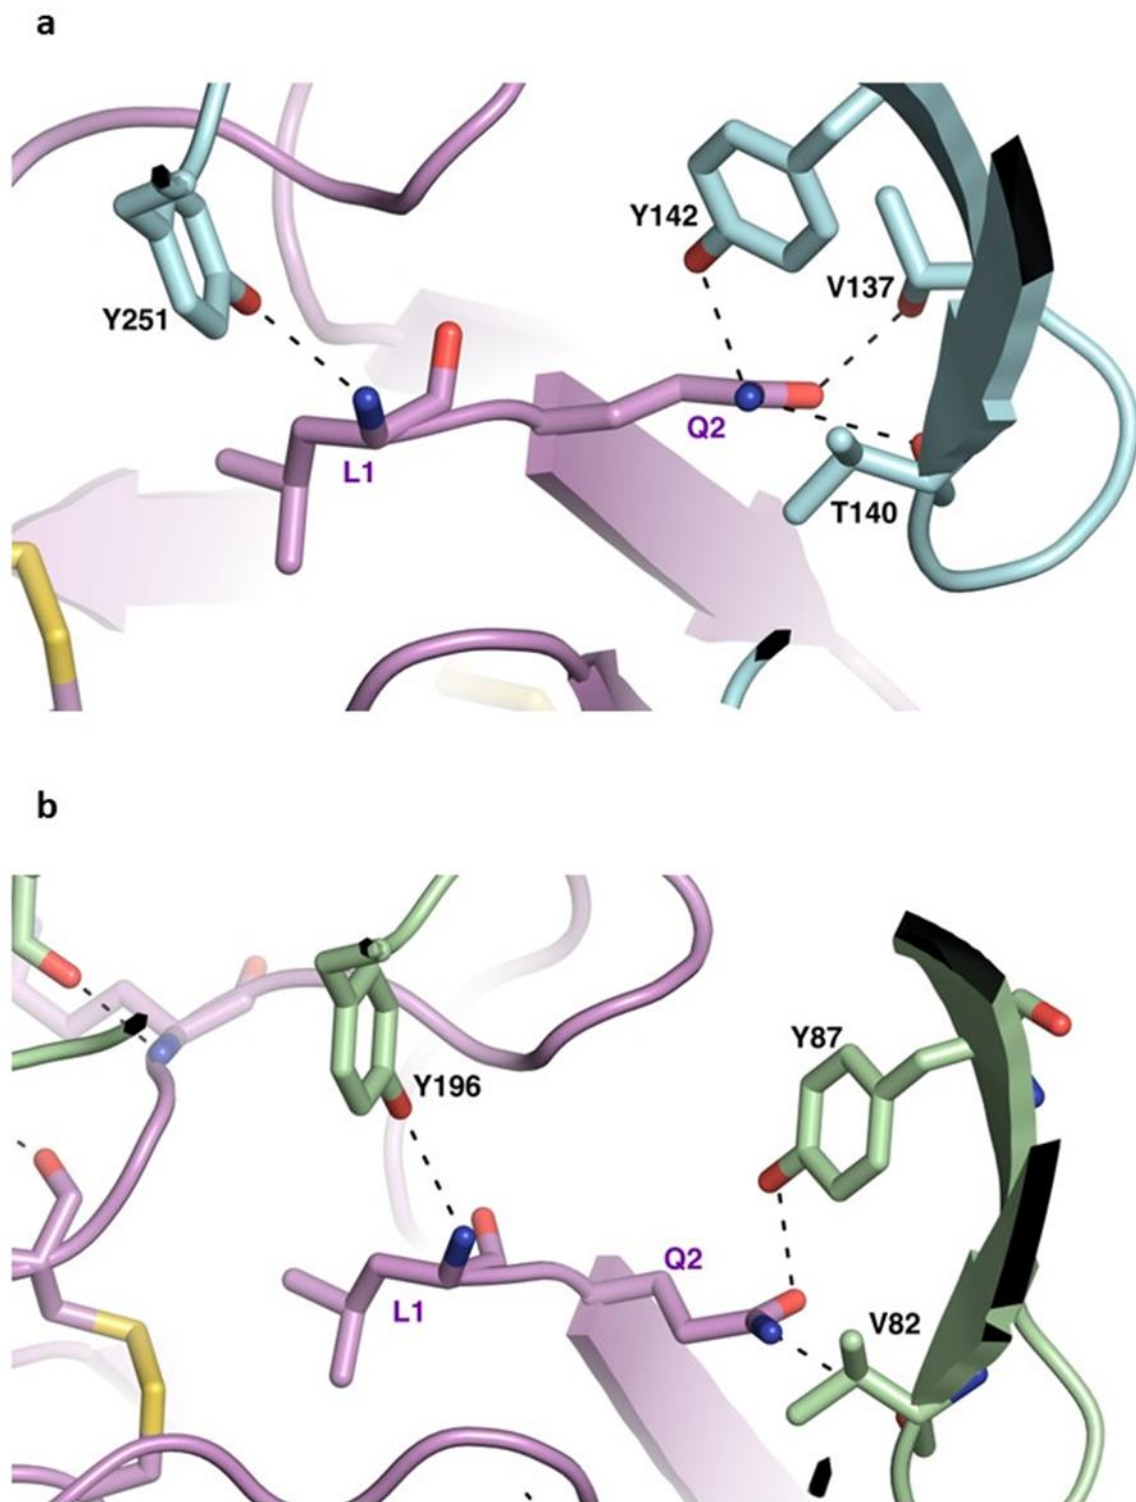

Figure 9: Pi-Pi interaction between Y236<sup>PfAMA1</sup> and W88<sup>WD34</sup>.

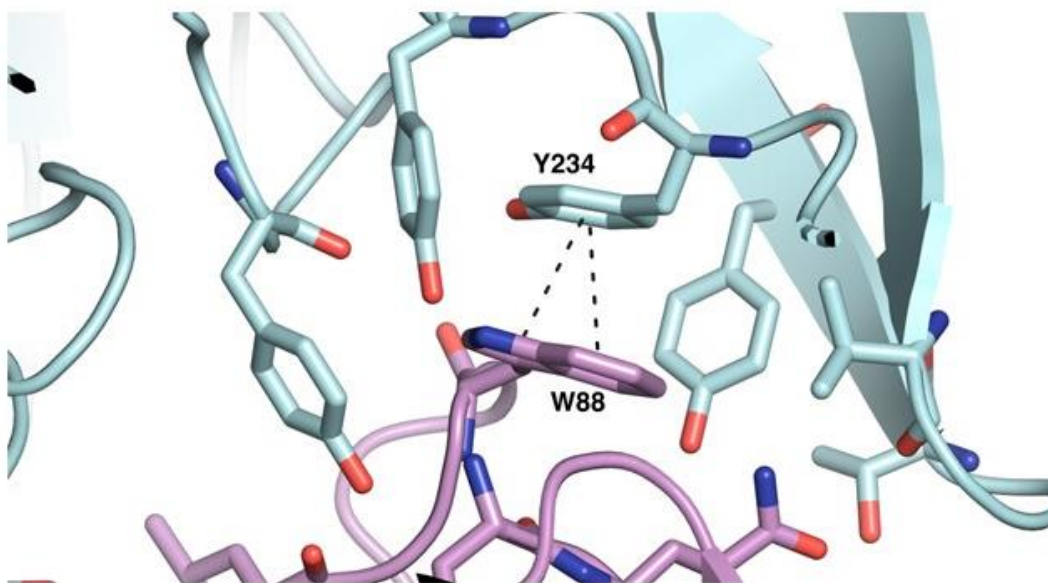

Figure 10: FoldX position scan data.

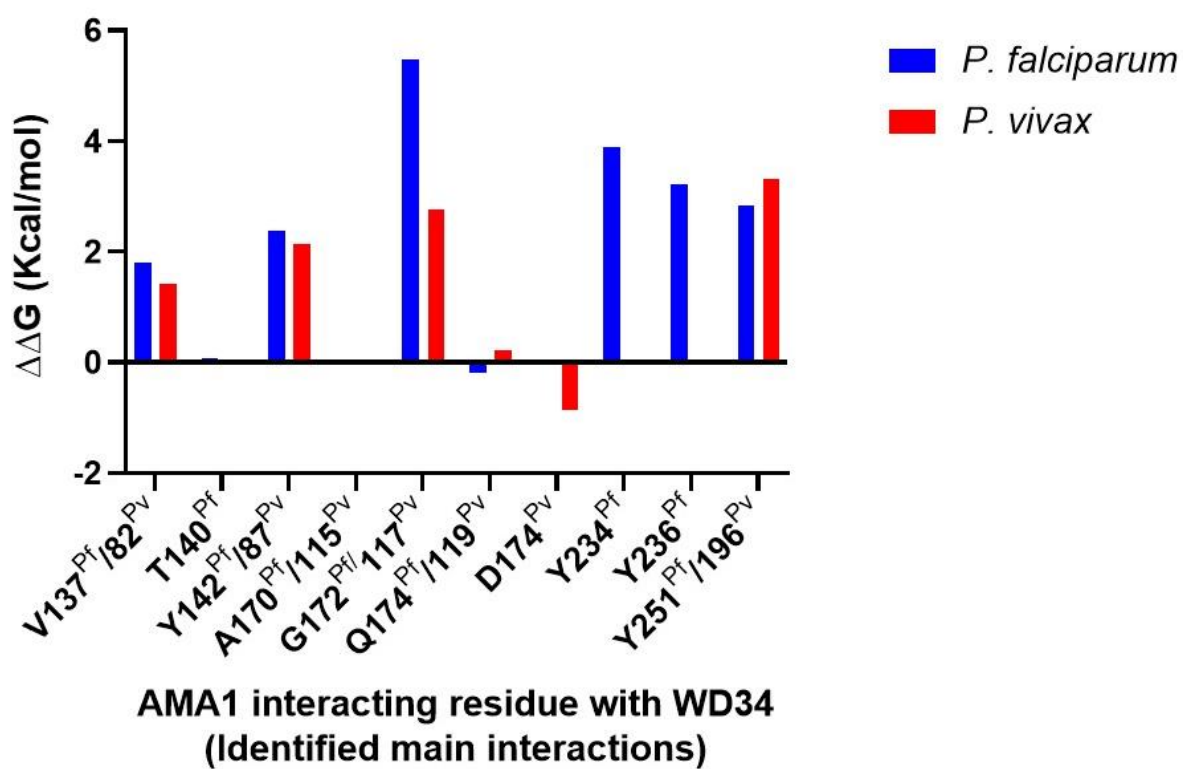

**Figure 11: WD34 footprint in relation to hydrophobic groove and surrounding loops in *Pf*AMA1.** Stereo view of Hydrophobic groove residues shown in green. Ia, Ib, Ic and Ie loops are shown in blue, and the highly polymorphic Id loop is shown in red. Residues of the WD34 footprint are shown in purple.

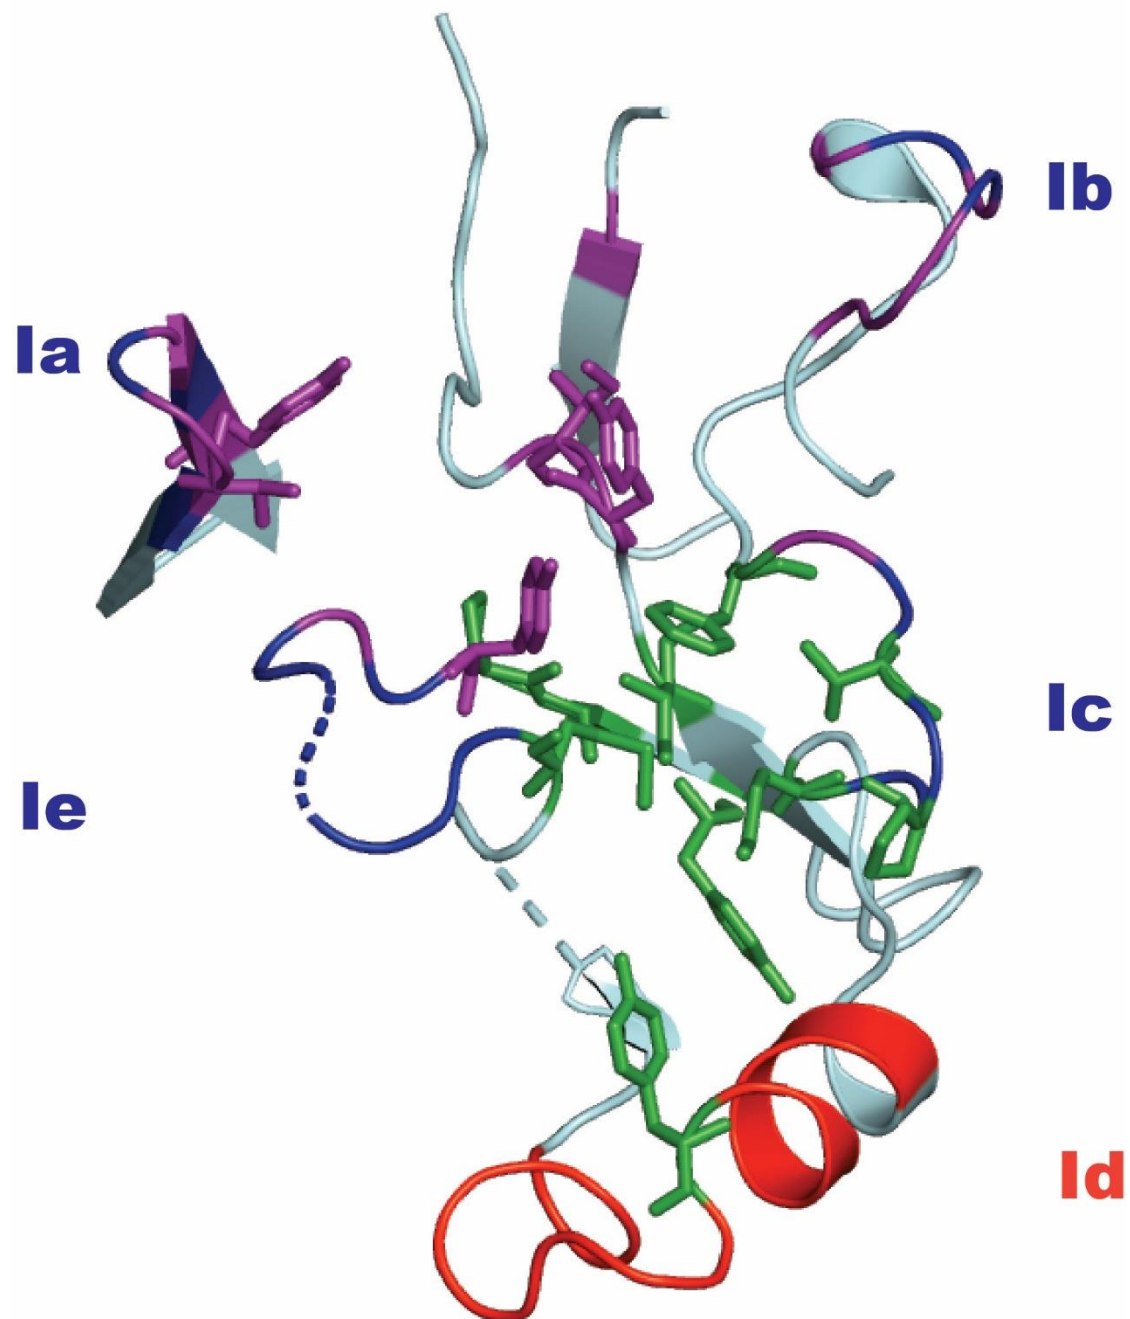



**Figure 12: Conservation of AMA1 polar interacting residues among multiple *Plasmodium* species.** 1745 *Plasmodium* parasite isolates were analysed. Detailed analysis is presented in the Extended Data sheet 1. Residues greater than 95% coverage are described as being conserved.

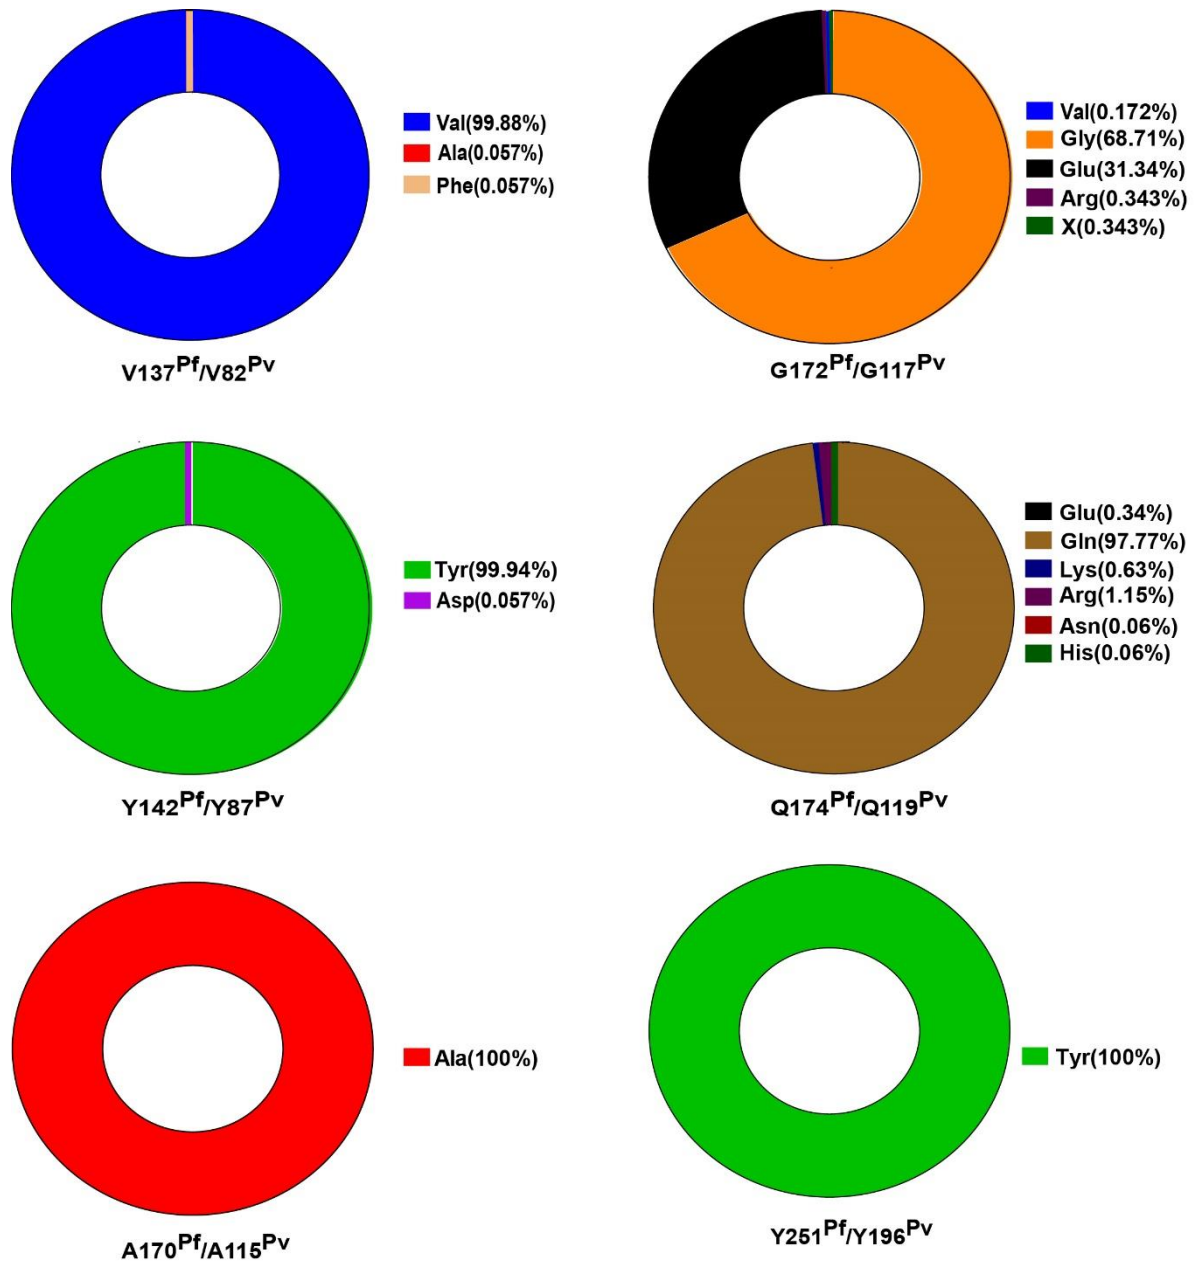

**Table 1: Extended SPR Data.**

| <b>Ligand</b> | <b>Analyte</b> | <b>K<sub>a</sub></b>           | <b>K<sub>d</sub></b>             | <b>KD</b>                        | <b>R<sub>max</sub></b> |
|---------------|----------------|--------------------------------|----------------------------------|----------------------------------|------------------------|
| 7G8 AMA1      | WD34           | $5.10 \times 10^5 (\pm 4.88)$  | $1.201 \times 10^{-4} (\pm 1.2)$ | $1.07 \times 10^{-9} (\pm 0.78)$ | 68.9 ( $\pm 4.38$ )    |
| HB3 AMA1      | WD34           | $1.19 \times 10^5 (\pm 0.35)$  | $2.22 \times 10^{-3} (\pm 0.33)$ | $1.97 \times 10^{-8} (\pm 0.79)$ | 87.3 ( $\pm 22.41$ )   |
| D10 AMA1      | WD34           | $3.43 \times 10^5 (\pm 2.31)$  | $9.88 \times 10^{-4} (\pm 4.1)$  | $3.78 \times 10^{-9} (\pm 2.01)$ | 85.8 ( $\pm 22.35$ )   |
| FVO AMA1      | WD34           | $8.79 \times 10^4 (\pm 0.92)$  | $1.74 \times 10^{-4} (\pm 0.43)$ | $1.96 \times 10^{-9} (\pm 0.30)$ | 50.6 ( $\pm 4.01$ )    |
| W2mef AMA1    | WD34           | $1.58 \times 10^6 (\pm 2.194)$ | $1.48 \times 10^{-3} (\pm 1.70)$ | $4.9 \times 10^{-9} (\pm 5.71)$  | 99.3 ( $\pm 51$ )      |
| 3D7 AMA1      | WD34           | $8.76 \times 10^4 (\pm 7.04)$  | $4.71 \times 10^{-4} (\pm 1.18)$ | $7.16 \times 10^{-9} (\pm 3.54)$ | 83.5 ( $\pm 12.98$ )   |
| Pv AMA1       | WD34           | $1.54 \times 10^4 (\pm 0.53)$  | $1.67 \times 10^{-2} (\pm 0.24)$ | $1.19 \times 10^{-7} (\pm 0.37)$ | 72.1 ( $\pm 52.6$ )    |
| Pc AMA1       | WD34           | $5.38 \times 10^4 (\pm 1.4)$   | $1.14 \times 10^{-3} (\pm 0.13)$ | $2.61 \times 10^{-8} (\pm 0.4)$  | 58.6 ( $\pm 4.7$ )     |
| 7G8 AMA1      | WD33           | $3.35 \times 10^6 (\pm 4.88)$  | $7.07 \times 10^{-2} (\pm 0.61)$ | $2.13 \times 10^{-8} (\pm 0.18)$ | 277 ( $\pm 27.73$ )    |
| HB3 AMA1      | WD33           | $3.47 \times 10^6 (\pm 0.40)$  | $6.39 \times 10^{-2} (\pm 0.02)$ | $1.86 \times 10^{-8} (\pm 0.22)$ | 242 ( $\pm 6.43$ )     |
| D10 AMA1      | WD33           | $3.76 \times 10^6 (\pm 0.56)$  | $6.10 \times 10^{-2} (\pm 0.14)$ | $1.64 \times 10^{-8} (\pm 0.20)$ | 273 ( $\pm 6.64$ )     |
| FVO AMA1      | WD33           | $3.27 \times 10^6 (\pm 0.29)$  | $3.72 \times 10^{-2} (\pm 0.05)$ | $1.14 \times 10^{-8} (\pm 0.16)$ | 196 ( $\pm 4.3$ )      |
| W2mef AMA1    | WD33           | $3.15 \times 10^6 (\pm 0.33)$  | $5.26 \times 10^{-2} (\pm 0.02)$ | $1.68 \times 10^{-8} (\pm 0.16)$ | 233 ( $\pm 4.65$ )     |
| 3D7 AMA1      | WD33           | $4.02 \times 10^6 (\pm 0.37)$  | $7.74 \times 10^{-2} (\pm 0.53)$ | $1.93 \times 10^{-8} (\pm 0.14)$ | 193 ( $\pm 9.6$ )      |
| 7G8 AMA1      | RON2 pept      | $2.2 \times 10^5 (\pm 0.19)$   | $1.13 \times 10^{-3} (\pm 0.04)$ | $5.16 \times 10^{-9} (\pm 0.65)$ | 94.7 ( $\pm 4.5$ )     |
| HB3 AMA1      | RON2 pept      | $1.89 \times 10^5 (\pm 0.18)$  | $1.41 \times 10^{-3} (\pm 0.06)$ | $7.54 \times 10^{-9} (\pm 1.07)$ | 76.2 ( $\pm 4.2$ )     |
| D10 AMA1      | RON2 pept      | $4.78 \times 10^5 (\pm 0.25)$  | $7.59 \times 10^{-3} (\pm 0.23)$ | $15.9 \times 10^{-9} (\pm 1.33)$ | 64.5 ( $\pm 2.8$ )     |
| FVO AMA1      | RON2 pept      | $1.41 \times 10^5 (\pm 0.53)$  | $8.77 \times 10^{-4} (\pm 0.26)$ | $6.31 \times 10^{-9} (\pm 0.48)$ | 60.4 ( $\pm 0.20$ )    |
| W2mef AMA1    | RON2 pept      | $1.23 \times 10^5 (\pm 0.53)$  | $1.46 \times 10^{-3} (\pm 0.41)$ | $1.23 \times 10^{-8} (\pm 0.19)$ | 48.1 ( $\pm 4.42$ )    |
| 3D7 AMA1      | RON2 pept      | $3.83 \times 10^5 (\pm 1.66)$  | $8.20 \times 10^{-3} (\pm 2.1)$  | $2.23 \times 10^{-8} (\pm 0.39)$ | 36.6 ( $\pm 0.89$ )    |



**Table 2: IX-ray data collection and refinement statistics for WD34:AMA1<sup>Pv</sup> and WD34:AMA1<sup>Pf</sup> complex.** Values in parentheses are for the highest resolution shell.

|                                                        | WD34:AMA1 <sup>Pv</sup>  | WD34:AMA1 <sup>Pf</sup> |
|--------------------------------------------------------|--------------------------|-------------------------|
| <b>Data collection</b>                                 |                          |                         |
| Space group                                            | P 21 21 21               | I 1 2 1                 |
| Cell dimensions                                        |                          |                         |
| <i>a</i> , <i>b</i> , <i>c</i> (Å)                     | 44.39 55.27 229.55       | 71.65 38.46 227.35      |
| $\alpha$ , $\beta$ , $\gamma$ (°)                      | 90.00 90.00 90.00        | 90.00 90.18 90.00       |
| Wavelength (Å)                                         | 0.9537                   | 0.9537                  |
| Resolution (Å)*                                        | 45.90-3.00 (3.18-3.00)   | 38.45-2.60 (2.72-2.60)  |
| <i>R</i> <sub>sym</sub> or <i>R</i> <sub>merge</sub> * | 0.130 (0.868)            | 0.104 (0.401)           |
| <i>I</i> / $\sigma$ <i>I</i> *                         | 4.6 (1.2)                | 9.7 (3.0)               |
| CC (1/2)                                               | 0.995 (0.829)            | 0.994 (0.900)           |
| Completeness (%) *                                     | 97.8 (99.0)              | 100.0 (100.0)           |
| Redundancy*                                            | 4.4 (4.4)                | 4.8 (4.9)               |
| <b>Refinement</b>                                      |                          |                         |
| Resolution (Å)                                         | 44.8-3.001 (3.108-3.001) | 38.45-2.6 (2.693-2.6)   |
| No. reflections                                        | 11612 (1126)             | 19608 (1949)            |
| <i>R</i> <sub>work</sub> / <i>R</i> <sub>free</sub>    | 0.2657/ 0.2982           | 0.2021/0.2323           |
| No. non-hydrogen atoms                                 | 3426                     | 3033                    |
| Protein                                                | 3426                     | 2934                    |
| Ligand/ion                                             | -                        | 56                      |
| Water                                                  | -                        | 74                      |
| <i>B</i> -factors                                      |                          |                         |
| Protein                                                | 87.93                    | 54.20                   |
| Ligand/ion                                             | -                        | 53.25                   |
| Water                                                  | -                        | 34.60                   |
| R.m.s. deviations                                      |                          |                         |
| Bond lengths (Å)                                       | 0.002                    | 0.003                   |
| Bond angles (°)                                        | 0.43                     | 0.62                    |
| Ramachandran plot (%)                                  |                          |                         |
| Favored                                                | 93.59                    | 95.89                   |
| Allowed                                                | 6.41                     | 4.11                    |
| Disallowed                                             | 0.00                     | 0.00                    |

**Table 3: Structure-based interactions between AMA1 and WD34.**

| WD34               |          | AMA1 ( <i>falciparum</i> )                                           | AMA1 ( <i>vivax</i> )      |
|--------------------|----------|----------------------------------------------------------------------|----------------------------|
| Res: number        | Region   |                                                                      |                            |
| Vander Waals bonds |          |                                                                      |                            |
| D4                 | Scaffold | A138, T140                                                           |                            |
| Q2                 | Scaffold | V137, A138                                                           | A85 (H)                    |
| A25                | Scaffold |                                                                      | D174                       |
| G26                | Scaffold |                                                                      | D174                       |
| M27                | CDR1     |                                                                      | M171                       |
| L28                | CDR1     | P184                                                                 | F128, P129                 |
| G80                | CDR3     | G172                                                                 | G117                       |
| P81                | CDR3     | T171, G172                                                           | T116, G117                 |
| Q82                | CDR3     | T171                                                                 | T116, P129                 |
| C83                | CDR3     | T171, G172                                                           | A115, T116                 |
| P84                | CDR3     | A170, T171, Y251                                                     | P129, Y196                 |
| R85                | CDR3     | L176                                                                 | G117, L121                 |
| T87                | CDR3     | Y251, I252                                                           | Y196, L197                 |
| W88                | CDR3     | V137, Y234                                                           | Y87, Y179, Y196            |
| S89                | CDR3     | Y142                                                                 |                            |
| L90                | CDR3     | I252, F276                                                           | L197, A199, N202, F221     |
|                    |          |                                                                      |                            |
| Polar Interactions |          |                                                                      |                            |
| L1                 | Scaffold | Y251(2.86 Å)                                                         | Y196(3.14 Å)               |
| Q2                 | Scaffold | V137(3.36 Å), T140(2.51 Å), Y142(2.71 Å)                             | V82(3.36 Å), Y87(2.78 Å)   |
| G80                | CDR3     | G172(3.2 Å)                                                          |                            |
| C83                | CDR3     | G172(3.27 Å)                                                         | G117(3.26 Å)               |
| R85                | CDR3     | A170(2.83 Å), Q174(2.66 Å)                                           | A115(2.97 Å), Q119(2.48 Å) |
| L86                | CDR3     | Y251(2.67 Å)                                                         | Y196(2.51 Å)               |
| W88                | CDR3     | Y236(2.82 Å)                                                         |                            |
| G26                | Scaffold |                                                                      | D174(3.22 Å)               |
|                    |          | One Pi-Pi stack Y234 <sup>falci</sup> . W88 <sup>WD34</sup> (3.83 Å) | No pi-pi interactions      |
|                    |          |                                                                      |                            |
