# Supplementary material for: A broadly cross-reactive i-body to AMA1 potently inhibits blood and liver stages of Plasmodium parasites
Source: Research Square preprint supplement (doi:10.21203/rs.3.rs-3671797/v1), 2023-12-18
Supplement: Supplementary file 1 [file d6134e7e1f6095c0bc96d762.xlsx]

## Sheet: NCBI Entries
RID: JY63AHPD013
Job Title:Protein Sequence
Program: BLASTP
Query: unnamed protein product ID: lcl|Query_82847(amino acid) Len	gth: 151
Database: nr All non-redundant GenBank CDS translations+PDB+SwissProt+PIR+PRF excluding environmental samples from WGS projects
Sequences producing significant alignments:
	Scientific	Common		Max	Total	Query	E	Per.	Acc.
Description	Name	Name	Taxid	Score	Score	cover	Value	Ident	Len	Accession
apical membrane antigen 1 [Plasmodium falciparum]	Plasmodium f...	malaria para...	5833	318	318	1	1e-111	100	192	CAD35543.1
apical membrane antigen 1 [Plasmodium falciparum]	Plasmodium f...	malaria para...	5833	317	317	1	3e-111	99.34	210	AMP83631.1
apical membrane antigen-1 [Plasmodium falciparum]	Plasmodium f...	malaria para...	5833	320	320	1	1e-110	100	310	AAC47110.1
Chain A, Apical Membrane Antigen 1, Ama1 [Plasmodium falciparu...	Plasmodium f...	NA	36329	320	320	1	3e-110	100	347	3ZWZ_A
Chain A, apical membrane antigen 1 precursor [Plasmodium...	Plasmodium f...	NA	36329	319	319	1	3e-110	100	336	1Z40_A
Chain A, Apical membrane antigen 1 [Plasmodium falciparum 3D7]	Plasmodium f...	NA	36329	319	319	1	3e-110	100	335	2Z8V_A
Chain A, Apical membrane antigen 1, AMA1 [Plasmodium falciparu...	Plasmodium f...	NA	36329	318	318	1	3e-109	99.34	381	3SRJ_A
Chain A, Apical membrane antigen 1, rhoptry neck protein 2...	Plasmodium f...	NA	36329	318	318	1	3e-109	99.34	377	8GID_A
apical membrane antigen 1 [Plasmodium falciparum]	Plasmodium f...	malaria para...	5833	320	320	1	3e-108	100	519	AHI17052.1
apical membrane antigen 1 [Plasmodium falciparum]	Plasmodium f...	malaria para...	5833	320	320	1	3e-108	100	520	AFM28645.1
apical membrane antigen 1 [Plasmodium falciparum]	Plasmodium f...	malaria para...	5833	320	320	1	3e-108	100	520	AFM28669.1
apical membrane antigen 1 [Plasmodium falciparum]	Plasmodium f...	malaria para...	5833	320	320	1	3e-108	100	520	AFM28588.1
apical membrane antigen 1 [Plasmodium falciparum]	Plasmodium f...	malaria para...	5833	320	320	1	3e-108	100	520	AFM28740.1
apical membrane antigen 1 [Plasmodium falciparum]	Plasmodium f...	malaria para...	5833	320	320	1	4e-108	100	519	AHI16983.1
apical membrane antigen 1 [Plasmodium falciparum]	Plasmodium f...	malaria para...	5833	320	320	1	4e-108	100	520	AFM28573.1
apical membrane antigen 1 [Plasmodium falciparum]	Plasmodium f...	malaria para...	5833	320	320	1	4e-108	100	520	AFM28917.1
apical membrane antigen 1 [Plasmodium falciparum]	Plasmodium f...	malaria para...	5833	320	320	1	4e-108	100	520	AFM28681.1
apical membrane antigen 1 [Plasmodium falciparum]	Plasmodium f...	malaria para...	5833	320	320	1	4e-108	100	520	AFM28732.1
apical membrane antigen 1 [Plasmodium falciparum]	Plasmodium f...	malaria para...	5833	320	320	1	4e-108	100	520	AFM28610.1
apical membrane antigen 1 [Plasmodium falciparum]	Plasmodium f...	malaria para...	5833	320	320	1	4e-108	100	520	AFM28825.1
apical membrane antigen 1 [Plasmodium falciparum]	Plasmodium f...	malaria para...	5833	320	320	1	4e-108	100	520	AFM28666.1
apical membrane antigen 1 [Plasmodium falciparum]	Plasmodium f...	malaria para...	5833	320	320	1	4e-108	100	520	AFM28531.1
apical membrane antigen 1 [Plasmodium falciparum]	Plasmodium f...	malaria para...	5833	320	320	1	4e-108	100	520	AFM28661.1
apical membrane antigen 1 [Plasmodium falciparum]	Plasmodium f...	malaria para...	5833	320	320	1	4e-108	100	520	AFM28912.1
apical membrane antigen 1 [Plasmodium falciparum]	Plasmodium f...	malaria para...	5833	320	320	1	4e-108	100	526	CAB97202.1
apical membrane antigen 1 [Plasmodium falciparum]	Plasmodium f...	malaria para...	5833	308	308	1	4e-108	97.35	192	CAD35523.1
apical membrane antigen 1 [Plasmodium falciparum]	Plasmodium f...	malaria para...	5833	320	320	1	4e-108	100	520	AFM28965.1
apical membrane antigen 1 [Plasmodium falciparum]	Plasmodium f...	malaria para...	5833	309	309	1	5e-108	97.35	210	AMP83642.1
apical membrane antigen 1 [Plasmodium falciparum]	Plasmodium f...	malaria para...	5833	320	320	1	6e-108	100	520	AFM28547.1
apical membrane antigen-1 [Plasmodium falciparum]	Plasmodium f...	malaria para...	5833	322	322	1	6e-108	100	580	AIR08603.1
apical membrane antigen 1 [Plasmodium falciparum]	Plasmodium f...	malaria para...	5833	310	310	1	6e-108	97.35	242	AMX81242.1
apical membrane antigen 1 [Plasmodium falciparum]	Plasmodium f...	malaria para...	5833	310	310	1	6e-108	97.35	242	AMX81240.1
apical membrane antigen 1 [Plasmodium falciparum]	Plasmodium f...	malaria para...	5833	308	308	1	7e-108	97.35	210	AMP83758.1
apical membrane antigen-1 [Plasmodium falciparum]	Plasmodium f...	malaria para...	5833	321	321	1	8e-108	100	580	AIR08604.1
apical membrane antigen 1 [Plasmodium falciparum]	Plasmodium f...	malaria para...	5833	308	308	1	8e-108	97.35	192	CAD35554.1
apical membrane antigen 1 [Plasmodium falciparum]	Plasmodium f...	malaria para...	5833	321	321	1	9e-108	100	578	ACA24148.1
apical membrane antigen 1 [Plasmodium falciparum]	Plasmodium f...	malaria para...	5833	322	322	1	1e-107	100	594	ACR49699.1
apical membrane antigen 1 [Plasmodium falciparum]	Plasmodium f...	malaria para...	5833	321	321	1	1e-107	100	594	ACR49673.1
apical membrane antigen 1 [Plasmodium falciparum]	Plasmodium f...	malaria para...	5833	321	321	1	1e-107	100	594	ACR49754.1
apical membrane antigen 1 [Plasmodium falciparum]	Plasmodium f...	malaria para...	5833	321	321	1	1e-107	100	594	ACR49683.1
apical membrane antigen 1 [Plasmodium falciparum]	Plasmodium f...	malaria para...	5833	321	321	1	1e-107	100	594	ACR49680.1
apical membrane antigen 1 [Plasmodium falciparum]	Plasmodium f...	malaria para...	5833	319	319	1	1e-107	99.34	520	AFM28960.1
apical membrane antigen 1 [Plasmodium falciparum]	Plasmodium f...	malaria para...	5833	307	307	1	1e-107	96.69	183	ADM31345.1
apical membrane antigen 1 [Plasmodium falciparum]	Plasmodium f...	malaria para...	5833	321	321	1	1e-107	100	594	ACR49684.1
apical membrane antigen 1 [Plasmodium falciparum]	Plasmodium f...	malaria para...	5833	321	321	1	2e-107	100	594	ACR49728.1
apical membrane antigen 1 [Plasmodium falciparum]	Plasmodium f...	malaria para...	5833	307	307	1	2e-107	96.69	192	CAD35539.1
apical membrane antigen 1 [Plasmodium falciparum]	Plasmodium f...	malaria para...	5833	321	321	1	2e-107	100	594	ACR49659.1
apical membrane antigen 1 [Plasmodium falciparum]	Plasmodium f...	malaria para...	5833	318	318	1	2e-107	99.34	520	AFM28683.1
apical membrane antigen 1 [Plasmodium falciparum]	Plasmodium f...	malaria para...	5833	321	321	1	2e-107	100	616	AXN69730.1
apical membrane antigen-1 [Plasmodium falciparum 3D7]	Plasmodium f...	NA	36329	320	320	1	2e-107	100	596	AAC47104.1
RecName: Full=Apical membrane antigen 1; AltName: Full=Merozoi...	Plasmodium f...	NA	5837	321	321	1	2e-107	100	622	P22621.1
apical membrane antigen 1 [Plasmodium falciparum]	Plasmodium f...	malaria para...	5833	321	321	1	3e-107	100	622	ACB87856.1
apical membrane antigen 1 [Plasmodium falciparum]	Plasmodium f...	malaria para...	5833	321	321	1	3e-107	100	622	ACB87843.1
apical membrane antigen 1 [Plasmodium falciparum]	Plasmodium f...	malaria para...	5833	321	321	1	3e-107	100	622	BAM85525.1
apical membrane antigen-1 [Plasmodium falciparum]	Plasmodium f...	malaria para...	5833	321	321	1	3e-107	100	622	AAG50121.1
apical membrane antigen-1 [Plasmodium falciparum]	Plasmodium f...	malaria para...	5833	321	321	1	3e-107	100	622	UIH11145.1
apical membrane antigen 1 [Plasmodium falciparum]	Plasmodium f...	malaria para...	5833	321	321	1	3e-107	100	622	BAM85651.1
apical membrane antigen 1 [Plasmodium falciparum]	Plasmodium f...	malaria para...	5833	321	321	1	3e-107	100	622	ACB87816.1
apical membrane antigen 1 [Plasmodium falciparum]	Plasmodium f...	malaria para...	5833	321	321	1	3e-107	100	622	ACB87801.1
apical membrane antigen 1 [Plasmodium falciparum]	Plasmodium f...	malaria para...	5833	321	321	1	3e-107	100	622	BAN59369.1
apical membrane antigen 1 [Plasmodium falciparum]	Plasmodium f...	malaria para...	5833	321	321	1	3e-107	100	622	ACB87810.1
apical membrane antigen 1 [Plasmodium falciparum]	Plasmodium f...	malaria para...	5833	320	320	1	4e-107	99.34	594	ACR49723.1
apical membrane antigen 1 [Plasmodium falciparum]	Plasmodium f...	malaria para...	5833	318	318	1	4e-107	99.34	526	CAB97200.1
apical membrane antigen 1 [Plasmodium falciparum]	Plasmodium f...	malaria para...	5833	311	311	1	4e-107	97.35	341	AMM75848.1
apical membrane antigen 1 [Plasmodium falciparum 3D7]	Plasmodium f...	NA	36329	320	320	1	5e-107	100	622	XP_001348015.1
apical membrane antigen 1 [Plasmodium falciparum]	Plasmodium f...	malaria para...	5833	305	305	1	5e-107	96.03	183	ADM31361.1
apical membrane antigen 1 [Plasmodium falciparum]	Plasmodium f...	malaria para...	5833	305	305	1	6e-107	96.03	188	ADM31357.1
apical membrane antigen 1 [Plasmodium falciparum]	Plasmodium f...	malaria para...	5833	304	304	1	6e-107	96.03	162	ADM31358.1
apical membrane antigen-1 [Plasmodium falciparum]	Plasmodium f...	malaria para...	5833	305	305	1	6e-107	96.03	186	ADX07102.1
apical membrane antigen 1 [Plasmodium falciparum]	Plasmodium f...	malaria para...	5833	310	310	1	1e-106	97.35	326	AMM75844.1
apical membrane antigen 1 [Plasmodium falciparum]	Plasmodium f...	malaria para...	5833	317	317	1	1e-106	99.34	520	AFM28987.1
apical membrane antigen 1 [Plasmodium falciparum]	Plasmodium f...	malaria para...	5833	318	318	1	1e-106	99.34	572	AMM75872.1
apical membrane antigen-1 [Plasmodium falciparum]	Plasmodium f...	malaria para...	5833	305	305	1	1e-106	95.36	186	ADX07099.1
apical membrane antigen 1 [Plasmodium falciparum]	Plasmodium f...	malaria para...	5833	310	310	1	2e-106	97.35	347	AMM75850.1
apical membrane antigen 1 [Plasmodium falciparum]	Plasmodium f...	malaria para...	5833	306	306	1	2e-106	96.03	242	AMX81238.1
apical membrane antigen 1 [Plasmodium falciparum]	Plasmodium f...	malaria para...	5833	306	306	1	2e-106	96.03	242	AMX81243.1
apical membrane antigen 1 [Plasmodium falciparum]	Plasmodium f...	malaria para...	5833	305	305	1	3e-106	96.69	210	AMP83610.1
apical membrane antigen 1 [Plasmodium falciparum]	Plasmodium f...	malaria para...	5833	318	318	1	3e-106	99.34	622	BAM85366.1
apical membrane antigen 1 [Plasmodium falciparum]	Plasmodium f...	malaria para...	5833	317	317	1	3e-106	99.34	578	ACA24168.1
apical membrane antigen 1 [Plasmodium falciparum]	Plasmodium f...	malaria para...	5833	315	315	1	3e-106	98.68	526	CAB97181.1
apical membrane antigen 1 [Plasmodium falciparum]	Plasmodium f...	malaria para...	5833	315	315	1	4e-106	98.01	520	AFM28736.1
apical membrane antigen 1 [Plasmodium falciparum]	Plasmodium f...	malaria para...	5833	303	303	1	4e-106	95.36	184	ADM31355.1
apical membrane antigen-1 [Plasmodium falciparum]	Plasmodium f...	malaria para...	5833	318	318	1	4e-106	99.34	622	AAG50122.1
apical membrane antigen 1 [Plasmodium falciparum]	Plasmodium f...	malaria para...	5833	303	303	1	6e-106	96.03	192	CAD35565.1
apical membrane antigen 1 [Plasmodium falciparum]	Plasmodium f...	malaria para...	5833	302	302	1	7e-106	94.7	168	ADM31341.1
apical membrane antigen 1 [Plasmodium falciparum]	Plasmodium f...	malaria para...	5833	303	303	1	7e-106	96.03	210	AMP83781.1
apical membrane antigen 1 [Plasmodium falciparum]	Plasmodium f...	malaria para...	5833	314	314	1	7e-106	98.01	519	AHI17042.1
apical membrane antigen 1 [Plasmodium falciparum]	Plasmodium f...	malaria para...	5833	316	316	1	1e-105	98.68	594	ACR49655.1
apical membrane antigen 1 [Plasmodium falciparum]	Plasmodium f...	malaria para...	5833	301	301	1	2e-105	94.04	187	ADM31340.1
apical membrane antigen 1 [Plasmodium falciparum]	Plasmodium f...	malaria para...	5833	301	301	1	3e-105	94.04	186	ADM31348.1
apical membrane antigen 1 [Plasmodium falciparum]	Plasmodium f...	malaria para...	5833	310	310	1	5e-105	97.35	450	AAZ99888.1
apical membrane antigen 1 [Plasmodium falciparum]	Plasmodium f...	malaria para...	5833	305	305	1	5e-105	96.03	323	AMM75857.1
apical membrane antigen 1 [Plasmodium falciparum]	Plasmodium f...	malaria para...	5833	301	301	1	6e-105	94.7	210	AMP83636.1
apical membrane antigen 1 [Plasmodium falciparum]	Plasmodium f...	malaria para...	5833	312	312	1	6e-105	98.01	520	AFM28579.1
apical membrane antigen 1 [Plasmodium falciparum]	Plasmodium f...	malaria para...	5833	301	301	1	7e-105	95.36	210	AMP83615.1
apical membrane antigen 1 [Plasmodium falciparum]	Plasmodium f...	malaria para...	5833	312	312	1	7e-105	98.01	520	AFM28551.1
apical membrane antigen 1 [Plasmodium falciparum]	Plasmodium f...	malaria para...	5833	315	315	1	7e-105	97.35	616	AXN69729.1
apical membrane antigen 1 [Plasmodium falciparum]	Plasmodium f...	malaria para...	5833	312	312	1	7e-105	98.01	520	AFM28663.1
apical membrane antigen 1 [Plasmodium falciparum]	Plasmodium f...	malaria para...	5833	311	311	1	8e-105	98.01	520	AFM28924.1
apical membrane antigen 1 [Plasmodium falciparum]	Plasmodium f...	malaria para...	5833	311	311	1	8e-105	98.01	520	AFM28597.1
apical membrane antigen 1 [Plasmodium falciparum]	Plasmodium f...	malaria para...	5833	300	300	1	9e-105	94.7	184	ADM31354.1
apical membrane antigen-1 [Plasmodium falciparum]	Plasmodium f...	malaria para...	5833	315	315	1	1e-104	98.01	622	AAG50119.1
apical membrane antigen-1 [Plasmodium falciparum]	Plasmodium f...	malaria para...	5833	300	300	1	1e-104	94.04	186	ADX07106.1
apical membrane antigen-1 [Plasmodium falciparum]	Plasmodium f...	malaria para...	5833	315	315	1	1e-104	98.01	622	AAG50120.1
apical membrane antigen 1 [Plasmodium falciparum]	Plasmodium f...	malaria para...	5833	314	314	1	1e-104	98.01	622	BCL11775.1
apical membrane antigen 1 [Plasmodium falciparum]	Plasmodium f...	malaria para...	5833	314	314	1	1e-104	98.68	622	BAM85398.1
apical membrane antigen 1 [Plasmodium falciparum]	Plasmodium f...	malaria para...	5833	314	314	1	1e-104	98.01	622	BAV14284.1
apical membrane antigen 1 [Plasmodium falciparum]	Plasmodium f...	malaria para...	5833	300	300	1	1e-104	95.36	192	CAD35558.1
apical membrane antigen 1 [Plasmodium falciparum]	Plasmodium f...	malaria para...	5833	314	314	1	1e-104	98.01	622	BAV14265.1
apical membrane antigen 1 [Plasmodium falciparum]	Plasmodium f...	malaria para...	5833	312	312	1	1e-104	97.35	545	AGL76297.1
apical membrane antigen 1 [Plasmodium falciparum]	Plasmodium f...	malaria para...	5833	300	300	1	1e-104	94.7	192	CAD35519.1
apical membrane antigen 1 [Plasmodium falciparum]	Plasmodium f...	malaria para...	5833	299	299	1	2e-104	94.04	179	ADM31363.1
apical membrane antigen 1 [Plasmodium falciparum]	Plasmodium f...	malaria para...	5833	312	312	1	2e-104	97.35	572	AMM75865.1
apical membrane antigen 1 [Plasmodium falciparum]	Plasmodium f...	malaria para...	5833	311	311	1	2e-104	97.35	520	AFM28900.1
apical membrane antigen 1 [Plasmodium falciparum]	Plasmodium f...	malaria para...	5833	312	312	1	2e-104	97.35	571	AMM75875.1
apical membrane antigen 1 [Plasmodium falciparum]	Plasmodium f...	malaria para...	5833	311	311	1	2e-104	97.35	520	AFM28916.1
apical membrane antigen 1 [Plasmodium falciparum]	Plasmodium f...	malaria para...	5833	311	311	1	2e-104	97.35	519	AHI17058.1
apical membrane antigen 1 [Plasmodium falciparum]	Plasmodium f...	malaria para...	5833	310	310	1	2e-104	97.35	520	AFM28708.1
apical membrane antigen-1 [Plasmodium falciparum]	Plasmodium f...	malaria para...	5833	313	313	1	2e-104	98.01	622	ANS58300.1
apical membrane antigen 1 [Plasmodium falciparum]	Plasmodium f...	malaria para...	5833	299	299	1	2e-104	94.7	192	CAD35553.1
apical membrane antigen 1 [Plasmodium falciparum]	Plasmodium f...	malaria para...	5833	310	310	1	2e-104	97.35	519	AHI16999.1
apical membrane antigen 1 [Plasmodium falciparum]	Plasmodium f...	malaria para...	5833	313	313	1	3e-104	98.01	622	BAV14290.1
Chain A, Apical membrane antigen 1, rhoptry neck protein 2...	Plasmodium f...	NA	36329	305	305	1	3e-104	96.03	372	8G6B_A
apical membrane antigen 1 [Plasmodium falciparum]	Plasmodium f...	malaria para...	5833	310	310	1	3e-104	97.35	520	AFM28532.1
apical membrane antigen 1 [Plasmodium falciparum]	Plasmodium f...	malaria para...	5833	313	313	1	4e-104	98.01	616	AXN69728.1
apical membrane antigen 1 [Plasmodium falciparum]	Plasmodium f...	malaria para...	5833	313	313	1	4e-104	97.35	622	BAM85489.1
apical membrane antigen 1 [Plasmodium falciparum]	Plasmodium f...	malaria para...	5833	312	312	1	4e-104	98.01	594	ACR49763.1
apical membrane antigen 1 [Plasmodium falciparum FCH/4]	Plasmodium f...	NA	1036724	313	313	1	4e-104	98.01	622	ETW28666.1
apical membrane antigen 1 [Plasmodium falciparum]	Plasmodium f...	malaria para...	5833	310	310	1	5e-104	97.35	526	CAB97197.1
apical membrane antigen 1 [Plasmodium falciparum]	Plasmodium f...	malaria para...	5833	313	313	1	5e-104	98.01	622	ACB87817.1
apical membrane antigen-1 [Plasmodium falciparum]	Plasmodium f...	malaria para...	5833	313	313	1	5e-104	98.01	622	ANS58281.1
apical membrane antigen 1 [Plasmodium falciparum]	Plasmodium f...	malaria para...	5833	311	311	1	5e-104	97.35	576	AMM75871.1
apical membrane antigen 1 [Plasmodium falciparum]	Plasmodium f...	malaria para...	5833	313	313	1	5e-104	98.01	622	ACB87805.1
apical membrane antigen-1 [Plasmodium falciparum]	Plasmodium f...	malaria para...	5833	298	298	1	5e-104	93.38	186	ADX07098.1
apical membrane antigen-1 [Plasmodium falciparum]	Plasmodium f...	malaria para...	5833	313	313	1	5e-104	98.01	622	ANS58291.1
apical membrane antigen 1 [Plasmodium falciparum]	Plasmodium f...	malaria para...	5833	313	313	1	5e-104	98.01	622	BAM85430.1
apical membrane antigen 1 [Plasmodium falciparum]	Plasmodium f...	malaria para...	5833	310	310	1	6e-104	97.35	520	AFM28650.1
apical membrane antigen 1 [Plasmodium falciparum]	Plasmodium f...	malaria para...	5833	310	310	1	6e-104	97.35	520	AFM28914.1
apical membrane antigen-1 [Plasmodium falciparum]	Plasmodium f...	malaria para...	5833	312	312	1	6e-104	98.01	622	ANS58296.1
apical membrane antigen 1 [Plasmodium falciparum]	Plasmodium f...	malaria para...	5833	309	309	1	7e-104	97.35	520	AFM28822.1
apical membrane antigen 1 [Plasmodium falciparum]	Plasmodium f...	malaria para...	5833	309	309	1	7e-104	96.69	519	AHI17004.1
apical membrane antigen 1 [Plasmodium falciparum]	Plasmodium f...	malaria para...	5833	312	312	1	7e-104	97.35	622	BAV14292.1
apical membrane antigen 1 [Plasmodium falciparum]	Plasmodium f...	malaria para...	5833	311	311	1	7e-104	97.35	594	ACR49761.1
apical membrane antigen 1 [Plasmodium falciparum]	Plasmodium f...	malaria para...	5833	312	312	1	7e-104	97.35	622	BCL11778.1
apical membrane antigen 1 [Plasmodium falciparum]	Plasmodium f...	malaria para...	5833	312	312	1	8e-104	97.35	622	BAV14264.1
apical membrane antigen 1 [Plasmodium falciparum]	Plasmodium f...	malaria para...	5833	298	298	1	8e-104	94.04	189	ADM31349.1
apical membrane antigen 1 [Plasmodium falciparum]	Plasmodium f...	malaria para...	5833	312	312	1	8e-104	97.35	622	BAM85372.1
apical membrane antigen 1 [Plasmodium falciparum]	Plasmodium f...	malaria para...	5833	297	297	1	9e-104	94.04	181	ADM31350.1
apical membrane antigen 1 [Plasmodium falciparum]	Plasmodium f...	malaria para...	5833	311	311	1	1e-103	97.35	616	AXN69767.1
apical membrane antigen 1 [Plasmodium falciparum]	Plasmodium f...	malaria para...	5833	310	310	1	1e-103	96.69	571	AMM75879.1
apical membrane antigen 1 [Plasmodium falciparum]	Plasmodium f...	malaria para...	5833	311	311	1	1e-103	97.35	622	BCL11785.1
apical membrane antigen 1 [Plasmodium falciparum]	Plasmodium f...	malaria para...	5833	310	310	1	1e-103	97.35	578	ACA24153.1
apical membrane antigen 1 [Plasmodium falciparum]	Plasmodium f...	malaria para...	5833	310	310	1	1e-103	96.69	575	AMM75888.1
apical membrane antigen 1 [Plasmodium falciparum]	Plasmodium f...	malaria para...	5833	308	308	1	1e-103	96.69	520	AMM75855.1
apical membrane antigen 1 [Plasmodium falciparum]	Plasmodium f...	malaria para...	5833	311	311	1	1e-103	97.35	622	ACB87847.1
apical membrane antigen 1 [Plasmodium falciparum]	Plasmodium f...	malaria para...	5833	311	311	1	1e-103	97.35	622	BAM85538.1
apical membrane antigen-1 [Plasmodium falciparum]	Plasmodium f...	malaria para...	5833	311	311	1	1e-103	97.35	622	ANS58278.1
apical membrane antigen 1 [Plasmodium falciparum]	Plasmodium f...	malaria para...	5833	309	309	1	1e-103	96.03	545	AGL76293.1
apical membrane antigen 1 [Plasmodium falciparum]	Plasmodium f...	malaria para...	5833	311	311	1	1e-103	97.35	622	BAM85704.1
apical membrane antigen 1 [Plasmodium falciparum]	Plasmodium f...	malaria para...	5833	308	308	1	1e-103	96.69	520	AFM28892.1
apical membrane antigen 1 [Plasmodium falciparum]	Plasmodium f...	malaria para...	5833	311	311	1	1e-103	97.35	622	ACB87776.1
apical membrane antigen-1 [Plasmodium falciparum]	Plasmodium f...	malaria para...	5833	311	311	1	1e-103	97.35	622	ANS58263.1
apical membrane antigen 1 [Plasmodium falciparum]	Plasmodium f...	malaria para...	5833	308	308	1	2e-103	97.35	520	AFM28571.1
apical membrane antigen 1 [Plasmodium falciparum]	Plasmodium f...	malaria para...	5833	311	311	1	2e-103	97.35	622	BAM85463.1
apical membrane antigen 1 [Plasmodium falciparum]	Plasmodium f...	malaria para...	5833	308	308	1	2e-103	96.69	520	AFM28755.1
apical membrane antigen 1 [Plasmodium falciparum]	Plasmodium f...	malaria para...	5833	311	311	1	2e-103	97.35	622	BAM85539.1
apical membrane antigen 1 [Plasmodium falciparum]	Plasmodium f...	malaria para...	5833	308	308	1	2e-103	96.69	520	AFM28871.1
apical membrane antigen-1 [Plasmodium falciparum]	Plasmodium f...	malaria para...	5833	311	311	1	2e-103	97.35	622	ANS58269.1
apical membrane antigen 1 [Plasmodium falciparum]	Plasmodium f...	malaria para...	5833	311	311	1	2e-103	97.35	616	AXN69748.1
apical membrane antigen 1 [Plasmodium falciparum]	Plasmodium f...	malaria para...	5833	308	308	1	2e-103	97.35	520	AFM28530.1
apical membrane antigen 1 [Plasmodium falciparum]	Plasmodium f...	malaria para...	5833	311	311	1	2e-103	97.35	622	BCL11761.1
apical membrane antigen 1 [Plasmodium falciparum]	Plasmodium f...	malaria para...	5833	311	311	1	2e-103	97.35	622	BAV14260.1
apical membrane antigen-1 [Plasmodium falciparum]	Plasmodium f...	malaria para...	5833	311	311	1	2e-103	97.35	622	ANS58264.1
apical membrane antigen 1 [Plasmodium falciparum]	Plasmodium f...	malaria para...	5833	311	311	1	2e-103	97.35	622	ACB87786.1
apical membrane antigen 1 [Plasmodium falciparum]	Plasmodium f...	malaria para...	5833	311	311	1	2e-103	97.35	622	BAM85401.1
apical membrane antigen 1 [Plasmodium falciparum]	Plasmodium f...	malaria para...	5833	298	298	1	2e-103	94.04	237	AMX81241.1
apical membrane antigen 1 [Plasmodium falciparum]	Plasmodium f...	malaria para...	5833	311	311	1	2e-103	97.35	622	ACB87787.1
apical membrane antigen 1 [Plasmodium falciparum]	Plasmodium f...	malaria para...	5833	297	297	1	2e-103	94.04	210	AMP83736.1
apical membrane antigen 1 [Plasmodium falciparum]	Plasmodium f...	malaria para...	5833	310	310	1	2e-103	97.35	594	ACR49702.1
apical membrane antigen 1 [Plasmodium falciparum]	Plasmodium f...	malaria para...	5833	297	297	1	3e-103	94.04	210	AMP83771.1
apical membrane antigen-1 [Plasmodium falciparum]	Plasmodium f...	malaria para...	5833	311	311	1	3e-103	97.35	622	ANS58317.1
apical membrane antigen 1 [Plasmodium falciparum]	Plasmodium f...	malaria para...	5833	311	311	1	3e-103	97.35	622	ACB87880.1
apical membrane antigen 1 [Plasmodium falciparum]	Plasmodium f...	malaria para...	5833	308	308	1	3e-103	96.69	526	CAB97190.2
apical membrane antigen 1 [Plasmodium falciparum]	Plasmodium f...	malaria para...	5833	311	311	1	3e-103	97.35	622	BAM85518.1
apical membrane antigen-1 [Plasmodium falciparum]	Plasmodium f...	malaria para...	5833	311	311	1	3e-103	97.35	622	ANS58316.1
apical membrane antigen 1 [Plasmodium falciparum]	Plasmodium f...	malaria para...	5833	296	296	1	3e-103	94.04	192	CAD35504.1
apical membrane antigen 1 [Plasmodium falciparum]	Plasmodium f...	malaria para...	5833	311	311	1	3e-103	97.35	622	AAG01325.1
apical membrane antigen 1 [Plasmodium sp. gorilla clade G1]	Plasmodium s...	NA	880534	311	311	1	3e-103	96.69	622	SOS79370.1
AMA-1 R1 [Plasmodium falciparum]	Plasmodium f...	malaria para...	5833	309	309	1	4e-103	96.03	567	ABV02560.1
apical membrane antigen 1 [Plasmodium falciparum]	Plasmodium f...	malaria para...	5833	296	296	1	4e-103	93.38	210	AMP83945.1
apical membrane antigen 1 [Plasmodium falciparum]	Plasmodium f...	malaria para...	5833	310	310	1	4e-103	97.35	622	ACB87818.1
apical membrane antigen 1 [Plasmodium falciparum]	Plasmodium f...	malaria para...	5833	308	308	1	4e-103	96.03	545	AGL76292.1
apical membrane antigen 1 [Plasmodium falciparum]	Plasmodium f...	malaria para...	5833	295	295	1	4e-103	93.38	183	ADM31343.1
apical membrane antigen 1 [Plasmodium falciparum]	Plasmodium f...	malaria para...	5833	298	298	1	5e-103	94.04	242	AMX81236.1
apical membrane antigen 1 [Plasmodium falciparum]	Plasmodium f...	malaria para...	5833	308	308	1	5e-103	96.03	545	AGL76291.1
apical membrane antigen 1 [Plasmodium falciparum]	Plasmodium f...	malaria para...	5833	308	308	1	5e-103	96.03	545	AGL76290.1
apical membrane antigen 1 [Plasmodium falciparum]	Plasmodium f...	malaria para...	5833	310	310	1	5e-103	96.69	622	BAM85598.1
apical membrane antigen-1 [Plasmodium falciparum]	Plasmodium f...	malaria para...	5833	310	310	1	5e-103	96.69	622	ANS58273.1
apical membrane antigen 1 [Plasmodium falciparum]	Plasmodium f...	malaria para...	5833	307	307	1	5e-103	96.69	520	AFM28679.1
apical membrane antigen 1 [Plasmodium falciparum]	Plasmodium f...	malaria para...	5833	307	307	1	5e-103	96.03	520	AFM28596.1
apical membrane antigen 1 [Plasmodium falciparum]	Plasmodium f...	malaria para...	5833	307	307	1	5e-103	96.69	520	AFM28944.1
apical membrane antigen 1 [Plasmodium falciparum]	Plasmodium f...	malaria para...	5833	307	307	1	6e-103	96.03	520	AFM28576.1
apical membrane antigen 1 [Plasmodium falciparum]	Plasmodium f...	malaria para...	5833	310	310	1	6e-103	96.69	622	BAM85680.1
apical membrane antigen 1 [Plasmodium falciparum]	Plasmodium f...	malaria para...	5833	307	307	1	6e-103	96.69	520	AFM28951.1
apical membrane antigen 1 [Plasmodium falciparum]	Plasmodium f...	malaria para...	5833	307	307	1	6e-103	96.03	520	AFM28834.1
apical membrane antigen 1 [Plasmodium falciparum]	Plasmodium f...	malaria para...	5833	307	307	1	6e-103	96.03	520	AFM28835.1
apical membrane antigen 1 [Plasmodium falciparum]	Plasmodium f...	malaria para...	5833	307	307	1	6e-103	96.69	520	AFM28797.1
apical membrane antigen 1 [Plasmodium falciparum]	Plasmodium f...	malaria para...	5833	307	307	1	6e-103	96.69	520	AFM28660.1
apical membrane antigen 1 [Plasmodium falciparum]	Plasmodium f...	malaria para...	5833	307	307	1	6e-103	96.03	520	AFM28590.1
apical membrane antigen 1 [Plasmodium falciparum]	Plasmodium f...	malaria para...	5833	307	307	1	7e-103	96.69	520	AFM28923.1
apical membrane antigen 1 [Plasmodium falciparum]	Plasmodium f...	malaria para...	5833	310	310	1	7e-103	96.69	622	BAV14256.1
apical membrane antigen 1 [Plasmodium falciparum]	Plasmodium f...	malaria para...	5833	306	306	1	7e-103	96.03	520	AFM28864.1
apical membrane antigen 1 [Plasmodium falciparum]	Plasmodium f...	malaria para...	5833	306	306	1	7e-103	96.03	520	AFM28604.1
AMA-1 S1 [Plasmodium falciparum]	Plasmodium f...	malaria para...	5833	306	306	1	8e-103	96.03	520	ABV02565.1
truncated AMA-1 PF1 [Plasmodium falciparum]	Plasmodium f...	malaria para...	5833	308	308	1	8e-103	96.03	562	ABV02570.1
apical membrane antigen 1 [Plasmodium falciparum]	Plasmodium f...	malaria para...	5833	307	307	1	8e-103	96.69	526	CAB97193.1
apical membrane antigen 1 [Plasmodium falciparum]	Plasmodium f...	malaria para...	5833	310	310	1	8e-103	96.69	622	BAM85409.1
apical membrane antigen 1 [Plasmodium falciparum]	Plasmodium f...	malaria para...	5833	308	308	1	8e-103	96.03	576	AMM75887.1
AMA-1 R4 [Plasmodium falciparum]	Plasmodium f...	malaria para...	5833	308	308	1	9e-103	96.03	566	ABV02563.1
apical membrane antigen 1 [Plasmodium falciparum]	Plasmodium f...	malaria para...	5833	309	309	1	1e-102	96.69	622	BCL11735.1
apical membrane antigen 1 [Plasmodium falciparum]	Plasmodium f...	malaria para...	5833	295	295	1	1e-102	93.38	210	AMP83621.1
apical membrane antigen 1 [Plasmodium falciparum]	Plasmodium f...	malaria para...	5833	309	309	1	1e-102	96.69	622	ACB87841.1
apical membrane antigen 1 [Plasmodium falciparum]	Plasmodium f...	malaria para...	5833	309	309	1	1e-102	96.69	622	BCL11742.1
apical membrane antigen 1 [Plasmodium falciparum]	Plasmodium f...	malaria para...	5833	309	309	1	1e-102	96.69	622	BAM85410.1
apical membrane antigen 1 [Plasmodium falciparum]	Plasmodium f...	malaria para...	5833	309	309	1	1e-102	96.69	622	BAV14279.1
apical membrane antigen 1 [Plasmodium falciparum]	Plasmodium f...	malaria para...	5833	309	309	1	1e-102	96.69	622	BCL11763.1
apical membrane antigen 1 [Plasmodium falciparum]	Plasmodium f...	malaria para...	5833	295	295	1	1e-102	93.38	210	AMP83793.1
AMA-1 S5 [Plasmodium falciparum]	Plasmodium f...	malaria para...	5833	308	308	1	1e-102	96.03	567	ABV02569.1
apical membrane antigen 1 [Plasmodium falciparum]	Plasmodium f...	malaria para...	5833	306	306	1	1e-102	96.69	520	AFM28826.1
apical membrane antigen 1 [Plasmodium falciparum]	Plasmodium f...	malaria para...	5833	309	309	1	1e-102	96.69	622	BAM85414.1
AMA-1 S3 [Plasmodium falciparum]	Plasmodium f...	malaria para...	5833	308	308	1	1e-102	96.03	567	ABV02567.1
apical membrane antigen 1 [Plasmodium falciparum]	Plasmodium f...	malaria para...	5833	295	295	1	1e-102	93.38	210	AMP83715.1
apical membrane antigen 1 [Plasmodium falciparum]	Plasmodium f...	malaria para...	5833	309	309	1	1e-102	96.69	622	BAV14283.1
apical membrane antigen 1 [Plasmodium falciparum]	Plasmodium f...	malaria para...	5833	306	306	1	1e-102	96.03	520	AFM28685.1
AMA-1 R2 [Plasmodium falciparum]	Plasmodium f...	malaria para...	5833	307	307	1	2e-102	96.03	567	ABV02561.1
apical membrane antigen 1 [Plasmodium falciparum]	Plasmodium f...	malaria para...	5833	306	306	1	2e-102	96.03	519	AHI17030.1
apical membrane antigen 1 [Plasmodium falciparum]	Plasmodium f...	malaria para...	5833	306	306	1	2e-102	96.03	526	CAB97186.1
apical membrane antigen 1 [Plasmodium falciparum]	Plasmodium f...	malaria para...	5833	306	306	1	2e-102	96.03	526	CAB97182.1
apical membrane antigen-1 [Plasmodium falciparum]	Plasmodium f...	malaria para...	5833	309	309	1	2e-102	96.03	622	AAG50141.1
apical membrane antigen 1 [Plasmodium falciparum]	Plasmodium f...	malaria para...	5833	306	306	1	2e-102	96.03	520	AFM28678.1
apical membrane antigen 1 [Plasmodium falciparum]	Plasmodium f...	malaria para...	5833	306	306	1	2e-102	95.36	520	AFM28902.1
AMA-1 R5 [Plasmodium falciparum]	Plasmodium f...	malaria para...	5833	307	307	1	2e-102	96.03	567	ABV02564.1
apical membrane antigen 1 [Plasmodium falciparum]	Plasmodium f...	malaria para...	5833	306	306	1	2e-102	96.69	526	CAB97201.1
apical membrane antigen 1 [Plasmodium falciparum]	Plasmodium f...	malaria para...	5833	305	305	1	2e-102	96.03	519	AHI17024.1
apical membrane antigen 1 [Plasmodium falciparum]	Plasmodium f...	malaria para...	5833	308	308	1	2e-102	96.03	594	ACR49654.1
apical membrane antigen 1 [Plasmodium falciparum]	Plasmodium f...	malaria para...	5833	308	308	1	2e-102	96.69	594	ACR49695.1
apical membrane antigen 1 [Plasmodium falciparum]	Plasmodium f...	malaria para...	5833	308	308	1	2e-102	96.03	594	ACR49668.1
apical membrane antigen 1 [Plasmodium falciparum]	Plasmodium f...	malaria para...	5833	308	308	1	2e-102	96.69	594	ACR49690.1
apical membrane antigen 1 [Plasmodium falciparum]	Plasmodium f...	malaria para...	5833	294	294	1	3e-102	93.38	192	CAD35624.1
apical membrane antigen 1 [Plasmodium falciparum]	Plasmodium f...	malaria para...	5833	307	307	1	3e-102	96.03	594	ACR49672.1
apical membrane antigen 1 [Plasmodium falciparum]	Plasmodium f...	malaria para...	5833	305	305	1	3e-102	96.03	520	AFM28558.1
apical membrane antigen 1 [Plasmodium falciparum]	Plasmodium f...	malaria para...	5833	307	307	1	3e-102	96.03	578	ACA24154.1
apical membrane antigen 1 [Plasmodium falciparum]	Plasmodium f...	malaria para...	5833	293	293	1	3e-102	93.38	192	CAD35594.1
apical membrane antigen 1 [Plasmodium falciparum]	Plasmodium f...	malaria para...	5833	306	306	1	3e-102	96.03	570	AMM75882.1
apical membrane antigen 1 [Plasmodium falciparum]	Plasmodium f...	malaria para...	5833	295	295	1	4e-102	92.05	242	AMX81235.1
apical membrane antigen 1 [Plasmodium falciparum]	Plasmodium f...	malaria para...	5833	308	308	1	4e-102	96.03	622	BAM85451.1
apical membrane antigen-1 [Plasmodium falciparum]	Plasmodium f...	malaria para...	5833	308	308	1	4e-102	96.69	622	AAG50140.1
apical membrane antigen 1 [Plasmodium falciparum]	Plasmodium f...	malaria para...	5833	308	308	1	4e-102	96.03	622	BAM85443.1
apical membrane antigen 1 [Plasmodium falciparum]	Plasmodium f...	malaria para...	5833	308	308	1	4e-102	96.03	622	ACB87765.1
apical membrane antigen 1 [Plasmodium falciparum]	Plasmodium f...	malaria para...	5833	308	308	1	4e-102	96.03	622	ACB87811.1
apical membrane antigen 1 [Plasmodium falciparum]	Plasmodium f...	malaria para...	5833	308	308	1	4e-102	96.03	622	BAM85445.1
apical membrane antigen 1 [Plasmodium falciparum]	Plasmodium f...	malaria para...	5833	301	301	1	4e-102	94.04	398	AMM75837.1
apical membrane antigen 1 [Plasmodium falciparum]	Plasmodium f...	malaria para...	5833	294	294	1	4e-102	93.38	210	AMP83883.1
apical membrane antigen 1 [Plasmodium falciparum]	Plasmodium f...	malaria para...	5833	305	305	1	4e-102	95.36	520	AFM28628.1
apical membrane antigen 1 [Plasmodium falciparum]	Plasmodium f...	malaria para...	5833	294	294	1	5e-102	92.72	210	AMP83951.1
apical membrane antigen 1 [Plasmodium falciparum]	Plasmodium f...	malaria para...	5833	305	305	1	5e-102	95.36	520	AFM28810.1
apical membrane antigen 1 [Plasmodium falciparum]	Plasmodium f...	malaria para...	5833	308	308	1	5e-102	96.69	622	ACB87804.1
apical membrane antigen 1 [Plasmodium falciparum]	Plasmodium f...	malaria para...	5833	308	308	1	5e-102	96.69	622	ACB87802.1
apical membrane antigen 1 [Plasmodium falciparum]	Plasmodium f...	malaria para...	5833	308	308	1	5e-102	96.03	622	ACB87823.1
apical membrane antigen 1 [Plasmodium falciparum]	Plasmodium f...	malaria para...	5833	305	305	1	5e-102	95.36	520	AFM28559.1
apical membrane antigen 1 [Plasmodium falciparum]	Plasmodium f...	malaria para...	5833	293	293	1	5e-102	93.38	192	CAD35557.1
apical membrane antigen 1 [Plasmodium falciparum]	Plasmodium f...	malaria para...	5833	308	308	1	5e-102	96.03	622	ACB87806.1
apical membrane antigen 1 [Plasmodium falciparum]	Plasmodium f...	malaria para...	5833	294	294	1	5e-102	93.38	210	AMP83617.1
apical membrane antigen 1 [Plasmodium falciparum]	Plasmodium f...	malaria para...	5833	305	305	1	5e-102	95.36	520	AFM28936.1
apical membrane antigen 1 [Plasmodium falciparum]	Plasmodium f...	malaria para...	5833	307	307	1	5e-102	96.03	616	AXN69754.1
apical membrane antigen 1 [Plasmodium falciparum]	Plasmodium f...	malaria para...	5833	306	306	1	5e-102	96.03	594	ACR49713.1
apical membrane antigen 1 [Plasmodium falciparum]	Plasmodium f...	malaria para...	5833	305	305	1	5e-102	95.36	526	CAB97199.1
apical membrane antigen 1 [Plasmodium falciparum]	Plasmodium f...	malaria para...	5833	294	294	1	5e-102	93.38	210	AMP83643.1
apical membrane antigen 1 [Plasmodium falciparum]	Plasmodium f...	malaria para...	5833	305	305	1	5e-102	96.03	520	AFM28526.1
apical membrane antigen 1 [Plasmodium falciparum]	Plasmodium f...	malaria para...	5833	293	293	1	5e-102	92.72	192	CAD35601.1
apical membrane antigen 1 [Plasmodium falciparum]	Plasmodium f...	malaria para...	5833	307	307	1	6e-102	96.03	622	BCL11752.1
apical membrane antigen 1 [Plasmodium falciparum]	Plasmodium f...	malaria para...	5833	304	304	1	6e-102	95.36	520	AFM28785.1
apical membrane antigen 1 [Plasmodium falciparum]	Plasmodium f...	malaria para...	5833	307	307	1	6e-102	96.69	622	ACB87763.1
apical membrane antigen 1 [Plasmodium falciparum]	Plasmodium f...	malaria para...	5833	307	307	1	6e-102	96.69	622	ACB87828.1
apical membrane antigen 1 [Plasmodium falciparum]	Plasmodium f...	malaria para...	5833	304	304	1	6e-102	95.36	520	AFM28632.1
apical membrane antigen 1 [Plasmodium falciparum]	Plasmodium f...	malaria para...	5833	304	304	1	6e-102	95.36	520	AFM28517.1
apical membrane antigen 1 [Plasmodium falciparum]	Plasmodium f...	malaria para...	5833	307	307	1	6e-102	96.03	622	USU92741.1
apical membrane antigen 1 [Plasmodium falciparum]	Plasmodium f...	malaria para...	5833	307	307	1	6e-102	96.69	622	ACB87871.1
apical membrane antigen 1 [Plasmodium falciparum]	Plasmodium f...	malaria para...	5833	293	293	1	7e-102	92.72	210	AMP83878.1
apical membrane antigen 1 [Plasmodium falciparum]	Plasmodium f...	malaria para...	5833	307	307	1	7e-102	96.69	622	BAM85383.1
apical membrane antigen 1 [Plasmodium falciparum]	Plasmodium f...	malaria para...	5833	307	307	1	7e-102	96.69	622	ACB87764.1
apical membrane antigen-1 [Plasmodium falciparum]	Plasmodium f...	malaria para...	5833	307	307	1	7e-102	96.03	622	UIH11094.1
AMA-1 S2 [Plasmodium falciparum]	Plasmodium f...	malaria para...	5833	306	306	1	7e-102	95.36	567	ABV02566.1
apical membrane antigen 1 [Plasmodium falciparum]	Plasmodium f...	malaria para...	5833	306	306	1	7e-102	96.03	594	ACR49764.1
apical membrane antigen 1 [Plasmodium falciparum]	Plasmodium f...	malaria para...	5833	304	304	1	7e-102	96.03	526	CAB97189.1
apical membrane antigen 1 [Plasmodium falciparum]	Plasmodium f...	malaria para...	5833	307	307	1	7e-102	96.03	622	BAM85579.1
apical membrane antigen 1 [Plasmodium falciparum]	Plasmodium f...	malaria para...	5833	307	307	1	7e-102	96.03	622	USU92742.1
apical membrane antigen 1 [Plasmodium falciparum]	Plasmodium f...	malaria para...	5833	293	293	1	7e-102	93.38	210	AMP83630.1
apical membrane antigen-1 [Plasmodium falciparum]	Plasmodium f...	malaria para...	5833	307	307	1	7e-102	96.03	622	UIH11093.1
apical membrane antigen-1 [Plasmodium falciparum]	Plasmodium f...	malaria para...	5833	307	307	1	8e-102	96.03	622	UIH11103.1
apical membrane antigen 1 [Plasmodium falciparum]	Plasmodium f...	malaria para...	5833	307	307	1	8e-102	96.03	622	BAM85529.1
apical membrane antigen 1 [Plasmodium falciparum]	Plasmodium f...	malaria para...	5833	307	307	1	8e-102	96.03	616	AXN69734.1
apical membrane antigen-1 [Plasmodium falciparum]	Plasmodium f...	malaria para...	5833	307	307	1	8e-102	96.03	622	UIH11086.1
apical membrane antigen-1 [Plasmodium falciparum]	Plasmodium f...	malaria para...	5833	307	307	1	8e-102	96.03	622	UIH11118.1
apical membrane antigen-1 [Plasmodium falciparum]	Plasmodium f...	malaria para...	5833	307	307	1	8e-102	96.03	622	UIH11211.1
apical membrane antigen 1 [Plasmodium falciparum]	Plasmodium f...	malaria para...	5833	293	293	1	8e-102	93.38	192	CAD35644.1
apical membrane antigen 1 [Plasmodium falciparum]	Plasmodium f...	malaria para...	5833	293	293	1	8e-102	92.72	192	CAD35585.1
apical membrane antigen-1 [Plasmodium falciparum]	Plasmodium f...	malaria para...	5833	307	307	1	8e-102	96.03	622	UIH11199.1
apical membrane antigen-1 [Plasmodium falciparum]	Plasmodium f...	malaria para...	5833	307	307	1	8e-102	96.03	622	UIH11100.1
apical membrane antigen 1 [Plasmodium falciparum]	Plasmodium f...	malaria para...	5833	293	293	1	9e-102	93.38	210	AMP83622.1
apical membrane antigen-1 [Plasmodium falciparum]	Plasmodium f...	malaria para...	5833	307	307	1	9e-102	96.03	622	UIH11180.1
apical membrane antigen-1 [Plasmodium falciparum]	Plasmodium f...	malaria para...	5833	307	307	1	9e-102	96.03	622	UIH11091.1
apical membrane antigen-1 [Plasmodium falciparum]	Plasmodium f...	malaria para...	5833	307	307	1	9e-102	96.03	622	UIH11138.1
apical membrane antigen-1 [Plasmodium falciparum]	Plasmodium f...	malaria para...	5833	307	307	1	9e-102	96.03	622	UIH11111.1
apical membrane antigen-1 [Plasmodium falciparum]	Plasmodium f...	malaria para...	5833	307	307	1	9e-102	96.03	622	UIH11098.1
apical membrane antigen 1 [Plasmodium falciparum]	Plasmodium f...	malaria para...	5833	307	307	1	9e-102	96.03	622	ACB87800.1
apical membrane antigen-1 [Plasmodium falciparum]	Plasmodium f...	malaria para...	5833	307	307	1	9e-102	96.03	622	UIH11134.1
apical membrane antigen-1 [Plasmodium falciparum]	Plasmodium f...	malaria para...	5833	307	307	1	9e-102	96.03	622	UIH11159.1
apical membrane antigen-1 [Plasmodium falciparum]	Plasmodium f...	malaria para...	5833	307	307	1	9e-102	96.03	622	UIH11129.1
apical membrane antigen-1 [Plasmodium falciparum]	Plasmodium f...	malaria para...	5833	307	307	1	9e-102	96.03	622	UIH11090.1
apical membrane antigen-1 [Plasmodium falciparum]	Plasmodium f...	malaria para...	5833	307	307	1	9e-102	96.03	622	UIH11087.1
apical membrane antigen-1 [Plasmodium falciparum]	Plasmodium f...	malaria para...	5833	307	307	1	1e-101	96.03	622	UIH11105.1
apical membrane antigen-1 [Plasmodium falciparum]	Plasmodium f...	malaria para...	5833	307	307	1	1e-101	96.03	622	UIH11088.1
apical membrane antigen-1 [Plasmodium falciparum]	Plasmodium f...	malaria para...	5833	307	307	1	1e-101	96.03	622	UIH11196.1
apical membrane antigen 1 [Plasmodium falciparum]	Plasmodium f...	malaria para...	5833	292	292	1	1e-101	93.38	192	CAD35656.1
apical membrane antigen 1 [Plasmodium falciparum]	Plasmodium f...	malaria para...	5833	306	306	1	1e-101	96.03	622	ACB87790.1
apical membrane antigen 1 [Plasmodium falciparum]	Plasmodium f...	malaria para...	5833	293	293	1	1e-101	93.38	210	AMP83667.1
AMA-1 S4 [Plasmodium falciparum]	Plasmodium f...	malaria para...	5833	305	305	1	1e-101	95.36	567	ABV02568.1
apical membrane antigen 1 [Plasmodium falciparum]	Plasmodium f...	malaria para...	5833	304	304	1	1e-101	96.03	526	CAB97195.1
apical membrane antigen 1 [Plasmodium falciparum]	Plasmodium f...	malaria para...	5833	306	306	1	1e-101	96.03	622	ACB87814.1
apical membrane antigen 1 [Plasmodium falciparum]	Plasmodium f...	malaria para...	5833	303	303	1	1e-101	95.36	526	CAB97184.1
apical membrane antigen-1 [Plasmodium falciparum]	Plasmodium f...	malaria para...	5833	306	306	1	1e-101	96.03	622	UIH11101.1
apical membrane antigen 1 [Plasmodium falciparum]	Plasmodium f...	malaria para...	5833	293	293	1	1e-101	92.72	210	AMP83709.1
apical membrane antigen 1 [Plasmodium falciparum]	Plasmodium f...	malaria para...	5833	306	306	1	2e-101	96.03	622	BAM85388.1
apical membrane antigen 1 [Plasmodium falciparum]	Plasmodium f...	malaria para...	5833	293	293	1	2e-101	92.72	210	AMP83614.1
apical membrane antigen 1 [Plasmodium falciparum]	Plasmodium f...	malaria para...	5833	292	292	1	2e-101	92.72	210	AMP83661.1
apical membrane antigen 1 [Plasmodium falciparum]	Plasmodium f...	malaria para...	5833	306	306	1	2e-101	96.03	622	BAM85373.1
apical membrane antigen 1 [Plasmodium falciparum]	Plasmodium f...	malaria para...	5833	293	293	1	2e-101	92.72	242	AMX81239.1
apical membrane antigen 1 [Plasmodium falciparum UGT5.1]	Plasmodium f...	NA	1237627	306	306	1	2e-101	96.03	622	EWC75820.1
apical membrane antigen 1 [Plasmodium falciparum]	Plasmodium f...	malaria para...	5833	303	303	1	2e-101	95.36	520	AFM28523.1
apical membrane antigen 1 [Plasmodium falciparum]	Plasmodium f...	malaria para...	5833	306	306	1	2e-101	96.03	622	BCL11781.1
apical membrane antigen 1 [Plasmodium falciparum]	Plasmodium f...	malaria para...	5833	305	305	1	2e-101	95.36	594	ACR49731.1
apical membrane antigen 1 [Plasmodium falciparum]	Plasmodium f...	malaria para...	5833	292	292	1	2e-101	92.05	210	AMP83611.1
apical membrane antigen 1 [Plasmodium falciparum]	Plasmodium f...	malaria para...	5833	292	292	1	2e-101	92.05	210	AMP83618.1
AMA-1 R3 [Plasmodium falciparum]	Plasmodium f...	malaria para...	5833	304	304	1	3e-101	94.7	567	ABV02562.1
apical membrane antigen 1 [Plasmodium falciparum]	Plasmodium f...	malaria para...	5833	291	291	1	3e-101	92.72	191	ADM31352.1
apical membrane antigen 1 [Plasmodium falciparum]	Plasmodium f...	malaria para...	5833	291	291	1	3e-101	92.05	192	CAD35647.1
apical membrane antigen 1 [Plasmodium falciparum]	Plasmodium f...	malaria para...	5833	291	291	1	3e-101	92.05	188	ADM31347.1
apical membrane antigen 1 [Plasmodium falciparum]	Plasmodium f...	malaria para...	5833	305	305	1	3e-101	95.36	594	ACR49766.1
apical membrane antigen 1 [Plasmodium falciparum]	Plasmodium f...	malaria para...	5833	291	291	1	3e-101	92.05	187	ADM31370.1
apical membrane antigen 1 [Plasmodium falciparum]	Plasmodium f...	malaria para...	5833	291	291	1	3e-101	92.05	186	ADM31344.1
apical membrane antigen-1 [Plasmodium falciparum]	Plasmodium f...	malaria para...	5833	306	306	1	3e-101	96.03	622	UIH11186.1
apical membrane antigen 1 [Plasmodium falciparum]	Plasmodium f...	malaria para...	5833	292	292	1	3e-101	93.38	210	AMP83637.1
apical membrane antigen 1 [Plasmodium falciparum]	Plasmodium f...	malaria para...	5833	291	291	1	3e-101	92.05	189	ADM31369.1
apical membrane antigen 1 [Plasmodium falciparum]	Plasmodium f...	malaria para...	5833	291	291	1	3e-101	92.05	210	AMP83613.1
apical membrane antigen-1 [Plasmodium falciparum]	Plasmodium f...	malaria para...	5833	305	305	1	4e-101	95.36	622	UIH11156.1
apical membrane antigen 1 [Plasmodium falciparum]	Plasmodium f...	malaria para...	5833	305	305	1	4e-101	95.36	622	BAM85429.1
apical membrane antigen-1 [Plasmodium falciparum]	Plasmodium f...	malaria para...	5833	305	305	1	4e-101	95.36	622	AAG50146.1
apical membrane antigen-1 [Plasmodium falciparum]	Plasmodium f...	malaria para...	5833	305	305	1	4e-101	96.03	622	UIH11104.1
apical membrane antigen 1 [Plasmodium falciparum]	Plasmodium f...	malaria para...	5833	305	305	1	4e-101	95.36	622	BCL11741.1
apical membrane antigen 1 [Plasmodium falciparum]	Plasmodium f...	malaria para...	5833	302	302	1	4e-101	94.7	519	AHI17031.1
apical membrane antigen-1 [Plasmodium falciparum]	Plasmodium f...	malaria para...	5833	305	305	1	4e-101	96.03	622	UIH11095.1
apical membrane antigen 1 [Plasmodium falciparum]	Plasmodium f...	malaria para...	5833	305	305	1	4e-101	95.36	622	BAM85450.1
apical membrane antigen 1 [Plasmodium falciparum]	Plasmodium f...	malaria para...	5833	291	291	1	4e-101	92.72	210	AMP83778.1
apical membrane antigen 1 [Plasmodium falciparum]	Plasmodium f...	malaria para...	5833	305	305	1	5e-101	95.36	622	BCL11755.1
apical membrane antigen-1 [Plasmodium falciparum]	Plasmodium f...	malaria para...	5833	305	305	1	5e-101	96.03	622	UIH11140.1
apical membrane antigen 1 [Plasmodium falciparum]	Plasmodium f...	malaria para...	5833	305	305	1	6e-101	95.36	622	BAV14244.1
apical membrane antigen 1 [Plasmodium falciparum]	Plasmodium f...	malaria para...	5833	301	301	1	7e-101	95.36	519	AHI16989.1
apical membrane antigen 1 [Plasmodium falciparum]	Plasmodium f...	malaria para...	5833	301	301	1	7e-101	95.36	520	AFM28827.1
apical membrane antigen 1 [Plasmodium falciparum]	Plasmodium f...	malaria para...	5833	290	290	1	7e-101	91.39	183	ADM31353.1
apical membrane antigen 1 [Plasmodium falciparum]	Plasmodium f...	malaria para...	5833	301	301	1	8e-101	95.36	526	CAB97192.1
apical membrane antigen 1 [Plasmodium falciparum]	Plasmodium f...	malaria para...	5833	305	305	1	8e-101	95.36	622	BCL11715.1
apical membrane antigen 1 [Plasmodium falciparum]	Plasmodium f...	malaria para...	5833	290	290	1	9e-101	92.05	192	CAD35646.1
apical membrane antigen 1 [Plasmodium falciparum]	Plasmodium f...	malaria para...	5833	290	290	1	9e-101	92.05	192	CAD35580.1
apical membrane antigen 1 [Plasmodium falciparum]	Plasmodium f...	malaria para...	5833	304	304	1	9e-101	95.36	622	BCL11754.1
apical membrane antigen 1 [Plasmodium falciparum]	Plasmodium f...	malaria para...	5833	303	303	1	9e-101	94.04	572	AMM75877.1
apical membrane antigen 1 [Plasmodium falciparum]	Plasmodium f...	malaria para...	5833	290	290	1	1e-100	92.05	192	CAD35584.1
apical membrane antigen 1 [Plasmodium falciparum]	Plasmodium f...	malaria para...	5833	290	290	1	1e-100	91.39	210	AMP83879.1
apical membrane antigen 1 [Plasmodium falciparum]	Plasmodium f...	malaria para...	5833	301	301	1	1e-100	94.7	520	AFM28816.1
apical membrane antigen 1 [Plasmodium falciparum]	Plasmodium f...	malaria para...	5833	303	303	1	1e-100	95.36	594	ACR49756.1
apical membrane antigen 1 [Plasmodium falciparum]	Plasmodium f...	malaria para...	5833	301	301	1	1e-100	94.7	520	AFM28537.1
apical membrane antigen 1 [Plasmodium falciparum]	Plasmodium f...	malaria para...	5833	301	301	1	1e-100	94.7	520	AFM28568.1
apical membrane antigen 1 [Plasmodium falciparum]	Plasmodium f...	malaria para...	5833	290	290	1	2e-100	92.72	210	AMP83681.1
apical membrane antigen 1 [Plasmodium falciparum]	Plasmodium f...	malaria para...	5833	301	301	1	2e-100	94.7	520	AFM28720.1
apical membrane antigen 1 [Plasmodium falciparum]	Plasmodium f...	malaria para...	5833	300	300	1	2e-100	94.7	520	AFM28519.1
apical membrane antigen 1 [Plasmodium falciparum]	Plasmodium f...	malaria para...	5833	290	290	1	2e-100	92.05	210	AMP83805.1
apical membrane antigen 1 [Plasmodium falciparum]	Plasmodium f...	malaria para...	5833	293	293	1	2e-100	92.05	298	AMM75853.1
apical membrane antigen-1 [Plasmodium falciparum]	Plasmodium f...	malaria para...	5833	302	302	1	2e-100	94.7	580	AIR08610.1
apical membrane antigen 1 [Plasmodium falciparum]	Plasmodium f...	malaria para...	5833	288	288	1	3e-100	91.39	186	ADM31337.1
apical membrane antigen 1 [Plasmodium falciparum]	Plasmodium f...	malaria para...	5833	294	294	1	3e-100	92.05	326	AMM75839.1
apical membrane antigen 1 [Plasmodium falciparum]	Plasmodium f...	malaria para...	5833	288	288	1	3e-100	90.73	187	ADM31332.1
apical membrane antigen 1 [Plasmodium falciparum]	Plasmodium f...	malaria para...	5833	289	289	1	3e-100	91.39	210	AMP83616.1
apical membrane antigen 1 [Plasmodium falciparum]	Plasmodium f...	malaria para...	5833	289	289	1	3e-100	91.39	210	AMP83795.1
apical membrane antigen 1 [Plasmodium falciparum]	Plasmodium f...	malaria para...	5833	301	301	1	3e-100	94.04	576	AMM75878.1
apical membrane antigen 1 [Plasmodium falciparum]	Plasmodium f...	malaria para...	5833	288	288	1	3e-100	91.39	192	CAD35611.1
apical membrane antigen 1 [Plasmodium falciparum]	Plasmodium f...	malaria para...	5833	303	303	1	4e-100	95.36	622	BAM85405.1
apical membrane antigen 1 [Plasmodium falciparum]	Plasmodium f...	malaria para...	5833	288	288	1	4e-100	91.39	180	ADM31342.1
apical membrane antigen 1 [Plasmodium falciparum]	Plasmodium f...	malaria para...	5833	302	302	1	5e-100	95.36	622	BAM85654.1
apical membrane antigen 1 [Plasmodium falciparum]	Plasmodium f...	malaria para...	5833	302	302	1	5e-100	95.36	622	BAM85583.1
apical membrane antigen 1 [Plasmodium falciparum]	Plasmodium f...	malaria para...	5833	302	302	1	5e-100	95.36	622	BAM85601.1
apical membrane antigen-1 [Plasmodium falciparum]	Plasmodium f...	malaria para...	5833	294	294	1	5e-100	93.38	362	ABE73116.1
apical membrane antigen 1 [Plasmodium falciparum]	Plasmodium f...	malaria para...	5833	288	288	1	6e-100	92.05	192	CAD35600.1
apical membrane antigen 1 [Plasmodium falciparum]	Plasmodium f...	malaria para...	5833	301	301	1	7e-100	94.7	574	AMM75884.1
apical membrane antigen 1 [Plasmodium falciparum]	Plasmodium f...	malaria para...	5833	299	299	1	7e-100	94.04	520	AFM28561.1
apical membrane antigen 1 [Plasmodium falciparum]	Plasmodium f...	malaria para...	5833	300	300	1	9e-100	94.7	558	AMM75889.1
apical membrane antigen-1 [Plasmodium falciparum]	Plasmodium f...	malaria para...	5833	301	301	1	1e-99	94.7	622	UIH11146.1
apical membrane antigen 1 [Plasmodium falciparum]	Plasmodium f...	malaria para...	5833	301	301	1	1e-99	94.7	616	AXN69772.1
apical membrane antigen 1 [Plasmodium falciparum]	Plasmodium f...	malaria para...	5833	301	301	1	1e-99	94.7	622	BAV14298.1
apical membrane antigen 1 [Plasmodium falciparum]	Plasmodium f...	malaria para...	5833	298	298	1	1e-99	94.04	520	AFM28946.1
apical membrane antigen 1 [Plasmodium falciparum]	Plasmodium f...	malaria para...	5833	287	287	1	1e-99	91.39	192	CAD35625.1
apical membrane antigen-1 [Plasmodium falciparum]	Plasmodium f...	malaria para...	5833	301	301	1	1e-99	94.7	622	AAG50142.1
apical membrane antigen 1 [Plasmodium falciparum]	Plasmodium f...	malaria para...	5833	298	298	1	1e-99	94.7	520	AFM28524.1
apical membrane antigen 1 [Plasmodium falciparum]	Plasmodium f...	malaria para...	5833	298	298	1	1e-99	94.04	519	AHI16984.1
apical membrane antigen 1 [Plasmodium falciparum]	Plasmodium f...	malaria para...	5833	298	298	1	1e-99	93.38	520	AFM28715.1
apical membrane antigen 1 [Plasmodium falciparum]	Plasmodium f...	malaria para...	5833	298	298	1	1e-99	94.04	519	AHI17054.1
apical membrane antigen 1 [Plasmodium falciparum]	Plasmodium f...	malaria para...	5833	286	286	1	1e-99	90.07	181	ADM31334.1
apical membrane antigen 1 [Plasmodium falciparum]	Plasmodium f...	malaria para...	5833	298	298	1	1e-99	93.38	520	AFM28735.1
apical membrane antigen 1 [Plasmodium falciparum]	Plasmodium f...	malaria para...	5833	298	298	1	1e-99	93.38	520	AFM28899.1
apical membrane antigen 1 [Plasmodium falciparum]	Plasmodium f...	malaria para...	5833	287	287	1	1e-99	91.39	192	CAD35602.1
apical membrane antigen 1 [Plasmodium falciparum]	Plasmodium f...	malaria para...	5833	301	301	1	2e-99	94.7	622	BCL11712.1
apical membrane antigen 1 precursor [Plasmodium falciparum Dd2]	Plasmodium f...	NA	57267	297	297	1	2e-99	94.04	483	KOB88964.1
apical membrane antigen 1 [Plasmodium falciparum]	Plasmodium f...	malaria para...	5833	298	298	1	2e-99	93.38	520	AFM28620.1
apical membrane antigen 1 [Plasmodium falciparum]	Plasmodium f...	malaria para...	5833	298	298	1	2e-99	93.38	520	AFM28702.1
apical membrane antigen 1 [Plasmodium falciparum]	Plasmodium f...	malaria para...	5833	287	287	1	2e-99	91.39	210	AMP83772.1
apical membrane antigen 1 [Plasmodium falciparum]	Plasmodium f...	malaria para...	5833	298	298	1	2e-99	93.38	520	AFM28680.1
apical membrane antigen 1 [Plasmodium falciparum]	Plasmodium f...	malaria para...	5833	299	299	1	2e-99	94.04	545	AGL76295.1
apical membrane antigen 1 [Plasmodium falciparum]	Plasmodium f...	malaria para...	5833	301	301	1	2e-99	94.7	622	BAM85527.1
apical membrane antigen 1 [Plasmodium falciparum]	Plasmodium f...	malaria para...	5833	298	298	1	2e-99	94.04	520	AFM28612.1
apical membrane antigen 1 [Plasmodium falciparum]	Plasmodium f...	malaria para...	5833	298	298	1	2e-99	94.04	520	AFM28638.1
apical membrane antigen 1 [Plasmodium falciparum]	Plasmodium f...	malaria para...	5833	301	301	1	2e-99	94.04	622	BAM85380.1
apical membrane antigen 1 [Plasmodium falciparum]	Plasmodium f...	malaria para...	5833	301	301	1	2e-99	94.7	622	BAM85566.1
apical membrane antigen 1 [Plasmodium falciparum]	Plasmodium f...	malaria para...	5833	301	301	1	2e-99	94.7	622	BCL11767.1
apical membrane antigen 1 [Plasmodium falciparum]	Plasmodium f...	malaria para...	5833	298	298	1	2e-99	94.04	520	AFM28539.1
apical membrane antigen-1 [Plasmodium falciparum]	Plasmodium f...	malaria para...	5833	301	301	1	2e-99	94.7	622	UIH11194.1
apical membrane antigen 1 [Plasmodium falciparum]	Plasmodium f...	malaria para...	5833	298	298	1	2e-99	94.04	520	AFM28565.1
apical membrane antigen 1 [Plasmodium falciparum]	Plasmodium f...	malaria para...	5833	300	300	1	2e-99	94.04	594	ACR49718.1
apical membrane antigen 1 [Plasmodium falciparum]	Plasmodium f...	malaria para...	5833	298	298	1	2e-99	94.04	520	AFM28739.1
apical membrane antigen 1 [Plasmodium falciparum]	Plasmodium f...	malaria para...	5833	298	298	1	2e-99	94.04	520	AFM28728.1
apical membrane antigen 1 [Plasmodium falciparum]	Plasmodium f...	malaria para...	5833	297	297	1	2e-99	93.38	511	AMM75856.1
apical membrane antigen 1 [Plasmodium falciparum]	Plasmodium f...	malaria para...	5833	301	301	1	2e-99	94.7	622	BAM85406.1
apical membrane antigen 1 [Plasmodium falciparum]	Plasmodium f...	malaria para...	5833	298	298	1	2e-99	94.04	520	AFM28535.1
apical membrane antigen 1 [Plasmodium falciparum]	Plasmodium f...	malaria para...	5833	286	286	1	2e-99	90.73	179	ADM31333.1
apical membrane antigen 1 [Plasmodium falciparum]	Plasmodium f...	malaria para...	5833	300	300	1	3e-99	94.04	594	ACR49697.1
apical membrane antigen 1 [Plasmodium falciparum]	Plasmodium f...	malaria para...	5833	298	298	1	3e-99	94.04	520	AFM28838.1
apical membrane antigen 1 [Plasmodium falciparum]	Plasmodium f...	malaria para...	5833	299	299	1	3e-99	94.7	580	AMM75867.1
apical membrane antigen 1 [Plasmodium falciparum]	Plasmodium f...	malaria para...	5833	286	286	1	4e-99	90.73	186	ADM31365.1
apical membrane antigen 1 [Plasmodium falciparum]	Plasmodium f...	malaria para...	5833	286	286	1	4e-99	91.39	192	CAD35631.1
apical membrane antigen 1 [Plasmodium falciparum]	Plasmodium f...	malaria para...	5833	297	297	1	4e-99	93.38	520	AFM28920.1
apical membrane antigen 1 [Plasmodium falciparum]	Plasmodium f...	malaria para...	5833	297	297	1	4e-99	93.38	520	AFM28881.1
apical membrane antigen 1 [Plasmodium falciparum]	Plasmodium f...	malaria para...	5833	300	300	1	4e-99	93.38	622	BCL11772.1
apical membrane antigen 1 [Plasmodium falciparum]	Plasmodium f...	malaria para...	5833	293	293	1	4e-99	92.05	397	AMM75847.1
apical membrane antigen 1 [Plasmodium falciparum]	Plasmodium f...	malaria para...	5833	286	286	1	4e-99	91.39	192	CAD35629.1
apical membrane antigen 1 [Plasmodium falciparum]	Plasmodium f...	malaria para...	5833	290	290	1	4e-99	91.39	310	AMM75851.1
apical membrane antigen-1 [Plasmodium falciparum]	Plasmodium f...	malaria para...	5833	299	299	1	4e-99	94.04	580	AIR08607.1
apical membrane antigen 1 [Plasmodium falciparum]	Plasmodium f...	malaria para...	5833	286	286	1	5e-99	92.05	210	AMP83663.1
apical membrane antigen 1 [Plasmodium falciparum]	Plasmodium f...	malaria para...	5833	297	297	1	5e-99	93.38	520	AFM28830.1
apical membrane antigen 1 [Plasmodium falciparum]	Plasmodium f...	malaria para...	5833	297	297	1	5e-99	94.04	520	AFM28570.1
Chain A, Apical membrane antigen 1 [Plasmodium falciparum...	Plasmodium f...	NA	5835	292	292	1	5e-99	92.05	381	3SRI_A
apical membrane antigen 1 [Plasmodium falciparum]	Plasmodium f...	malaria para...	5833	297	297	1	5e-99	93.38	520	AFM28556.1
apical membrane antigen 1 [Plasmodium falciparum]	Plasmodium f...	malaria para...	5833	297	297	1	5e-99	94.04	520	AFM28662.1
apical membrane antigen 1 [Plasmodium falciparum]	Plasmodium f...	malaria para...	5833	297	297	1	5e-99	93.38	520	AFM28773.1
apical membrane antigen 1 [Plasmodium falciparum]	Plasmodium f...	malaria para...	5833	297	297	1	5e-99	93.38	520	AFM28771.1
apical membrane antigen 1 [Plasmodium falciparum]	Plasmodium f...	malaria para...	5833	297	297	1	6e-99	94.04	520	AFM28705.1
apical membrane antigen 1 [Plasmodium falciparum]	Plasmodium f...	malaria para...	5833	297	297	1	6e-99	94.04	520	AFM28536.1
apical membrane antigen 1 [Plasmodium falciparum]	Plasmodium f...	malaria para...	5833	297	297	1	6e-99	94.04	520	AFM28582.1
apical membrane antigen 1 [Plasmodium falciparum]	Plasmodium f...	malaria para...	5833	296	296	1	6e-99	94.04	519	AHI16986.1
apical membrane antigen 1 [Plasmodium falciparum]	Plasmodium f...	malaria para...	5833	296	296	1	6e-99	94.04	520	AFM28850.1
apical membrane antigen 1 [Plasmodium falciparum]	Plasmodium f...	malaria para...	5833	296	296	1	6e-99	94.04	520	AFM28846.1
apical membrane antigen 1 [Plasmodium falciparum]	Plasmodium f...	malaria para...	5833	296	296	1	6e-99	94.04	520	AFM28646.1
apical membrane antigen 1 [Plasmodium falciparum]	Plasmodium f...	malaria para...	5833	296	296	1	6e-99	94.04	520	AFM28843.1
apical membrane antigen 1 [Plasmodium falciparum]	Plasmodium f...	malaria para...	5833	296	296	1	6e-99	94.04	520	AFM28803.1
apical membrane antigen 1 [Plasmodium falciparum]	Plasmodium f...	malaria para...	5833	296	296	1	6e-99	94.04	520	AFM28653.1
apical membrane antigen 1 [Plasmodium falciparum]	Plasmodium f...	malaria para...	5833	296	296	1	7e-99	94.04	520	AFM28789.1
apical membrane antigen 1 [Plasmodium falciparum]	Plasmodium f...	malaria para...	5833	296	296	1	7e-99	94.04	520	AFM28955.1
apical membrane antigen 1 [Plasmodium falciparum]	Plasmodium f...	malaria para...	5833	299	299	1	7e-99	94.7	594	ACR49724.1
apical membrane antigen 1 [Plasmodium falciparum]	Plasmodium f...	malaria para...	5833	296	296	1	7e-99	94.04	520	AFM28957.1
apical membrane antigen 1 [Plasmodium falciparum]	Plasmodium f...	malaria para...	5833	296	296	1	7e-99	93.38	520	AFM28950.1
apical membrane antigen 1 [Plasmodium falciparum]	Plasmodium f...	malaria para...	5833	296	296	1	8e-99	93.38	520	AFM28942.1
apical membrane antigen 1 [Plasmodium falciparum]	Plasmodium f...	malaria para...	5833	287	287	1	8e-99	90.73	242	AMX81234.1
apical membrane antigen 1 [Plasmodium falciparum]	Plasmodium f...	malaria para...	5833	296	296	1	8e-99	93.38	520	AFM28798.1
apical membrane antigen 1 [Plasmodium falciparum]	Plasmodium f...	malaria para...	5833	285	285	1	9e-99	90.73	192	CAD35640.1
apical membrane antigen 1 [Plasmodium falciparum]	Plasmodium f...	malaria para...	5833	299	299	1	9e-99	94.04	616	AXN69774.1
apical membrane antigen 1 [Plasmodium falciparum]	Plasmodium f...	malaria para...	5833	299	299	1	1e-98	94.04	616	AXN69733.1
apical membrane antigen 1 [Plasmodium falciparum]	Plasmodium f...	malaria para...	5833	285	285	1	1e-98	89.4	187	ADM31339.1
apical membrane antigen 1 [Plasmodium falciparum]	Plasmodium f...	malaria para...	5833	299	299	1	1e-98	94.04	616	AXN69773.1
apical membrane antigen 1 [Plasmodium falciparum]	Plasmodium f...	malaria para...	5833	285	285	1	1e-98	90.73	210	AMP83787.1
apical membrane antigen-1 [Plasmodium falciparum]	Plasmodium f...	malaria para...	5833	299	299	1	1e-98	94.7	622	ANS58318.1
apical membrane antigen 1 [Plasmodium falciparum]	Plasmodium f...	malaria para...	5833	299	299	1	1e-98	94.04	616	AXN69732.1
apical membrane antigen 1 [Plasmodium falciparum]	Plasmodium f...	malaria para...	5833	285	285	1	1e-98	90.73	210	AMP83609.1
apical membrane antigen 1 [Plasmodium falciparum]	Plasmodium f...	malaria para...	5833	296	296	1	1e-98	93.38	520	AFM28972.1
apical membrane antigen 1 [Plasmodium falciparum]	Plasmodium f...	malaria para...	5833	298	298	1	1e-98	94.04	616	AXN69779.1
apical membrane antigen 1 [Plasmodium falciparum]	Plasmodium f...	malaria para...	5833	299	299	1	1e-98	94.04	622	BAM85656.1
apical membrane antigen 1 [Plasmodium falciparum]	Plasmodium f...	malaria para...	5833	295	295	1	1e-98	93.38	510	AMM75842.1
apical membrane antigen 1 [Plasmodium falciparum]	Plasmodium f...	malaria para...	5833	299	299	1	1e-98	94.04	622	BAM85686.1
apical membrane antigen 1 [Plasmodium falciparum]	Plasmodium f...	malaria para...	5833	299	299	1	1e-98	94.04	622	BAM85595.1
apical membrane antigen 1 [Plasmodium falciparum]	Plasmodium f...	malaria para...	5833	285	285	1	1e-98	90.73	210	AMP83770.1
apical membrane antigen 1 [Plasmodium falciparum]	Plasmodium f...	malaria para...	5833	288	288	1	1e-98	91.39	298	AMM75845.1
apical membrane antigen 1 [Plasmodium falciparum]	Plasmodium f...	malaria para...	5833	299	299	1	1e-98	94.7	622	ACB87862.1
apical membrane antigen 1 [Plasmodium falciparum]	Plasmodium f...	malaria para...	5833	285	285	1	1e-98	90.73	210	AMP83693.1
apical membrane antigen 1 [Plasmodium falciparum]	Plasmodium f...	malaria para...	5833	298	298	1	2e-98	94.04	616	AXN69781.1
apical membrane antigen 1 [Plasmodium falciparum]	Plasmodium f...	malaria para...	5833	298	298	1	2e-98	94.04	622	ACB87900.1
apical membrane antigen-1 [Plasmodium falciparum]	Plasmodium f...	malaria para...	5833	298	298	1	2e-98	94.04	622	ANS58282.1
apical membrane antigen-1 [Plasmodium falciparum]	Plasmodium f...	malaria para...	5833	298	298	1	2e-98	94.04	622	AAG50143.1
apical membrane antigen 1 [Plasmodium falciparum]	Plasmodium f...	malaria para...	5833	298	298	1	2e-98	93.38	622	BAV14245.1
Chain A, Apical membrane antigen-1 [Plasmodium falciparum]	Plasmodium f...	malaria para...	5833	290	290	1	2e-98	92.05	336	6N7Q_A
apical membrane antigen 1 [Plasmodium falciparum]	Plasmodium f...	malaria para...	5833	298	298	1	2e-98	94.04	622	BAM85642.1
apical membrane antigen 1 [Plasmodium falciparum]	Plasmodium f...	malaria para...	5833	298	298	1	2e-98	94.04	622	BAN59390.1
apical membrane antigen 1 [Plasmodium falciparum]	Plasmodium f...	malaria para...	5833	298	298	1	2e-98	93.38	622	BCL11713.1
apical membrane antigen 1 [Plasmodium falciparum]	Plasmodium f...	malaria para...	5833	295	295	1	2e-98	92.72	520	AFM28543.1
apical membrane antigen 1 [Plasmodium falciparum]	Plasmodium f...	malaria para...	5833	284	284	1	2e-98	90.73	188	ADM31346.1
apical membrane antigen 1 [Plasmodium falciparum]	Plasmodium f...	malaria para...	5833	298	298	1	2e-98	94.04	622	BAM85460.1
apical membrane antigen 1 [Plasmodium falciparum]	Plasmodium f...	malaria para...	5833	295	295	1	2e-98	92.72	520	AFM28611.1
apical membrane antigen 1 [Plasmodium falciparum]	Plasmodium f...	malaria para...	5833	298	298	1	2e-98	94.04	622	BAM85361.1
apical membrane antigen 1 [Plasmodium falciparum]	Plasmodium f...	malaria para...	5833	295	295	1	2e-98	93.38	520	AFM28978.1
apical membrane antigen 1 [Plasmodium falciparum]	Plasmodium f...	malaria para...	5833	295	295	1	2e-98	92.72	520	AFM28959.1
apical membrane antigen 1 [Plasmodium falciparum]	Plasmodium f...	malaria para...	5833	295	295	1	2e-98	93.38	520	AFM28538.1
apical membrane antigen 1 [Plasmodium falciparum]	Plasmodium f...	malaria para...	5833	298	298	1	2e-98	94.04	622	ACB87872.1
apical membrane antigen 1 [Plasmodium falciparum]	Plasmodium f...	malaria para...	5833	296	296	1	2e-98	94.04	545	AGL76289.1
apical membrane antigen 1 [Plasmodium falciparum]	Plasmodium f...	malaria para...	5833	295	295	1	2e-98	93.38	520	AFM28627.1
apical membrane antigen 1 [Plasmodium falciparum]	Plasmodium f...	malaria para...	5833	298	298	1	3e-98	94.04	622	ACB87842.1
apical membrane antigen 1 [Plasmodium falciparum]	Plasmodium f...	malaria para...	5833	295	295	1	3e-98	92.72	520	AFM28581.1
apical membrane antigen 1 [Plasmodium falciparum]	Plasmodium f...	malaria para...	5833	295	295	1	3e-98	92.72	520	AFM28648.1
apical membrane antigen 1 [Plasmodium falciparum]	Plasmodium f...	malaria para...	5833	295	295	1	3e-98	92.72	520	AFM28749.1
apical membrane antigen 1 [Plasmodium falciparum]	Plasmodium f...	malaria para...	5833	295	295	1	3e-98	92.72	520	AFM28693.1
apical membrane antigen 1 [Plasmodium falciparum]	Plasmodium f...	malaria para...	5833	295	295	1	3e-98	92.72	520	AFM28721.1
apical membrane antigen 1 [Plasmodium falciparum]	Plasmodium f...	malaria para...	5833	295	295	1	3e-98	92.72	520	AFM28832.1
apical membrane antigen 1 [Plasmodium falciparum]	Plasmodium f...	malaria para...	5833	295	295	1	3e-98	93.38	520	AFM28697.1
apical membrane antigen 1 [Plasmodium falciparum]	Plasmodium f...	malaria para...	5833	297	297	1	3e-98	93.38	594	ACR49711.1
apical membrane antigen 1 [Plasmodium falciparum]	Plasmodium f...	malaria para...	5833	298	298	1	3e-98	94.04	616	AXN69731.1
apical membrane antigen 1 [Plasmodium falciparum]	Plasmodium f...	malaria para...	5833	295	295	1	3e-98	92.72	509	AMM75849.1
apical membrane antigen 1 [Plasmodium falciparum]	Plasmodium f...	malaria para...	5833	295	295	1	3e-98	93.38	520	AFM28940.1
apical membrane antigen 1 [Plasmodium falciparum]	Plasmodium f...	malaria para...	5833	295	295	1	3e-98	93.38	519	AHI16985.1
apical membrane antigen 1 [Plasmodium falciparum]	Plasmodium f...	malaria para...	5833	295	295	1	3e-98	92.72	520	AFM28667.1
apical membrane antigen 1 [Plasmodium falciparum]	Plasmodium f...	malaria para...	5833	295	295	1	3e-98	92.72	520	AFM28802.1
apical membrane antigen 1 [Plasmodium falciparum]	Plasmodium f...	malaria para...	5833	295	295	1	4e-98	92.72	520	AFM28893.1
apical membrane antigen 1 [Plasmodium falciparum]	Plasmodium f...	malaria para...	5833	295	295	1	4e-98	92.72	519	AHI16995.1
apical membrane antigen 1 [Plasmodium falciparum]	Plasmodium f...	malaria para...	5833	297	297	1	4e-98	94.04	616	AXN69725.1
apical membrane antigen 1 [Plasmodium falciparum]	Plasmodium f...	malaria para...	5833	295	295	1	4e-98	93.38	520	AFM28613.1
apical membrane antigen 1 [Plasmodium falciparum]	Plasmodium f...	malaria para...	5833	295	295	1	4e-98	93.38	520	AFM28935.1
apical membrane antigen 1 [Plasmodium falciparum]	Plasmodium f...	malaria para...	5833	295	295	1	4e-98	92.72	520	AFM28707.1
apical membrane antigen 1 [Plasmodium falciparum]	Plasmodium f...	malaria para...	5833	295	295	1	4e-98	92.72	520	AFM28616.1
apical membrane antigen 1 [Plasmodium falciparum]	Plasmodium f...	malaria para...	5833	295	295	1	4e-98	93.38	520	AFM28525.1
apical membrane antigen 1 [Plasmodium falciparum]	Plasmodium f...	malaria para...	5833	295	295	1	4e-98	92.72	520	AFM28602.1
apical membrane antigen 1 [Plasmodium falciparum]	Plasmodium f...	malaria para...	5833	297	297	1	4e-98	94.04	594	ACR49759.1
apical membrane antigen 1 [Plasmodium falciparum]	Plasmodium f...	malaria para...	5833	295	295	1	4e-98	92.72	520	AFM28824.1
apical membrane antigen 1 [Plasmodium falciparum]	Plasmodium f...	malaria para...	5833	295	295	1	4e-98	92.72	520	AFM28852.1
apical membrane antigen 1 [Plasmodium falciparum]	Plasmodium f...	malaria para...	5833	295	295	1	4e-98	92.72	520	AFM28563.1
apical membrane antigen 1 [Plasmodium falciparum]	Plasmodium f...	malaria para...	5833	295	295	1	4e-98	92.72	520	AFM28744.1
apical membrane antigen 1 [Plasmodium falciparum]	Plasmodium f...	malaria para...	5833	295	295	1	4e-98	92.72	520	AFM28904.1
apical membrane antigen 1 [Plasmodium falciparum]	Plasmodium f...	malaria para...	5833	295	295	1	4e-98	92.72	526	CAB97185.1
apical membrane antigen 1 [Plasmodium falciparum]	Plasmodium f...	malaria para...	5833	297	297	1	4e-98	94.04	594	ACR49750.1
apical membrane antigen 1 [Plasmodium falciparum]	Plasmodium f...	malaria para...	5833	297	297	1	4e-98	94.04	594	ACR49660.1
apical membrane antigen 1 [Plasmodium falciparum]	Plasmodium f...	malaria para...	5833	295	295	1	4e-98	92.72	520	AFM28593.1
apical membrane antigen 1 [Plasmodium falciparum]	Plasmodium f...	malaria para...	5833	295	295	1	4e-98	92.72	520	AFM28605.1
apical membrane antigen 1 [Plasmodium falciparum]	Plasmodium f...	malaria para...	5833	295	295	1	4e-98	92.72	520	AFM28575.1
apical membrane antigen 1 [Plasmodium falciparum]	Plasmodium f...	malaria para...	5833	295	295	1	4e-98	93.38	520	AFM28622.1
apical membrane antigen 1 [Plasmodium falciparum]	Plasmodium f...	malaria para...	5833	295	295	1	4e-98	92.72	520	AFM28717.1
apical membrane antigen-1 [Plasmodium falciparum]	Plasmodium f...	malaria para...	5833	297	297	1	4e-98	93.38	604	AAC47107.1
Chain A, Apical membrane antigen 1 [Plasmodium falciparum...	Plasmodium f...	NA	5838	288	288	1	4e-98	91.39	335	4R1A_A
apical membrane antigen 1 [Plasmodium falciparum]	Plasmodium f...	malaria para...	5833	295	295	1	4e-98	92.72	520	AFM28746.1
apical membrane antigen 1 [Plasmodium falciparum]	Plasmodium f...	malaria para...	5833	295	295	1	4e-98	92.72	520	AFM28901.1
apical membrane antigen 1 [Plasmodium falciparum]	Plasmodium f...	malaria para...	5833	295	295	1	4e-98	92.72	520	AFM28647.1
apical membrane antigen 1 [Plasmodium falciparum]	Plasmodium f...	malaria para...	5833	297	297	1	4e-98	92.72	622	BCL11790.1
apical membrane antigen 1 [Plasmodium falciparum]	Plasmodium f...	malaria para...	5833	297	297	1	4e-98	94.04	622	BAM85486.1
apical membrane antigen 1 [Plasmodium falciparum]	Plasmodium f...	malaria para...	5833	295	295	1	4e-98	92.72	520	AFM28691.1
apical membrane antigen 1 [Plasmodium falciparum]	Plasmodium f...	malaria para...	5833	295	295	1	5e-98	92.72	520	AFM28564.1
apical membrane antigen 1 [Plasmodium falciparum]	Plasmodium f...	malaria para...	5833	295	295	1	5e-98	92.72	520	AFM28848.1
Chain A, Apical membrane antigen-1 [Plasmodium falciparum]	Plasmodium f...	malaria para...	5833	288	288	1	5e-98	91.39	336	6N87_A
apical membrane antigen 1 [Plasmodium falciparum]	Plasmodium f...	malaria para...	5833	294	294	1	5e-98	92.72	520	AFM28649.1
apical membrane antigen 1 [Plasmodium falciparum]	Plasmodium f...	malaria para...	5833	297	297	1	5e-98	93.38	622	ACB87792.1
apical membrane antigen 1 [Plasmodium falciparum]	Plasmodium f...	malaria para...	5833	297	297	1	5e-98	93.38	622	BAM85371.1
apical membrane antigen 1 [Plasmodium falciparum]	Plasmodium f...	malaria para...	5833	297	297	1	5e-98	93.38	622	ACB87808.1
apical membrane antigen 1 [Plasmodium falciparum]	Plasmodium f...	malaria para...	5833	297	297	1	5e-98	93.38	622	BAM85392.1
apical membrane antigen 1 [Plasmodium falciparum]	Plasmodium f...	malaria para...	5833	294	294	1	5e-98	92.72	520	AFM28567.1
apical membrane antigen 1 [Plasmodium falciparum]	Plasmodium f...	malaria para...	5833	294	294	1	5e-98	92.72	520	AFM28631.1
apical membrane antigen-1 [Plasmodium falciparum]	Plasmodium f...	malaria para...	5833	297	297	1	5e-98	94.04	622	ANS58290.1
apical membrane antigen 1 [Plasmodium falciparum]	Plasmodium f...	malaria para...	5833	297	297	1	5e-98	93.38	616	AXN69765.1
apical membrane antigen-1 [Plasmodium falciparum]	Plasmodium f...	malaria para...	5833	297	297	1	5e-98	94.04	622	ANS58286.1
apical membrane antigen-1 [Plasmodium falciparum]	Plasmodium f...	malaria para...	5833	297	297	1	5e-98	93.38	622	AAG50145.1
apical membrane antigen 1 [Plasmodium falciparum]	Plasmodium f...	malaria para...	5833	297	297	1	5e-98	93.38	622	BAM85362.1
apical membrane antigen-1 [Plasmodium falciparum]	Plasmodium f...	malaria para...	5833	297	297	1	5e-98	94.04	622	ANS58311.1
apical membrane antigen 1 [Plasmodium falciparum]	Plasmodium f...	malaria para...	5833	294	294	1	5e-98	92.72	520	AFM28529.1
apical membrane antigen 1 [Plasmodium falciparum]	Plasmodium f...	malaria para...	5833	294	294	1	5e-98	92.72	520	AFM28918.1
apical membrane antigen 1 [Plasmodium falciparum]	Plasmodium f...	malaria para...	5833	294	294	1	6e-98	92.72	520	AFM28945.1
apical membrane antigen 1 [Plasmodium falciparum]	Plasmodium f...	malaria para...	5833	297	297	1	6e-98	93.38	622	ACB87899.1
apical membrane antigen 1 [Plasmodium falciparum]	Plasmodium f...	malaria para...	5833	297	297	1	6e-98	94.04	616	AXN69726.1
apical membrane antigen-1 [Plasmodium falciparum]	Plasmodium f...	malaria para...	5833	297	297	1	6e-98	94.04	622	AAG50134.1
apical membrane antigen 1 [Plasmodium falciparum]	Plasmodium f...	malaria para...	5833	283	283	1	6e-98	90.73	210	AMP83728.1
RecName: Full=Apical membrane antigen 1; AltName: Full=Merozoi...	Plasmodium f...	NA	70151	297	297	1	6e-98	93.38	622	P50491.1
apical membrane antigen 1 [Plasmodium falciparum]	Plasmodium f...	malaria para...	5833	297	297	1	7e-98	93.38	616	AXN69764.1
apical membrane antigen 1 [Plasmodium falciparum]	Plasmodium f...	malaria para...	5833	294	294	1	7e-98	93.38	526	CAB97187.1
apical membrane antigen 1 [Plasmodium falciparum]	Plasmodium f...	malaria para...	5833	297	297	1	7e-98	94.04	622	ACB87780.1
apical membrane antigen 1 [Plasmodium falciparum]	Plasmodium f...	malaria para...	5833	297	297	1	7e-98	93.38	616	AXN69768.1
apical membrane antigen 1 [Plasmodium falciparum]	Plasmodium f...	malaria para...	5833	297	297	1	7e-98	94.04	622	BAM85399.1
apical membrane antigen-1 [Plasmodium falciparum]	Plasmodium f...	malaria para...	5833	297	297	1	7e-98	94.04	622	ANS58287.1
apical membrane antigen-1 [Plasmodium falciparum]	Plasmodium f...	malaria para...	5833	289	289	1	7e-98	91.39	362	ABE73117.1
apical membrane antigen-1 [Plasmodium falciparum]	Plasmodium f...	malaria para...	5833	297	297	1	7e-98	93.38	622	AAG50130.1
apical membrane antigen 1 [Plasmodium falciparum]	Plasmodium f...	malaria para...	5833	283	283	1	7e-98	90.73	210	AMP83825.1
apical membrane antigen 1 [Plasmodium falciparum]	Plasmodium f...	malaria para...	5833	297	297	1	7e-98	94.04	622	BCL11747.1
apical membrane antigen 1 [Plasmodium falciparum]	Plasmodium f...	malaria para...	5833	295	295	1	7e-98	92.72	545	AGL76294.1
apical membrane antigen 1 [Plasmodium falciparum]	Plasmodium f...	malaria para...	5833	297	297	1	8e-98	94.04	622	BAM85555.1
apical membrane antigen 1 [Plasmodium falciparum]	Plasmodium f...	malaria para...	5833	297	297	1	8e-98	94.04	622	BAM85436.1
apical membrane antigen 1 [Plasmodium falciparum]	Plasmodium f...	malaria para...	5833	297	297	1	8e-98	93.38	622	ACB87775.1
apical membrane antigen 1 [Plasmodium falciparum]	Plasmodium f...	malaria para...	5833	297	297	1	8e-98	94.04	622	ACB87837.1
apical membrane antigen 1 [Plasmodium falciparum]	Plasmodium f...	malaria para...	5833	297	297	1	8e-98	94.04	622	BAV14289.1
apical membrane antigen-1 [Plasmodium falciparum]	Plasmodium f...	malaria para...	5833	297	297	1	8e-98	93.38	622	UIH11176.1
apical membrane antigen 1 [Plasmodium falciparum]	Plasmodium f...	malaria para...	5833	294	294	1	8e-98	92.05	520	AFM28671.1
apical membrane antigen 1 [Plasmodium falciparum]	Plasmodium f...	malaria para...	5833	294	294	1	8e-98	93.38	520	AFM28675.1
apical membrane antigen 1 [Plasmodium falciparum]	Plasmodium f...	malaria para...	5833	297	297	1	8e-98	94.04	622	BAM85440.1
apical membrane antigen 1 [Plasmodium falciparum]	Plasmodium f...	malaria para...	5833	297	297	1	8e-98	94.04	622	BAM85452.1
apical membrane antigen 1 [Plasmodium falciparum]	Plasmodium f...	malaria para...	5833	297	297	1	8e-98	94.04	622	BAM85427.1
apical membrane antigen 1 [Plasmodium falciparum]	Plasmodium f...	malaria para...	5833	297	297	1	8e-98	93.38	622	ACB87903.1
apical membrane antigen 1 [Plasmodium falciparum]	Plasmodium f...	malaria para...	5833	296	296	1	9e-98	94.04	622	BAM85703.1
apical membrane antigen 1 [Plasmodium falciparum]	Plasmodium f...	malaria para...	5833	296	296	1	9e-98	94.04	622	ACB87870.1
apical membrane antigen 1 [Plasmodium falciparum]	Plasmodium f...	malaria para...	5833	296	296	1	9e-98	93.38	622	ACB87877.1
apical membrane antigen 1 [Plasmodium falciparum]	Plasmodium f...	malaria para...	5833	296	296	1	9e-98	93.38	622	BAV14297.1
apical membrane antigen 1 [Plasmodium falciparum]	Plasmodium f...	malaria para...	5833	296	296	1	1e-97	94.04	622	ACB87831.1
apical membrane antigen 1 [Plasmodium falciparum]	Plasmodium f...	malaria para...	5833	296	296	1	1e-97	93.38	616	AXN69784.1
apical membrane antigen 1 [Plasmodium falciparum]	Plasmodium f...	malaria para...	5833	296	296	1	1e-97	94.04	622	USU92747.1
apical membrane antigen 1 [Plasmodium falciparum]	Plasmodium f...	malaria para...	5833	293	293	1	1e-97	91.39	520	AFM28811.1
apical membrane antigen 1 [Plasmodium falciparum]	Plasmodium f...	malaria para...	5833	293	293	1	1e-97	93.38	520	AFM28624.1
apical membrane antigen 1 [Plasmodium falciparum]	Plasmodium f...	malaria para...	5833	293	293	1	1e-97	92.72	520	AFM28574.1
apical membrane antigen 1 [Plasmodium falciparum]	Plasmodium f...	malaria para...	5833	293	293	1	1e-97	93.38	520	AFM28601.1
apical membrane antigen 1 [Plasmodium falciparum]	Plasmodium f...	malaria para...	5833	296	296	1	1e-97	93.38	622	BAM85458.1
apical membrane antigen 1 [Plasmodium falciparum]	Plasmodium f...	malaria para...	5833	293	293	1	1e-97	93.38	520	AFM28522.1
apical membrane antigen-1 [Plasmodium falciparum]	Plasmodium f...	malaria para...	5833	296	296	1	1e-97	93.38	622	ANS58265.1
apical membrane antigen 1 [Plasmodium falciparum]	Plasmodium f...	malaria para...	5833	283	283	1	1e-97	90.07	210	AMP83710.1
apical membrane antigen 1 [Plasmodium falciparum]	Plasmodium f...	malaria para...	5833	293	293	1	1e-97	92.05	519	AHI17047.1
apical membrane antigen 1 [Plasmodium falciparum]	Plasmodium f...	malaria para...	5833	296	296	1	1e-97	93.38	622	USU92739.1
apical membrane antigen 1 [Plasmodium falciparum]	Plasmodium f...	malaria para...	5833	287	287	1	1e-97	91.39	332	AMM75843.1
apical membrane antigen-1 [Plasmodium falciparum]	Plasmodium f...	malaria para...	5833	296	296	1	1e-97	93.38	622	ANS58319.1
apical membrane antigen-1 [Plasmodium falciparum]	Plasmodium f...	malaria para...	5833	296	296	1	1e-97	93.38	622	ANS58299.1
apical membrane antigen 1 [Plasmodium falciparum]	Plasmodium f...	malaria para...	5833	296	296	1	1e-97	93.38	622	BAV14288.1
apical membrane antigen 1 [Plasmodium falciparum]	Plasmodium f...	malaria para...	5833	296	296	1	1e-97	93.38	622	BAM85556.1
apical membrane antigen 1 [Plasmodium falciparum]	Plasmodium f...	malaria para...	5833	296	296	1	1e-97	93.38	616	AXN69727.1
apical membrane antigen 1 [Plasmodium falciparum]	Plasmodium f...	malaria para...	5833	294	294	1	1e-97	93.38	545	AGL76288.1
apical membrane antigen 1 [Plasmodium falciparum]	Plasmodium f...	malaria para...	5833	296	296	1	1e-97	93.38	622	ACB87754.1
apical membrane antigen 1 [Plasmodium falciparum]	Plasmodium f...	malaria para...	5833	296	296	1	1e-97	93.38	622	BAM85564.1
apical membrane antigen 1 [Plasmodium falciparum]	Plasmodium f...	malaria para...	5833	295	295	1	1e-97	92.72	575	AMM75885.1
apical membrane antigen 1 [Plasmodium falciparum]	Plasmodium f...	malaria para...	5833	296	296	1	1e-97	93.38	622	BAM85582.1
apical membrane antigen 1 [Plasmodium falciparum]	Plasmodium f...	malaria para...	5833	295	295	1	1e-97	93.38	594	ACR49674.1
apical membrane antigen-1 [Plasmodium falciparum]	Plasmodium f...	malaria para...	5833	296	296	1	1e-97	93.38	622	UIH11187.1
apical membrane antigen 1 [Plasmodium falciparum]	Plasmodium f...	malaria para...	5833	293	293	1	1e-97	93.38	520	AFM28626.1
apical membrane antigen 1 [Plasmodium falciparum]	Plasmodium f...	malaria para...	5833	295	295	1	1e-97	92.72	594	ACR49667.1
apical membrane antigen 1 [Plasmodium falciparum]	Plasmodium f...	malaria para...	5833	293	293	1	1e-97	92.72	520	AFM28742.1
apical membrane antigen 1 [Plasmodium falciparum]	Plasmodium f...	malaria para...	5833	282	282	1	2e-97	90.73	210	AMP83627.1
apical membrane antigen 1 [Plasmodium falciparum]	Plasmodium f...	malaria para...	5833	296	296	1	2e-97	93.38	622	BAM85561.1
apical membrane antigen 1 [Plasmodium falciparum]	Plasmodium f...	malaria para...	5833	293	293	1	2e-97	93.38	520	AFM28673.1
truncated AMA-1 PF7 [Plasmodium falciparum]	Plasmodium f...	malaria para...	5833	294	294	1	2e-97	92.72	562	ABV02571.1
apical membrane antigen-1 [Plasmodium falciparum]	Plasmodium f...	malaria para...	5833	296	296	1	2e-97	93.38	622	UIH11212.1
apical membrane antigen 1 [Plasmodium falciparum]	Plasmodium f...	malaria para...	5833	295	295	1	2e-97	92.72	594	ACR49745.1
apical membrane antigen 1 [Plasmodium falciparum]	Plasmodium f...	malaria para...	5833	293	293	1	2e-97	92.72	520	AFM28599.1
apical membrane antigen 1 [Plasmodium falciparum]	Plasmodium f...	malaria para...	5833	295	295	1	2e-97	92.72	594	ACR49682.1
apical membrane antigen 1 [Plasmodium falciparum]	Plasmodium f...	malaria para...	5833	293	293	1	2e-97	93.38	520	AFM28553.1
apical membrane antigen 1 [Plasmodium falciparum]	Plasmodium f...	malaria para...	5833	295	295	1	2e-97	93.38	594	ACR49679.1
apical membrane antigen 1 [Plasmodium falciparum]	Plasmodium f...	malaria para...	5833	296	296	1	2e-97	94.04	622	BAM85417.1
apical membrane antigen 1 [Plasmodium falciparum]	Plasmodium f...	malaria para...	5833	296	296	1	2e-97	93.38	622	ACB87751.1
apical membrane antigen 1 [Plasmodium falciparum]	Plasmodium f...	malaria para...	5833	293	293	1	2e-97	92.72	520	AFM28880.1
apical membrane antigen-1 [Plasmodium falciparum]	Plasmodium f...	malaria para...	5833	295	295	1	2e-97	93.38	592	AAC47105.1
apical membrane antigen 1 [Plasmodium falciparum]	Plasmodium f...	malaria para...	5833	296	296	1	2e-97	93.38	622	ACB87773.1
apical membrane antigen-1 [Plasmodium falciparum]	Plasmodium f...	malaria para...	5833	296	296	1	2e-97	93.38	622	UIH11179.1
apical membrane antigen-1 [Plasmodium falciparum]	Plasmodium f...	malaria para...	5833	296	296	1	2e-97	93.38	622	UIH11107.1
apical membrane antigen 1 [Plasmodium falciparum]	Plasmodium f...	malaria para...	5833	293	293	1	2e-97	92.72	526	CAB97194.1
apical membrane antigen-1 [Plasmodium falciparum]	Plasmodium f...	malaria para...	5833	296	296	1	2e-97	93.38	622	UIH11144.1
apical membrane antigen 1 [Plasmodium falciparum]	Plasmodium f...	malaria para...	5833	295	295	1	2e-97	92.72	594	ACR49715.1
apical membrane antigen 1 [Plasmodium falciparum]	Plasmodium f...	malaria para...	5833	296	296	1	2e-97	93.38	622	BAM85631.1
apical membrane antigen 1 [Plasmodium falciparum]	Plasmodium f...	malaria para...	5833	293	293	1	2e-97	92.05	520	AFM28841.1
apical membrane antigen 1 [Plasmodium falciparum]	Plasmodium f...	malaria para...	5833	293	293	1	2e-97	92.05	520	AFM28752.1
apical membrane antigen-1 [Plasmodium falciparum]	Plasmodium f...	malaria para...	5833	296	296	1	2e-97	93.38	622	UIH11119.1
apical membrane antigen 1 [Plasmodium falciparum]	Plasmodium f...	malaria para...	5833	295	295	1	2e-97	93.38	616	AXN69745.1
apical membrane antigen 1 [Plasmodium falciparum]	Plasmodium f...	malaria para...	5833	295	295	1	2e-97	93.38	616	AXN69746.1
apical membrane antigen 1 [Plasmodium falciparum]	Plasmodium f...	malaria para...	5833	293	293	1	2e-97	92.05	520	AFM28668.1
apical membrane antigen 1 [Plasmodium falciparum]	Plasmodium f...	malaria para...	5833	295	295	1	2e-97	92.72	594	ACR49666.1
apical membrane antigen 1 [Plasmodium falciparum]	Plasmodium f...	malaria para...	5833	295	295	1	2e-97	92.72	594	ACR49706.1
apical membrane antigen 1 [Plasmodium falciparum]	Plasmodium f...	malaria para...	5833	292	292	1	3e-97	92.05	520	AFM28756.1
apical membrane antigen 1 [Plasmodium falciparum]	Plasmodium f...	malaria para...	5833	292	292	1	3e-97	92.05	520	AFM28766.1
apical membrane antigen 1 [Plasmodium falciparum]	Plasmodium f...	malaria para...	5833	295	295	1	3e-97	92.72	594	ACR49726.1
apical membrane antigen 1 [Plasmodium falciparum]	Plasmodium f...	malaria para...	5833	295	295	1	3e-97	93.38	594	ACR49722.1
apical membrane antigen 1 [Plasmodium falciparum]	Plasmodium f...	malaria para...	5833	291	291	1	3e-97	91.39	472	AMM75840.1
apical membrane antigen 1 [Plasmodium falciparum]	Plasmodium f...	malaria para...	5833	295	295	1	3e-97	92.72	594	ACR49665.1
apical membrane antigen-1 [Plasmodium falciparum]	Plasmodium f...	malaria para...	5833	295	295	1	3e-97	93.38	622	ANS58309.1
apical membrane antigen-1 [Plasmodium falciparum]	Plasmodium f...	malaria para...	5833	295	295	1	3e-97	92.72	620	AAB50405.1
apical membrane antigen 1 [Plasmodium falciparum]	Plasmodium f...	malaria para...	5833	295	295	1	3e-97	93.38	622	ACB87836.1
apical membrane antigen 1 [Plasmodium falciparum]	Plasmodium f...	malaria para...	5833	295	295	1	3e-97	93.38	622	BAM85360.1
apical membrane antigen 1 [Plasmodium falciparum]	Plasmodium f...	malaria para...	5833	295	295	1	3e-97	92.72	594	ACR49688.1
apical membrane antigen 1 [Plasmodium falciparum]	Plasmodium f...	malaria para...	5833	295	295	1	3e-97	92.72	622	ACB87812.1
apical membrane antigen 1 [Plasmodium falciparum]	Plasmodium f...	malaria para...	5833	295	295	1	3e-97	92.72	594	ACR49692.1
apical membrane antigen 1 [Plasmodium falciparum]	Plasmodium f...	malaria para...	5833	295	295	1	3e-97	92.72	622	ACB87830.1
apical membrane antigen 1 [Plasmodium falciparum]	Plasmodium f...	malaria para...	5833	295	295	1	3e-97	92.72	622	USU92736.1
apical membrane antigen 1 [Plasmodium falciparum]	Plasmodium f...	malaria para...	5833	295	295	1	3e-97	92.72	622	USU92744.1
apical membrane antigen 1 [Plasmodium falciparum]	Plasmodium f...	malaria para...	5833	292	292	1	3e-97	92.05	520	AFM28919.1
apical membrane antigen 1 [Plasmodium falciparum]	Plasmodium f...	malaria para...	5833	292	292	1	3e-97	92.05	520	AFM28911.1
apical membrane antigen 1 [Plasmodium falciparum]	Plasmodium f...	malaria para...	5833	292	292	1	3e-97	92.05	520	AFM28617.1
apical membrane antigen 1 [Plasmodium falciparum]	Plasmodium f...	malaria para...	5833	295	295	1	3e-97	92.72	622	USU92740.1
apical membrane antigen 1 [Plasmodium falciparum]	Plasmodium f...	malaria para...	5833	295	295	1	3e-97	93.38	622	BAM85470.1
apical membrane antigen-1 [Plasmodium falciparum]	Plasmodium f...	malaria para...	5833	295	295	1	3e-97	92.72	622	AAG50131.1
apical membrane antigen 1 [Plasmodium falciparum]	Plasmodium f...	malaria para...	5833	295	295	1	3e-97	93.38	622	BAM85521.1
apical membrane antigen 1 [Plasmodium falciparum]	Plasmodium f...	malaria para...	5833	295	295	1	4e-97	93.38	622	BAM85671.1
apical membrane antigen 1 [Plasmodium falciparum]	Plasmodium f...	malaria para...	5833	295	295	1	4e-97	93.38	616	AXN69723.1
apical membrane antigen 1 [Plasmodium falciparum]	Plasmodium f...	malaria para...	5833	294	294	1	4e-97	92.72	594	ACR49748.1
apical membrane antigen 1 [Plasmodium falciparum]	Plasmodium f...	malaria para...	5833	294	294	1	4e-97	92.72	594	ACR49662.1
apical membrane antigen 1 [Plasmodium falciparum]	Plasmodium f...	malaria para...	5833	294	294	1	4e-97	93.38	594	ACR49744.1
apical membrane antigen 1 [Plasmodium falciparum]	Plasmodium f...	malaria para...	5833	294	294	1	4e-97	92.72	594	ACR49710.1
apical membrane antigen 1 [Plasmodium falciparum]	Plasmodium f...	malaria para...	5833	294	294	1	4e-97	92.72	594	ACR49707.1
apical membrane antigen 1 [Plasmodium falciparum]	Plasmodium f...	malaria para...	5833	294	294	1	4e-97	92.72	594	ACR49751.1
apical membrane antigen 1 [Plasmodium falciparum]	Plasmodium f...	malaria para...	5833	294	294	1	4e-97	92.72	594	ACR49741.1
apical membrane antigen 1 [Plasmodium falciparum]	Plasmodium f...	malaria para...	5833	295	295	1	4e-97	93.38	622	BAM85367.1
apical membrane antigen 1 [Plasmodium falciparum]	Plasmodium f...	malaria para...	5833	295	295	1	4e-97	93.38	622	BCL11734.1
apical membrane antigen 1 [Plasmodium falciparum]	Plasmodium f...	malaria para...	5833	294	294	1	4e-97	92.72	594	ACR49685.1
apical membrane antigen-1 [Plasmodium falciparum]	Plasmodium f...	malaria para...	5833	295	295	1	4e-97	93.38	622	ANS58285.1
apical membrane antigen 1 [Plasmodium falciparum]	Plasmodium f...	malaria para...	5833	292	292	1	4e-97	92.05	519	AHI17026.1
apical membrane antigen 1 [Plasmodium falciparum]	Plasmodium f...	malaria para...	5833	292	292	1	4e-97	92.05	519	AHI16998.1
apical membrane antigen 1 [Plasmodium falciparum]	Plasmodium f...	malaria para...	5833	294	294	1	4e-97	92.72	594	ACR49705.1
apical membrane antigen 1 [Plasmodium falciparum]	Plasmodium f...	malaria para...	5833	292	292	1	4e-97	92.05	526	CAB97183.1
apical membrane antigen 1 [Plasmodium falciparum]	Plasmodium f...	malaria para...	5833	295	295	1	4e-97	92.72	622	USU92746.1
apical membrane antigen 1 [Plasmodium reichenowi]	Plasmodium r...	NA	5854	295	295	1	4e-97	90.07	605	CAB66387.1
apical membrane antigen 1 [Plasmodium falciparum]	Plasmodium f...	malaria para...	5833	295	295	1	4e-97	92.72	614	AFM28856.1
apical membrane antigen 1 [Plasmodium falciparum]	Plasmodium f...	malaria para...	5833	292	292	1	4e-97	92.05	520	AFM28719.1
apical membrane antigen 1 [Plasmodium falciparum]	Plasmodium f...	malaria para...	5833	295	295	1	4e-97	93.38	622	BAM85516.1
apical membrane antigen 1 [Plasmodium falciparum]	Plasmodium f...	malaria para...	5833	295	295	1	4e-97	92.72	622	USU92735.1
apical membrane antigen-1 [Plasmodium falciparum]	Plasmodium f...	malaria para...	5833	295	295	1	5e-97	93.38	622	AAG50132.1
apical membrane antigen 1 [Plasmodium falciparum]	Plasmodium f...	malaria para...	5833	292	292	1	5e-97	92.72	520	AFM28585.1
apical membrane antigen 1 [Plasmodium falciparum]	Plasmodium f...	malaria para...	5833	295	295	1	5e-97	92.72	610	AFM28857.1
apical membrane antigen 1 [Plasmodium falciparum]	Plasmodium f...	malaria para...	5833	295	295	1	5e-97	92.72	622	ACB87868.1
apical membrane antigen 1 [Plasmodium falciparum]	Plasmodium f...	malaria para...	5833	294	294	1	5e-97	93.38	598	AFM28689.1
apical membrane antigen 1 [Plasmodium falciparum]	Plasmodium f...	malaria para...	5833	295	295	1	5e-97	93.38	622	BCL11773.1
apical membrane antigen 1 [Plasmodium falciparum]	Plasmodium f...	malaria para...	5833	295	295	1	5e-97	92.72	622	ACB87854.1
apical membrane antigen 1 [Plasmodium falciparum]	Plasmodium f...	malaria para...	5833	295	295	1	5e-97	93.38	622	ACB87807.1
apical membrane antigen 1 [Plasmodium falciparum]	Plasmodium f...	malaria para...	5833	291	291	1	5e-97	92.72	520	AFM28609.1
apical membrane antigen 1 [Plasmodium falciparum]	Plasmodium f...	malaria para...	5833	295	295	1	5e-97	92.72	622	ACB87835.1
apical membrane antigen 1 [Plasmodium falciparum]	Plasmodium f...	malaria para...	5833	295	295	1	5e-97	93.38	622	BAM85592.1
apical membrane antigen 1 [Plasmodium falciparum]	Plasmodium f...	malaria para...	5833	295	295	1	5e-97	92.72	622	BAM85596.1
apical membrane antigen 1 [Plasmodium falciparum]	Plasmodium f...	malaria para...	5833	291	291	1	6e-97	91.39	520	AFM28598.1
apical membrane antigen 1 [Plasmodium falciparum]	Plasmodium f...	malaria para...	5833	295	295	1	6e-97	92.72	622	ACB87844.1
apical membrane antigen 1 [Plasmodium falciparum]	Plasmodium f...	malaria para...	5833	295	295	1	6e-97	92.72	622	ACB87867.1
apical membrane antigen 1 [Plasmodium falciparum]	Plasmodium f...	malaria para...	5833	295	295	1	6e-97	93.38	622	BAM85374.1
apical membrane antigen 1 [Plasmodium falciparum]	Plasmodium f...	malaria para...	5833	295	295	1	6e-97	92.72	622	ACB87820.1
apical membrane antigen 1 [Plasmodium falciparum]	Plasmodium f...	malaria para...	5833	295	295	1	6e-97	92.72	622	ACB87838.1
apical membrane antigen 1 [Plasmodium falciparum]	Plasmodium f...	malaria para...	5833	295	295	1	6e-97	92.72	622	BAM85542.1
apical membrane antigen 1 [Plasmodium falciparum]	Plasmodium f...	malaria para...	5833	293	293	1	6e-97	91.39	569	AMM75864.1
apical membrane antigen 1 [Plasmodium falciparum]	Plasmodium f...	malaria para...	5833	295	295	1	6e-97	93.38	622	ACB87822.1
apical membrane antigen 1 [Plasmodium falciparum]	Plasmodium f...	malaria para...	5833	295	295	1	6e-97	92.72	622	ACB87825.1
apical membrane antigen 1 [Plasmodium falciparum]	Plasmodium f...	malaria para...	5833	294	294	1	7e-97	93.38	616	AXN69763.1
apical membrane antigen-1 [Plasmodium falciparum]	Plasmodium f...	malaria para...	5833	294	294	1	7e-97	92.72	622	ANS58302.1
apical membrane antigen 1 [Plasmodium falciparum]	Plasmodium f...	malaria para...	5833	294	294	1	7e-97	92.72	622	USU92738.1
apical membrane antigen 1 [Plasmodium falciparum]	Plasmodium f...	malaria para...	5833	294	294	1	7e-97	92.72	622	BAV14246.1
Chain A, Apical membrane antigen 1 [Plasmodium falciparum...	Plasmodium f...	NA	1036723	286	286	1	7e-97	90.73	371	5NQF_A
apical membrane antigen 1 [Plasmodium falciparum]	Plasmodium f...	malaria para...	5833	294	294	1	7e-97	92.72	622	BCL11757.1
apical membrane antigen 1 [Plasmodium falciparum]	Plasmodium f...	malaria para...	5833	294	294	1	7e-97	92.72	622	ACB87848.1
apical membrane antigen-1 [Plasmodium falciparum IGH-CR14]	Plasmodium f...	NA	580059	294	294	1	7e-97	92.72	622	KNG77083.1
apical membrane antigen 1 [Plasmodium falciparum]	Plasmodium f...	malaria para...	5833	294	294	1	7e-97	92.72	622	BAM85456.1
apical membrane antigen 1 [Plasmodium falciparum]	Plasmodium f...	malaria para...	5833	293	293	1	7e-97	91.39	594	ACR49656.1
apical membrane antigen 1 [Plasmodium falciparum]	Plasmodium f...	malaria para...	5833	294	294	1	8e-97	92.72	622	ACB87756.1
apical membrane antigen 1 [Plasmodium falciparum]	Plasmodium f...	malaria para...	5833	294	294	1	8e-97	92.72	622	ACB87767.1
RecName: Full=Apical membrane antigen 1; AltName: Full=Merozoi...	Plasmodium f...	NA	5835	294	294	1	8e-97	92.72	622	P50489.1
apical membrane antigen 1 [Plasmodium falciparum]	Plasmodium f...	malaria para...	5833	294	294	1	8e-97	92.72	622	USU92731.1
apical membrane antigen 1 [Plasmodium falciparum]	Plasmodium f...	malaria para...	5833	293	293	1	8e-97	92.72	578	ACA24144.1
apical membrane antigen 1 [Plasmodium falciparum]	Plasmodium f...	malaria para...	5833	294	294	1	8e-97	92.72	622	BAM85394.1
apical membrane antigen 1 [Plasmodium falciparum]	Plasmodium f...	malaria para...	5833	294	294	1	8e-97	92.72	622	BAM85447.1
apical membrane antigen 1 [Plasmodium falciparum]	Plasmodium f...	malaria para...	5833	294	294	1	8e-97	92.72	622	BAM85387.1
apical membrane antigen 1 [Plasmodium falciparum]	Plasmodium f...	malaria para...	5833	291	291	1	8e-97	92.05	520	AFM28874.1
apical membrane antigen 1 [Plasmodium falciparum]	Plasmodium f...	malaria para...	5833	294	294	1	8e-97	92.05	622	BAV14291.1
apical membrane antigen 1 [Plasmodium falciparum]	Plasmodium f...	malaria para...	5833	294	294	1	8e-97	92.72	622	BAM85437.1
apical membrane antigen 1 [Plasmodium falciparum]	Plasmodium f...	malaria para...	5833	294	294	1	8e-97	92.72	622	ACB87772.1
apical membrane antigen 1 [Plasmodium falciparum]	Plasmodium f...	malaria para...	5833	293	293	1	8e-97	92.72	578	ACA24146.1
apical membrane antigen 1 [Plasmodium falciparum]	Plasmodium f...	malaria para...	5833	291	291	1	8e-97	92.05	520	AFM28544.1
apical membrane antigen-1 [Plasmodium falciparum]	Plasmodium f...	malaria para...	5833	294	294	1	8e-97	93.38	622	AAG50135.1
apical membrane antigen 1 [Plasmodium reichenowi]	Plasmodium r...	NA	5854	294	294	1	9e-97	90.07	622	SOV80263.1
apical membrane antigen-1 [Plasmodium falciparum]	Plasmodium f...	malaria para...	5833	294	294	1	9e-97	92.72	622	ANS58303.1
apical membrane antigen 1 [Plasmodium falciparum]	Plasmodium f...	malaria para...	5833	294	294	1	9e-97	92.05	622	BAM85385.1
apical membrane antigen-1 [Plasmodium falciparum]	Plasmodium f...	malaria para...	5833	294	294	1	1e-96	92.72	622	ANS58305.1
apical membrane antigen 1 [Plasmodium falciparum]	Plasmodium f...	malaria para...	5833	291	291	1	1e-96	92.72	526	CAB97198.1
apical membrane antigen 1 [Plasmodium falciparum]	Plasmodium f...	malaria para...	5833	294	294	1	1e-96	92.72	622	BAN59398.1
apical membrane antigen 1 [Plasmodium falciparum]	Plasmodium f...	malaria para...	5833	291	291	1	1e-96	92.05	520	AFM28724.1
apical membrane antigen 1 [Plasmodium falciparum]	Plasmodium f...	malaria para...	5833	294	294	1	1e-96	93.38	622	USU92732.1
apical membrane antigen 1 [Plasmodium falciparum]	Plasmodium f...	malaria para...	5833	291	291	1	1e-96	91.39	520	AFM28659.1
apical membrane antigen-1 [Plasmodium falciparum]	Plasmodium f...	malaria para...	5833	294	294	1	1e-96	93.38	622	UIH11183.1
apical membrane antigen 1 [Plasmodium falciparum]	Plasmodium f...	malaria para...	5833	294	294	1	1e-96	92.05	622	BAM85395.1
apical membrane antigen 1 [Plasmodium falciparum]	Plasmodium f...	malaria para...	5833	293	293	1	1e-96	93.38	594	ACR49762.1
apical membrane antigen 1 [Plasmodium falciparum]	Plasmodium f...	malaria para...	5833	291	291	1	1e-96	92.05	520	AFM28858.1
apical membrane antigen 1 [Plasmodium falciparum]	Plasmodium f...	malaria para...	5833	294	294	1	1e-96	92.05	622	BAM85370.1
apical membrane antigen 1 [Plasmodium reichenowi]	Plasmodium r...	NA	5854	294	294	1	1e-96	90.07	622	CDO65136.1
apical membrane antigen 1 [Plasmodium reichenowi]	Plasmodium r...	NA	5854	294	294	1	1e-96	90.07	622	XP_012763735.2
truncated AMA-1 PF10 [Plasmodium falciparum]	Plasmodium f...	malaria para...	5833	292	292	1	1e-96	92.05	562	ABV02572.1
apical membrane antigen 1 [Plasmodium falciparum]	Plasmodium f...	malaria para...	5833	294	294	1	1e-96	92.05	622	BAM85636.1
apical membrane antigen-1 [Plasmodium falciparum]	Plasmodium f...	malaria para...	5833	293	293	1	1e-96	92.05	580	AIR08624.1
apical membrane antigen 1 [Plasmodium falciparum]	Plasmodium f...	malaria para...	5833	293	293	1	1e-96	91.39	622	ACB87861.1
apical membrane antigen 1 [Plasmodium falciparum]	Plasmodium f...	malaria para...	5833	293	293	1	1e-96	92.72	616	AXN69780.1
apical membrane antigen 1 [Plasmodium falciparum]	Plasmodium f...	malaria para...	5833	290	290	1	2e-96	92.05	520	AFM28837.1
apical membrane antigen 1 [Plasmodium falciparum]	Plasmodium f...	malaria para...	5833	280	280	1	2e-96	90.07	210	AMP83632.1
apical membrane antigen 1 [Plasmodium falciparum]	Plasmodium f...	malaria para...	5833	293	293	1	2e-96	92.05	594	ACR49693.1
apical membrane antigen 1 [Plasmodium falciparum]	Plasmodium f...	malaria para...	5833	292	292	1	2e-96	92.72	582	AMM75886.1
apical membrane antigen 1 [Plasmodium falciparum]	Plasmodium f...	malaria para...	5833	293	293	1	2e-96	92.05	622	BAM85375.1
apical membrane antigen-1 [Plasmodium falciparum]	Plasmodium f...	malaria para...	5833	293	293	1	2e-96	93.38	622	ANS58262.1
apical membrane antigen 1 [Plasmodium falciparum]	Plasmodium f...	malaria para...	5833	290	290	1	2e-96	91.39	519	AHI17001.1
apical membrane antigen-1 [Plasmodium falciparum]	Plasmodium f...	malaria para...	5833	293	293	1	2e-96	92.72	622	AAG50123.1
apical membrane antigen-1 [Plasmodium falciparum]	Plasmodium f...	malaria para...	5833	293	293	1	2e-96	92.72	622	AAG50124.1
apical membrane antigen-1 [Plasmodium falciparum]	Plasmodium f...	malaria para...	5833	293	293	1	2e-96	92.05	622	AAG50139.1
apical membrane antigen-1 [Plasmodium falciparum]	Plasmodium f...	malaria para...	5833	293	293	1	2e-96	92.72	622	AAG50129.1
apical membrane antigen 1 [Plasmodium falciparum]	Plasmodium f...	malaria para...	5833	293	293	1	2e-96	92.05	594	ACR49677.1
apical membrane antigen 1 [Plasmodium falciparum]	Plasmodium f...	malaria para...	5833	280	280	1	2e-96	89.4	210	AMP83961.1
apical membrane antigen 1 [Plasmodium falciparum]	Plasmodium f...	malaria para...	5833	293	293	1	2e-96	92.05	616	AXN69744.1
apical membrane antigen 1 [Plasmodium falciparum]	Plasmodium f...	malaria para...	5833	292	292	1	2e-96	91.39	568	AMM75883.1
apical membrane antigen 1 [Plasmodium falciparum]	Plasmodium f...	malaria para...	5833	280	280	1	2e-96	89.4	210	AMP83669.1
apical membrane antigen-1 [Plasmodium falciparum]	Plasmodium f...	malaria para...	5833	293	293	1	2e-96	92.72	622	AAG50127.1
apical membrane antigen 1 [Plasmodium falciparum]	Plasmodium f...	malaria para...	5833	293	293	1	2e-96	92.72	622	BCL11730.1
RecName: Full=Apical membrane antigen 1; AltName: Full=Merozoi...	Plasmodium f...	NA	57266	293	293	1	2e-96	92.72	622	P50492.1
apical membrane antigen 1 [Plasmodium falciparum]	Plasmodium f...	malaria para...	5833	293	293	1	2e-96	92.72	622	ABN12123.1
apical membrane antigen 1 [Plasmodium falciparum]	Plasmodium f...	malaria para...	5833	290	290	1	2e-96	92.72	520	AFM28533.1
apical membrane antigen 1 [Plasmodium falciparum]	Plasmodium f...	malaria para...	5833	292	292	1	2e-96	92.72	594	ACR49675.1
apical membrane antigen 1 [Plasmodium falciparum]	Plasmodium f...	malaria para...	5833	290	290	1	2e-96	92.72	520	AFM28804.1
apical membrane antigen 1 [Plasmodium falciparum]	Plasmodium f...	malaria para...	5833	290	290	1	2e-96	92.72	520	AFM28779.1
apical membrane antigen 1 [Plasmodium falciparum]	Plasmodium f...	malaria para...	5833	290	290	1	2e-96	92.72	520	AFM28745.1
apical membrane antigen 1 [Plasmodium falciparum]	Plasmodium f...	malaria para...	5833	290	290	1	2e-96	92.72	520	AFM28932.1
apical membrane antigen 1 [Plasmodium falciparum]	Plasmodium f...	malaria para...	5833	293	293	1	2e-96	92.72	622	BAM85421.1
apical membrane antigen-1 [Plasmodium falciparum]	Plasmodium f...	malaria para...	5833	293	293	1	3e-96	92.05	622	ANS58274.1
apical membrane antigen 1 [Plasmodium falciparum]	Plasmodium f...	malaria para...	5833	290	290	1	3e-96	92.72	520	AFM28516.1
apical membrane antigen 1 [Plasmodium falciparum]	Plasmodium f...	malaria para...	5833	290	290	1	3e-96	92.72	520	AFM28800.1
apical membrane antigen 1 [Plasmodium falciparum]	Plasmodium f...	malaria para...	5833	290	290	1	3e-96	92.72	520	AFM28560.1
apical membrane antigen-1 [Plasmodium falciparum]	Plasmodium f...	malaria para...	5833	293	293	1	3e-96	92.72	622	AAG50144.1
apical membrane antigen 1 [Plasmodium falciparum]	Plasmodium f...	malaria para...	5833	293	293	1	3e-96	92.05	622	ACB87762.1
apical membrane antigen 1 [Plasmodium falciparum]	Plasmodium f...	malaria para...	5833	293	293	1	3e-96	92.05	622	ACB87774.1
apical membrane antigen 1 [Plasmodium falciparum]	Plasmodium f...	malaria para...	5833	292	292	1	3e-96	92.72	594	ACR49746.1
apical membrane antigen 1 [Plasmodium falciparum]	Plasmodium f...	malaria para...	5833	290	290	1	3e-96	91.39	520	AFM28527.1
apical membrane antigen 1 [Plasmodium falciparum]	Plasmodium f...	malaria para...	5833	290	290	1	3e-96	92.05	520	AFM28818.1
apical membrane antigen 1 [Plasmodium falciparum]	Plasmodium f...	malaria para...	5833	290	290	1	3e-96	91.39	520	AFM28592.1
apical membrane antigen 1 [Plasmodium falciparum]	Plasmodium f...	malaria para...	5833	290	290	1	3e-96	92.72	520	AFM28842.1
apical membrane antigen 1 [Plasmodium falciparum]	Plasmodium f...	malaria para...	5833	290	290	1	3e-96	92.72	520	AFM28642.1
apical membrane antigen 1 [Plasmodium falciparum]	Plasmodium f...	malaria para...	5833	291	291	1	4e-96	92.05	573	AMM75874.1
apical membrane antigen 1 [Plasmodium falciparum]	Plasmodium f...	malaria para...	5833	292	292	1	4e-96	92.05	622	ACB87791.1
apical membrane antigen 1 [Plasmodium falciparum]	Plasmodium f...	malaria para...	5833	291	291	1	4e-96	91.39	594	ACR49740.1
apical membrane antigen 1 [Plasmodium falciparum]	Plasmodium f...	malaria para...	5833	291	291	1	4e-96	92.05	594	ACR49725.1
apical membrane antigen 1 [Plasmodium falciparum]	Plasmodium f...	malaria para...	5833	289	289	1	5e-96	91.39	514	AMM75891.1
apical membrane antigen 1 [Plasmodium falciparum]	Plasmodium f...	malaria para...	5833	292	292	1	5e-96	92.05	622	ACB87809.1
apical membrane antigen 1 [Plasmodium falciparum]	Plasmodium f...	malaria para...	5833	292	292	1	5e-96	92.05	622	ACB87833.1
apical membrane antigen 1 [Plasmodium falciparum]	Plasmodium f...	malaria para...	5833	289	289	1	5e-96	91.39	520	AFM28636.1
apical membrane antigen 1 [Plasmodium falciparum]	Plasmodium f...	malaria para...	5833	292	292	1	5e-96	92.72	622	BCL11720.1
apical membrane antigen 1 [Plasmodium falciparum]	Plasmodium f...	malaria para...	5833	291	291	1	5e-96	92.05	594	ACR49712.1
apical membrane antigen 1 [Plasmodium falciparum]	Plasmodium f...	malaria para...	5833	292	292	1	5e-96	92.05	622	BAV14255.1
apical membrane antigen 1 [Plasmodium falciparum]	Plasmodium f...	malaria para...	5833	292	292	1	5e-96	92.05	622	ACB87890.1
apical membrane antigen 1 [Plasmodium falciparum]	Plasmodium f...	malaria para...	5833	292	292	1	6e-96	92.05	622	BAM85571.1
apical membrane antigen 1 [Plasmodium falciparum]	Plasmodium f...	malaria para...	5833	292	292	1	6e-96	92.05	622	BAM85608.1
apical membrane antigen-1 [Plasmodium falciparum]	Plasmodium f...	malaria para...	5833	292	292	1	6e-96	92.72	622	ANS58312.1
apical membrane antigen 1 [Plasmodium falciparum]	Plasmodium f...	malaria para...	5833	292	292	1	6e-96	92.72	622	BCL11750.1
apical membrane antigen 1 [Plasmodium falciparum]	Plasmodium f...	malaria para...	5833	292	292	1	6e-96	92.05	622	ACB87891.1
apical membrane antigen 1 [Plasmodium falciparum]	Plasmodium f...	malaria para...	5833	289	289	1	6e-96	90.73	520	AFM28569.1
apical membrane antigen 1 [Plasmodium falciparum]	Plasmodium f...	malaria para...	5833	292	292	1	6e-96	91.39	622	ACB87766.1
apical membrane antigen 1 [Plasmodium falciparum]	Plasmodium f...	malaria para...	5833	292	292	1	6e-96	92.05	622	BAM85665.1
apical membrane antigen 1 [Plasmodium falciparum]	Plasmodium f...	malaria para...	5833	292	292	1	6e-96	92.05	622	BAM85711.1
apical membrane antigen 1 [Plasmodium falciparum]	Plasmodium f...	malaria para...	5833	289	289	1	6e-96	91.39	520	AFM28962.1
apical membrane antigen-1 [Plasmodium falciparum]	Plasmodium f...	malaria para...	5833	292	292	1	7e-96	92.05	622	AAG50138.1
apical membrane antigen 1 [Plasmodium falciparum]	Plasmodium f...	malaria para...	5833	289	289	1	7e-96	91.39	519	AHI16992.1
apical membrane antigen 1 [Plasmodium falciparum]	Plasmodium f...	malaria para...	5833	292	292	1	7e-96	92.72	622	BCL11733.1
apical membrane antigen 1 [Plasmodium falciparum]	Plasmodium f...	malaria para...	5833	292	292	1	7e-96	92.05	622	BAV14258.1
apical membrane antigen 1 [Plasmodium falciparum]	Plasmodium f...	malaria para...	5833	289	289	1	7e-96	91.39	520	AFM28845.1
apical membrane antigen 1 [Plasmodium falciparum]	Plasmodium f...	malaria para...	5833	292	292	1	7e-96	92.05	622	BAV14276.1
apical membrane antigen 1 [Plasmodium falciparum]	Plasmodium f...	malaria para...	5833	292	292	1	7e-96	92.05	622	BAV14278.1
apical membrane antigen 1 [Plasmodium falciparum]	Plasmodium f...	malaria para...	5833	291	291	1	8e-96	92.05	594	ACR49734.1
apical membrane antigen 1 [Plasmodium falciparum]	Plasmodium f...	malaria para...	5833	289	289	1	8e-96	91.39	519	AHI17048.1
apical membrane antigen 1 [Plasmodium falciparum]	Plasmodium f...	malaria para...	5833	291	291	1	8e-96	92.05	622	BAV14266.1
apical membrane antigen 1 [Plasmodium falciparum]	Plasmodium f...	malaria para...	5833	289	289	1	8e-96	91.39	520	AFM28687.1
apical membrane antigen 1 [Plasmodium falciparum]	Plasmodium f...	malaria para...	5833	291	291	1	8e-96	92.05	622	BCL11764.1
apical membrane antigen 1 [Plasmodium falciparum]	Plasmodium f...	malaria para...	5833	291	291	1	8e-96	92.05	622	BCL11725.1
apical membrane antigen 1 [Plasmodium falciparum]	Plasmodium f...	malaria para...	5833	289	289	1	8e-96	91.39	520	AFM28521.1
apical membrane antigen 1 [Plasmodium falciparum]	Plasmodium f...	malaria para...	5833	289	289	1	8e-96	91.39	520	AFM28743.1
apical membrane antigen 1 [Plasmodium falciparum]	Plasmodium f...	malaria para...	5833	289	289	1	8e-96	91.39	520	AFM28698.1
apical membrane antigen 1 [Plasmodium falciparum]	Plasmodium f...	malaria para...	5833	289	289	1	8e-96	91.39	520	AFM28778.1
apical membrane antigen 1 [Plasmodium falciparum]	Plasmodium f...	malaria para...	5833	291	291	1	8e-96	92.05	622	BAV14275.1
apical membrane antigen 1 [Plasmodium falciparum]	Plasmodium f...	malaria para...	5833	289	289	1	8e-96	91.39	520	AFM28930.1
apical membrane antigen-1 [Plasmodium falciparum]	Plasmodium f...	malaria para...	5833	291	291	1	8e-96	92.05	622	AAG50128.1
apical membrane antigen 1 [Plasmodium falciparum]	Plasmodium f...	malaria para...	5833	288	288	1	9e-96	91.39	520	AFM28618.1
apical membrane antigen 1 [Plasmodium falciparum]	Plasmodium f...	malaria para...	5833	289	289	1	9e-96	91.39	545	AGL76296.1
apical membrane antigen 1 [Plasmodium falciparum]	Plasmodium f...	malaria para...	5833	291	291	1	1e-95	91.39	622	BAM85378.1
apical membrane antigen 1 [Plasmodium falciparum]	Plasmodium f...	malaria para...	5833	291	291	1	1e-95	92.05	622	BAM85545.1
apical membrane antigen 1 [Plasmodium falciparum]	Plasmodium f...	malaria para...	5833	291	291	1	1e-95	92.05	622	ACB87803.1
apical membrane antigen 1 [Plasmodium falciparum]	Plasmodium f...	malaria para...	5833	291	291	1	1e-95	91.39	622	BAM85412.1
apical membrane antigen-1 [Plasmodium falciparum]	Plasmodium f...	malaria para...	5833	290	290	1	1e-95	91.39	580	AIR08626.1
apical membrane antigen 1 [Plasmodium falciparum]	Plasmodium f...	malaria para...	5833	291	291	1	1e-95	92.05	622	BAM85620.1
apical membrane antigen 1 [Plasmodium falciparum]	Plasmodium f...	malaria para...	5833	281	281	1	1e-95	88.74	292	AMM75858.1
apical membrane antigen 1 [Plasmodium falciparum]	Plasmodium f...	malaria para...	5833	291	291	1	1e-95	92.05	622	ACB87821.1
apical membrane antigen 1 [Plasmodium falciparum]	Plasmodium f...	malaria para...	5833	291	291	1	1e-95	92.05	622	ACB87840.1
apical membrane antigen 1 [Plasmodium falciparum]	Plasmodium f...	malaria para...	5833	289	289	1	1e-95	92.05	545	AGL76287.1
apical membrane antigen 1 [Plasmodium falciparum]	Plasmodium f...	malaria para...	5833	291	291	1	1e-95	91.39	622	BCL11787.1
apical membrane antigen 1 [Plasmodium falciparum]	Plasmodium f...	malaria para...	5833	288	288	1	1e-95	91.39	520	AFM28988.1
apical membrane antigen 1 [Plasmodium falciparum]	Plasmodium f...	malaria para...	5833	291	291	1	1e-95	91.39	622	BAV14293.1
apical membrane antigen 1 [Plasmodium falciparum]	Plasmodium f...	malaria para...	5833	290	290	1	1e-95	92.05	594	ACR49738.1
apical membrane antigen 1 [Plasmodium falciparum]	Plasmodium f...	malaria para...	5833	288	288	1	2e-95	91.39	520	AFM28812.1
apical membrane antigen 1 [Plasmodium falciparum]	Plasmodium f...	malaria para...	5833	288	288	1	2e-95	91.39	520	AFM28870.1
apical membrane antigen 1 [Plasmodium falciparum]	Plasmodium f...	malaria para...	5833	288	288	1	2e-95	91.39	515	AMM75863.1
apical membrane antigen-1 [Plasmodium falciparum]	Plasmodium f...	malaria para...	5833	291	291	1	2e-95	92.05	622	ANS58270.1
apical membrane antigen 1 [Plasmodium falciparum]	Plasmodium f...	malaria para...	5833	290	290	1	2e-95	92.72	594	ACR49721.1
apical membrane antigen 1 [Plasmodium falciparum]	Plasmodium f...	malaria para...	5833	288	288	1	2e-95	91.39	520	AFM28641.1
apical membrane antigen 1 [Plasmodium falciparum]	Plasmodium f...	malaria para...	5833	288	288	1	2e-95	91.39	520	AFM28836.1
Chain A, APICAL MEMBRANE ANTIGEN 1 [Plasmodium falciparum]	Plasmodium f...	malaria para...	5833	290	290	1	2e-95	91.39	581	2J5L_A
apical membrane antigen 1 [Plasmodium falciparum]	Plasmodium f...	malaria para...	5833	288	288	1	2e-95	91.39	520	AFM28787.1
apical membrane antigen 1 [Plasmodium falciparum]	Plasmodium f...	malaria para...	5833	290	290	1	2e-95	92.72	594	ACR49657.1
apical membrane antigen 1 [Plasmodium falciparum]	Plasmodium f...	malaria para...	5833	291	291	1	2e-95	91.39	622	ACB87850.1
apical membrane antigen 1 [Plasmodium falciparum]	Plasmodium f...	malaria para...	5833	291	291	1	2e-95	91.39	622	ACB87888.1
apical membrane antigen 1 [Plasmodium falciparum]	Plasmodium f...	malaria para...	5833	290	290	1	2e-95	92.05	594	ACR49698.1
apical membrane antigen 1 [Plasmodium falciparum]	Plasmodium f...	malaria para...	5833	288	288	1	2e-95	91.39	520	AFM28658.1
apical membrane antigen 1 [Plasmodium falciparum]	Plasmodium f...	malaria para...	5833	288	288	1	2e-95	91.39	520	AFM28634.1
apical membrane antigen 1 [Plasmodium falciparum]	Plasmodium f...	malaria para...	5833	290	290	1	2e-95	91.39	622	BCL11759.1
apical membrane antigen 1 [Plasmodium falciparum]	Plasmodium f...	malaria para...	5833	290	290	1	2e-95	91.39	594	ACR49658.1
apical membrane antigen 1 [Plasmodium falciparum]	Plasmodium f...	malaria para...	5833	288	288	1	2e-95	91.39	520	AFM28577.1
apical membrane antigen 1 [Plasmodium falciparum]	Plasmodium f...	malaria para...	5833	290	290	1	2e-95	92.05	622	BAV14285.1
apical membrane antigen-1 [Plasmodium falciparum]	Plasmodium f...	malaria para...	5833	289	289	1	2e-95	91.39	580	AIR08620.1
apical membrane antigen 1 [Plasmodium falciparum]	Plasmodium f...	malaria para...	5833	282	282	1	2e-95	89.4	352	AMM75846.1
apical membrane antigen 1 [Plasmodium falciparum]	Plasmodium f...	malaria para...	5833	290	290	1	3e-95	92.05	622	ACB87853.1
apical membrane antigen 1 [Plasmodium falciparum]	Plasmodium f...	malaria para...	5833	287	287	1	3e-95	91.39	519	AHI17056.1
apical membrane antigen 1 [Plasmodium falciparum]	Plasmodium f...	malaria para...	5833	290	290	1	3e-95	92.05	622	BAM85415.1
apical membrane antigen 1 [Plasmodium falciparum]	Plasmodium f...	malaria para...	5833	290	290	1	3e-95	92.05	622	BAV14295.1
apical membrane antigen 1 [Plasmodium falciparum]	Plasmodium f...	malaria para...	5833	290	290	1	3e-95	92.05	622	BAM85625.1
apical membrane antigen 1 [Plasmodium falciparum]	Plasmodium f...	malaria para...	5833	289	289	1	3e-95	91.39	594	ACR49730.1
apical membrane antigen 1 [Plasmodium falciparum]	Plasmodium f...	malaria para...	5833	282	282	1	4e-95	89.4	372	AMM75854.1
apical membrane antigen-1 [Plasmodium falciparum]	Plasmodium f...	malaria para...	5833	290	290	1	4e-95	91.39	622	AAG50126.1
apical membrane antigen 1 [Plasmodium falciparum]	Plasmodium f...	malaria para...	5833	290	290	1	4e-95	91.39	605	CAC05390.1
apical membrane antigen 1 [Plasmodium falciparum]	Plasmodium f...	malaria para...	5833	288	288	1	4e-95	91.39	554	AFM28859.1
apical membrane antigen 1 [Plasmodium falciparum]	Plasmodium f...	malaria para...	5833	290	290	1	4e-95	92.72	622	BAM85441.1
apical membrane antigen 1 [Plasmodium falciparum]	Plasmodium f...	malaria para...	5833	290	290	1	4e-95	92.72	622	ACB87858.1
apical membrane antigen 1 [Plasmodium falciparum]	Plasmodium f...	malaria para...	5833	290	290	1	4e-95	92.72	622	ACB87832.1
apical membrane antigen 1 [Plasmodium falciparum]	Plasmodium f...	malaria para...	5833	287	287	1	4e-95	90.73	520	AFM28562.1
apical membrane antigen 1 [Plasmodium falciparum]	Plasmodium f...	malaria para...	5833	290	290	1	4e-95	91.39	622	ACB87761.1
apical membrane antigen 1 [Plasmodium falciparum]	Plasmodium f...	malaria para...	5833	290	290	1	5e-95	92.05	622	BAM85364.1
apical membrane antigen 1 [Plasmodium falciparum]	Plasmodium f...	malaria para...	5833	287	287	1	5e-95	90.73	520	AFM28875.1
apical membrane antigen 1 [Plasmodium falciparum]	Plasmodium f...	malaria para...	5833	290	290	1	5e-95	91.39	622	BCL11738.1
apical membrane antigen 1 [Plasmodium falciparum]	Plasmodium f...	malaria para...	5833	290	290	1	5e-95	91.39	616	AXN69747.1
apical membrane antigen 1 [Plasmodium falciparum]	Plasmodium f...	malaria para...	5833	288	288	1	5e-95	90.73	554	AFM28883.1
apical membrane antigen 1 [Plasmodium falciparum]	Plasmodium f...	malaria para...	5833	290	290	1	5e-95	91.39	622	BCL11760.1
apical membrane antigen 1 [Plasmodium falciparum]	Plasmodium f...	malaria para...	5833	286	286	1	5e-95	90.73	520	AFM28869.1
apical membrane antigen 1 [Plasmodium falciparum]	Plasmodium f...	malaria para...	5833	289	289	1	5e-95	91.39	594	ACR49694.1
apical membrane antigen-1 [Plasmodium falciparum]	Plasmodium f...	malaria para...	5833	289	289	1	5e-95	91.39	592	AAC47109.1
apical membrane antigen 1 [Plasmodium falciparum]	Plasmodium f...	malaria para...	5833	289	289	1	6e-95	91.39	616	AFM28872.1
apical membrane antigen-1 [Plasmodium falciparum]	Plasmodium f...	malaria para...	5833	289	289	1	6e-95	91.39	604	AAC47106.1
apical membrane antigen 1 [Plasmodium falciparum]	Plasmodium f...	malaria para...	5833	289	289	1	6e-95	91.39	622	BAV14248.1
apical membrane antigen 1 [Plasmodium falciparum]	Plasmodium f...	malaria para...	5833	286	286	1	6e-95	90.73	520	AFM28866.1
apical membrane antigen 1 [Plasmodium falciparum]	Plasmodium f...	malaria para...	5833	289	289	1	6e-95	91.39	616	AXN69758.1
apical membrane antigen 1 [Plasmodium falciparum]	Plasmodium f...	malaria para...	5833	288	288	1	7e-95	91.39	573	AMM75869.1
apical membrane antigen-1 [Plasmodium falciparum]	Plasmodium f...	malaria para...	5833	289	289	1	7e-95	91.39	622	ANS58315.1
apical membrane antigen 1 [Plasmodium falciparum]	Plasmodium f...	malaria para...	5833	289	289	1	8e-95	91.39	622	ACB87901.1
apical membrane antigen 1 [Plasmodium falciparum]	Plasmodium f...	malaria para...	5833	289	289	1	8e-95	92.05	622	BAM85422.1
apical membrane antigen 1 [Plasmodium falciparum Santa Lucia]	Plasmodium f...	NA	478859	289	289	1	8e-95	91.39	622	EUT83566.1
apical membrane antigen 1 [Plasmodium falciparum]	Plasmodium f...	malaria para...	5833	289	289	1	8e-95	91.39	622	BAM85573.1
RecName: Full=Apical membrane antigen 1; AltName: Full=Merozoi...	Plasmodium f...	NA	5838	289	289	1	8e-95	91.39	622	P50490.1
apical membrane antigen-1 [Plasmodium falciparum]	Plasmodium f...	malaria para...	5833	289	289	1	8e-95	91.39	622	ANS58283.1
apical membrane antigen 1 [Plasmodium falciparum]	Plasmodium f...	malaria para...	5833	289	289	1	8e-95	91.39	622	BAM85653.1
apical membrane antigen 1 [Plasmodium falciparum]	Plasmodium f...	malaria para...	5833	289	289	1	8e-95	91.39	622	USU92733.1
apical membrane antigen-1 [Plasmodium falciparum]	Plasmodium f...	malaria para...	5833	289	289	1	8e-95	91.39	622	AAG50136.1
apical membrane antigen 1 [Plasmodium falciparum]	Plasmodium f...	malaria para...	5833	289	289	1	8e-95	91.39	616	AXN69756.1
apical membrane antigen-1 [Plasmodium falciparum]	Plasmodium f...	malaria para...	5833	289	289	1	9e-95	91.39	622	ANS58275.1
apical membrane antigen 1 [Plasmodium falciparum]	Plasmodium f...	malaria para...	5833	289	289	1	9e-95	91.39	622	BAM85602.1
apical membrane antigen 1 [Plasmodium falciparum]	Plasmodium f...	malaria para...	5833	289	289	1	9e-95	91.39	622	BAV14259.1
apical membrane antigen-1 [Plasmodium falciparum]	Plasmodium f...	malaria para...	5833	289	289	1	9e-95	91.39	621	AAD03790.1
apical membrane antigen 1 [Plasmodium falciparum]	Plasmodium f...	malaria para...	5833	286	286	1	1e-94	90.73	519	AHI17002.1
apical membrane antigen 1 [Plasmodium falciparum]	Plasmodium f...	malaria para...	5833	289	289	1	1e-94	91.39	622	BAV14272.1
apical membrane antigen 1 [Plasmodium falciparum]	Plasmodium f...	malaria para...	5833	289	289	1	1e-94	92.05	622	BAV14252.1
apical membrane antigen-1 [Plasmodium falciparum]	Plasmodium f...	malaria para...	5833	287	287	1	1e-94	90.73	580	AIR08625.1
apical membrane antigen 1 [Plasmodium falciparum]	Plasmodium f...	malaria para...	5833	288	288	1	1e-94	91.39	622	ACB87768.1
apical membrane antigen 1 [Plasmodium falciparum]	Plasmodium f...	malaria para...	5833	288	288	1	1e-94	91.39	622	ACB87896.1
apical membrane antigen 1 [Plasmodium falciparum]	Plasmodium f...	malaria para...	5833	288	288	1	2e-94	91.39	594	ACR49733.1
apical membrane antigen 1 [Plasmodium falciparum]	Plasmodium f...	malaria para...	5833	287	287	1	2e-94	90.73	575	AMM75870.1
apical membrane antigen 1 [Plasmodium falciparum]	Plasmodium f...	malaria para...	5833	285	285	1	2e-94	90.73	520	AFM28853.1
apical membrane antigen 1 [Plasmodium falciparum]	Plasmodium f...	malaria para...	5833	285	285	1	2e-94	90.73	520	AFM28591.1
apical membrane antigen 1 [Plasmodium falciparum]	Plasmodium f...	malaria para...	5833	285	285	1	2e-94	90.73	520	AFM28725.1
apical membrane antigen 1 [Plasmodium falciparum]	Plasmodium f...	malaria para...	5833	285	285	1	2e-94	90.73	520	AFM28762.1
apical membrane antigen 1 [Plasmodium falciparum]	Plasmodium f...	malaria para...	5833	285	285	1	2e-94	90.73	520	AFM28903.1
apical membrane antigen 1 [Plasmodium falciparum]	Plasmodium f...	malaria para...	5833	285	285	1	2e-94	90.73	520	AFM28637.1
apical membrane antigen 1 [Plasmodium falciparum]	Plasmodium f...	malaria para...	5833	285	285	1	2e-94	90.73	520	AFM28969.1
apical membrane antigen 1 [Plasmodium falciparum]	Plasmodium f...	malaria para...	5833	285	285	1	2e-94	90.73	520	AFM28670.1
apical membrane antigen 1 [Plasmodium falciparum]	Plasmodium f...	malaria para...	5833	285	285	1	2e-94	90.73	520	AFM28979.1
apical membrane antigen 1 [Plasmodium falciparum]	Plasmodium f...	malaria para...	5833	285	285	1	2e-94	90.73	520	AFM28887.1
apical membrane antigen 1 [Plasmodium falciparum]	Plasmodium f...	malaria para...	5833	285	285	1	2e-94	90.73	520	AFM28889.1
apical membrane antigen 1 [Plasmodium falciparum]	Plasmodium f...	malaria para...	5833	285	285	1	2e-94	90.73	520	AFM28518.1
apical membrane antigen 1 [Plasmodium falciparum]	Plasmodium f...	malaria para...	5833	285	285	1	2e-94	90.73	520	AFM28958.1
apical membrane antigen 1 [Plasmodium falciparum]	Plasmodium f...	malaria para...	5833	285	285	1	2e-94	90.73	520	AFM28840.1
apical membrane antigen 1 [Plasmodium falciparum]	Plasmodium f...	malaria para...	5833	285	285	1	2e-94	90.73	520	AFM28607.1
apical membrane antigen 1 [Plasmodium falciparum]	Plasmodium f...	malaria para...	5833	285	285	1	2e-94	90.73	520	AFM28727.1
apical membrane antigen 1 [Plasmodium falciparum]	Plasmodium f...	malaria para...	5833	288	288	1	3e-94	91.39	622	BAM85365.1
apical membrane antigen 1 [Plasmodium falciparum]	Plasmodium f...	malaria para...	5833	288	288	1	3e-94	91.39	622	ACB87851.1
apical membrane antigen 1 [Plasmodium falciparum]	Plasmodium f...	malaria para...	5833	286	286	1	3e-94	90.73	581	AMM75868.1
apical membrane antigen 1 [Plasmodium falciparum]	Plasmodium f...	malaria para...	5833	288	288	1	3e-94	91.39	622	ACB87839.1
apical membrane antigen 1 [Plasmodium falciparum]	Plasmodium f...	malaria para...	5833	288	288	1	3e-94	91.39	622	BAM85396.1
apical membrane antigen 1 [Plasmodium falciparum]	Plasmodium f...	malaria para...	5833	288	288	1	3e-94	91.39	622	ACB87846.1
apical membrane antigen 1 [Plasmodium falciparum]	Plasmodium f...	malaria para...	5833	285	285	1	3e-94	90.73	520	AFM28767.1
apical membrane antigen 1 [Plasmodium falciparum]	Plasmodium f...	malaria para...	5833	287	287	1	3e-94	90.73	594	ACR49670.1
apical membrane antigen 1 [Plasmodium falciparum]	Plasmodium f...	malaria para...	5833	285	285	1	3e-94	90.07	519	AHI17036.1
apical membrane antigen 1 [Plasmodium falciparum]	Plasmodium f...	malaria para...	5833	287	287	1	3e-94	90.73	622	BAV14286.1
apical membrane antigen 1 [Plasmodium falciparum]	Plasmodium f...	malaria para...	5833	286	286	1	3e-94	90.73	594	ACR49689.1
apical membrane antigen 1 [Plasmodium falciparum]	Plasmodium f...	malaria para...	5833	287	287	1	3e-94	91.39	622	BAM85446.1
apical membrane antigen 1 [Plasmodium falciparum]	Plasmodium f...	malaria para...	5833	287	287	1	4e-94	91.39	622	BAM85404.1
apical membrane antigen 1 [Plasmodium falciparum]	Plasmodium f...	malaria para...	5833	286	286	1	4e-94	91.39	594	ACR49720.1
apical membrane antigen 1 [Plasmodium falciparum]	Plasmodium f...	malaria para...	5833	286	286	1	4e-94	90.07	577	AMM75838.1
apical membrane antigen 1 [Plasmodium falciparum]	Plasmodium f...	malaria para...	5833	287	287	1	6e-94	91.39	622	BAV14242.1
apical membrane antigen 1 [Plasmodium falciparum]	Plasmodium f...	malaria para...	5833	284	284	1	6e-94	90.07	526	CAB97191.1
apical membrane antigen 1 [Plasmodium falciparum]	Plasmodium f...	malaria para...	5833	286	286	1	7e-94	90.73	622	ACB87898.1
apical membrane antigen 1 [Plasmodium falciparum]	Plasmodium f...	malaria para...	5833	286	286	1	7e-94	90.73	622	BAM85418.1
apical membrane antigen 1 [Plasmodium falciparum]	Plasmodium f...	malaria para...	5833	286	286	1	7e-94	90.73	622	BAM85359.1
apical membrane antigen 1 [Plasmodium falciparum]	Plasmodium f...	malaria para...	5833	284	284	1	7e-94	90.07	520	AFM28549.1
apical membrane antigen 1 [Plasmodium falciparum]	Plasmodium f...	malaria para...	5833	283	283	1	8e-94	90.73	520	AFM28542.1
apical membrane antigen 1 [Plasmodium falciparum]	Plasmodium f...	malaria para...	5833	286	286	1	8e-94	90.73	622	BAV14299.1
apical membrane antigen 1 [Plasmodium falciparum]	Plasmodium f...	malaria para...	5833	283	283	1	8e-94	90.73	520	AFM28823.1
apical membrane antigen 1 [Plasmodium falciparum]	Plasmodium f...	malaria para...	5833	283	283	1	9e-94	90.07	520	AFM28931.1
apical membrane antigen 1 [Plasmodium falciparum]	Plasmodium f...	malaria para...	5833	283	283	1	1e-93	90.07	526	CAB97196.1
apical membrane antigen 1 [Plasmodium falciparum]	Plasmodium f...	malaria para...	5833	283	283	1	1e-93	90.07	520	AFM28809.1
apical membrane antigen 1 [Plasmodium falciparum]	Plasmodium f...	malaria para...	5833	286	286	1	1e-93	90.73	622	BAM85381.1
apical membrane antigen 1 [Plasmodium falciparum]	Plasmodium f...	malaria para...	5833	286	286	1	1e-93	90.73	622	BAV14270.1
apical membrane antigen 1 [Plasmodium falciparum]	Plasmodium f...	malaria para...	5833	286	286	1	1e-93	90.73	622	BAM85626.1
apical membrane antigen 1 [Plasmodium falciparum]	Plasmodium f...	malaria para...	5833	285	285	1	1e-93	90.73	594	ACR49661.1
apical membrane antigen 1 [Plasmodium falciparum]	Plasmodium f...	malaria para...	5833	286	286	1	1e-93	90.73	622	ACB87758.1
apical membrane antigen 1 [Plasmodium falciparum]	Plasmodium f...	malaria para...	5833	285	285	1	1e-93	90.73	594	ACR49669.1
apical membrane antigen 1 [Plasmodium falciparum]	Plasmodium f...	malaria para...	5833	285	285	1	2e-93	90.73	594	ACR49717.1
apical membrane antigen 1 [Plasmodium falciparum]	Plasmodium f...	malaria para...	5833	286	286	1	2e-93	90.07	622	BCL11710.1
apical membrane antigen 1 [Plasmodium falciparum]	Plasmodium f...	malaria para...	5833	284	284	1	2e-93	89.4	575	AMM75880.1
apical membrane antigen 1 [Plasmodium falciparum]	Plasmodium f...	malaria para...	5833	285	285	1	3e-93	90.73	622	ACB87824.1
apical membrane antigen 1 [Plasmodium falciparum]	Plasmodium f...	malaria para...	5833	285	285	1	3e-93	90.73	622	ACB87781.1
apical membrane antigen 1 [Plasmodium falciparum]	Plasmodium f...	malaria para...	5833	285	285	1	3e-93	90.73	622	ACB87785.1
apical membrane antigen 1 [Plasmodium falciparum]	Plasmodium f...	malaria para...	5833	285	285	1	3e-93	90.73	622	BAM85455.1
apical membrane antigen 1 [Plasmodium falciparum]	Plasmodium f...	malaria para...	5833	285	285	1	3e-93	90.73	622	ACB87795.1
apical membrane antigen 1 [Plasmodium falciparum]	Plasmodium f...	malaria para...	5833	285	285	1	3e-93	90.73	622	BAM85431.1
apical membrane antigen 1 [Plasmodium falciparum]	Plasmodium f...	malaria para...	5833	285	285	1	3e-93	90.73	622	ACB87827.1
apical membrane antigen 1 [Plasmodium falciparum]	Plasmodium f...	malaria para...	5833	285	285	1	3e-93	90.73	622	BAM85433.1
apical membrane antigen 1 [Plasmodium falciparum]	Plasmodium f...	malaria para...	5833	285	285	1	3e-93	90.73	622	BCL11771.1
apical membrane antigen 1 [Plasmodium falciparum]	Plasmodium f...	malaria para...	5833	285	285	1	4e-93	90.73	622	BCL11744.1
apical membrane antigen 1 [Plasmodium falciparum]	Plasmodium f...	malaria para...	5833	282	282	1	4e-93	89.4	520	AFM28898.1
apical membrane antigen 1 [Plasmodium falciparum]	Plasmodium f...	malaria para...	5833	282	282	1	4e-93	90.07	520	AFM28651.1
apical membrane antigen 1 [Plasmodium falciparum]	Plasmodium f...	malaria para...	5833	282	282	1	4e-93	90.07	520	AFM28528.1
apical membrane antigen 1 [Plasmodium falciparum]	Plasmodium f...	malaria para...	5833	282	282	1	4e-93	90.07	520	AFM28949.1
apical membrane antigen 1 [Plasmodium falciparum]	Plasmodium f...	malaria para...	5833	282	282	1	4e-93	89.4	520	AFM28548.1
apical membrane antigen 1 [Plasmodium falciparum]	Plasmodium f...	malaria para...	5833	281	281	1	4e-93	90.07	520	AFM28839.1
apical membrane antigen 1 [Plasmodium falciparum]	Plasmodium f...	malaria para...	5833	281	281	1	5e-93	89.4	520	AFM28819.1
apical membrane antigen 1 [Plasmodium falciparum]	Plasmodium f...	malaria para...	5833	281	281	1	5e-93	89.4	520	AFM28555.1
apical membrane antigen 1 [Plasmodium falciparum]	Plasmodium f...	malaria para...	5833	281	281	1	5e-93	89.4	520	AFM28619.1
apical membrane antigen 1 [Plasmodium falciparum]	Plasmodium f...	malaria para...	5833	281	281	1	5e-93	90.07	520	AFM28795.1
apical membrane antigen 1 [Plasmodium falciparum]	Plasmodium f...	malaria para...	5833	281	281	1	6e-93	89.4	526	CAB97188.1
apical membrane antigen 1 [Plasmodium falciparum]	Plasmodium f...	malaria para...	5833	281	281	1	7e-93	89.4	520	AFM28759.1
apical membrane antigen 1 [Plasmodium falciparum]	Plasmodium f...	malaria para...	5833	283	283	1	7e-93	90.07	578	AMM75881.1
apical membrane antigen 1 [Plasmodium falciparum]	Plasmodium f...	malaria para...	5833	281	281	1	9e-93	90.07	543	AMM75841.1
apical membrane antigen 1 [Plasmodium falciparum]	Plasmodium f...	malaria para...	5833	283	283	1	1e-92	90.73	622	BCL11721.1
apical membrane antigen 1 [Plasmodium falciparum]	Plasmodium f...	malaria para...	5833	283	283	1	1e-92	90.07	622	ACB87845.1
apical membrane antigen 1 [Plasmodium falciparum]	Plasmodium f...	malaria para...	5833	283	283	1	2e-92	90.07	622	BCL11780.1
apical membrane antigen 1 [Plasmodium falciparum]	Plasmodium f...	malaria para...	5833	283	283	1	2e-92	90.07	622	BAV14254.1
apical membrane antigen 1 [Plasmodium falciparum]	Plasmodium f...	malaria para...	5833	280	280	1	2e-92	89.4	526	CAB97180.1
apical membrane antigen 1 [Plasmodium falciparum]	Plasmodium f...	malaria para...	5833	281	281	1	3e-92	89.4	565	AMM75876.1
apical membrane antigen 1 [Plasmodium falciparum]	Plasmodium f...	malaria para...	5833	282	282	1	3e-92	89.4	594	ACR49708.1
apical membrane antigen 1 [Plasmodium falciparum]	Plasmodium f...	malaria para...	5833	281	281	1	3e-92	90.07	594	ACR49701.1
apical membrane antigen 1 [Plasmodium falciparum]	Plasmodium f...	malaria para...	5833	281	281	1	3e-92	89.4	594	ACR49743.1
apical membrane antigen 1 [Plasmodium falciparum]	Plasmodium f...	malaria para...	5833	281	281	1	3e-92	88.74	568	AMM75873.1
apical membrane antigen 1 [Plasmodium falciparum]	Plasmodium f...	malaria para...	5833	282	282	1	4e-92	90.07	622	BAV14243.1
apical membrane antigen 1 [Plasmodium falciparum]	Plasmodium f...	malaria para...	5833	282	282	1	5e-92	90.07	622	BCL11732.1
apical membrane antigen 1 [Plasmodium falciparum]	Plasmodium f...	malaria para...	5833	282	282	1	5e-92	90.07	622	BAV14268.1
apical membrane antigen 1 [Plasmodium falciparum]	Plasmodium f...	malaria para...	5833	282	282	1	6e-92	90.07	622	BAV14251.1
apical membrane antigen 1 [Plasmodium falciparum]	Plasmodium f...	malaria para...	5833	282	282	1	6e-92	90.07	622	BCL11789.1
apical membrane antigen 1 [Plasmodium falciparum]	Plasmodium f...	malaria para...	5833	281	281	1	6e-92	90.07	622	BCL11762.1
apical membrane antigen 1 [Plasmodium falciparum]	Plasmodium f...	malaria para...	5833	281	281	1	6e-92	89.4	622	ACB87849.1
apical membrane antigen 1 [Plasmodium falciparum]	Plasmodium f...	malaria para...	5833	281	281	1	6e-92	89.4	622	ACB87860.1
apical membrane antigen 1 [Plasmodium falciparum]	Plasmodium f...	malaria para...	5833	281	281	1	6e-92	89.4	622	ACB87834.1
apical membrane antigen 1 [Plasmodium falciparum]	Plasmodium f...	malaria para...	5833	281	281	1	7e-92	90.07	622	BAM85432.1
apical membrane antigen 1 [Plasmodium falciparum]	Plasmodium f...	malaria para...	5833	281	281	1	7e-92	89.4	622	BAM85444.1
apical membrane antigen 1 [Plasmodium falciparum]	Plasmodium f...	malaria para...	5833	278	278	1	7e-92	88.08	519	AMM75860.1
apical membrane antigen 1 [Plasmodium falciparum]	Plasmodium f...	malaria para...	5833	281	281	1	8e-92	90.07	622	ACB87819.1
apical membrane antigen 1 [Plasmodium falciparum]	Plasmodium f...	malaria para...	5833	281	281	1	1e-91	89.4	622	BAM85369.1
apical membrane antigen 1 [Plasmodium falciparum]	Plasmodium f...	malaria para...	5833	281	281	1	1e-91	89.4	622	BCL11791.1
Chain A, Apical membrane antigen 1, rhoptry neck protein 2...	Plasmodium f...	NA	36329	272	272	1	2e-91	74.47	349	8GIE_A
apical membrane antigen 1 [Plasmodium falciparum]	Plasmodium f...	malaria para...	5833	263	263	1	2e-89	82.78	237	AMX81237.1
apical membrane antigen 1 [Plasmodium sp. DRC-Itaito]	Plasmodium s...	NA	720590	274	274	1	3e-89	82.78	591	SPJ11062.1
apical membrane antigen 1 [Plasmodium sp. gorilla clade G2]	Plasmodium s...	NA	880535	262	262	1	2e-84	76.82	634	XP_028539032.1
apical membrane antigen 1 [Plasmodium sp. gorilla clade G3]	Plasmodium s...	NA	880536	262	262	1	3e-84	80.13	628	SOV78185.1
apical membrane antigen 1 [Plasmodium gaboni]	Plasmodium g...	NA	647221	260	260	1	8e-84	78.15	610	XP_018641247.1
apical membrane antigen 1 [Plasmodium sp. DRC-Itaito]	Plasmodium s...	NA	720590	260	260	1	8e-84	78.15	610	SOV23410.1
apical membrane antigen 1 [Plasmodium gaboni]	Plasmodium g...	NA	647221	258	258	1	7e-83	77.48	610	SOV15862.1
apical membrane antigen 1 [Plasmodium vivax]	Plasmodium v...	malaria para...	5855	201	201	1	2e-65	57.62	193	ACN69713.1
apical membrane antigen 1 [Plasmodium vivax]	Plasmodium v...	malaria para...	5855	200	200	1	3e-65	57.62	193	ACN69769.1
apical membrane antigen 1 [Plasmodium vivax]	Plasmodium v...	malaria para...	5855	199	199	1	6e-65	57.62	193	ACN69707.1
apical membrane antigen 1 [Plasmodium vivax]	Plasmodium v...	malaria para...	5855	199	199	1	7e-65	57.62	193	ACN69725.1
apical membrane antigen 1 [Plasmodium vivax]	Plasmodium v...	malaria para...	5855	199	199	1	7e-65	57.62	193	ACN69705.1
apical membrane antigen 1 [Plasmodium vivax]	Plasmodium v...	malaria para...	5855	199	199	1	8e-65	57.62	193	ACN69757.1
apical membrane antigen 1 [Plasmodium vivax]	Plasmodium v...	malaria para...	5855	199	199	1	8e-65	57.62	193	ACN69698.1
apical membrane antigen-1 [Plasmodium vivax]	Plasmodium v...	malaria para...	5855	199	199	1	9e-65	57.62	203	AAL83941.1
apical membrane antigen 1 [Plasmodium vivax]	Plasmodium v...	malaria para...	5855	199	199	1	9e-65	56.95	193	ACN69712.1
apical membrane antigen 1 [Plasmodium vivax]	Plasmodium v...	malaria para...	5855	198	198	1	1e-64	57.62	193	ACN69766.1
apical membrane antigen 1 [Plasmodium vivax]	Plasmodium v...	malaria para...	5855	198	198	1	2e-64	56.95	193	ACN69709.1
apical membrane antigen 1 [Plasmodium vivax]	Plasmodium v...	malaria para...	5855	198	198	1	2e-64	57.62	193	ACN69783.1
apical membrane antigen 1 [Plasmodium vivax]	Plasmodium v...	malaria para...	5855	198	198	1	2e-64	56.95	193	ACN69729.1
apical membrane antigen 1 [Plasmodium vivax]	Plasmodium v...	malaria para...	5855	198	198	1	2e-64	56.95	193	ACN69702.1
apical membrane antigen-1 [Plasmodium vivax]	Plasmodium v...	malaria para...	5855	198	198	1	3e-64	57.62	203	AAL83940.1
apical membrane antigen 1 [Plasmodium vivax]	Plasmodium v...	malaria para...	5855	197	197	1	3e-64	56.95	193	ACN69764.1
apical membrane antigen 1 [Plasmodium vivax]	Plasmodium v...	malaria para...	5855	197	197	1	3e-64	56.95	193	ACN69756.1
apical membrane antigen 1 [Plasmodium vivax]	Plasmodium v...	malaria para...	5855	197	197	1	3e-64	56.95	193	ACN69753.1
apical membrane antigen 1 [Plasmodium vivax]	Plasmodium v...	malaria para...	5855	197	197	1	4e-64	56.29	193	ACN69720.1
apical membrane antigen 1 [Plasmodium vivax]	Plasmodium v...	malaria para...	5855	197	197	1	5e-64	56.95	193	ACN69748.1
apical membrane antigen 1 [Plasmodium vivax]	Plasmodium v...	malaria para...	5855	197	197	1	6e-64	56.95	193	ACN69735.1
apical membrane antigen 1 [Plasmodium vivax]	Plasmodium v...	malaria para...	5855	197	197	1	6e-64	56.95	193	ACN69715.1
apical membrane antigen 1 [Plasmodium vivax]	Plasmodium v...	malaria para...	5855	197	197	1	7e-64	56.95	193	ACN69716.1
apical membrane antigen 1 [Plasmodium vivax]	Plasmodium v...	malaria para...	5855	196	196	1	8e-64	56.95	193	ACN69749.1
apical membrane antigen 1 [Plasmodium vivax]	Plasmodium v...	malaria para...	5855	196	196	1	8e-64	56.29	193	ACN69706.1
apical membrane antigen 1 [Plasmodium vivax]	Plasmodium v...	malaria para...	5855	196	196	1	9e-64	56.95	193	ACN69727.1
apical membrane antigen 1 [Plasmodium vivax]	Plasmodium v...	malaria para...	5855	196	196	1	9e-64	56.29	193	ACN69697.1
apical membrane antigen 1 [Plasmodium vivax]	Plasmodium v...	malaria para...	5855	196	196	1	9e-64	56.95	193	ACN69779.1
apical membrane antigen 1 [Plasmodium vivax]	Plasmodium v...	malaria para...	5855	196	196	1	1e-63	56.29	193	ACN69704.1
apical membrane antigen 1 [Plasmodium vivax]	Plasmodium v...	malaria para...	5855	196	196	1	1e-63	56.95	193	ACN69717.1
apical membrane antigen 1 [Plasmodium vivax]	Plasmodium v...	malaria para...	5855	196	196	1	2e-63	56.29	193	ACN69718.1
apical membrane antigen 1 [Plasmodium vivax]	Plasmodium v...	malaria para...	5855	195	195	1	2e-63	56.29	193	ACN69772.1
apical membrane antigen 1 [Plasmodium vivax]	Plasmodium v...	malaria para...	5855	195	195	1	2e-63	56.29	193	ACN69736.1
apical membrane antigen 1 [Plasmodium vivax]	Plasmodium v...	malaria para...	5855	195	195	1	3e-63	56.29	193	ACN69699.1
apical membrane antigen 1 [Plasmodium vivax]	Plasmodium v...	malaria para...	5855	195	195	1	3e-63	56.29	193	ACN69701.1
apical membrane antigen 1 [Plasmodium vivax]	Plasmodium v...	malaria para...	5855	195	195	1	3e-63	56.29	193	ACN69696.1
apical membrane antigen 1 [Plasmodium vivax]	Plasmodium v...	malaria para...	5855	195	195	1	3e-63	56.29	193	ACN69728.1
apical membrane antigen 1 [Plasmodium vivax]	Plasmodium v...	malaria para...	5855	195	195	1	3e-63	56.29	193	ACN69775.1
apical membrane antigen 1 [Plasmodium gonderi]	Plasmodium g...	NA	77519	206	206	1	3e-63	58.94	562	XP_028543689.1
apical membrane antigen 1 [Plasmodium vivax]	Plasmodium v...	malaria para...	5855	195	195	1	3e-63	56.29	193	ACN69763.1
apical membrane antigen 1 [Plasmodium vivax]	Plasmodium v...	malaria para...	5855	194	194	1	6e-63	55.63	193	ACN69760.1
apical membrane antigen 1 [Plasmodium malariae]	Plasmodium m...	NA	5858	204	204	1	6e-63	59.6	527	AUR33969.1
apical membrane antigen 1 [Plasmodium malariae]	Plasmodium m...	NA	5858	204	204	1	7e-63	59.6	527	AUR33974.1
apical merozoite antigen 1 [Plasmodium cynomolgi strain B]	Plasmodium c...	NA	1120755	204	204	1	7e-63	58.94	533	XP_004222555.1
apical membrane antigen 1 [Plasmodium malariae]	Plasmodium m...	NA	5858	204	204	1	7e-63	59.6	527	AUR33972.1
apical membrane antigen 1 [Plasmodium vivax]	Plasmodium v...	malaria para...	5855	194	194	1	7e-63	55.63	193	ACN69782.1
apical membrane antigen 1 [Plasmodium malariae]	Plasmodium m...	NA	5858	204	204	1	7e-63	59.6	527	AUR33973.1
apical membrane antigen 1 [Plasmodium vivax]	Plasmodium v...	malaria para...	5855	194	194	1	8e-63	55.63	193	ACN69761.1
apical membrane antigen 1 [Plasmodium vivax]	Plasmodium v...	malaria para...	5855	194	194	1	8e-63	55.63	193	ACN69695.1
apical membrane antigen 1 [Plasmodium malariae]	Plasmodium m...	NA	5858	204	204	1	9e-63	59.6	527	AUR33975.1
apical membrane antigen 1 [Plasmodium malariae]	Plasmodium m...	NA	5858	204	204	1	9e-63	59.6	527	AUR33955.1
apical membrane antigen 1 [Plasmodium malariae]	Plasmodium m...	NA	5858	204	204	1	1e-62	59.6	527	AUR33966.1
apical membrane antigen 1 [Plasmodium malariae]	Plasmodium m...	NA	5858	204	204	1	1e-62	59.6	562	SBS85741.1
apical membrane antigen 1 [Plasmodium malariae]	Plasmodium m...	NA	5858	203	203	1	1e-62	59.6	527	AUR33968.1
apical membrane antigen [Plasmodium sp.]	Plasmodium sp.	NA	31272	204	204	1	1e-62	59.6	562	AKQ33103.1
apical membrane antigen [Plasmodium sp.]	Plasmodium sp.	NA	31272	204	204	1	1e-62	59.6	558	AKQ33105.1
apical membrane antigen [Plasmodium cynomolgi]	Plasmodium c...	NA	5827	204	204	1	1e-62	58.94	562	AKQ33085.1
apical membrane antigen [Plasmodium sp.]	Plasmodium sp.	NA	31272	204	204	1	2e-62	59.6	557	AKQ33102.1
apical membrane antigen 1, putative [Plasmodium malariae]	Plasmodium m...	NA	5858	204	204	1	2e-62	59.6	562	XP_028861748.1
apical membrane antigen [Plasmodium hylobati]	Plasmodium h...	NA	77520	203	203	1	3e-62	58.94	562	AKQ33090.1
apical membrane antigen I [Plasmodium vivax]	Plasmodium v...	malaria para...	5855	200	200	1	3e-62	57.62	430	APT35579.1
apical membrane antigen 1 [Plasmodium malariae]	Plasmodium m...	NA	5858	202	202	1	4e-62	58.94	527	AUR33970.1
apical membrane antigen 1 [Plasmodium vivax]	Plasmodium v...	malaria para...	5855	192	192	1	4e-62	55.63	193	ACN69768.1
apical membrane antigen 1 [Plasmodium vivax]	Plasmodium v...	malaria para...	5855	200	200	1	4e-62	57.62	445	QEQ12063.1
apical membrane antigen I [Plasmodium vivax]	Plasmodium v...	malaria para...	5855	199	199	1	6e-62	57.62	430	APT35538.1
apical membrane antigen 1 [Plasmodium vivax]	Plasmodium v...	malaria para...	5855	199	199	1	6e-62	57.62	445	QEQ12019.1
apical membrane antigen 1 [Plasmodium vivax]	Plasmodium v...	malaria para...	5855	199	199	1	7e-62	57.62	445	QEQ12022.1
apical membrane antigen 1 [Plasmodium vivax]	Plasmodium v...	malaria para...	5855	199	199	1	8e-62	57.62	445	QEQ11982.1
apical membrane antigen I [Plasmodium vivax]	Plasmodium v...	malaria para...	5855	199	199	1	8e-62	57.62	430	APT35512.1
apical membrane antigen [Plasmodium sp.]	Plasmodium sp.	NA	31272	202	202	1	8e-62	58.28	557	AKQ33101.1
apical membrane antigen I [Plasmodium vivax]	Plasmodium v...	malaria para...	5855	199	199	1	9e-62	57.62	430	APT35516.1
apical membrane antigen 1 [Plasmodium vivax]	Plasmodium v...	malaria para...	5855	191	191	1	9e-62	54.97	193	ACN69733.1
apical membrane antigen 1 [Plasmodium vivax]	Plasmodium v...	malaria para...	5855	201	201	1	1e-61	58.28	546	ABM63521.1
apical membrane antigen 1, putative [Plasmodium malariae]	Plasmodium m...	NA	5858	201	201	1	1e-61	58.94	547	SBT71431.1
apical membrane antigen [Plasmodium sp. Pongo clade A]	Plasmodium s...	NA	1577157	201	201	1	1e-61	58.28	557	AKQ33106.1
apical membrane antigen 1 [Plasmodium vivax]	Plasmodium v...	malaria para...	5855	199	199	1	1e-61	57.62	445	QEQ12041.1
apical membrane antigen 1 [Plasmodium vivax]	Plasmodium v...	malaria para...	5855	199	199	1	1e-61	56.95	445	QEQ12038.1
apical membrane antigen 1 [Plasmodium vivax]	Plasmodium v...	malaria para...	5855	199	199	1	1e-61	57.62	445	QEQ12000.1
apical membrane antigen [Plasmodium cynomolgi]	Plasmodium c...	NA	5827	201	201	1	1e-61	58.28	562	AKQ33086.1
apical membrane antigen 1 [Plasmodium vivax]	Plasmodium v...	malaria para...	5855	201	201	1	1e-61	58.28	562	AZL41003.1
apical membrane antigen [Plasmodium sp.]	Plasmodium sp.	NA	31272	201	201	1	2e-61	58.28	562	AKQ33104.1
apical membrane antigen 1 [Plasmodium malariae]	Plasmodium m...	NA	5858	201	201	1	2e-61	58.28	527	AUR33953.1
apical membrane antigen-1 [Plasmodium vivax]	Plasmodium v...	malaria para...	5855	200	200	1	2e-61	57.62	501	ABN11190.1
apical membrane antigen I [Plasmodium vivax]	Plasmodium v...	malaria para...	5855	198	198	1	2e-61	56.95	430	APT35521.1
apical membrane antigen 1 [Plasmodium malariae]	Plasmodium m...	NA	5858	200	200	1	2e-61	58.28	527	AUR33954.1
apical membrane antigen [Plasmodium cynomolgi]	Plasmodium c...	NA	5827	201	201	1	2e-61	57.62	562	AKQ33083.1
apical membrane protein-1 [Plasmodium vivax]	Plasmodium v...	malaria para...	5855	197	197	1	2e-61	56.95	402	AGY92834.1
apical membrane antigen 1 [Plasmodium vivax]	Plasmodium v...	malaria para...	5855	198	198	1	2e-61	57.62	445	QEQ12006.1
apical membrane antigen 1 [Plasmodium vivax]	Plasmodium v...	malaria para...	5855	201	201	1	2e-61	57.62	540	ACB55389.1
apical membrane antigen I [Plasmodium vivax]	Plasmodium v...	malaria para...	5855	198	198	1	2e-61	57.62	430	APT35519.1
apical membrane antigen 1 [Plasmodium vivax]	Plasmodium v...	malaria para...	5855	198	198	1	2e-61	56.95	445	QEQ11994.1
apical membrane antigen 1 [Plasmodium vivax]	Plasmodium v...	malaria para...	5855	196	196	1	2e-61	56.95	350	ABM63517.1
apical membrane antigen 1 [Plasmodium vivax]	Plasmodium v...	malaria para...	5855	198	198	1	2e-61	56.95	445	QEQ12003.1
apical membrane antigen 1 [Plasmodium vivax]	Plasmodium v...	malaria para...	5855	199	199	1	2e-61	57.62	507	AGG39600.1
Chain A, Apical Membrane Antigen 1 [Plasmodium vivax]	Plasmodium v...	malaria para...	5855	198	198	1	2e-61	57.62	447	1W81_A
apical membrane protein-1 [Plasmodium vivax]	Plasmodium v...	malaria para...	5855	201	201	1	2e-61	58.28	562	ACY68791.1
apical membrane antigen 1 [Plasmodium vivax]	Plasmodium v...	malaria para...	5855	198	198	1	3e-61	56.95	445	QEQ12045.1
apical membrane antigen 1 [Plasmodium vivax]	Plasmodium v...	malaria para...	5855	198	198	1	3e-61	57.62	445	QEQ12039.1
apical membrane antigen 1 [Plasmodium vivax]	Plasmodium v...	malaria para...	5855	198	198	1	3e-61	56.95	445	QEQ12042.1
apical membrane antigen 1 [Plasmodium malariae]	Plasmodium m...	NA	5858	200	200	1	3e-61	58.28	527	AUR33960.1
Chain D, APICAL MEMBRANE ANTIGEN 1 [Plasmodium vivax]	Plasmodium v...	malaria para...	5855	198	198	1	3e-61	57.62	445	2J4W_D
apical membrane antigen 1 [Plasmodium vivax]	Plasmodium v...	malaria para...	5855	200	200	1	3e-61	57.62	540	ACB55371.1
apical membrane antigen 1 [Plasmodium malariae]	Plasmodium m...	NA	5858	200	200	1	3e-61	58.28	527	AUR33959.1
apical membrane antigen-1 [Plasmodium vivax]	Plasmodium v...	malaria para...	5855	200	200	1	3e-61	58.28	555	BAH96576.1
apical membrane antigen 1 [Plasmodium vivax]	Plasmodium v...	malaria para...	5855	200	200	1	3e-61	57.62	562	AZL41010.1
apical membrane antigen 1 [Plasmodium vivax]	Plasmodium v...	malaria para...	5855	199	199	1	3e-61	56.95	507	AGG39617.1
apical membrane antigen 1 [Plasmodium vivax]	Plasmodium v...	malaria para...	5855	200	200	1	3e-61	57.62	562	AZL41006.1
apical membrane antigen 1 [Plasmodium vivax]	Plasmodium v...	malaria para...	5855	199	199	1	4e-61	56.95	507	AGG39618.1
apical membrane antigen 1 [Plasmodium malariae]	Plasmodium m...	NA	5858	199	199	1	4e-61	58.28	527	AUR33961.1
apical membrane antigen 1 [Plasmodium vivax]	Plasmodium v...	malaria para...	5855	200	200	1	4e-61	57.62	562	AZL41002.1
apical membrane antigen 1 [Plasmodium vivax]	Plasmodium v...	malaria para...	5855	199	199	1	4e-61	57.62	507	AGG39625.1
apical membrane antigen 1 [Plasmodium vivax]	Plasmodium v...	malaria para...	5855	199	199	1	4e-61	57.62	508	AGS41020.1
apical membrane antigen 1 [Plasmodium vivax]	Plasmodium v...	malaria para...	5855	197	197	1	4e-61	56.95	445	QEQ11976.1
apical membrane antigen 1 [Plasmodium vivax]	Plasmodium v...	malaria para...	5855	200	200	1	4e-61	57.62	562	AZL41020.1
apical membrane antigen 1 [Plasmodium vivax]	Plasmodium v...	malaria para...	5855	197	197	1	4e-61	56.95	445	QEQ12057.1
apical membrane antigen 1 [Plasmodium vivax]	Plasmodium v...	malaria para...	5855	197	197	1	4e-61	56.95	445	QEQ12031.1
apical membrane antigen 1 [Plasmodium vivax]	Plasmodium v...	malaria para...	5855	199	199	1	4e-61	56.95	508	AGS40997.1
apical membrane antigen 1 [Plasmodium vivax]	Plasmodium v...	malaria para...	5855	200	200	1	4e-61	57.62	562	AZL41011.1
apical membrane antigen 1 [Plasmodium vivax]	Plasmodium v...	malaria para...	5855	199	199	1	4e-61	56.95	508	AGS40989.1
apical membrane antigen 1 [Plasmodium vivax]	Plasmodium v...	malaria para...	5855	199	199	1	4e-61	56.95	508	AGS40961.1
apical membrane antigen 1 [Plasmodium vivax]	Plasmodium v...	malaria para...	5855	199	199	1	4e-61	56.95	508	AGS40992.1
apical membrane antigen 1 [Plasmodium vivax]	Plasmodium v...	malaria para...	5855	200	200	1	4e-61	57.62	562	AZL41028.1
apical membrane antigen 1 [Plasmodium vivax]	Plasmodium v...	malaria para...	5855	199	199	1	4e-61	56.95	508	AGS40944.1
apical membrane antigen 1 [Plasmodium vivax]	Plasmodium v...	malaria para...	5855	199	199	1	4e-61	56.95	508	AGS40934.1
apical membrane antigen 1 [Plasmodium vivax]	Plasmodium v...	malaria para...	5855	199	199	1	4e-61	56.95	508	AGS40952.1
apical membrane antigen I [Plasmodium vivax]	Plasmodium v...	malaria para...	5855	197	197	1	4e-61	56.95	430	APT35511.1
apical membrane antigen 1 [Plasmodium vivax]	Plasmodium v...	malaria para...	5855	197	197	1	5e-61	56.95	445	QEQ12053.1
apical membrane antigen 1 [Plasmodium vivax]	Plasmodium v...	malaria para...	5855	197	197	1	5e-61	56.95	445	QEQ12018.1
apical membrane antigen 1 [Plasmodium vivax]	Plasmodium v...	malaria para...	5855	199	199	1	5e-61	56.95	508	AGS40951.1
apical membrane antigen 1 [Plasmodium vivax]	Plasmodium v...	malaria para...	5855	199	199	1	5e-61	56.95	508	AGS40986.1
apical membrane antigen 1 [Plasmodium vivax]	Plasmodium v...	malaria para...	5855	199	199	1	5e-61	57.62	507	AGG39613.1
apical membrane antigen 1 [Plasmodium vivax]	Plasmodium v...	malaria para...	5855	199	199	1	5e-61	56.95	508	AGS40991.1
apical membrane antigen 1 [Plasmodium vivax]	Plasmodium v...	malaria para...	5855	199	199	1	5e-61	56.95	508	AGS40976.1
apical membrane antigen I [Plasmodium vivax]	Plasmodium v...	malaria para...	5855	197	197	1	5e-61	56.95	430	APT35525.1
apical membrane protein-1 [Plasmodium vivax]	Plasmodium v...	malaria para...	5855	200	200	1	5e-61	57.62	562	ACY68827.1
apical membrane antigen 1 [Plasmodium vivax]	Plasmodium v...	malaria para...	5855	199	199	1	5e-61	56.95	508	AGS41008.1
apical membrane antigen 1 [Plasmodium vivax]	Plasmodium v...	malaria para...	5855	200	200	1	5e-61	57.62	562	VUZ96005.1
apical membrane antigen 1 [Plasmodium vivax]	Plasmodium v...	malaria para...	5855	197	197	1	5e-61	56.95	445	QEQ12013.1
apical membrane protein-1 [Plasmodium vivax]	Plasmodium v...	malaria para...	5855	200	200	1	6e-61	57.62	562	ACY68820.1
apical membrane antigen [Plasmodium cynomolgi]	Plasmodium c...	NA	5827	200	200	1	6e-61	57.62	562	AKQ33084.1
apcial membrane antigen I [Plasmodium vivax]	Plasmodium v...	malaria para...	5855	199	199	1	6e-61	57.62	555	AAA29479.1
apical membrane antigen I [Plasmodium vivax]	Plasmodium v...	malaria para...	5855	196	196	1	6e-61	56.95	430	APT35533.1
apical membrane protein-1 [Plasmodium vivax]	Plasmodium v...	malaria para...	5855	199	199	1	6e-61	57.62	562	ACY68849.1
apical membrane antigen 1 [Plasmodium vivax]	Plasmodium v...	malaria para...	5855	197	197	1	6e-61	56.95	445	QEQ12036.1
apical membrane antigen [Plasmodium inui]	Plasmodium inui	NA	52288	199	199	1	6e-61	57.62	562	AKQ33097.1
apical membrane antigen 1 [Plasmodium vivax]	Plasmodium v...	malaria para...	5855	197	197	1	6e-61	56.95	445	QEQ12011.1
apical membrane antigen 1 [Plasmodium vivax]	Plasmodium v...	malaria para...	5855	198	198	1	6e-61	56.95	508	AGS40941.1
apical membrane antigen 1 [Plasmodium vivax]	Plasmodium v...	malaria para...	5855	198	198	1	7e-61	56.95	508	AGS40942.1
apical membrane antigen 1 [Plasmodium vivax]	Plasmodium v...	malaria para...	5855	198	198	1	7e-61	56.95	508	AGS41026.1
apical membrane antigen 1 [Plasmodium vivax]	Plasmodium v...	malaria para...	5855	198	198	1	7e-61	57.62	507	AGG39615.1
apical membrane antigen 1 [Plasmodium vivax]	Plasmodium v...	malaria para...	5855	198	198	1	7e-61	56.95	508	AGS40960.1
apical membrane antigen 1 [Plasmodium vivax]	Plasmodium v...	malaria para...	5855	198	198	1	7e-61	57.62	508	AGS40933.1
apical membrane antigen 1 [Plasmodium vivax]	Plasmodium v...	malaria para...	5855	198	198	1	7e-61	57.62	507	AGG39610.1
apical membrane antigen 1 [Plasmodium vivax]	Plasmodium v...	malaria para...	5855	198	198	1	8e-61	56.95	508	AGS40948.1
apical membrane antigen 1 [Plasmodium vivax]	Plasmodium v...	malaria para...	5855	199	199	1	8e-61	57.62	540	ACB55354.1
apical membrane antigen 1 [Plasmodium vivax]	Plasmodium v...	malaria para...	5855	199	199	1	8e-61	57.62	562	AZL41023.1
apical membrane antigen 1 [Plasmodium vivax]	Plasmodium v...	malaria para...	5855	198	198	1	8e-61	56.95	508	AGS40938.1
apical membrane antigen 1 [Plasmodium vivax]	Plasmodium v...	malaria para...	5855	198	198	1	8e-61	56.95	508	AGS40993.1
apical membrane antigen 1 [Plasmodium vivax]	Plasmodium v...	malaria para...	5855	199	199	1	8e-61	57.62	540	ACB55357.1
apical membrane antigen I [Plasmodium vivax]	Plasmodium v...	malaria para...	5855	196	196	1	8e-61	56.95	430	APT35543.1
apical membrane antigen-1 [Plasmodium vivax]	Plasmodium v...	malaria para...	5855	199	199	1	8e-61	57.62	562	UFQ05861.1
apical membrane protein-1 [Plasmodium vivax]	Plasmodium v...	malaria para...	5855	199	199	1	8e-61	57.62	562	ACY68802.1
apical membrane antigen 1 [Plasmodium vivax]	Plasmodium v...	malaria para...	5855	198	198	1	8e-61	56.95	508	AGS40969.1
apical membrane antigen 1 [Plasmodium vivax]	Plasmodium v...	malaria para...	5855	198	198	1	8e-61	56.95	508	AGS41021.1
apical membrane protein-1 [Plasmodium vivax]	Plasmodium v...	malaria para...	5855	196	196	1	8e-61	56.29	409	AGY92836.1
apical membrane antigen 1 [Plasmodium vivax]	Plasmodium v...	malaria para...	5855	198	198	1	8e-61	56.95	508	AGS40988.1
apical membrane antigen 1 [Plasmodium vivax]	Plasmodium v...	malaria para...	5855	198	198	1	8e-61	56.95	508	AGS41033.1
apical membrane antigen 1 [Plasmodium vivax]	Plasmodium v...	malaria para...	5855	198	198	1	8e-61	56.95	508	AGS40935.1
apical membrane antigen 1 [Plasmodium vivax]	Plasmodium v...	malaria para...	5855	198	198	1	8e-61	56.95	508	AGS40987.1
apical membrane antigen 1 [Plasmodium vivax]	Plasmodium v...	malaria para...	5855	198	198	1	9e-61	56.95	508	AGS40954.1
apical membrane antigen 1 [Plasmodium vivax]	Plasmodium v...	malaria para...	5855	198	198	1	9e-61	56.95	508	AGS41022.1
apical membrane antigen 1 [Plasmodium vivax]	Plasmodium v...	malaria para...	5855	198	198	1	9e-61	57.62	508	AGS40974.1
apical membrane antigen 1 [Plasmodium vivax]	Plasmodium v...	malaria para...	5855	198	198	1	9e-61	56.95	508	AGS40963.1
apical membrane antigen 1 [Plasmodium vivax]	Plasmodium v...	malaria para...	5855	198	198	1	9e-61	56.95	508	AGS40966.1
apical membrane antigen 1 [Plasmodium vivax]	Plasmodium v...	malaria para...	5855	198	198	1	9e-61	57.62	508	AGS41028.1
apical membrane antigen 1 [Plasmodium vivax]	Plasmodium v...	malaria para...	5855	198	198	1	9e-61	56.95	508	AGS40958.1
apical membrane antigen 1 [Plasmodium vivax]	Plasmodium v...	malaria para...	5855	198	198	1	9e-61	56.95	508	AGS40994.1
merozoite receptor PK66 [Plasmodium vivax North Korean]	Plasmodium v...	NA	1035514	199	199	1	9e-61	57.62	562	KMZ99594.1
apical membrane protein-1 [Plasmodium vivax]	Plasmodium v...	malaria para...	5855	199	199	1	9e-61	57.62	562	ACY68830.1
apical membrane antigen 1 [Plasmodium vivax]	Plasmodium v...	malaria para...	5855	198	198	1	9e-61	56.95	508	AGS41009.1
apical membrane antigen 1 [Plasmodium vivax]	Plasmodium v...	malaria para...	5855	198	198	1	9e-61	56.95	508	AGS41013.1
apical membrane antigen 1 [Plasmodium vivax]	Plasmodium v...	malaria para...	5855	198	198	1	9e-61	56.95	508	AGS40949.1
apical membrane antigen 1 [Plasmodium vivax]	Plasmodium v...	malaria para...	5855	198	198	1	1e-60	56.95	508	AGS40955.1
apical membrane antigen 1 [Plasmodium vivax]	Plasmodium v...	malaria para...	5855	199	199	1	1e-60	57.62	562	AKC42164.1
apical membrane antigen 1 [Plasmodium vivax]	Plasmodium v...	malaria para...	5855	198	198	1	1e-60	56.95	508	AGS40979.1
apical membrane antigen I [Plasmodium vivax]	Plasmodium v...	malaria para...	5855	196	196	1	1e-60	56.95	430	APT35518.1
unnamed protein product [Plasmodium vivax]	Plasmodium v...	malaria para...	5855	199	199	1	1e-60	57.62	562	CAG9477055.1
apical membrane protein-1 [Plasmodium vivax]	Plasmodium v...	malaria para...	5855	199	199	1	1e-60	57.62	562	ACY68754.1
apical membrane antigen-1 [Plasmodium vivax]	Plasmodium v...	malaria para...	5855	199	199	1	1e-60	57.62	562	UFQ05857.1
apical membrane protein-1 [Plasmodium vivax]	Plasmodium v...	malaria para...	5855	199	199	1	1e-60	57.62	562	ACY68871.1
apical membrane antigen-1 [Plasmodium vivax]	Plasmodium v...	malaria para...	5855	199	199	1	1e-60	57.62	562	UFQ05845.1
apical membrane antigen 1 [Plasmodium vivax]	Plasmodium v...	malaria para...	5855	198	198	1	1e-60	56.95	508	AGS41007.1
Chain A, Apical merozoite antigen 1 [Plasmodium vivax Sal-1]	Plasmodium v...	NA	126793	197	197	1	1e-60	56.95	471	5NQG_A
apical membrane antigen I [Plasmodium vivax]	Plasmodium v...	malaria para...	5855	196	196	1	1e-60	56.95	430	APT35557.1
apical membrane antigen 1 [Plasmodium vivax]	Plasmodium v...	malaria para...	5855	198	198	1	1e-60	56.95	508	AGS40939.1
apical membrane antigen 1 [Plasmodium vivax]	Plasmodium v...	malaria para...	5855	198	198	1	1e-60	56.95	507	AGG39606.1
apical membrane antigen I [Plasmodium vivax]	Plasmodium v...	malaria para...	5855	196	196	1	1e-60	56.95	430	APT35564.1
apical membrane antigen 1 [Plasmodium vivax]	Plasmodium v...	malaria para...	5855	198	198	1	1e-60	56.95	508	AGS40959.1
apical membrane antigen 1 [Plasmodium vivax]	Plasmodium v...	malaria para...	5855	199	199	1	1e-60	57.62	546	ABM63524.1
apical membrane antigen [Plasmodium vivax]	Plasmodium v...	malaria para...	5855	199	199	1	1e-60	57.62	561	AKQ33082.1
apical membrane antigen 1 [Plasmodium vivax]	Plasmodium v...	malaria para...	5855	199	199	1	1e-60	57.62	562	AZL41024.1
apical membrane antigen 1 [Plasmodium vivax]	Plasmodium v...	malaria para...	5855	198	198	1	1e-60	57.62	540	ACB55391.1
apical membrane antigen 1 [Plasmodium vivax]	Plasmodium v...	malaria para...	5855	196	196	1	1e-60	56.95	445	QEQ12054.1
apical membrane antigen 1 [Plasmodium vivax]	Plasmodium v...	malaria para...	5855	197	197	1	1e-60	56.95	507	AGG39603.1
apical membrane protein-1 [Plasmodium vivax]	Plasmodium v...	malaria para...	5855	199	199	1	1e-60	56.95	562	ACY68725.1
apical membrane antigen 1 [Plasmodium vivax]	Plasmodium v...	malaria para...	5855	196	196	1	1e-60	56.95	445	QEQ12017.1
apical membrane protein-1 [Plasmodium vivax]	Plasmodium v...	malaria para...	5855	199	199	1	1e-60	57.62	562	ACY68750.1
apical membrane antigen-1 [Plasmodium vivax]	Plasmodium v...	malaria para...	5855	199	199	1	1e-60	57.62	562	UFQ05820.1
apical membrane antigen 1 [Plasmodium vivax]	Plasmodium v...	malaria para...	5855	197	197	1	1e-60	56.95	508	AGS40950.1
apical membrane antigen 1 [Plasmodium vivax]	Plasmodium v...	malaria para...	5855	197	197	1	1e-60	56.95	508	AGS40956.1
apical membrane antigen-1 [Plasmodium vivax]	Plasmodium v...	malaria para...	5855	199	199	1	1e-60	57.62	562	UFQ05934.1
apical membrane antigen 1 [Plasmodium vivax]	Plasmodium v...	malaria para...	5855	199	199	1	1e-60	57.62	562	AZL41025.1
apical membrane antigen 1 [Plasmodium vivax]	Plasmodium v...	malaria para...	5855	196	196	1	1e-60	56.95	445	QEQ12065.1
apical membrane antigen 1 [Plasmodium vivax]	Plasmodium v...	malaria para...	5855	197	197	1	1e-60	56.95	508	AGS40970.1
apical membrane antigen 1 [Plasmodium vivax]	Plasmodium v...	malaria para...	5855	196	196	1	1e-60	56.95	445	CAA76546.1
apical membrane antigen 1 [Plasmodium vivax]	Plasmodium v...	malaria para...	5855	197	197	1	1e-60	56.95	508	AGS40947.1
apical membrane antigen 1 [Plasmodium vivax]	Plasmodium v...	malaria para...	5855	197	197	1	1e-60	56.95	508	AGS40977.1
apical membrane antigen 1 [Plasmodium vivax]	Plasmodium v...	malaria para...	5855	196	196	1	1e-60	56.95	445	QEQ12025.1
apical merozoite protein 1 [Plasmodium vivax]	Plasmodium v...	malaria para...	5855	199	199	1	1e-60	57.62	562	ACB42434.1
apical membrane antigen 1 [Plasmodium vivax]	Plasmodium v...	malaria para...	5855	196	196	1	1e-60	56.95	445	QEQ11981.1
apical membrane antigen [Plasmodium vivax]	Plasmodium v...	malaria para...	5855	195	195	1	1e-60	56.29	421	AEK49000.1
apical membrane antigen 1 [Plasmodium vivax]	Plasmodium v...	malaria para...	5855	197	197	1	1e-60	56.95	508	AGS40967.1
apical membrane antigen [Plasmodium simiovale]	Plasmodium s...	NA	35085	199	199	1	1e-60	56.95	560	AKQ33089.1
apical membrane antigen 1 [Plasmodium vivax]	Plasmodium v...	malaria para...	5855	197	197	1	1e-60	56.95	508	AGS40936.1
apical membrane antigen 1 [Plasmodium vivax]	Plasmodium v...	malaria para...	5855	197	197	1	1e-60	56.95	508	AGS40975.1
apical membrane antigen I [Plasmodium vivax]	Plasmodium v...	malaria para...	5855	196	196	1	2e-60	56.29	430	APT35513.1
apical membrane antigen 1 [Plasmodium vivax]	Plasmodium v...	malaria para...	5855	197	197	1	2e-60	56.95	508	AGS41011.1
apical membrane antigen I [Plasmodium vivax]	Plasmodium v...	malaria para...	5855	196	196	1	2e-60	56.29	430	APT35548.1
apical membrane antigen 1 [Plasmodium vivax]	Plasmodium v...	malaria para...	5855	198	198	1	2e-60	56.95	540	ACB55332.1
apical membrane antigen 1 [Plasmodium vivax]	Plasmodium v...	malaria para...	5855	196	196	1	2e-60	56.29	445	QEQ12014.1
apical membrane antigen I [Plasmodium vivax]	Plasmodium v...	malaria para...	5855	195	195	1	2e-60	56.29	430	APT35528.1
apical membrane antigen-1 [Plasmodium vivax]	Plasmodium v...	malaria para...	5855	198	198	1	2e-60	57.62	562	UFQ05836.1
apical merozoite protein 1 [Plasmodium vivax]	Plasmodium v...	malaria para...	5855	198	198	1	2e-60	57.62	562	ACB42437.1
apical membrane antigen 1 [Plasmodium vivax]	Plasmodium v...	malaria para...	5855	196	196	1	2e-60	56.29	445	QEQ12049.1
apical membrane antigen 1 [Plasmodium vivax]	Plasmodium v...	malaria para...	5855	198	198	1	2e-60	57.62	562	AZL41039.1
apical membrane antigen 1 [Plasmodium vivax]	Plasmodium v...	malaria para...	5855	196	196	1	2e-60	56.29	445	QEQ12026.1
apical membrane antigen 1 [Plasmodium vivax]	Plasmodium v...	malaria para...	5855	196	196	1	2e-60	56.29	445	QEQ11970.1
apical membrane antigen 1 [Plasmodium vivax]	Plasmodium v...	malaria para...	5855	198	198	1	2e-60	57.62	562	CAI7720619.1
apical membrane antigen 1 [Plasmodium vivax]	Plasmodium v...	malaria para...	5855	196	196	1	2e-60	56.29	445	QEQ11992.1
apical membrane antigen-1 [Plasmodium vivax]	Plasmodium v...	malaria para...	5855	198	198	1	2e-60	57.62	562	UFQ05833.1
apical membrane antigen 1 [Plasmodium vivax]	Plasmodium v...	malaria para...	5855	198	198	1	2e-60	57.62	562	AKC42173.1
apical membrane antigen [Plasmodium vivax]	Plasmodium v...	malaria para...	5855	195	195	1	2e-60	56.29	421	AEK49001.1
apical membrane antigen 1 [Plasmodium vivax]	Plasmodium v...	malaria para...	5855	196	196	1	2e-60	56.29	445	QEQ12030.1
apical membrane antigen 1 [Plasmodium vivax]	Plasmodium v...	malaria para...	5855	196	196	1	2e-60	56.29	445	QEQ12050.1
apical membrane antigen-1 [Plasmodium vivax]	Plasmodium v...	malaria para...	5855	198	198	1	2e-60	57.62	562	UFQ05878.1
apical membrane antigen 1 [Plasmodium vivax]	Plasmodium v...	malaria para...	5855	198	198	1	2e-60	57.62	562	AKC42223.1
apical membrane protein-1 [Plasmodium vivax]	Plasmodium v...	malaria para...	5855	195	195	1	2e-60	56.29	422	AGY92835.1
apical membrane antigen 1 [Plasmodium vivax]	Plasmodium v...	malaria para...	5855	197	197	1	2e-60	56.29	508	AGS40957.1
apical membrane antigen 1 [Plasmodium vivax]	Plasmodium v...	malaria para...	5855	198	198	1	2e-60	57.62	562	AKC42167.1
apical membrane antigen [Plasmodium inui]	Plasmodium inui	NA	52288	198	198	1	2e-60	56.95	558	AKQ33098.1
apical membrane antigen-1 [Plasmodium vivax]	Plasmodium v...	malaria para...	5855	198	198	1	2e-60	57.62	562	UFQ05906.1
apical membrane protein-1 [Plasmodium vivax]	Plasmodium v...	malaria para...	5855	198	198	1	2e-60	57.62	562	ACY68759.1
apical membrane antigen 1 [Plasmodium vivax]	Plasmodium v...	malaria para...	5855	198	198	1	2e-60	57.62	562	AKC42169.1
apical membrane antigen-1 [Plasmodium vivax]	Plasmodium v...	malaria para...	5855	198	198	1	2e-60	57.62	562	ANS58321.1
apical membrane antigen I [Plasmodium vivax]	Plasmodium v...	malaria para...	5855	195	195	1	2e-60	56.29	430	APT35526.1
apical membrane antigen 1 [Plasmodium vivax]	Plasmodium v...	malaria para...	5855	198	198	1	2e-60	57.62	561	ADD39009.1
apcial membrane antigen I [Plasmodium vivax]	Plasmodium v...	malaria para...	5855	198	198	1	2e-60	56.95	555	AAA29480.1
apical membrane antigen [Plasmodium fieldi]	Plasmodium f...	NA	77518	198	198	1	2e-60	56.29	561	AKQ33088.1
apical membrane antigen 1 [Plasmodium vivax]	Plasmodium v...	malaria para...	5855	198	198	1	2e-60	57.62	562	AKC42218.1
apical membrane antigen 1 [Plasmodium vivax]	Plasmodium v...	malaria para...	5855	198	198	1	2e-60	57.62	562	AKC42185.1
apical membrane antigen [Plasmodium vivax]	Plasmodium v...	malaria para...	5855	195	195	1	2e-60	56.29	419	AEK48999.1
apical membrane antigen-1 [Plasmodium vivax]	Plasmodium v...	malaria para...	5855	198	198	1	2e-60	56.95	562	UFQ05864.1
apical membrane antigen 1 [Plasmodium vivax]	Plasmodium v...	malaria para...	5855	198	198	1	2e-60	57.62	562	AKC42170.1
apical membrane protein-1 [Plasmodium vivax]	Plasmodium v...	malaria para...	5855	198	198	1	2e-60	57.62	562	ACY68753.1
apical membrane antigen 1 [Plasmodium vivax]	Plasmodium v...	malaria para...	5855	197	197	1	2e-60	56.95	507	AGG39611.1
apical membrane antigen [Plasmodium inui]	Plasmodium inui	NA	52288	198	198	1	2e-60	56.95	562	AKQ33093.1
apical membrane antigen-1 [Plasmodium vivax]	Plasmodium v...	malaria para...	5855	198	198	1	2e-60	57.62	562	ANS58336.1
apical membrane protein-1 [Plasmodium vivax]	Plasmodium v...	malaria para...	5855	198	198	1	2e-60	57.62	562	ACY68808.1
apical membrane protein-1 [Plasmodium vivax]	Plasmodium v...	malaria para...	5855	198	198	1	3e-60	57.62	562	ACY68761.1
apical membrane antigen 1 [Plasmodium vivax]	Plasmodium v...	malaria para...	5855	198	198	1	3e-60	57.62	562	AKC42163.1
apical membrane antigen 1 [Plasmodium vivax]	Plasmodium v...	malaria para...	5855	195	195	1	3e-60	56.29	445	QEQ11990.1
apical membrane antigen-1 [Plasmodium vivax]	Plasmodium v...	malaria para...	5855	198	198	1	3e-60	57.62	562	UFQ05819.1
apical membrane protein-1 [Plasmodium vivax]	Plasmodium v...	malaria para...	5855	198	198	1	3e-60	56.95	562	ACY68788.1
apical membrane antigen 1 [Plasmodium vivax]	Plasmodium v...	malaria para...	5855	198	198	1	3e-60	57.62	562	AKC42165.1
apical membrane antigen 1 [Plasmodium vivax]	Plasmodium v...	malaria para...	5855	198	198	1	3e-60	57.62	562	AKC42166.1
apical membrane antigen 1 [Plasmodium vivax]	Plasmodium v...	malaria para...	5855	198	198	1	3e-60	57.62	562	AKC42208.1
apical membrane protein-1 [Plasmodium vivax]	Plasmodium v...	malaria para...	5855	198	198	1	3e-60	57.62	562	ACY68738.1
apical membrane antigen 1 [Plasmodium vivax]	Plasmodium v...	malaria para...	5855	198	198	1	3e-60	57.62	562	AKC42203.1
apical membrane protein-1 [Plasmodium vivax]	Plasmodium v...	malaria para...	5855	198	198	1	3e-60	57.62	562	ACY68779.1
apical membrane antigen 1 [Plasmodium vivax]	Plasmodium v...	malaria para...	5855	198	198	1	3e-60	57.62	562	AKC42207.1
apical membrane antigen-1 [Plasmodium vivax]	Plasmodium v...	malaria para...	5855	198	198	1	3e-60	57.62	562	UFQ05877.1
apical membrane protein-1 [Plasmodium vivax]	Plasmodium v...	malaria para...	5855	198	198	1	3e-60	56.95	562	ACY68837.1
apical membrane antigen [Plasmodium vivax]	Plasmodium v...	malaria para...	5855	194	194	1	3e-60	56.95	409	AEK48997.1
apical membrane antigen I [Plasmodium vivax]	Plasmodium v...	malaria para...	5855	195	195	1	3e-60	56.29	430	APT35524.1
apical membrane antigen 1 [Plasmodium vivax]	Plasmodium v...	malaria para...	5855	197	197	1	3e-60	56.95	508	AGS41015.1
apical membrane protein-1 [Plasmodium vivax]	Plasmodium v...	malaria para...	5855	198	198	1	3e-60	56.95	562	ACY68881.1
apical membrane antigen-1 [Plasmodium vivax]	Plasmodium v...	malaria para...	5855	198	198	1	3e-60	57.62	562	UFQ05868.1
apical membrane antigen 1 [Plasmodium vivax]	Plasmodium v...	malaria para...	5855	195	195	1	3e-60	56.29	445	QEQ12023.1
apical membrane antigen 1 [Plasmodium vivax]	Plasmodium v...	malaria para...	5855	197	197	1	3e-60	56.29	508	AGS40968.1
apical membrane protein-1 [Plasmodium vivax]	Plasmodium v...	malaria para...	5855	198	198	1	3e-60	56.95	562	ACY68795.1
apical membrane antigen I [Plasmodium vivax]	Plasmodium v...	malaria para...	5855	195	195	1	3e-60	56.29	430	APT35537.1
apical membrane antigen 1 [Plasmodium vivax]	Plasmodium v...	malaria para...	5855	197	197	1	3e-60	56.29	508	AGS41004.1
apical membrane antigen 1 [Plasmodium vivax]	Plasmodium v...	malaria para...	5855	197	197	1	3e-60	56.29	508	AGS40953.1
apical membrane antigen 1 [Plasmodium vivax]	Plasmodium v...	malaria para...	5855	197	197	1	3e-60	56.29	508	AGS41000.1
apical membrane antigen I [Plasmodium vivax]	Plasmodium v...	malaria para...	5855	195	195	1	3e-60	56.29	430	APT35529.1
apical membrane antigen I [Plasmodium vivax]	Plasmodium v...	malaria para...	5855	195	195	1	3e-60	56.29	430	APT35545.1
apical merozoite protein 1 [Plasmodium vivax]	Plasmodium v...	malaria para...	5855	198	198	1	3e-60	56.95	562	ACB42439.1
apical membrane protein-1 [Plasmodium vivax]	Plasmodium v...	malaria para...	5855	198	198	1	3e-60	56.95	562	ACY68781.1
apical membrane antigen 1 [Plasmodium inui San Antonio 1]	Plasmodium i...	NA	1237626	198	198	1	3e-60	56.95	562	XP_008816151.1
apical membrane antigen 1 [Plasmodium vivax]	Plasmodium v...	malaria para...	5855	195	195	1	3e-60	56.29	445	QEQ12046.1
apical membrane antigen 1 [Plasmodium vivax]	Plasmodium v...	malaria para...	5855	197	197	1	3e-60	56.95	540	ACB55383.1
apical membrane antigen 1 [Plasmodium vivax]	Plasmodium v...	malaria para...	5855	195	195	1	3e-60	56.29	445	QEQ11996.1
apical membrane antigen I [Plasmodium vivax]	Plasmodium v...	malaria para...	5855	194	194	1	3e-60	56.29	430	APT35532.1
apical membrane antigen I [Plasmodium vivax]	Plasmodium v...	malaria para...	5855	194	194	1	4e-60	56.29	430	APT35515.1
apical membrane antigen 1 [Plasmodium vivax]	Plasmodium v...	malaria para...	5855	195	195	1	4e-60	56.29	445	QEQ11966.1
apical membrane protein-1 [Plasmodium vivax]	Plasmodium v...	malaria para...	5855	197	197	1	4e-60	56.95	562	ACY68782.1
apical membrane antigen I [Plasmodium vivax]	Plasmodium v...	malaria para...	5855	194	194	1	4e-60	56.29	430	APT35549.1
apical membrane antigen 1 [Plasmodium vivax]	Plasmodium v...	malaria para...	5855	196	196	1	4e-60	56.95	507	AGG39614.1
apical membrane antigen-1 [Plasmodium vivax]	Plasmodium v...	malaria para...	5855	197	197	1	4e-60	56.95	562	UFQ05822.1
Chain A, Apical merozoite antigen 1 [Plasmodium knowlesi]	Plasmodium k...	NA	5850	193	193	1	4e-60	54.97	370	4UAO_A
apical membrane antigen-1 [Plasmodium vivax]	Plasmodium v...	malaria para...	5855	196	196	1	4e-60	56.95	501	ABN11189.1
apical membrane antigen 1 [Plasmodium vivax]	Plasmodium v...	malaria para...	5855	196	196	1	4e-60	56.95	507	AGG39612.1
apical membrane antigen-1 [Plasmodium vivax]	Plasmodium v...	malaria para...	5855	196	196	1	4e-60	56.95	501	ABN11186.1
apical membrane antigen I [Plasmodium vivax]	Plasmodium v...	malaria para...	5855	194	194	1	4e-60	56.29	430	APT35517.1
apical membrane antigen 1 [Plasmodium vivax]	Plasmodium v...	malaria para...	5855	195	195	1	4e-60	56.29	445	QEQ12021.1
apical membrane antigen 1 [Plasmodium vivax]	Plasmodium v...	malaria para...	5855	195	195	1	4e-60	56.29	445	QEQ12047.1
apical membrane antigen-1 [Plasmodium vivax]	Plasmodium v...	malaria para...	5855	196	196	1	4e-60	56.29	501	ABN11197.1
apical membrane antigen-1 [Plasmodium vivax]	Plasmodium v...	malaria para...	5855	197	197	1	4e-60	57.62	562	UFQ05795.1
apical membrane antigen 1 [Plasmodium vivax]	Plasmodium v...	malaria para...	5855	195	195	1	4e-60	56.29	445	QEQ12001.1
apical membrane antigen 1 [Plasmodium vivax]	Plasmodium v...	malaria para...	5855	195	195	1	4e-60	56.29	445	QEQ12005.1
apical membrane antigen-1 [Plasmodium vivax]	Plasmodium v...	malaria para...	5855	196	196	1	4e-60	56.95	501	ABN11183.1
apical membrane antigen 1 [Plasmodium vivax]	Plasmodium v...	malaria para...	5855	196	196	1	4e-60	56.95	507	AGG39622.1
apical membrane antigen 1 [Plasmodium vivax]	Plasmodium v...	malaria para...	5855	195	195	1	4e-60	56.29	445	QEQ12010.1
apical membrane antigen 1 [Plasmodium vivax]	Plasmodium v...	malaria para...	5855	195	195	1	5e-60	56.29	445	QEQ11998.1
apical membrane antigen 1 [Plasmodium vivax]	Plasmodium v...	malaria para...	5855	194	194	1	5e-60	56.29	445	QEQ11989.1
apical membrane antigen 1 [Plasmodium vivax]	Plasmodium v...	malaria para...	5855	194	194	1	5e-60	56.29	445	QEQ12004.1
apical membrane antigen 1 [Plasmodium vivax]	Plasmodium v...	malaria para...	5855	194	194	1	5e-60	56.29	445	QEQ11974.1
apical membrane antigen-1 [Plasmodium vivax]	Plasmodium v...	malaria para...	5855	197	197	1	5e-60	57.62	562	ANS58324.1
apical membrane antigen-1 [Plasmodium vivax]	Plasmodium v...	malaria para...	5855	196	196	1	5e-60	56.29	501	ABN11187.1
apical membrane protein-1 [Plasmodium vivax]	Plasmodium v...	malaria para...	5855	197	197	1	5e-60	57.62	562	ACY68736.1
apical membrane antigen-1 [Plasmodium vivax]	Plasmodium v...	malaria para...	5855	197	197	1	5e-60	57.62	562	UFQ05839.1
apical membrane protein-1 [Plasmodium vivax]	Plasmodium v...	malaria para...	5855	197	197	1	5e-60	57.62	562	ACY68850.1
apical membrane antigen 1 [Plasmodium vivax]	Plasmodium v...	malaria para...	5855	196	196	1	5e-60	56.95	507	AGG39621.1
apical membrane antigen 1 [Plasmodium vivax]	Plasmodium v...	malaria para...	5855	194	194	1	5e-60	56.29	445	QEQ12062.1
apical membrane antigen 1 [Plasmodium malariae]	Plasmodium m...	NA	5858	196	196	1	5e-60	57.62	527	AUR33962.1
apical membrane antigen 1 [Plasmodium brasilianum]	Plasmodium b...	NA	5824	197	197	1	5e-60	58.28	562	KAI4838454.1
apical membrane antigen-1 [Plasmodium vivax]	Plasmodium v...	malaria para...	5855	197	197	1	5e-60	56.95	562	UFQ05873.1
apical membrane antigen-1 [Plasmodium vivax]	Plasmodium v...	malaria para...	5855	197	197	1	5e-60	57.62	562	ANS58332.1
apical membrane antigen 1 [Plasmodium vivax]	Plasmodium v...	malaria para...	5855	196	196	1	5e-60	56.29	507	AGG39619.1
apical membrane protein-1 [Plasmodium vivax]	Plasmodium v...	malaria para...	5855	197	197	1	5e-60	57.62	562	ACY68744.1
apical membrane protein-1 [Plasmodium vivax]	Plasmodium v...	malaria para...	5855	197	197	1	5e-60	57.62	562	ACY68799.1
apical membrane protein-1 [Plasmodium vivax]	Plasmodium v...	malaria para...	5855	197	197	1	5e-60	56.95	562	ACY68751.1
apical membrane antigen-1 [Plasmodium vivax]	Plasmodium v...	malaria para...	5855	197	197	1	5e-60	57.62	562	ANS58327.1
apical membrane antigen 1 [Plasmodium vivax]	Plasmodium v...	malaria para...	5855	197	197	1	5e-60	57.62	562	AKC42184.1
apical membrane antigen 1 [Plasmodium vivax]	Plasmodium v...	malaria para...	5855	196	196	1	5e-60	56.29	507	AGG39623.1
apical membrane antigen 1 [Plasmodium vivax]	Plasmodium v...	malaria para...	5855	196	196	1	5e-60	56.29	507	AGG39599.1
apical membrane antigen 1 [Plasmodium vivax]	Plasmodium v...	malaria para...	5855	196	196	1	5e-60	56.29	508	AGS40995.1
apical membrane antigen 1 [Plasmodium vivax]	Plasmodium v...	malaria para...	5855	194	194	1	5e-60	56.29	445	QEQ11988.1
apical membrane antigen-1 [Plasmodium vivax]	Plasmodium v...	malaria para...	5855	197	197	1	5e-60	56.95	562	UFQ05928.1
apical membrane protein-1 [Plasmodium vivax]	Plasmodium v...	malaria para...	5855	197	197	1	6e-60	57.62	562	ACY68771.1
apical membrane antigen 1 [Plasmodium vivax]	Plasmodium v...	malaria para...	5855	196	196	1	6e-60	56.29	508	AGS41001.1
apical membrane antigen-1 [Plasmodium vivax]	Plasmodium v...	malaria para...	5855	196	196	1	6e-60	56.29	501	ABN11198.1
apical membrane antigen [Plasmodium vivax]	Plasmodium v...	malaria para...	5855	194	194	1	6e-60	56.29	420	AEK48996.1
apical membrane antigen [Plasmodium vivax]	Plasmodium v...	malaria para...	5855	197	197	1	6e-60	56.95	561	AKQ33081.1
apical membrane antigen 1 [Plasmodium vivax]	Plasmodium v...	malaria para...	5855	196	196	1	6e-60	56.29	507	AGG39598.1
apical membrane antigen 1 [Plasmodium vivax]	Plasmodium v...	malaria para...	5855	196	196	1	6e-60	56.29	508	AGS40964.1
apical membrane antigen 1 [Plasmodium vivax]	Plasmodium v...	malaria para...	5855	194	194	1	6e-60	56.29	445	QEQ11968.1
apical membrane protein-1 [Plasmodium vivax]	Plasmodium v...	malaria para...	5855	197	197	1	6e-60	57.62	562	ACY68774.1
apical membrane antigen 1 [Plasmodium vivax]	Plasmodium v...	malaria para...	5855	196	196	1	6e-60	56.29	508	AGS40981.1
apical membrane antigen 1 [Plasmodium vivax]	Plasmodium v...	malaria para...	5855	196	196	1	6e-60	56.29	508	AGS41006.1
apical membrane antigen 1 [Plasmodium vivax]	Plasmodium v...	malaria para...	5855	196	196	1	6e-60	56.29	508	AGS40999.1
apical membrane antigen-1 [Plasmodium vivax]	Plasmodium v...	malaria para...	5855	197	197	1	6e-60	56.95	562	UFQ05810.1
apical membrane antigen 1 [Plasmodium vivax]	Plasmodium v...	malaria para...	5855	196	196	1	6e-60	56.29	508	AGS41017.1
apical membrane antigen I [Plasmodium vivax]	Plasmodium v...	malaria para...	5855	194	194	1	6e-60	56.29	430	APT35576.1
apical membrane antigen 1 [Plasmodium malariae]	Plasmodium m...	NA	5858	196	196	1	6e-60	57.62	527	AUR33957.1
apical membrane antigen 1 [Plasmodium vivax]	Plasmodium v...	malaria para...	5855	196	196	1	6e-60	56.29	508	AGS40972.1
apical membrane antigen 1 [Plasmodium malariae]	Plasmodium m...	NA	5858	196	196	1	6e-60	57.62	527	AUR33956.1
apical membrane antigen 1 [Plasmodium vivax]	Plasmodium v...	malaria para...	5855	196	196	1	6e-60	56.29	508	AGS40965.1
apical membrane antigen 1 [Plasmodium malariae]	Plasmodium m...	NA	5858	196	196	1	7e-60	57.62	527	AUR33965.1
apical membrane antigen 1 [Plasmodium malariae]	Plasmodium m...	NA	5858	196	196	1	7e-60	57.62	527	AUR33963.1
apical membrane antigen 1 [Plasmodium vivax]	Plasmodium v...	malaria para...	5855	196	196	1	7e-60	56.29	508	AGS40990.1
apical membrane antigen 1 [Plasmodium malariae]	Plasmodium m...	NA	5858	196	196	1	7e-60	57.62	527	AUR33964.1
apical membrane antigen I [Plasmodium vivax]	Plasmodium v...	malaria para...	5855	194	194	1	7e-60	56.29	430	APT35536.1
apical membrane antigen I [Plasmodium vivax]	Plasmodium v...	malaria para...	5855	194	194	1	7e-60	56.29	430	APT35534.1
apical membrane antigen 1 [Plasmodium vivax]	Plasmodium v...	malaria para...	5855	196	196	1	7e-60	56.29	508	AGS40996.1
apical membrane antigen 1 [Plasmodium vivax]	Plasmodium v...	malaria para...	5855	196	196	1	7e-60	56.29	508	AGS41005.1
apical membrane antigen 1 [Plasmodium vivax]	Plasmodium v...	malaria para...	5855	196	196	1	7e-60	56.29	508	AGS40984.1
apical membrane antigen 1 [Plasmodium vivax]	Plasmodium v...	malaria para...	5855	196	196	1	7e-60	56.29	508	AGS40943.1
apical membrane antigen 1 [Plasmodium vivax]	Plasmodium v...	malaria para...	5855	196	196	1	7e-60	56.29	508	AGS40946.1
apical membrane antigen 1 [Plasmodium vivax]	Plasmodium v...	malaria para...	5855	196	196	1	7e-60	56.29	507	AGG39624.1
apical membrane antigen 1 [Plasmodium vivax]	Plasmodium v...	malaria para...	5855	196	196	1	7e-60	56.29	508	AGS40937.1
apical membrane antigen-1 [Plasmodium vivax]	Plasmodium v...	malaria para...	5855	196	196	1	7e-60	56.29	501	ABN11185.1
apical membrane protein-1 [Plasmodium vivax]	Plasmodium v...	malaria para...	5855	197	197	1	7e-60	56.95	562	ACY68726.1
apical membrane antigen 1 [Plasmodium vivax]	Plasmodium v...	malaria para...	5855	196	196	1	7e-60	56.29	508	AGS40985.1
apical membrane antigen 1 [Plasmodium vivax]	Plasmodium v...	malaria para...	5855	197	197	1	7e-60	56.95	562	AKC42171.1
apical membrane antigen 1 [Plasmodium vivax]	Plasmodium v...	malaria para...	5855	196	196	1	7e-60	56.29	508	AGS40998.1
apical membrane antigen [Plasmodium inui]	Plasmodium inui	NA	52288	197	197	1	7e-60	56.95	562	AKQ33095.1
apical membrane antigen 1 [Plasmodium vivax]	Plasmodium v...	malaria para...	5855	196	196	1	8e-60	56.29	508	AGS41018.1
apical membrane antigen 1 [Plasmodium vivax]	Plasmodium v...	malaria para...	5855	196	196	1	8e-60	56.29	507	AGG39608.1
apical membrane antigen 1 [Plasmodium vivax]	Plasmodium v...	malaria para...	5855	196	196	1	8e-60	56.29	508	AGS40982.1
apical membrane antigen-1 [Plasmodium vivax]	Plasmodium v...	malaria para...	5855	197	197	1	8e-60	56.95	562	ANS58328.1
apical membrane antigen 1 [Plasmodium vivax]	Plasmodium v...	malaria para...	5855	196	196	1	8e-60	56.29	508	AGS40978.1
apical membrane protein-1 [Plasmodium vivax]	Plasmodium v...	malaria para...	5855	197	197	1	8e-60	56.95	562	ACY68778.1
apical membrane protein-1 [Plasmodium vivax]	Plasmodium v...	malaria para...	5855	197	197	1	8e-60	56.95	562	ACY68733.1
apical membrane antigen 1 [Plasmodium vivax]	Plasmodium v...	malaria para...	5855	196	196	1	8e-60	56.29	508	AGS41023.1
apical membrane antigen 1 [Plasmodium vivax]	Plasmodium v...	malaria para...	5855	197	197	1	8e-60	56.95	562	AKC42194.1
apical membrane antigen 1 [Plasmodium vivax]	Plasmodium v...	malaria para...	5855	196	196	1	8e-60	56.29	508	AGS40971.1
apical membrane antigen 1 [Plasmodium vivax]	Plasmodium v...	malaria para...	5855	196	196	1	8e-60	56.29	507	AGG39607.1
apical membrane antigen 1 [Plasmodium vivax]	Plasmodium v...	malaria para...	5855	196	196	1	8e-60	56.95	540	ACB55347.1
apical membrane antigen 1 [Plasmodium vivax]	Plasmodium v...	malaria para...	5855	197	197	1	8e-60	56.95	562	AKC42200.1
apical membrane antigen [Plasmodium inui]	Plasmodium inui	NA	52288	197	197	1	8e-60	56.95	562	AKQ33091.1
apical membrane antigen 1 [Plasmodium vivax]	Plasmodium v...	malaria para...	5855	196	196	1	8e-60	56.95	540	ACB55385.1
apical membrane antigen 1 [Plasmodium vivax]	Plasmodium v...	malaria para...	5855	196	196	1	8e-60	56.95	540	ACB55341.1
apical membrane antigen 1 [Plasmodium vivax]	Plasmodium v...	malaria para...	5855	196	196	1	8e-60	56.95	534	ABM63520.1
apical membrane protein-1 [Plasmodium vivax]	Plasmodium v...	malaria para...	5855	197	197	1	9e-60	56.95	562	ACY68737.1
apical membrane antigen I [Plasmodium vivax]	Plasmodium v...	malaria para...	5855	194	194	1	9e-60	56.29	430	APT35530.1
apical membrane antigen 1 [Plasmodium vivax]	Plasmodium v...	malaria para...	5855	196	196	1	9e-60	56.95	540	ACB55320.1
apical membrane antigen I [Plasmodium vivax]	Plasmodium v...	malaria para...	5855	194	194	1	9e-60	56.29	430	APT35563.1
apical membrane antigen 1 [Plasmodium vivax]	Plasmodium v...	malaria para...	5855	195	195	1	9e-60	56.95	508	AGS40945.1
apical membrane antigen 1 [Plasmodium vivax]	Plasmodium v...	malaria para...	5855	196	196	1	9e-60	56.95	546	ABM63516.1
apical membrane antigen 1 [Plasmodium vivax]	Plasmodium v...	malaria para...	5855	196	196	1	9e-60	56.95	546	ABM63522.1
apical membrane antigen I [Plasmodium vivax]	Plasmodium v...	malaria para...	5855	193	193	1	1e-59	56.29	430	APT35527.1
apical membrane antigen 1 [Plasmodium vivax]	Plasmodium v...	malaria para...	5855	195	195	1	1e-59	56.95	508	AGS41027.1
apical membrane antigen 1 [Plasmodium vivax]	Plasmodium v...	malaria para...	5855	196	196	1	1e-59	56.95	541	ABM63518.1
apical membrane antigen 1 [Plasmodium vivax]	Plasmodium v...	malaria para...	5855	195	195	1	1e-59	56.29	507	AGG39609.1
apical membrane antigen 1 [Plasmodium vivax]	Plasmodium v...	malaria para...	5855	195	195	1	1e-59	56.29	507	AGG39602.1
apical membrane antigen 1 [Plasmodium vivax]	Plasmodium v...	malaria para...	5855	195	195	1	1e-59	56.29	507	AGG39605.1
apical membrane antigen I [Plasmodium vivax]	Plasmodium v...	malaria para...	5855	193	193	1	1e-59	56.29	430	APT35514.1
apical membrane antigen 1 [Plasmodium vivax]	Plasmodium v...	malaria para...	5855	195	195	1	1e-59	56.29	507	AGG39601.1
apical merozoite protein 1 [Plasmodium vivax]	Plasmodium v...	malaria para...	5855	196	196	1	1e-59	56.95	562	ACB42433.1
apical membrane antigen-1 [Plasmodium vivax]	Plasmodium v...	malaria para...	5855	195	195	1	1e-59	56.29	501	ABN11196.1
apical membrane antigen 1 [Plasmodium vivax]	Plasmodium v...	malaria para...	5855	195	195	1	1e-59	56.29	507	AGG39604.1
apical membrane antigen-1 [Plasmodium vivax]	Plasmodium v...	malaria para...	5855	196	196	1	1e-59	56.95	562	UFQ05846.1
apical merozoite antigen 1 [Plasmodium vivax]	Plasmodium v...	malaria para...	5855	196	196	1	1e-59	56.95	562	XP_001615447.1
apical membrane antigen 1 [Plasmodium fragile]	Plasmodium f...	NA	5857	196	196	1	1e-59	56.95	562	XP_012333145.1
apical membrane antigen 1 [Plasmodium vivax]	Plasmodium v...	malaria para...	5855	196	196	1	1e-59	56.95	562	AZL41038.1
apical membrane antigen I [Plasmodium vivax]	Plasmodium v...	malaria para...	5855	193	193	1	1e-59	55.63	430	APT35522.1
apical membrane antigen 1 [Plasmodium vivax]	Plasmodium v...	malaria para...	5855	196	196	1	1e-59	56.95	562	AKC42213.1
apical membrane antigen-1 [Plasmodium vivax]	Plasmodium v...	malaria para...	5855	195	195	1	1e-59	56.29	501	ABN11202.1
apical membrane antigen-1 [Plasmodium vivax]	Plasmodium v...	malaria para...	5855	195	195	1	1e-59	56.29	501	ABN11192.1
apical membrane protein-1 [Plasmodium vivax]	Plasmodium v...	malaria para...	5855	196	196	1	1e-59	56.95	562	ACY68762.1
apical membrane antigen I [Plasmodium vivax]	Plasmodium v...	malaria para...	5855	193	193	1	1e-59	55.63	430	APT35531.1
apical membrane antigen 1 [Plasmodium vivax]	Plasmodium v...	malaria para...	5855	195	195	1	1e-59	56.29	507	AGG39616.1
apical membrane antigen 1 [Plasmodium vivax]	Plasmodium v...	malaria para...	5855	196	196	1	1e-59	56.29	546	ABM63525.1
apical membrane antigen 1 [Plasmodium vivax]	Plasmodium v...	malaria para...	5855	193	193	1	1e-59	55.63	445	QEQ12009.1
apical membrane antigen [Plasmodium inui]	Plasmodium inui	NA	52288	196	196	1	1e-59	56.95	562	AKQ33094.1
apical membrane antigen-1 [Plasmodium vivax]	Plasmodium v...	malaria para...	5855	196	196	1	1e-59	56.95	562	UFQ05801.1
apical membrane protein-1 [Plasmodium vivax]	Plasmodium v...	malaria para...	5855	196	196	1	1e-59	56.95	562	ACY68790.1
apical membrane antigen 1 [Plasmodium vivax]	Plasmodium v...	malaria para...	5855	196	196	1	1e-59	56.95	562	AZL41029.1
apical membrane antigen 1 [Plasmodium vivax]	Plasmodium v...	malaria para...	5855	196	196	1	1e-59	56.95	562	AZL41030.1
apical membrane protein-1 [Plasmodium vivax]	Plasmodium v...	malaria para...	5855	196	196	1	1e-59	56.95	562	ACY68739.1
apical membrane antigen 1 [Plasmodium vivax]	Plasmodium v...	malaria para...	5855	196	196	1	1e-59	56.95	562	AZL41037.1
apical membrane antigen 1 [Plasmodium vivax]	Plasmodium v...	malaria para...	5855	196	196	1	1e-59	56.95	562	AZL41036.1
apical membrane antigen 1 [Plasmodium vivax]	Plasmodium v...	malaria para...	5855	193	193	1	1e-59	55.63	445	QEQ12052.1
apical membrane protein-1 [Plasmodium vivax]	Plasmodium v...	malaria para...	5855	196	196	1	1e-59	56.95	562	ACY68809.1
apical membrane protein-1 [Plasmodium vivax]	Plasmodium v...	malaria para...	5855	196	196	1	1e-59	56.95	562	ACY68777.1
apical membrane antigen 1 [Plasmodium vivax]	Plasmodium v...	malaria para...	5855	196	196	1	1e-59	56.29	546	ABM63523.1
apical membrane protein-1 [Plasmodium vivax]	Plasmodium v...	malaria para...	5855	196	196	1	2e-59	56.29	562	ACY68763.1
apical membrane antigen 1 [Plasmodium vivax]	Plasmodium v...	malaria para...	5855	195	195	1	2e-59	56.29	507	AGG39597.1
apical membrane protein-1 [Plasmodium vivax]	Plasmodium v...	malaria para...	5855	196	196	1	2e-59	56.29	562	ACY68787.1
apical membrane protein-1 [Plasmodium vivax]	Plasmodium v...	malaria para...	5855	196	196	1	2e-59	56.29	562	ACY68748.1
apical membrane protein-1 [Plasmodium vivax]	Plasmodium v...	malaria para...	5855	196	196	1	2e-59	56.29	562	ACY68770.1
apical membrane antigen 1 [Plasmodium vivax]	Plasmodium v...	malaria para...	5855	193	193	1	2e-59	55.63	445	QEQ11979.1
apical membrane antigen 1 [Plasmodium vivax]	Plasmodium v...	malaria para...	5855	196	196	1	2e-59	56.29	562	SCO72819.1
apical membrane protein-1 [Plasmodium vivax]	Plasmodium v...	malaria para...	5855	196	196	1	2e-59	56.29	562	ACY68833.1
apical membrane antigen-1 [Plasmodium vivax]	Plasmodium v...	malaria para...	5855	196	196	1	2e-59	56.29	562	UFQ05856.1
apical membrane antigen-1 [Plasmodium vivax]	Plasmodium v...	malaria para...	5855	196	196	1	2e-59	56.29	562	UFQ05872.1
apical membrane antigen-1 [Plasmodium vivax]	Plasmodium v...	malaria para...	5855	196	196	1	2e-59	56.29	562	UFQ05811.1
apical membrane antigen-1 [Plasmodium vivax]	Plasmodium v...	malaria para...	5855	196	196	1	2e-59	56.29	562	UFQ05821.1
apical membrane protein-1 [Plasmodium vivax]	Plasmodium v...	malaria para...	5855	196	196	1	2e-59	56.29	562	ACY68792.1
apical membrane antigen 1 [Plasmodium vivax]	Plasmodium v...	malaria para...	5855	196	196	1	2e-59	56.29	546	ABM63519.1
apical membrane protein-1 [Plasmodium vivax]	Plasmodium v...	malaria para...	5855	196	196	1	2e-59	56.29	562	ACY68730.1
apical membrane antigen-1 [Plasmodium vivax]	Plasmodium v...	malaria para...	5855	196	196	1	2e-59	56.95	562	ANS58330.1
apical membrane antigen 1 [Plasmodium vivax]	Plasmodium v...	malaria para...	5855	195	195	1	2e-59	55.63	540	ACB55360.1
apical membrane antigen 1 [Plasmodium vivax]	Plasmodium v...	malaria para...	5855	196	196	1	2e-59	56.95	562	AKC42198.1
apical membrane protein-1 [Plasmodium vivax]	Plasmodium v...	malaria para...	5855	196	196	1	2e-59	56.95	562	ACY68789.1
apical membrane protein-1 [Plasmodium vivax]	Plasmodium v...	malaria para...	5855	196	196	1	2e-59	56.95	562	ACY68746.1
apical membrane protein-1 [Plasmodium vivax]	Plasmodium v...	malaria para...	5855	196	196	1	2e-59	56.29	562	ACY68727.1
apical membrane antigen-1 [Plasmodium vivax]	Plasmodium v...	malaria para...	5855	196	196	1	2e-59	56.29	562	UFQ05883.1
apical membrane antigen-1 [Plasmodium vivax]	Plasmodium v...	malaria para...	5855	196	196	1	2e-59	56.29	562	UFQ05862.1
apical membrane protein-1 [Plasmodium vivax]	Plasmodium v...	malaria para...	5855	196	196	1	2e-59	56.95	562	ACY68829.1
apical membrane protein-1 [Plasmodium vivax]	Plasmodium v...	malaria para...	5855	196	196	1	2e-59	56.29	562	ACY68800.1
apical membrane antigen I [Plasmodium vivax]	Plasmodium v...	malaria para...	5855	192	192	1	2e-59	56.29	430	APT35523.1
apical membrane antigen 1 [Plasmodium vivax]	Plasmodium v...	malaria para...	5855	195	195	1	2e-59	56.29	535	ABM63526.1
apical membrane protein-1 [Plasmodium vivax]	Plasmodium v...	malaria para...	5855	196	196	1	2e-59	56.29	562	ACY68760.1
apical membrane antigen-1 [Plasmodium vivax]	Plasmodium v...	malaria para...	5855	194	194	1	2e-59	56.29	501	ABN11205.1
apical membrane protein-1 [Plasmodium vivax]	Plasmodium v...	malaria para...	5855	196	196	1	2e-59	56.29	562	ACY68735.1
apical membrane antigen 1 [Plasmodium vivax]	Plasmodium v...	malaria para...	5855	195	195	1	2e-59	56.29	540	ACB55334.1
apical membrane antigen-1 [Plasmodium vivax]	Plasmodium v...	malaria para...	5855	196	196	1	2e-59	56.29	562	UFQ05834.1
apical membrane protein-1 [Plasmodium vivax]	Plasmodium v...	malaria para...	5855	196	196	1	2e-59	56.29	562	ACY68804.1
RecName: Full=Apical membrane antigen 1; AltName: Full=Merozoi...	Plasmodium f...	NA	5857	196	196	1	2e-59	56.95	562	P22622.1
apical membrane antigen 1 [Plasmodium vivax]	Plasmodium v...	malaria para...	5855	194	194	1	2e-59	55.63	508	AGS41003.1
apical membrane antigen 1 [Plasmodium vivax]	Plasmodium v...	malaria para...	5855	193	193	1	2e-59	55.63	445	QEQ11973.1
apical membrane antigen-1 [Plasmodium vivax]	Plasmodium v...	malaria para...	5855	196	196	1	2e-59	56.29	562	UFQ05889.1
apical membrane antigen I [Plasmodium vivax]	Plasmodium v...	malaria para...	5855	192	192	1	3e-59	55.63	430	APT35535.1
apical membrane antigen 1 [Plasmodium vivax]	Plasmodium v...	malaria para...	5855	194	194	1	3e-59	55.63	508	AGS40932.1
apical membrane protein-1 [Plasmodium vivax]	Plasmodium v...	malaria para...	5855	195	195	1	3e-59	56.29	562	ACY68889.1
apical membrane antigen-1 [Plasmodium vivax]	Plasmodium v...	malaria para...	5855	194	194	1	3e-59	56.29	501	ABN11188.1
apical membrane protein-1 [Plasmodium vivax]	Plasmodium v...	malaria para...	5855	195	195	1	3e-59	56.29	562	ACY68734.1
apical membrane antigen 1 [Plasmodium vivax]	Plasmodium v...	malaria para...	5855	195	195	1	3e-59	56.29	540	ACB55369.1
apical membrane antigen 1 [Plasmodium vivax]	Plasmodium v...	malaria para...	5855	194	194	1	3e-59	56.29	531	ACB55367.1
apical membrane antigen [Plasmodium inui]	Plasmodium inui	NA	52288	195	195	1	3e-59	56.29	562	AKQ33100.1
apical membrane antigen 1 [Plasmodium vivax]	Plasmodium v...	malaria para...	5855	195	195	1	3e-59	56.29	540	ACB55319.1
apical membrane antigen-1 [Plasmodium vivax]	Plasmodium v...	malaria para...	5855	195	195	1	3e-59	56.29	562	UFQ05871.1
apical membrane antigen-1 [Plasmodium vivax]	Plasmodium v...	malaria para...	5855	195	195	1	3e-59	56.29	562	UFQ05859.1
apical membrane antigen-1 [Plasmodium vivax]	Plasmodium v...	malaria para...	5855	195	195	1	3e-59	56.95	562	ANS58334.1
apical membrane antigen 1 [Plasmodium vivax]	Plasmodium v...	malaria para...	5855	194	194	1	3e-59	56.29	530	ACB55327.1
apical membrane antigen 1 [Plasmodium vivax]	Plasmodium v...	malaria para...	5855	194	194	1	3e-59	56.29	507	AGG39620.1
apical membrane protein-1 [Plasmodium vivax]	Plasmodium v...	malaria para...	5855	195	195	1	3e-59	56.29	562	ACY68796.1
apical membrane antigen-1 [Plasmodium vivax]	Plasmodium v...	malaria para...	5855	195	195	1	3e-59	56.29	562	UFQ05806.1
apical membrane antigen 1 [Plasmodium vivax]	Plasmodium v...	malaria para...	5855	195	195	1	3e-59	56.29	540	ACB55322.1
apical membrane antigen-1 [Plasmodium vivax]	Plasmodium v...	malaria para...	5855	195	195	1	3e-59	56.29	562	UFQ05814.1
apical membrane protein-1 [Plasmodium vivax]	Plasmodium v...	malaria para...	5855	195	195	1	3e-59	56.29	562	ACY68776.1
apical membrane antigen-1 [Plasmodium vivax]	Plasmodium v...	malaria para...	5855	195	195	1	3e-59	56.29	562	UFQ05923.1
apical membrane protein-1 [Plasmodium vivax]	Plasmodium v...	malaria para...	5855	195	195	1	3e-59	56.29	562	ACY68783.1
apical membrane antigen-1 [Plasmodium vivax]	Plasmodium v...	malaria para...	5855	195	195	1	3e-59	56.29	562	UFQ05800.1
apical membrane antigen-1 [Plasmodium vivax]	Plasmodium v...	malaria para...	5855	195	195	1	3e-59	56.29	562	UFQ05828.1
apical membrane antigen [Plasmodium sp.]	Plasmodium sp.	NA	31272	195	195	1	3e-59	55.63	557	AKQ33111.1
apical membrane antigen 1 [Plasmodium vivax]	Plasmodium v...	malaria para...	5855	195	195	1	3e-59	56.29	562	AKC42181.1
apical membrane antigen-1 [Plasmodium vivax]	Plasmodium v...	malaria para...	5855	195	195	1	3e-59	56.29	562	UFQ05812.1
apical membrane antigen-1 [Plasmodium vivax]	Plasmodium v...	malaria para...	5855	195	195	1	4e-59	56.29	562	UFQ05890.1
apical membrane protein-1 [Plasmodium vivax]	Plasmodium v...	malaria para...	5855	195	195	1	4e-59	56.29	562	ACY68785.1
apical membrane antigen-1 [Plasmodium vivax]	Plasmodium v...	malaria para...	5855	195	195	1	4e-59	56.29	562	UFQ05825.1
apical membrane protein-1 [Plasmodium vivax]	Plasmodium v...	malaria para...	5855	195	195	1	4e-59	56.29	562	ACY68875.1
apical membrane antigen-1 [Plasmodium vivax]	Plasmodium v...	malaria para...	5855	195	195	1	4e-59	56.29	562	UFQ05842.1
apical membrane protein-1 [Plasmodium vivax]	Plasmodium v...	malaria para...	5855	195	195	1	4e-59	56.29	562	ACY68786.1
apical membrane antigen-1 [Plasmodium vivax]	Plasmodium v...	malaria para...	5855	195	195	1	4e-59	56.29	562	UFQ05875.1
apical membrane antigen-1 [Plasmodium vivax]	Plasmodium v...	malaria para...	5855	195	195	1	4e-59	56.29	562	ANS58322.1
apical membrane protein-1 [Plasmodium vivax]	Plasmodium v...	malaria para...	5855	195	195	1	4e-59	56.29	562	ACY68769.1
apical membrane antigen 1 [Plasmodium vivax]	Plasmodium v...	malaria para...	5855	195	195	1	4e-59	56.29	562	AKC42168.1
apical membrane antigen-1 [Plasmodium vivax]	Plasmodium v...	malaria para...	5855	195	195	1	4e-59	56.29	562	ANS58331.1
apical membrane antigen [Plasmodium inui]	Plasmodium inui	NA	52288	195	195	1	4e-59	56.29	562	AKQ33092.1
apical membrane protein-1 [Plasmodium vivax]	Plasmodium v...	malaria para...	5855	195	195	1	4e-59	56.29	562	ACY68742.1
apical membrane antigen 1 [Plasmodium vivax]	Plasmodium v...	malaria para...	5855	195	195	1	4e-59	56.95	562	AKC42189.1
apical membrane protein-1 [Plasmodium vivax]	Plasmodium v...	malaria para...	5855	195	195	1	4e-59	56.29	562	ACY68767.1
apical membrane protein-1 [Plasmodium vivax]	Plasmodium v...	malaria para...	5855	195	195	1	4e-59	56.29	562	ACY68880.1
apical membrane protein-1 [Plasmodium vivax]	Plasmodium v...	malaria para...	5855	195	195	1	4e-59	56.29	562	ACY68872.1
apical membrane protein-1 [Plasmodium vivax]	Plasmodium v...	malaria para...	5855	195	195	1	4e-59	56.29	562	ACY68834.1
apical membrane protein-1 [Plasmodium vivax]	Plasmodium v...	malaria para...	5855	195	195	1	4e-59	56.29	562	ACY68825.1
apical membrane protein-1 [Plasmodium vivax]	Plasmodium v...	malaria para...	5855	195	195	1	4e-59	56.29	562	ACY68775.1
apical membrane antigen-1 [Plasmodium vivax]	Plasmodium v...	malaria para...	5855	195	195	1	4e-59	56.29	562	UFQ05870.1
apical membrane protein-1 [Plasmodium vivax]	Plasmodium v...	malaria para...	5855	195	195	1	4e-59	56.29	562	ACY68752.1
apical membrane antigen-1 [Plasmodium vivax]	Plasmodium v...	malaria para...	5855	193	193	1	4e-59	55.63	501	ABN11184.1
merozoite receptor PK66 [Plasmodium vivax Mauritania I]	Plasmodium v...	NA	1035515	195	195	1	4e-59	56.29	562	KMZ93134.1
apical membrane antigen-1 [Plasmodium vivax]	Plasmodium v...	malaria para...	5855	195	195	1	4e-59	57.62	562	UFQ05863.1
apical membrane antigen 1 [Plasmodium vivax]	Plasmodium v...	malaria para...	5855	195	195	1	5e-59	56.95	562	AKC42172.1
apical membrane antigen 1 [Plasmodium vivax]	Plasmodium v...	malaria para...	5855	195	195	1	5e-59	56.29	562	AZL41040.1
apical membrane antigen-1 [Plasmodium vivax]	Plasmodium v...	malaria para...	5855	195	195	1	5e-59	56.29	562	UFQ05851.1
apical membrane protein-1 [Plasmodium vivax]	Plasmodium v...	malaria para...	5855	195	195	1	5e-59	56.29	562	ACY68755.1
apical membrane antigen 1 [Plasmodium vivax]	Plasmodium v...	malaria para...	5855	193	193	1	5e-59	55.63	508	AGS40940.1
apical membrane antigen-1 [Plasmodium vivax]	Plasmodium v...	malaria para...	5855	195	195	1	5e-59	56.29	562	UFQ05796.1
apical merozoite protein 1 [Plasmodium vivax]	Plasmodium v...	malaria para...	5855	194	194	1	5e-59	56.29	562	ACB42435.1
apical membrane antigen-1 [Plasmodium vivax]	Plasmodium v...	malaria para...	5855	194	194	1	5e-59	56.29	562	UFQ05803.1
apical membrane antigen 1 [Plasmodium vivax]	Plasmodium v...	malaria para...	5855	193	193	1	5e-59	55.63	508	AGS41014.1
apical membrane antigen-1 [Plasmodium vivax]	Plasmodium v...	malaria para...	5855	194	194	1	5e-59	56.29	562	UFQ05815.1
apical membrane antigen-1 [Plasmodium vivax]	Plasmodium v...	malaria para...	5855	194	194	1	5e-59	56.29	562	UFQ05799.1
apical membrane antigen-1 [Plasmodium vivax]	Plasmodium v...	malaria para...	5855	194	194	1	5e-59	56.29	562	UFQ05858.1
apical membrane protein-1 [Plasmodium vivax]	Plasmodium v...	malaria para...	5855	194	194	1	5e-59	56.29	562	ACY68747.1
apical membrane protein-1 [Plasmodium vivax]	Plasmodium v...	malaria para...	5855	194	194	1	5e-59	56.29	562	ACY68765.1
apical membrane antigen-1 [Plasmodium vivax]	Plasmodium v...	malaria para...	5855	194	194	1	6e-59	56.29	562	UFQ05802.1
apical membrane antigen-1 [Plasmodium vivax]	Plasmodium v...	malaria para...	5855	193	193	1	6e-59	56.29	501	ABN11203.1
apical membrane antigen-1 [Plasmodium vivax]	Plasmodium v...	malaria para...	5855	194	194	1	6e-59	56.29	562	UFQ05869.1
apical membrane antigen-1 [Plasmodium vivax]	Plasmodium v...	malaria para...	5855	194	194	1	6e-59	56.29	562	UFQ05807.1
apical membrane antigen-1 [Plasmodium vivax]	Plasmodium v...	malaria para...	5855	194	194	1	6e-59	56.29	562	UFQ05816.1
apical membrane protein-1 [Plasmodium vivax]	Plasmodium v...	malaria para...	5855	194	194	1	6e-59	56.29	562	ACY68772.1
apical membrane protein-1 [Plasmodium vivax]	Plasmodium v...	malaria para...	5855	194	194	1	6e-59	56.29	562	ACY68757.1
apical membrane antigen-1 [Plasmodium vivax]	Plasmodium v...	malaria para...	5855	194	194	1	8e-59	56.29	562	UFQ05817.1
apical membrane protein-1 [Plasmodium vivax]	Plasmodium v...	malaria para...	5855	194	194	1	9e-59	56.29	562	ACY68841.1
apical membrane protein-1 [Plasmodium vivax]	Plasmodium v...	malaria para...	5855	194	194	1	9e-59	56.29	562	ACY68731.1
apical membrane antigen-1 [Plasmodium vivax]	Plasmodium v...	malaria para...	5855	194	194	1	9e-59	56.29	562	ANS58320.1
apical membrane antigen-1 [Plasmodium vivax]	Plasmodium v...	malaria para...	5855	194	194	1	1e-58	56.29	562	UFQ05838.1
apical membrane protein-1 [Plasmodium vivax]	Plasmodium v...	malaria para...	5855	194	194	1	1e-58	55.63	562	ACY68728.1
apical membrane protein-1 [Plasmodium vivax]	Plasmodium v...	malaria para...	5855	194	194	1	1e-58	56.29	562	ACY68807.1
apical membrane antigen-1 [Plasmodium vivax]	Plasmodium v...	malaria para...	5855	194	194	1	1e-58	56.29	562	UFQ05818.1
apical membrane protein-1 [Plasmodium vivax]	Plasmodium v...	malaria para...	5855	194	194	1	1e-58	56.29	562	ACY68732.1
apical membrane protein-1 [Plasmodium vivax]	Plasmodium v...	malaria para...	5855	194	194	1	1e-58	56.29	562	ACY68756.1
apical membrane antigen-1 [Plasmodium vivax]	Plasmodium v...	malaria para...	5855	194	194	1	1e-58	56.29	562	UFQ05813.1
apical membrane antigen-1 [Plasmodium vivax]	Plasmodium v...	malaria para...	5855	194	194	1	1e-58	56.29	562	UFQ05866.1
apical membrane antigen-1 [Plasmodium knowlesi]	Plasmodium k...	NA	5850	194	194	1	1e-58	54.97	555	AIR08570.1
apical membrane protein-1 [Plasmodium vivax]	Plasmodium v...	malaria para...	5855	194	194	1	1e-58	56.29	562	ACY68793.1
apical membrane protein-1 [Plasmodium vivax]	Plasmodium v...	malaria para...	5855	194	194	1	1e-58	56.29	562	ACY68766.1
apical membrane antigen-1 [Plasmodium knowlesi]	Plasmodium k...	NA	5850	193	193	1	1e-58	54.97	555	AIR08569.1
apical membrane antigen-1 [Plasmodium knowlesi]	Plasmodium k...	NA	5850	193	193	1	1e-58	54.97	555	AIR08574.1
apical membrane antigen 1 [Plasmodium vivax]	Plasmodium v...	malaria para...	5855	194	194	1	1e-58	56.95	562	AKC42187.1
apical membrane antigen 1 [Plasmodium vivax]	Plasmodium v...	malaria para...	5855	194	194	1	1e-58	56.95	562	AKC42211.1
apical membrane antigen-1 [Plasmodium knowlesi]	Plasmodium k...	NA	5850	193	193	1	1e-58	54.97	555	AIR08578.1
apical membrane antigen-1 [Plasmodium knowlesi]	Plasmodium k...	NA	5850	193	193	1	1e-58	54.97	555	AIR08567.1
apical membrane antigen-1 [Plasmodium knowlesi]	Plasmodium k...	NA	5850	194	194	1	1e-58	54.97	563	UEP13448.1
apical membrane antigen-1 [Plasmodium knowlesi]	Plasmodium k...	NA	5850	194	194	1	1e-58	54.97	563	UEP13468.1
apical membrane antigen-1 [Plasmodium knowlesi]	Plasmodium k...	NA	5850	193	193	1	1e-58	54.97	555	AIR08587.1
apical membrane antigen-1 [Plasmodium knowlesi]	Plasmodium k...	NA	5850	193	193	1	1e-58	54.97	555	AIR08575.1
apical membrane antigen 1 [Plasmodium knowlesi]	Plasmodium k...	NA	5850	193	193	1	1e-58	54.97	563	UFI37832.1
apical membrane protein-1 [Plasmodium vivax]	Plasmodium v...	malaria para...	5855	193	193	1	1e-58	55.63	562	ACY68935.1
apical membrane antigen-1 [Plasmodium knowlesi]	Plasmodium k...	NA	5850	193	193	1	1e-58	54.97	563	UEP13438.1
apical membrane antigen-1 [Plasmodium knowlesi]	Plasmodium k...	NA	5850	193	193	1	1e-58	54.97	563	UEP13452.1
apical membrane antigen-1 [Plasmodium knowlesi]	Plasmodium k...	NA	5850	193	193	1	1e-58	54.97	555	AIR08577.1
apical membrane antigen-1 [Plasmodium knowlesi]	Plasmodium k...	NA	5850	193	193	1	1e-58	54.97	555	AIR08584.1
apical membrane antigen-1 [Plasmodium vivax]	Plasmodium v...	malaria para...	5855	193	193	1	1e-58	55.63	562	UFQ05826.1
apical membrane protein-1 [Plasmodium vivax]	Plasmodium v...	malaria para...	5855	193	193	1	1e-58	55.63	562	ACY68828.1
apical membrane antigen-1 [Plasmodium vivax]	Plasmodium v...	malaria para...	5855	193	193	1	1e-58	55.63	562	UFQ05798.1
apical membrane antigen-1 [Plasmodium knowlesi]	Plasmodium k...	NA	5850	193	193	1	1e-58	54.97	555	AIR08580.1
apical membrane antigen 1 [Plasmodium knowlesi]	Plasmodium k...	NA	5850	193	193	1	1e-58	54.97	563	AKD95275.1
apical membrane antigen-1 [Plasmodium knowlesi]	Plasmodium k...	NA	5850	193	193	1	1e-58	54.97	555	AIR08568.1
apical membrane antigen 1 [Plasmodium knowlesi]	Plasmodium k...	NA	5850	193	193	1	1e-58	54.97	563	AKD95272.1
apical membrane antigen 1 [Plasmodium knowlesi]	Plasmodium k...	NA	5850	193	193	1	1e-58	54.97	563	AKD95310.1
apical membrane antigen-1 [Plasmodium knowlesi]	Plasmodium k...	NA	5850	193	193	1	1e-58	54.97	563	UEP13417.1
apical membrane antigen 1 [Plasmodium knowlesi]	Plasmodium k...	NA	5850	193	193	1	1e-58	54.97	563	UFI37848.1
apical membrane antigen 1 [Plasmodium knowlesi]	Plasmodium k...	NA	5850	193	193	1	1e-58	54.97	563	AKD95282.1
apical membrane antigen 1 [Plasmodium knowlesi]	Plasmodium k...	NA	5850	193	193	1	1e-58	54.97	563	UFI37837.1
apical membrane antigen 1 [Plasmodium knowlesi]	Plasmodium k...	NA	5850	193	193	1	1e-58	54.97	563	AKD95269.1
apical membrane protein-1 [Plasmodium vivax]	Plasmodium v...	malaria para...	5855	193	193	1	1e-58	56.29	562	ACY68784.1
apical membrane antigen 1 [Plasmodium knowlesi]	Plasmodium k...	NA	5850	193	193	1	1e-58	54.97	563	AKD95273.1
apical membrane antigen 1 [Plasmodium knowlesi]	Plasmodium k...	NA	5850	193	193	1	1e-58	54.97	563	AKD95302.1
apical membrane protein-1 [Plasmodium vivax]	Plasmodium v...	malaria para...	5855	193	193	1	1e-58	55.63	562	ACY68729.1
apical membrane protein-1 [Plasmodium vivax]	Plasmodium v...	malaria para...	5855	193	193	1	1e-58	55.63	562	ACY68854.1
apical membrane antigen 1 [Plasmodium knowlesi]	Plasmodium k...	NA	5850	193	193	1	2e-58	54.97	563	AKD95271.1
apical membrane antigen 1 [Plasmodium knowlesi]	Plasmodium k...	NA	5850	193	193	1	2e-58	54.97	563	AKD95284.1
apical membrane antigen 1 [Plasmodium knowlesi]	Plasmodium k...	NA	5850	193	193	1	2e-58	54.97	563	AKD95291.1
apical membrane antigen-1 [Plasmodium knowlesi]	Plasmodium k...	NA	5850	193	193	1	2e-58	54.97	555	AIR08583.1
apical membrane antigen 1 [Plasmodium knowlesi]	Plasmodium k...	NA	5850	193	193	1	2e-58	54.97	563	AKD95308.1
apical membrane antigen 1 [Plasmodium knowlesi]	Plasmodium k...	NA	5850	193	193	1	2e-58	54.97	563	AKD95309.1
apical membrane antigen-1 [Plasmodium knowlesi]	Plasmodium k...	NA	5850	193	193	1	2e-58	54.97	563	UEP13445.1
apical membrane antigen 1 [Plasmodium knowlesi]	Plasmodium k...	NA	5850	193	193	1	2e-58	54.97	563	AKD95289.1
apical membrane antigen 1 [Plasmodium knowlesi]	Plasmodium k...	NA	5850	193	193	1	2e-58	54.97	563	AKD95276.1
apical membrane antigen 1 [Plasmodium knowlesi]	Plasmodium k...	NA	5850	193	193	1	2e-58	54.97	563	AKD95295.1
apical membrane antigen 1 [Plasmodium knowlesi strain H]	Plasmodium k...	NA	5851	193	193	1	2e-58	54.97	563	XP_002259339.1
apical membrane antigen 1 [Plasmodium knowlesi]	Plasmodium k...	NA	5850	193	193	1	2e-58	54.97	563	AKD95301.1
apical membrane antigen 1 [Plasmodium knowlesi]	Plasmodium k...	NA	5850	193	193	1	2e-58	54.97	563	AKD95312.1
apical membrane antigen 1 [Plasmodium knowlesi]	Plasmodium k...	NA	5850	193	193	1	2e-58	54.97	563	AKD95281.1
apical membrane protein-1 [Plasmodium vivax]	Plasmodium v...	malaria para...	5855	193	193	1	2e-58	55.63	562	ACY68773.1
apical membrane protein-1 [Plasmodium vivax]	Plasmodium v...	malaria para...	5855	193	193	1	2e-58	55.63	562	ACY68886.1
apical membrane protein-1 [Plasmodium vivax]	Plasmodium v...	malaria para...	5855	193	193	1	2e-58	55.63	562	ACY68758.1
apical membrane antigen 1 [Plasmodium knowlesi]	Plasmodium k...	NA	5850	193	193	1	2e-58	54.97	563	AKD95274.1
apical membrane antigen 1 [Plasmodium knowlesi]	Plasmodium k...	NA	5850	193	193	1	2e-58	54.97	563	UFI37841.1
apical membrane antigen [Plasmodium knowlesi]	Plasmodium k...	NA	5850	193	193	1	2e-58	54.97	563	AKQ33107.1
apical membrane antigen 1 [Plasmodium knowlesi]	Plasmodium k...	NA	5850	193	193	1	2e-58	54.97	563	AKD95270.1
apical membrane antigen 1 [Plasmodium knowlesi]	Plasmodium k...	NA	5850	193	193	1	2e-58	54.97	563	AKD95293.1
RecName: Full=Merozoite receptor PK66; AltName: Full=66 kDa...	Plasmodium k...	NA	5852	193	193	1	2e-58	54.97	563	P21303.2
apical membrane antigen 1 [Plasmodium knowlesi]	Plasmodium k...	NA	5850	193	193	1	2e-58	54.97	563	AKD95307.1
apical membrane antigen 1 [Plasmodium knowlesi]	Plasmodium k...	NA	5850	193	193	1	2e-58	54.97	563	UFI37839.1
apical membrane antigen-1 [Plasmodium knowlesi]	Plasmodium k...	NA	5850	193	193	1	2e-58	54.97	563	UEP13422.1
apical merozoite protein 1 [Plasmodium vivax]	Plasmodium v...	malaria para...	5855	193	193	1	2e-58	55.63	562	ACB42436.1
apical membrane antigen 1 [Plasmodium knowlesi]	Plasmodium k...	NA	5850	193	193	1	2e-58	54.97	563	UFI37834.1
apical membrane antigen-1 [Plasmodium vivax]	Plasmodium v...	malaria para...	5855	193	193	1	2e-58	55.63	562	UFQ05894.1
apical membrane antigen 1 [Plasmodium knowlesi]	Plasmodium k...	NA	5850	193	193	1	2e-58	54.97	563	UFI37843.1
apical membrane antigen-1 [Plasmodium knowlesi]	Plasmodium k...	NA	5850	193	193	1	2e-58	54.97	563	UEP13428.1
apical membrane antigen 1 [Plasmodium knowlesi]	Plasmodium k...	NA	5850	193	193	1	2e-58	54.97	563	UFI37830.1
apical membrane protein-1 [Plasmodium vivax]	Plasmodium v...	malaria para...	5855	193	193	1	2e-58	55.63	562	ACY68740.1
apical membrane antigen 1 [Plasmodium knowlesi]	Plasmodium k...	NA	5850	193	193	1	2e-58	54.97	563	UFI37844.1
apical membrane antigen 1 [Plasmodium vivax]	Plasmodium v...	malaria para...	5855	192	192	1	2e-58	55.63	540	ACB55378.1
apical membrane antigen [Plasmodium coatneyi]	Plasmodium c...	NA	208452	193	193	1	2e-58	55.63	562	AKQ33110.1
apical membrane antigen [Plasmodium inui]	Plasmodium inui	NA	52288	193	193	1	2e-58	55.63	562	AKQ33099.1
apical membrane protein-1 [Plasmodium vivax]	Plasmodium v...	malaria para...	5855	192	192	1	3e-58	56.29	562	ACY68764.1
apical membrane antigen-1 [Plasmodium vivax]	Plasmodium v...	malaria para...	5855	192	192	1	3e-58	55.63	562	UFQ05831.1
apical membrane antigen 1 [Plasmodium knowlesi]	Plasmodium k...	NA	5850	192	192	1	4e-58	54.97	563	AKD95318.1
apical membrane antigen-1 [Plasmodium knowlesi]	Plasmodium k...	NA	5850	192	192	1	5e-58	54.3	555	AIR08594.1
apical membrane antigen 1 [Plasmodium knowlesi]	Plasmodium k...	NA	5850	192	192	1	5e-58	54.97	563	UFI37845.1
apical membrane antigen [Plasmodium vivax]	Plasmodium v...	malaria para...	5855	188	188	1	5e-58	55.63	405	AEK48998.1
apical membrane antigen [Plasmodium vivax]	Plasmodium v...	malaria para...	5855	189	189	1	5e-58	54.97	446	ADK66279.1
apical membrane antigen-1 [Plasmodium vivax]	Plasmodium v...	malaria para...	5855	192	192	1	6e-58	54.97	562	UFQ05830.1
apical membrane antigen-1 [Plasmodium knowlesi]	Plasmodium k...	NA	5850	191	191	1	7e-58	54.3	555	AIR08571.1
apical membrane antigen [Plasmodium sp.]	Plasmodium sp.	NA	31272	192	192	1	7e-58	54.97	563	AKQ33108.1
apical membrane antigen [Plasmodium inui]	Plasmodium inui	NA	52288	191	191	1	8e-58	55.63	562	AKQ33096.1
apical membrane antigen 1 [Plasmodium knowlesi]	Plasmodium k...	NA	5850	191	191	1	9e-58	54.3	563	UFI37846.1
apical membrane antigen 1 [Plasmodium knowlesi]	Plasmodium k...	NA	5850	191	191	1	9e-58	54.3	563	AKD95296.1
Apical membrane antigen [Plasmodium coatneyi]	Plasmodium c...	NA	208452	191	191	1	9e-58	55.63	562	XP_019914799.1
apical membrane antigen 1 [Plasmodium knowlesi]	Plasmodium k...	NA	5850	191	191	1	9e-58	54.3	563	AKD95305.1
apical membrane antigen-1 [Plasmodium knowlesi]	Plasmodium k...	NA	5850	191	191	1	9e-58	54.3	563	UEP13426.1
apical membrane antigen 1 [Plasmodium knowlesi]	Plasmodium k...	NA	5850	191	191	1	9e-58	54.3	563	UFI37849.1
apical membrane antigen-1 [Plasmodium knowlesi]	Plasmodium k...	NA	5850	191	191	1	9e-58	54.3	563	UEP13427.1
apical membrane antigen-1 [Plasmodium knowlesi]	Plasmodium k...	NA	5850	191	191	1	9e-58	54.3	563	UEP13431.1
apical membrane antigen-1 [Plasmodium knowlesi]	Plasmodium k...	NA	5850	191	191	1	9e-58	54.3	563	UEP13418.1
apical membrane antigen-1 [Plasmodium knowlesi]	Plasmodium k...	NA	5850	191	191	1	9e-58	54.3	563	UEP13425.1
apical membrane antigen 1 [Plasmodium knowlesi]	Plasmodium k...	NA	5850	191	191	1	9e-58	54.3	563	AKD95279.1
apical membrane antigen [Plasmodium sp.]	Plasmodium sp.	NA	31272	191	191	1	1e-57	54.3	563	AKQ33109.1
apical membrane antigen-1 [Plasmodium ovale curtisi]	Plasmodium o...	NA	864141	190	190	1	3e-57	53.64	563	QQD36770.1
apical membrane antigen 1 (AMA1) [Plasmodium ovale curtisi]	Plasmodium o...	NA	864141	190	190	1	3e-57	53.64	563	SBS83853.1
apical membrane antigen 1 [Plasmodium knowlesi]	Plasmodium k...	NA	5850	190	190	1	4e-57	54.3	563	UFI37842.1
apical membrane antigen 1 [Plasmodium vivax]	Plasmodium v...	malaria para...	5855	189	189	1	4e-57	54.97	562	AZL41035.1
apical membrane antigen 1 [Plasmodium knowlesi]	Plasmodium k...	NA	5850	189	189	1	5e-57	53.64	563	UFI37840.1
apical membrane antigen 1 [Plasmodium chabaudi adami]	Plasmodium c...	NA	5826	182	182	1	2e-56	53.64	340	AAB36511.1
apical membrane antigen-1 [Plasmodium ovale wallikeri]	Plasmodium o...	NA	864142	187	187	1	3e-56	52.32	563	QQD36771.1
apical membrane antigen 1 [Plasmodium chabaudi chabaudi]	Plasmodium c...	NA	31271	179	179	1	4e-55	52.32	327	AAB36510.1
apical membrane antigen 1, putative [Plasmodium chabaudi...	Plasmodium c...	NA	31271	184	184	1	6e-55	53.64	558	SCM22483.1
RecName: Full=Apical membrane antigen 1; AltName: Full=Merozoi...	Plasmodium c...	NA	5825	182	182	1	2e-54	53.64	558	P16445.1
apical membrane antigen 1, putative [Plasmodium chabaudi...	Plasmodium c...	NA	31271	179	179	1	5e-53	52.32	558	SCN60639.1
apical membrane antigen 1, putative [Plasmodium chabaudi...	Plasmodium c...	NA	31271	179	179	1	5e-53	52.32	558	XP_735887.2
apical membrane antigen 1, putative [Plasmodium gallinaceum]	Plasmodium g...	NA	5849	178	178	1	6e-53	52.98	556	XP_028529190.1
apical membrane antigen 1, putative [Plasmodium relictum]	Plasmodium r...	NA	85471	176	176	1	6e-52	54.25	556	XP_028533210.1
apical membrane antigen 1 [Plasmodium chabaudi adami]	Plasmodium c...	NA	5826	175	175	1	1e-51	50.99	558	AAB36509.1
apical membrane antigen-1 [Plasmodium berghei]	Plasmodium b...	NA	5821	174	174	1	2e-51	50.33	556	AAC47192.1
apical membrane antigen 1 [Plasmodium berghei ANKA]	Plasmodium b...	NA	5823	174	174	1	4e-51	50.33	556	XP_034421501.1
apical membrane antigen 1 [Plasmodium yoelii]	Plasmodium y...	NA	5861	172	172	1	2e-50	49.67	557	XP_729363.1
apical membrane antigen 1, putative [Plasmodium vinckei lentum]	Plasmodium v...	NA	138297	172	172	1	2e-50	50.99	558	CAD2092023.1
apical membrane antigen 1, putative [Plasmodium vinckei]	Plasmodium v...	NA	5860	171	171	1	5e-50	50.99	558	CAD2104582.1
apical membrane antigen-1 [Plasmodium yoelii]	Plasmodium y...	NA	5861	170	170	1	8e-50	49.01	557	AAC47193.1
apical membrane antigen 1 [Plasmodium vinckei petteri]	Plasmodium v...	NA	138298	170	170	1	1e-49	50.33	558	EUD72961.1
apical membrane antigen 1 [Plasmodium yoelii 17X]	Plasmodium y...	NA	1323249	169	169	1	4e-49	49.01	557	ETB57611.1
apical membrane antigen 1, putative [Plasmodium vinckei...	Plasmodium v...	NA	119398	168	168	1	7e-49	49.67	558	CAD2091954.1
apical membrane antigen 1, putative [Plasmodium vinckei vinckei]	Plasmodium v...	NA	54757	167	167	1	2e-48	49.67	558	XP_008624881.2
apical membrane antigen 1 [Plasmodium vinckei vinckei]	Plasmodium v...	NA	54757	166	166	1	5e-48	49.67	558	KEG02268.1
apical membrane antigen-1 [Plasmodium yoelii]	Plasmodium y...	NA	5861	166	166	1	5e-48	48.34	557	AAC47194.1

## Sheet: Sequence Alignment 
		Common polar interactions for both WD34:AMA1Pf and WD34:AMA1Pv complexes
		Polar interactions only found in WD34:AMA1Pf
		Polar interactions only found in WD34:AMA1Pv
		Parasite isolates with G172E mutation
		Parasite isolates with other mutations
				130	131	132	133	134	135	136	137	138	139	140	141	142	143	144	145	146	147	148	149	150	151	152	153	154	155	156	157	158	159	160	161	162	163	164	165	166	167	168	169	170	171	172	173	174	175
				D	L	G	E	D	A	E	V	A	G	T	Q	Y	R	L	P	S	G	K	C	P	V	F	G	K	G	I	I	I	E	N	S	N	T	T	F	L	T	P	V	A	T	G	N	Q	Y
					Sequences from Xtal structures				Common polar interactions						Sequences with mutations in main polar interactions with WD34
					Polar interactions found in PfAMA1:WD34 complex				Polar interactions found in PvAMA1:WD34 complex
				130	131	132	133	134	135	136	137	138	139	140	141	142	143	144	145	146	147	148	149	150	151	152	153	154	155	156	157	158	159	160	161	162	163	164	165	166	167	168	169	170	171	172	173	174	175
Number	Query	130		D	L	G	E	D	A	E	V	A	G	T	Q	Y	R	L	P	S	G	K	C	P	V	F	G	K	G	I	I	I	E	N	S	N	T	T	F	L	T	P	V	A	T	G	N	Q	Y
1	CAD35543.1	15		.	.	.	.	.	.	.	.	.	.	.	.	.	.	.	.	.	.	.	.	.	.	.	.	.	.	.	.	.	.	.	.	.	.	.	.	.	.	.	.	.	.	.	.	.	.
2	AMP83631.1	22		.	.	.	.	.	.	.	.	.	.	.	.	.	.	.	.	.	.	.	.	.	.	.	.	.	.	.	.	.	.	.	.	.	.	.	.	.	.	.	.	.	.	.	.	.	.
3	AAC47110.1	118		.	.	.	.	.	.	.	.	.	.	.	.	.	.	.	.	.	.	.	.	.	.	.	.	.	.	.	.	.	.	.	.	.	.	.	.	.	.	.	.	.	.	.	.	.	.
4	AHI17052.1	105		.	.	.	.	.	.	.	.	.	.	.	.	.	.	.	.	.	.	.	.	.	.	.	.	.	.	.	.	.	.	.	.	.	.	.	.	.	.	.	.	.	.	.	.	.	.
5	AFM28645.1	106		.	.	.	.	.	.	.	.	.	.	.	.	.	.	.	.	.	.	.	.	.	.	.	.	.	.	.	.	.	.	.	.	.	.	.	.	.	.	.	.	.	.	.	.	.	.
6	AFM28669.1	106		.	.	.	.	.	.	.	.	.	.	.	.	.	.	.	.	.	.	.	.	.	.	.	.	.	.	.	.	.	.	.	.	.	.	.	.	.	.	.	.	.	.	.	.	.	.
7	AFM28588.1	106		.	.	.	.	.	.	.	.	.	.	.	.	.	.	.	.	.	.	.	.	.	.	.	.	.	.	.	.	.	.	.	.	.	.	.	.	.	.	.	.	.	.	.	.	.	.
8	AFM28740.1	106		.	.	.	.	.	.	.	.	.	.	.	.	.	.	.	.	.	.	.	.	.	.	.	.	.	.	.	.	.	.	.	.	.	.	.	.	.	.	.	.	.	.	.	.	.	.
9	AHI16983.1	105		.	.	.	.	.	.	.	.	.	.	.	.	.	.	.	.	.	.	.	.	.	.	.	.	.	.	.	.	.	.	.	.	.	.	.	.	.	.	.	.	.	.	.	.	.	.
10	AFM28573.1	106		.	.	.	.	.	.	.	.	.	.	.	.	.	.	.	.	.	.	.	.	.	.	.	.	.	.	.	.	.	.	.	.	.	.	.	.	.	.	.	.	.	.	.	.	.	.
11	AFM28917.1	106		.	.	.	.	.	.	.	.	.	.	.	.	.	.	.	.	.	.	.	.	.	.	.	.	.	.	.	.	.	.	.	.	.	.	.	.	.	.	.	.	.	.	.	.	.	.
12	AFM28681.1	106		.	.	.	.	.	.	.	.	.	.	.	.	.	.	.	.	.	.	.	.	.	.	.	.	.	.	.	.	.	.	.	.	.	.	.	.	.	.	.	.	.	.	.	.	.	.
13	AFM28732.1	106		.	.	.	.	.	.	.	.	.	.	.	.	.	.	.	.	.	.	.	.	.	.	.	.	.	.	.	.	.	.	.	.	.	.	.	.	.	.	.	.	.	.	.	.	.	.
14	AFM28610.1	106		.	.	.	.	.	.	.	.	.	.	.	.	.	.	.	.	.	.	.	.	.	.	.	.	.	.	.	.	.	.	.	.	.	.	.	.	.	.	.	.	.	.	.	.	.	.
15	AFM28825.1	106		.	.	.	.	.	.	.	.	.	.	.	.	.	.	.	.	.	.	.	.	.	.	.	.	.	.	.	.	.	.	.	.	.	.	.	.	.	.	.	.	.	.	.	.	.	.
16	AFM28666.1	106		.	.	.	.	.	.	.	.	.	.	.	.	.	.	.	.	.	.	.	.	.	.	.	.	.	.	.	.	.	.	.	.	.	.	.	.	.	.	.	.	.	.	.	.	.	.
17	AFM28531.1	106		.	.	.	.	.	.	.	.	.	.	.	.	.	.	.	.	.	.	.	.	.	.	.	.	.	.	.	.	.	.	.	.	.	.	.	.	.	.	.	.	.	.	.	.	.	.
18	AFM28661.1	106		.	.	.	.	.	.	.	.	.	.	.	.	.	.	.	.	.	.	.	.	.	.	.	.	.	.	.	.	.	.	.	.	.	.	.	.	.	.	.	.	.	.	.	.	.	.
19	AFM28912.1	106		.	.	.	.	.	.	.	.	.	.	.	.	.	.	.	.	.	.	.	.	.	.	.	.	.	.	.	.	.	.	.	.	.	.	.	.	.	.	.	.	.	.	.	.	.	.
20	CAB97202.1	122		.	.	.	.	.	.	.	.	.	.	.	.	.	.	.	.	.	.	.	.	.	.	.	.	.	.	.	.	.	.	.	.	.	.	.	.	.	.	.	.	.	.	.	.	.	.
21	CAD35523.1	15		.	.	.	.	.	.	.	.	.	.	.	.	.	.	.	.	.	.	.	.	.	.	.	.	.	.	.	.	.	.	.	.	.	.	.	.	.	.	.	.	.	.	E	.	.	D
22	AFM28965.1	106		.	.	.	.	.	.	.	.	.	.	.	.	.	.	.	.	.	.	.	.	.	.	.	.	.	.	.	.	.	.	.	.	.	.	.	.	.	.	.	.	.	.	.	.	.	.
23	AMP83642.1	22		.	.	.	.	.	.	.	.	.	.	.	.	.	.	.	.	.	.	.	.	.	.	.	.	.	.	.	.	.	.	.	.	.	.	.	.	.	.	.	.	.	.	E	.	.	D
24	AFM28547.1	106		.	.	.	.	.	.	.	.	.	.	.	.	.	.	.	.	.	.	.	.	.	.	.	.	.	.	.	.	.	.	.	.	.	.	.	.	.	.	.	.	.	.	.	.	.	.
25	AIR08603.1	94		.	.	.	.	.	.	.	.	.	.	.	.	.	.	.	.	.	.	.	.	.	.	.	.	.	.	.	.	.	.	.	.	.	.	.	.	.	.	.	.	.	.	.	.	.	.
26	AMX81242.1	66		.	.	.	.	.	.	.	.	.	.	.	.	.	.	.	.	.	.	.	.	.	.	.	.	.	.	.	.	.	.	.	.	.	.	.	.	.	.	.	.	.	.	E	.	.	D
27	AMX81240.1	66		.	.	.	.	.	.	.	.	.	.	.	.	.	.	.	.	.	.	.	.	.	.	.	.	.	.	.	.	.	.	.	.	.	.	.	.	.	.	.	.	.	.	E	.	.	D
28	AMP83758.1	22		.	.	.	.	.	.	.	.	.	.	.	.	.	.	.	.	.	.	.	.	.	.	.	.	.	.	.	.	.	.	.	.	.	.	.	.	.	.	.	.	.	.	E	.	.	D
29	AIR08604.1	94		.	.	.	.	.	.	.	.	.	.	.	.	.	.	.	.	.	.	.	.	.	.	.	.	.	.	.	.	.	.	.	.	.	.	.	.	.	.	.	.	.	.	.	.	.	.
30	CAD35554.1	15		.	.	.	.	.	.	.	.	.	.	.	.	.	.	.	.	.	.	.	.	.	.	.	.	.	.	.	.	.	.	.	.	K	.	.	.	.	.	.	.	.	.	E	.	.	D
31	ACA24148.1	120		.	.	.	.	.	.	.	.	.	.	.	.	.	.	.	.	.	.	.	.	.	.	.	.	.	.	.	.	.	.	.	.	.	.	.	.	.	.	.	.	.	.	.	.	.	.
32	ACR49699.1	117		.	.	.	.	.	.	.	.	.	.	.	.	.	.	.	.	.	.	.	.	.	.	.	.	.	.	.	.	.	.	.	.	.	.	.	.	.	.	.	.	.	.	.	.	.	.
33	ACR49673.1	117		.	.	.	.	.	.	.	.	.	.	.	.	.	.	.	.	.	.	.	.	.	.	.	.	.	.	.	.	.	.	.	.	.	.	.	.	.	.	.	.	.	.	.	.	.	.
34	ACR49754.1	117		.	.	.	.	.	.	.	.	.	.	.	.	.	.	.	.	.	.	.	.	.	.	.	.	.	.	.	.	.	.	.	.	.	.	.	.	.	.	.	.	.	.	.	.	.	.
35	ACR49683.1	117		.	.	.	.	.	.	.	.	.	.	.	.	.	.	.	.	.	.	.	.	.	.	.	.	.	.	.	.	.	.	.	.	.	.	.	.	.	.	.	.	.	.	.	.	.	.
36	ACR49680.1	117		.	.	.	.	.	.	.	.	.	.	.	.	.	.	.	.	.	.	.	.	.	.	.	.	.	.	.	.	.	.	.	.	.	.	.	.	.	.	.	.	.	.	.	.	.	.
37	AFM28960.1	106		.	.	.	.	.	.	.	.	.	.	.	.	.	.	.	.	.	.	.	.	.	.	.	.	.	.	.	.	.	.	.	.	.	.	.	.	.	.	.	.	.	.	.	.	.	.
38	ADM31345.1	2		.	.	.	.	.	.	.	.	.	.	.	.	.	.	.	.	.	.	.	.	.	.	.	.	.	.	.	.	.	.	.	.	.	.	.	.	.	.	.	.	.	.	E	.	.	D
39	ACR49684.1	117		.	.	.	.	.	.	.	.	.	.	.	.	.	.	.	.	.	.	.	.	.	.	.	.	.	.	.	.	.	.	.	.	.	.	.	.	.	.	.	.	.	.	.	.	.	.
40	ACR49728.1	117		.	.	.	.	.	.	.	.	.	.	.	.	.	.	.	.	.	.	.	.	.	.	.	.	.	.	.	.	.	.	.	.	.	.	.	.	.	.	.	.	.	.	.	.	.	.
41	CAD35539.1	15		.	.	.	.	.	.	.	.	.	.	.	.	.	.	.	.	.	.	.	.	.	.	.	.	.	.	.	.	.	.	.	.	.	.	.	.	.	.	.	.	.	.	E	.	.	D
42	ACR49659.1	117		.	.	.	.	.	.	.	.	.	.	.	.	.	.	.	.	.	.	.	.	.	.	.	.	.	.	.	.	.	.	.	.	.	.	.	.	.	.	.	.	.	.	.	.	.	.
43	AFM28683.1	106		.	.	.	.	.	.	.	.	.	.	.	.	.	.	.	.	.	.	.	.	.	.	.	.	.	.	.	.	.	.	.	.	.	.	.	.	.	.	.	.	.	.	.	.	.	.
44	AXN69730.1	127		.	.	.	.	.	.	.	.	.	.	.	.	.	.	.	.	.	.	.	.	.	.	.	.	.	.	.	.	.	.	.	.	.	.	.	.	.	.	.	.	.	.	.	.	.	.
45	AAC47104.1	122		.	.	.	.	.	.	.	.	.	.	.	.	.	.	.	.	.	.	.	.	.	.	.	.	.	.	.	.	.	.	.	.	.	.	.	.	.	.	.	.	.	.	.	.	.	.
46	P22621.1	130		.	.	.	.	.	.	.	.	.	.	.	.	.	.	.	.	.	.	.	.	.	.	.	.	.	.	.	.	.	.	.	.	.	.	.	.	.	.	.	.	.	.	.	.	.	.
47	ACB87856.1	130		.	.	.	.	.	.	.	.	.	.	.	.	.	.	.	.	.	.	.	.	.	.	.	.	.	.	.	.	.	.	.	.	.	.	.	.	.	.	.	.	.	.	.	.	.	.
48	ACB87843.1	130		.	.	.	.	.	.	.	.	.	.	.	.	.	.	.	.	.	.	.	.	.	.	.	.	.	.	.	.	.	.	.	.	.	.	.	.	.	.	.	.	.	.	.	.	.	.
49	BAM85525.1	130		.	.	.	.	.	.	.	.	.	.	.	.	.	.	.	.	.	.	.	.	.	.	.	.	.	.	.	.	.	.	.	.	.	.	.	.	.	.	.	.	.	.	.	.	.	.
50	AAG50121.1	130		.	.	.	.	.	.	.	.	.	.	.	.	.	.	.	.	.	.	.	.	.	.	.	.	.	.	.	.	.	.	.	.	.	.	.	.	.	.	.	.	.	.	.	.	.	.
51	UIH11145.1	130		.	.	.	.	.	.	.	.	.	.	.	.	.	.	.	.	.	.	.	.	.	.	.	.	.	.	.	.	.	.	.	.	.	.	.	.	.	.	.	.	.	.	.	.	.	.
52	BAM85651.1	130		.	.	.	.	.	.	.	.	.	.	.	.	.	.	.	.	.	.	.	.	.	.	.	.	.	.	.	.	.	.	.	.	.	.	.	.	.	.	.	.	.	.	.	.	.	.
53	ACB87816.1	130		.	.	.	.	.	.	.	.	.	.	.	.	.	.	.	.	.	.	.	.	.	.	.	.	.	.	.	.	.	.	.	.	.	.	.	.	.	.	.	.	.	.	.	.	.	.
54	ACB87801.1	130		.	.	.	.	.	.	.	.	.	.	.	.	.	.	.	.	.	.	.	.	.	.	.	.	.	.	.	.	.	.	.	.	.	.	.	.	.	.	.	.	.	.	.	.	.	.
55	BAN59369.1	130		.	.	.	.	.	.	.	.	.	.	.	.	.	.	.	.	.	.	.	.	.	.	.	.	.	.	.	.	.	.	.	.	.	.	.	.	.	.	.	.	.	.	.	.	.	.
56	ACB87810.1	130		.	.	.	.	.	.	.	.	.	.	.	.	.	.	.	.	.	.	.	.	.	.	.	.	.	.	.	.	.	.	.	.	.	.	.	.	.	.	.	.	.	.	.	.	.	.
57	ACR49723.1	117		.	.	.	.	.	.	.	.	.	.	.	.	.	.	.	.	.	.	.	.	.	.	.	.	.	.	.	.	.	.	.	.	.	.	.	.	.	.	.	.	.	.	.	.	.	.
58	CAB97200.1	122		.	.	.	.	.	.	.	.	.	.	.	.	.	.	.	.	.	.	.	.	.	.	.	.	.	.	.	.	.	.	.	.	.	.	.	.	.	.	.	.	.	.	.	.	.	.
59	AMM75848.1	42		.	.	.	.	.	.	.	.	.	.	.	.	.	.	.	.	.	.	.	.	.	.	.	.	.	.	.	.	.	.	.	.	.	.	.	.	.	.	.	.	.	.	.	.	.	.
60	XP_001348015.1	130		.	.	.	.	.	.	.	.	.	.	.	.	.	.	.	.	.	.	.	.	.	.	.	.	.	.	.	.	.	.	.	.	.	.	.	.	.	.	.	.	.	.	.	.	.	.
61	ADM31361.1	2		.	.	.	.	.	.	.	.	.	.	.	.	.	.	.	.	.	.	.	.	.	.	.	.	.	.	.	.	.	.	.	.	.	.	.	.	.	.	.	.	.	.	E	.	.	D
62	ADM31357.1	2		.	.	.	.	.	.	.	.	.	.	.	.	.	.	.	.	.	.	.	.	.	.	.	.	.	.	.	.	.	.	.	.	.	.	.	.	.	.	.	.	.	.	E	.	.	D
63	ADM31358.1	2		.	.	.	.	.	.	.	.	.	.	.	.	.	.	.	.	.	.	.	.	.	.	.	.	.	.	.	.	.	.	.	.	.	.	.	.	.	.	.	.	.	.	E	.	.	D
64	ADX07102.1	5		.	.	.	.	.	.	.	.	.	.	.	.	.	.	.	.	.	.	.	.	.	.	.	.	.	.	.	.	.	.	.	.	.	.	.	.	.	.	.	.	.	.	E	.	.	D
65	AMM75844.1	40		.	.	.	.	.	.	.	.	.	.	.	.	.	.	.	.	.	.	.	.	.	.	.	.	.	.	.	.	.	.	.	.	.	.	.	.	.	.	.	.	.	.	E	.	.	D
66	AFM28987.1	106		.	.	.	.	.	.	.	.	.	.	.	.	.	.	.	.	.	.	.	.	.	.	.	.	.	.	.	.	.	.	.	.	.	.	.	.	.	.	.	.	.	.	.	.	.	D
67	AMM75872.1	98		.	.	.	.	.	.	.	.	.	.	.	.	.	.	.	.	.	.	.	.	.	.	.	.	.	.	.	.	.	.	.	.	.	.	.	.	.	.	.	.	.	.	E	.	.	.
68	ADX07099.1	5		.	.	.	.	.	.	.	.	.	.	.	.	.	.	.	.	.	.	.	.	.	.	.	.	.	.	.	.	.	.	.	.	.	.	.	.	.	.	.	.	.	.	.	.	.	D
69	AMM75850.1	41		.	.	.	.	.	.	.	.	.	.	.	.	.	.	.	.	.	.	.	.	.	.	.	.	.	.	.	.	.	.	.	.	.	.	.	.	.	.	.	.	.	.	E	.	.	D
70	AMX81238.1	66		.	.	.	.	.	.	.	.	.	.	.	.	.	.	.	.	.	.	.	.	.	.	.	.	.	.	.	.	.	.	.	.	.	.	.	.	.	.	.	.	.	.	.	.	.	D
71	AMX81243.1	66		.	.	.	.	.	.	.	.	.	.	.	.	.	.	.	.	.	.	.	.	.	.	.	.	.	.	.	.	.	.	.	.	.	.	.	.	.	.	.	.	.	.	.	.	.	D
72	AMP83610.1	22		.	.	.	.	.	.	.	.	.	.	.	.	.	.	.	.	.	.	.	.	.	.	.	.	.	.	.	.	.	.	.	.	.	.	.	.	.	.	.	.	.	.	E	.	.	D
73	BAM85366.1	130		.	.	.	.	.	.	.	.	.	.	.	.	.	.	.	.	.	.	.	.	.	.	.	.	.	.	.	.	.	.	.	.	.	.	.	.	.	.	.	.	.	.	E	.	.	.
74	ACA24168.1	120		.	.	.	.	.	.	.	.	.	.	.	.	.	.	.	.	.	.	.	.	.	.	.	.	.	.	.	.	.	.	.	.	.	.	.	.	.	.	.	.	.	.	.	.	.	D
75	CAB97181.1	122		.	.	.	.	.	.	.	.	.	.	.	.	.	.	.	.	.	.	.	.	.	.	.	.	.	.	.	.	.	.	.	.	K	.	.	.	.	.	.	.	.	.	E	.	.	.
76	AFM28736.1	106		.	.	.	.	.	.	.	.	.	.	.	.	.	.	.	.	.	.	.	.	.	.	.	.	.	.	.	.	.	.	.	.	.	.	.	.	.	.	.	.	.	.	.	.	.	.
77	ADM31355.1	7		.	.	.	.	.	.	.	.	.	.	.	.	.	.	.	.	.	.	.	.	.	.	.	.	.	.	.	.	.	.	.	.	.	.	.	.	.	.	.	.	.	.	E	.	.	D
78	AAG50122.1	130		.	.	.	.	.	.	.	.	.	.	.	.	.	.	.	.	.	.	.	.	.	.	.	.	.	.	.	.	.	.	.	.	.	.	.	.	.	.	.	.	.	.	.	.	.	.
79	CAD35565.1	15		.	.	.	.	.	.	.	.	.	.	.	.	.	.	.	.	.	.	.	.	.	.	.	.	.	.	.	.	.	.	.	.	.	.	.	.	.	.	.	.	.	.	E	.	.	D
80	ADM31341.1	7		.	.	.	.	.	.	.	.	.	.	.	.	.	.	.	.	.	.	.	.	.	.	.	.	.	.	.	.	.	.	.	.	.	.	.	.	.	.	.	.	.	.	E	.	.	N
81	AMP83781.1	22		.	.	.	.	.	.	.	.	.	.	.	.	.	.	.	.	.	.	.	.	.	.	.	.	.	.	.	.	.	.	.	.	.	.	.	.	.	.	.	.	.	.	E	.	.	D
82	AHI17042.1	105		.	.	.	.	.	.	.	.	.	.	.	.	.	.	.	.	.	.	.	.	.	.	.	.	.	.	.	.	.	.	.	.	.	.	.	.	.	.	.	.	.	.	E	.	.	.
83	ACR49655.1	117		.	.	.	.	.	.	.	.	.	.	.	.	.	.	.	.	.	.	.	.	.	.	.	.	.	.	.	.	.	.	.	.	K	.	.	.	.	.	.	.	.	.	E	.	.	.
84	ADM31340.1	2		.	.	.	.	.	.	.	.	.	.	.	.	.	.	.	.	.	.	.	.	.	.	.	.	.	.	.	.	.	.	.	.	.	.	.	.	.	.	.	.	.	.	.	.	.	D
85	ADM31348.1	5		.	.	.	.	.	.	.	.	.	.	.	.	.	.	.	.	.	.	.	.	.	.	.	.	.	.	.	.	.	.	.	.	.	.	.	.	.	.	.	.	.	.	.	.	.	D
86	AAZ99888.1	34		.	.	.	.	.	.	.	.	.	.	.	.	.	.	.	.	.	.	.	.	.	.	.	.	.	.	.	.	.	.	.	.	K	.	.	.	.	.	.	.	.	.	E	.	.	D
87	AMM75857.1	42		.	.	.	.	.	.	.	.	.	.	.	.	.	.	.	.	.	.	.	.	.	.	.	.	.	.	.	.	.	.	.	.	.	.	.	.	.	.	.	.	.	.	E	.	.	D
88	AMP83636.1	22		.	.	.	.	.	.	.	.	.	.	.	.	.	.	.	.	.	.	.	.	.	.	.	.	.	.	.	.	.	.	.	.	.	.	.	.	.	.	.	.	.	.	.	.	.	.
89	AFM28579.1	106		.	.	.	.	.	.	.	.	.	.	.	.	.	.	.	.	.	.	.	.	.	.	.	.	.	.	.	.	.	.	.	.	.	.	.	.	.	.	.	.	.	.	E	.	.	D
90	AMP83615.1	22		.	.	.	.	.	.	.	.	.	.	.	.	.	.	.	.	.	.	.	.	.	.	.	.	.	.	.	.	.	.	.	.	.	.	.	.	.	.	.	.	.	.	E	.	.	D
91	AFM28551.1	106		.	.	.	.	.	.	.	.	.	.	.	.	.	.	.	.	.	.	.	.	.	.	.	.	.	.	.	.	.	.	.	.	.	.	.	.	.	.	.	.	.	.	E	.	.	D
92	AXN69729.1	127		.	.	.	.	.	.	.	.	.	.	.	.	.	.	.	.	.	.	.	.	.	.	.	.	.	.	.	.	.	.	.	.	.	.	.	.	.	.	.	.	.	.	.	.	.	.
93	AFM28663.1	106		.	.	.	.	.	.	.	.	.	.	.	.	.	.	.	.	.	.	.	.	.	.	.	.	.	.	.	.	.	.	.	.	.	.	.	.	.	.	.	.	.	.	E	.	.	D
94	AFM28924.1	106		.	.	.	.	.	.	.	.	.	.	.	.	.	.	.	.	.	.	.	.	.	.	.	.	.	.	.	.	.	.	.	.	.	.	.	.	.	.	.	.	.	.	E	.	.	D
95	AFM28597.1	106		.	.	.	.	.	.	.	.	.	.	.	.	.	.	.	.	.	.	.	.	.	.	.	.	.	.	.	.	.	.	.	.	.	.	.	.	.	.	.	.	.	.	E	.	.	D
96	ADM31354.1	3		.	.	.	.	.	.	.	.	.	.	.	.	.	.	.	.	.	.	.	.	.	.	.	.	.	.	.	.	.	.	.	.	.	.	.	.	.	.	.	.	.	.	E	.	.	D
97	AAG50119.1	130		.	.	.	.	.	.	.	.	.	.	.	.	.	.	.	.	.	.	.	.	.	.	.	.	.	.	.	.	.	.	.	.	.	.	.	.	.	.	.	.	.	.	.	.	.	.
98	ADX07106.1	1		.	.	.	.	.	.	.	.	.	.	.	.	.	.	.	.	.	.	.	.	.	.	.	.	.	.	.	.	.	.	.	.	K	.	.	.	.	.	.	.	.	.	E	.	.	D
99	AAG50120.1	130		.	.	.	.	.	.	.	.	.	.	.	.	.	.	.	.	.	.	.	.	.	.	.	.	.	.	.	.	.	.	.	.	.	.	.	.	.	.	.	.	.	.	.	.	.	.
100	BCL11775.1	130		.	.	.	.	.	.	.	.	.	.	.	.	.	.	.	.	.	.	.	.	.	.	.	.	.	.	.	.	.	.	.	.	.	.	.	.	.	.	.	.	.	.	.	.	.	.
101	BAM85398.1	130		.	.	.	.	.	.	.	.	.	.	.	.	.	.	.	.	.	.	.	.	.	.	.	.	.	.	.	.	.	.	.	.	.	.	.	.	.	.	.	.	.	.	E	.	.	D
102	BAV14284.1	130		.	.	.	.	.	.	.	.	.	.	.	.	.	.	.	.	.	.	.	.	.	.	.	.	.	.	.	.	.	.	.	.	.	.	.	.	.	.	.	.	.	.	.	.	.	.
103	CAD35558.1	15		.	.	.	.	.	.	.	.	.	.	.	.	.	.	.	.	.	.	.	.	.	.	.	.	.	.	.	.	.	.	.	.	.	.	.	.	.	.	.	.	.	.	.	.	.	D
104	BAV14265.1	130		.	.	.	.	.	.	.	.	.	.	.	.	.	.	.	.	.	.	.	.	.	.	.	.	.	.	.	.	.	.	.	.	.	.	.	.	.	.	.	.	.	.	.	.	.	.
105	AGL76297.1	75		.	.	.	.	.	.	.	.	.	.	.	.	.	.	.	.	.	.	.	.	.	.	.	.	.	.	.	.	.	.	.	.	.	.	.	.	.	.	.	.	.	.	E	.	.	D
106	CAD35519.1	15		.	.	.	.	.	.	.	.	.	.	.	.	.	.	.	.	.	.	.	.	.	.	.	.	.	.	.	.	.	.	.	.	.	.	.	.	.	.	.	.	.	.	E	K	.	D
107	ADM31363.1	2		.	.	.	.	.	.	.	.	.	.	.	.	.	.	.	.	.	.	.	.	.	.	.	.	.	.	.	.	.	.	.	.	K	.	.	.	.	.	.	.	.	.	E	.	.	D
108	AMM75865.1	97		.	.	.	.	.	.	.	.	.	.	.	.	.	.	.	.	.	.	.	.	.	.	.	.	.	.	.	.	.	.	.	.	.	.	.	.	.	.	.	.	.	.	.	.	.	.
109	AFM28900.1	106		.	.	.	.	.	.	.	.	.	.	.	.	.	.	.	.	.	.	.	.	.	.	.	.	.	.	.	.	.	.	.	.	.	.	.	.	.	.	.	.	.	.	E	.	.	D
110	AMM75875.1	100		.	.	.	.	.	.	.	.	.	.	.	.	.	.	.	.	.	.	.	.	.	.	.	.	.	.	.	.	.	.	.	.	.	.	.	.	.	.	.	.	.	.	.	.	.	.
111	AFM28916.1	106		.	.	.	.	.	.	.	.	.	.	.	.	.	.	.	.	.	.	.	.	.	.	.	.	.	.	.	.	.	.	.	.	.	.	.	.	.	.	.	.	.	.	E	.	.	D
112	AHI17058.1	105		.	.	.	.	.	.	.	.	.	.	.	.	.	.	.	.	.	.	.	.	.	.	.	.	.	.	.	.	.	.	.	.	.	.	.	.	.	.	.	.	.	.	E	.	.	D
113	AFM28708.1	106		.	.	.	.	.	.	.	.	.	.	.	.	.	.	.	.	.	.	.	.	.	.	.	.	.	.	.	.	.	.	.	.	.	.	.	.	.	.	.	.	.	.	E	.	.	D
114	ANS58300.1	130		.	.	.	.	.	.	.	.	.	.	.	.	.	.	.	.	.	.	.	.	.	.	.	.	.	.	.	.	.	.	.	.	K	.	.	.	.	.	.	.	.	.	.	.	.	D
115	CAD35553.1	15		.	.	.	.	.	.	.	.	.	.	.	.	.	.	.	.	.	.	.	.	.	.	.	.	.	.	.	.	.	.	.	.	.	.	.	.	.	.	.	.	.	.	E	.	.	D
116	AHI16999.1	105		.	.	.	.	.	.	.	.	.	.	.	.	.	.	.	.	.	.	.	.	.	.	.	.	.	.	.	.	.	.	.	.	.	.	.	.	.	.	.	.	.	.	E	.	.	D
117	BAV14290.1	130		.	.	.	.	.	.	.	.	.	.	.	.	.	.	.	.	.	.	.	.	.	.	.	.	.	.	.	.	.	.	.	.	.	.	.	.	.	.	.	.	.	.	.	.	.	.
118	AFM28532.1	106		.	.	.	.	.	.	.	.	.	.	.	.	.	.	.	.	.	.	.	.	.	.	.	.	.	.	.	.	.	.	.	.	K	.	.	.	.	.	.	.	.	.	E	.	.	D
119	AXN69728.1	127		.	.	.	.	.	.	.	.	.	.	.	.	.	.	.	.	.	.	.	.	.	.	.	.	.	.	.	.	.	.	.	.	.	.	.	.	.	.	.	.	.	.	E	.	.	D
120	BAM85489.1	130		.	.	.	.	.	.	.	.	.	.	.	.	.	.	.	.	.	.	.	.	.	.	.	.	.	.	.	.	.	.	.	.	.	.	.	.	.	.	.	.	.	.	.	.	.	D
121	ACR49763.1	117		.	.	.	.	.	.	.	.	.	.	.	.	.	.	.	.	.	.	.	.	.	.	.	.	.	.	.	.	.	.	.	.	K	.	.	.	.	.	.	.	.	.	E	.	.	D
122	ETW28666.1	130		.	.	.	.	.	.	.	.	.	.	.	.	.	.	.	.	.	.	.	.	.	.	.	.	.	.	.	.	.	.	.	.	.	.	.	.	.	.	.	.	.	.	E	.	.	D
123	CAB97197.1	122		.	.	.	.	.	.	.	.	.	.	.	.	.	.	.	.	.	.	.	.	.	.	.	.	.	.	.	.	.	.	.	.	K	.	.	.	.	.	.	.	.	.	E	.	.	D
124	ACB87817.1	130		.	.	.	.	.	.	.	.	.	.	.	.	.	.	.	.	.	.	.	.	.	.	.	.	.	.	.	.	.	.	.	.	.	.	.	.	.	.	.	.	.	.	E	.	.	D
125	ANS58281.1	130		.	.	.	.	.	.	.	.	.	.	.	.	.	.	.	.	.	.	.	.	.	.	.	.	.	.	.	.	.	.	.	.	.	.	.	.	.	.	.	.	.	.	E	.	.	D
126	AMM75871.1	98		.	.	.	.	.	.	.	.	.	.	.	.	.	.	.	.	.	.	.	.	.	.	.	.	.	.	.	.	.	.	.	.	.	.	.	.	.	.	.	.	.	.	E	.	.	D
127	ACB87805.1	130		.	.	.	.	.	.	.	.	.	.	.	.	.	.	.	.	.	.	.	.	.	.	.	.	.	.	.	.	.	.	.	.	.	.	.	.	.	.	.	.	.	.	E	.	.	D
128	ADX07098.1	5		.	.	.	.	.	.	.	.	.	.	.	.	.	.	.	.	.	.	.	.	.	.	.	.	.	.	.	.	.	.	.	.	K	.	.	.	.	.	.	.	.	.	E	.	.	D
129	ANS58291.1	130		.	.	.	.	.	.	.	.	.	.	.	.	.	.	.	.	.	.	.	.	.	.	.	.	.	.	.	.	.	.	.	.	.	.	.	.	.	.	.	.	.	.	E	.	.	D
130	BAM85430.1	130		.	.	.	.	.	.	.	.	.	.	.	.	.	.	.	.	.	.	.	.	.	.	.	.	.	.	.	.	.	.	.	.	.	.	.	.	.	.	.	.	.	.	E	.	.	D
131	AFM28650.1	106		.	.	.	.	.	.	.	.	.	.	.	.	.	.	.	.	.	.	.	.	.	.	.	.	.	.	.	.	.	.	.	.	K	.	.	.	.	.	.	.	.	.	E	.	.	D
132	AFM28914.1	106		.	.	.	.	.	.	.	.	.	.	.	.	.	.	.	.	.	.	.	.	.	.	.	.	.	.	.	.	.	.	.	.	K	.	.	.	.	.	.	.	.	.	E	.	.	D
133	ANS58296.1	130		.	.	.	.	.	.	.	.	.	.	.	.	.	.	.	.	.	.	.	.	.	.	.	.	.	.	.	.	.	.	.	.	.	.	.	.	.	.	.	.	.	.	E	.	.	D
134	AFM28822.1	106		.	.	.	.	.	.	.	.	.	.	.	.	.	.	.	.	.	.	.	.	.	.	.	.	.	.	.	.	.	.	.	.	K	.	.	.	.	.	.	.	.	.	E	.	.	D
135	AHI17004.1	105		.	.	.	.	.	.	.	.	.	.	.	.	.	.	.	.	.	.	.	.	.	.	.	.	.	.	.	.	.	.	.	.	.	.	.	.	.	.	.	.	.	.	E	.	.	D
136	BAV14292.1	130		.	.	.	.	.	.	.	.	.	.	.	.	.	.	.	.	.	.	.	.	.	.	.	.	.	.	.	.	.	.	.	.	.	.	.	.	.	.	.	.	.	.	.	.	.	.
137	ACR49761.1	117		.	.	.	.	.	.	.	.	.	.	.	.	.	.	.	.	.	.	.	.	.	.	.	.	.	.	.	.	.	.	.	.	.	.	.	.	.	.	.	.	.	.	E	.	.	D
138	BCL11778.1	130		.	.	.	.	.	.	.	.	.	.	.	.	.	.	.	.	.	.	.	.	.	.	.	.	.	.	.	.	.	.	.	.	.	.	.	.	.	.	.	.	.	.	.	.	.	.
139	BAV14264.1	130		.	.	.	.	.	.	.	.	.	.	.	.	.	.	.	.	.	.	.	.	.	.	.	.	.	.	.	.	.	.	.	.	.	.	.	.	.	.	.	.	.	.	.	.	.	.
140	ADM31349.1	4		.	.	.	.	.	.	.	.	.	.	.	.	.	.	.	.	.	.	.	.	.	.	.	.	.	.	.	.	.	.	.	.	.	.	.	.	.	.	.	.	.	.	E	.	.	D
141	BAM85372.1	130		.	.	.	.	.	.	.	.	.	.	.	.	.	.	.	.	.	.	.	.	.	.	.	.	.	.	.	.	.	.	.	.	.	.	.	.	.	.	.	.	.	.	.	.	.	.
142	ADM31350.1	4		.	.	.	.	.	.	.	.	.	.	.	.	.	.	.	.	.	.	.	.	.	.	.	.	.	.	.	.	.	.	.	.	.	.	.	.	.	.	.	.	.	.	E	.	.	D
143	AXN69767.1	127		.	.	.	.	.	.	.	.	.	.	.	.	.	.	.	.	.	.	.	.	.	.	.	.	.	.	.	.	.	.	.	.	.	.	.	.	.	.	.	.	.	.	E	.	.	D
144	AMM75879.1	100		.	.	.	.	.	.	.	.	.	.	.	.	.	.	.	.	.	.	.	.	.	.	.	.	.	.	.	.	.	.	.	.	.	.	.	.	.	.	.	.	.	.	.	.	.	.
145	BCL11785.1	130		.	.	.	.	.	.	.	.	.	.	.	.	.	.	.	.	.	.	.	.	.	.	.	.	.	.	.	.	.	.	.	.	.	.	.	.	.	.	.	.	.	.	E	.	.	D
146	ACA24153.1	120		.	.	.	.	.	.	.	.	.	.	.	.	.	.	.	.	.	.	.	.	.	.	.	.	.	.	.	.	.	.	.	.	.	.	.	.	.	.	.	.	.	.	.	.	.	.
147	AMM75888.1	96		.	.	.	.	.	.	.	.	.	.	.	.	.	.	.	.	.	.	.	.	.	.	.	.	.	.	.	.	.	.	.	.	.	.	.	.	.	.	.	.	.	.	.	.	.	.
148	AMM75855.1	46		.	.	.	.	.	.	.	.	.	.	.	.	.	.	.	.	.	.	.	.	.	.	.	.	.	.	.	.	.	.	.	.	K	.	.	.	.	.	.	.	.	.	E	.	.	D
149	ACB87847.1	130		.	.	.	.	.	.	.	.	.	.	.	.	.	.	.	.	.	.	.	.	.	.	.	.	.	.	.	.	.	.	.	.	.	.	.	.	.	.	.	.	.	.	E	.	.	D
150	BAM85538.1	130		.	.	.	.	.	.	.	.	.	.	.	.	.	.	.	.	.	.	.	.	.	.	.	.	.	.	.	.	.	.	.	.	.	.	.	.	.	.	.	.	.	.	E	.	.	D
151	ANS58278.1	130		.	.	.	.	.	.	.	.	.	.	.	.	.	.	.	.	.	.	.	.	.	.	.	.	.	.	.	.	.	.	.	.	.	.	.	.	.	.	.	.	.	.	E	.	.	D
152	AGL76293.1	75		.	.	.	.	.	.	.	.	.	.	.	.	.	.	.	.	.	.	.	.	.	.	.	.	.	.	.	.	.	.	.	.	.	.	.	.	.	.	.	.	.	.	.	.	.	D
153	BAM85704.1	130		.	.	.	.	.	.	.	.	.	.	.	.	.	.	.	.	.	.	.	.	.	.	.	.	.	.	.	.	.	.	.	.	.	.	.	.	.	.	.	.	.	.	E	.	.	D
154	AFM28892.1	106		.	.	.	.	.	.	.	.	.	.	.	.	.	.	.	.	.	.	.	.	.	.	.	.	.	.	.	.	.	.	.	.	K	.	.	.	.	.	.	.	.	.	E	.	.	D
155	ACB87776.1	130		.	.	.	.	.	.	.	.	.	.	.	.	.	.	.	.	.	.	.	.	.	.	.	.	.	.	.	.	.	.	.	.	.	.	.	.	.	.	.	.	.	.	E	.	.	D
156	ANS58263.1	130		.	.	.	.	.	.	.	.	.	.	.	.	.	.	.	.	.	.	.	.	.	.	.	.	.	.	.	.	.	.	.	.	.	.	.	.	.	.	.	.	.	.	E	.	.	D
157	AFM28571.1	106		.	.	.	.	.	.	.	.	.	.	.	.	.	.	.	.	.	.	.	.	.	.	.	.	.	.	.	.	.	.	.	.	.	.	.	.	.	.	.	.	.	.	E	.	.	D
158	BAM85463.1	130		.	.	.	.	.	.	.	.	.	.	.	.	.	.	.	.	.	.	.	.	.	.	.	.	.	.	.	.	.	.	.	.	.	.	.	.	.	.	.	.	.	.	E	.	.	D
159	AFM28755.1	106		.	.	.	.	.	.	.	.	.	.	.	.	.	.	.	.	.	.	.	.	.	.	.	.	.	.	.	.	.	.	.	.	K	.	.	.	.	.	.	.	.	.	E	.	.	D
160	BAM85539.1	130		.	.	.	.	.	.	.	.	.	.	.	.	.	.	.	.	.	.	.	.	.	.	.	.	.	.	.	.	.	.	.	.	.	.	.	.	.	.	.	.	.	.	E	.	.	D
161	AFM28871.1	106		.	.	.	.	.	.	.	.	.	.	.	.	.	.	.	.	.	.	.	.	.	.	.	.	.	.	.	.	.	.	.	.	K	.	.	.	.	.	.	.	.	.	E	.	.	D
162	ANS58269.1	130		.	.	.	.	.	.	.	.	.	.	.	.	.	.	.	.	.	.	.	.	.	.	.	.	.	.	.	.	.	.	.	.	.	.	.	.	.	.	.	.	.	.	E	.	.	D
163	AXN69748.1	127		.	.	.	.	.	.	.	.	.	.	.	.	.	.	.	.	.	.	.	.	.	.	.	.	.	.	.	.	.	.	.	.	K	.	.	.	.	.	.	.	.	.	E	.	.	D
164	AFM28530.1	106		.	.	.	.	.	.	.	.	.	.	.	.	.	.	.	.	.	.	.	.	.	.	.	.	.	.	.	.	.	.	.	.	K	.	.	.	.	.	.	.	.	.	E	.	.	D
165	BCL11761.1	130		.	.	.	.	.	.	.	.	.	.	.	.	.	.	.	.	.	.	.	.	.	.	.	.	.	.	.	.	.	.	.	.	.	.	.	.	.	.	.	.	.	.	E	.	.	D
166	BAV14260.1	130		.	.	.	.	.	.	.	.	.	.	.	.	.	.	.	.	.	.	.	.	.	.	.	.	.	.	.	.	.	.	.	.	.	.	.	.	.	.	.	.	.	.	E	.	.	D
167	ANS58264.1	130		.	.	.	.	.	.	.	.	.	.	.	.	.	.	.	.	.	.	.	.	.	.	.	.	.	.	.	.	.	.	.	.	.	.	.	.	.	.	.	.	.	.	E	.	.	D
168	ACB87786.1	130		.	.	.	.	.	.	.	.	.	.	.	.	.	.	.	.	.	.	.	.	.	.	.	.	.	.	.	.	.	.	.	.	.	.	.	.	.	.	.	.	.	.	E	.	.	D
169	BAM85401.1	130		.	.	.	.	.	.	.	.	.	.	.	.	.	.	.	.	.	.	.	.	.	.	.	.	.	.	.	.	.	.	.	.	.	.	.	.	.	.	.	.	.	.	E	.	.	D
170	AMX81241.1	66		.	.	.	.	.	.	.	.	.	.	.	.	.	.	.	.	.	.	.	.	.	.	.	.	.	.	.	.	.	.	.	.	.	.	.	.	.	.	.	.	.	.	.	.	.	D
171	ACB87787.1	130		.	.	.	.	.	.	.	.	.	.	.	.	.	.	.	.	.	.	.	.	.	.	.	.	.	.	.	.	.	.	.	.	.	.	.	.	.	.	.	.	.	.	E	.	.	D
172	AMP83736.1	22		.	.	.	.	.	.	.	.	.	.	.	.	.	.	.	.	.	.	.	.	.	.	.	.	.	.	.	.	.	.	.	.	.	.	.	.	.	.	.	.	.	.	E	.	.	D
173	ACR49702.1	117		.	.	.	.	.	.	.	.	.	.	.	.	.	.	.	.	.	.	.	.	.	.	.	.	.	.	.	.	.	.	.	.	K	.	.	.	.	.	.	.	.	.	E	.	.	D
174	AMP83771.1	22		.	.	.	.	.	.	.	.	.	.	.	.	.	.	.	.	.	.	.	.	.	.	.	.	.	.	.	.	.	.	.	.	.	.	.	.	.	.	.	.	.	.	E	.	.	D
175	ANS58317.1	130		.	.	.	.	.	.	.	.	.	.	.	.	.	.	.	.	.	.	.	.	.	.	.	.	.	.	.	.	.	.	.	.	K	.	.	.	.	.	.	.	.	.	E	.	.	D
176	ACB87880.1	130		.	.	.	.	.	.	.	.	.	.	.	.	.	.	.	.	.	.	.	.	.	.	.	.	.	.	.	.	.	.	.	.	K	.	.	.	.	.	.	.	.	.	E	.	.	D
177	CAB97190.2	122		.	.	.	.	.	.	.	.	.	.	.	.	.	.	.	.	.	.	.	.	.	.	.	.	.	.	.	.	.	.	.	.	.	.	.	.	.	.	.	.	.	.	.	.	.	.
178	BAM85518.1	130		.	.	.	.	.	.	.	.	.	.	.	.	.	.	.	.	.	.	.	.	.	.	.	.	.	.	.	.	.	.	.	.	K	.	.	.	.	.	.	.	.	.	E	.	.	D
179	ANS58316.1	130		.	.	.	.	.	.	.	.	.	.	.	.	.	.	.	.	.	.	.	.	.	.	.	.	.	.	.	.	.	.	.	.	K	.	.	.	.	.	.	.	.	.	E	.	.	D
180	CAD35504.1	15		.	.	.	.	.	.	.	.	.	.	.	.	.	.	.	.	.	.	.	.	.	.	.	.	.	.	.	.	.	.	.	.	.	.	.	.	.	.	.	.	.	.	E	K	.	D
181	AAG01325.1	130		.	.	.	.	.	.	.	.	.	.	.	.	.	.	.	.	.	.	.	.	.	.	.	.	.	.	.	.	.	.	.	.	K	.	.	.	.	.	.	.	.	.	E	.	.	D
182	SOS79370.1	130		.	.	.	.	.	.	.	.	.	.	.	.	.	.	.	.	.	.	.	.	.	.	.	.	.	.	.	.	.	.	.	.	.	.	.	.	.	.	.	.	.	.	.	.	.	D
183	ABV02560.1	97		.	.	.	.	.	.	.	.	.	.	.	.	.	.	.	.	.	.	.	.	.	.	.	.	.	.	.	.	.	.	.	.	.	.	.	.	.	.	.	.	.	.	.	.	.	D
184	AMP83945.1	22		.	.	.	.	.	.	.	.	.	.	.	.	.	.	.	.	.	.	.	.	.	.	.	.	.	.	.	.	.	.	.	.	.	.	.	.	.	K	.	.	.	.	.	.	.	D
185	ACB87818.1	130		.	.	.	.	.	.	.	.	.	.	.	.	.	.	.	.	.	.	.	.	.	.	.	.	.	.	.	.	.	.	.	.	K	.	.	.	.	.	.	.	.	.	E	.	.	D
186	AGL76292.1	75		.	.	.	.	.	.	.	.	.	.	.	.	.	.	.	.	.	.	.	.	.	.	.	.	.	.	.	.	.	.	.	.	.	.	.	.	.	.	.	.	.	.	.	.	.	D
187	ADM31343.1	2		.	.	.	.	.	.	.	.	.	.	.	.	.	.	.	.	.	.	.	.	.	.	.	.	.	.	.	.	.	.	.	.	.	.	.	.	.	.	.	.	.	.	E	.	.	D
188	AMX81236.1	66		.	.	.	.	.	.	.	.	.	.	.	.	.	.	.	.	.	.	.	.	.	.	.	.	.	.	.	.	.	.	.	.	.	.	.	.	.	.	.	.	.	.	.	.	.	D
189	AGL76291.1	75		.	.	.	.	.	.	.	.	.	.	.	.	.	.	.	.	.	.	.	.	.	.	.	.	.	.	.	.	.	.	.	.	.	.	.	.	.	.	.	.	.	.	.	.	.	D
190	AGL76290.1	75		.	.	.	.	.	.	.	.	.	.	.	.	.	.	.	.	.	.	.	.	.	.	.	.	.	.	.	.	.	.	.	.	.	.	.	.	.	.	.	.	.	.	.	.	.	D
191	BAM85598.1	130		.	.	.	.	.	.	.	.	.	.	.	.	.	.	.	.	.	.	.	.	.	.	.	.	.	.	.	.	.	.	.	.	.	.	.	.	.	.	.	.	.	.	E	.	.	D
192	ANS58273.1	130		.	.	.	.	.	.	.	.	.	.	.	.	.	.	.	.	.	.	.	.	.	.	.	.	.	.	.	.	.	.	.	.	.	.	.	.	.	.	.	.	.	.	E	.	.	D
193	AFM28679.1	106		.	.	.	.	.	.	.	.	.	.	.	.	.	.	.	.	.	.	.	.	.	.	.	.	.	.	.	.	.	.	.	.	.	.	.	.	.	.	.	.	.	.	E	.	.	D
194	AFM28596.1	106		.	.	.	.	.	.	.	.	.	.	.	.	.	.	.	.	.	.	.	.	.	.	.	.	.	.	.	.	.	.	.	.	.	.	.	.	.	.	.	.	.	.	E	.	.	D
195	AFM28944.1	106		.	.	.	.	.	.	.	.	.	.	.	.	.	.	.	.	.	.	.	.	.	.	.	.	.	.	.	.	.	.	.	.	.	.	.	.	.	.	.	.	.	.	E	.	.	D
196	AFM28576.1	106		.	.	.	.	.	.	.	.	.	.	.	.	.	.	.	.	.	.	.	.	.	.	.	.	.	.	.	.	.	.	.	.	.	.	.	.	.	.	.	.	.	.	E	.	.	D
197	BAM85680.1	130		.	.	.	.	.	.	.	.	.	.	.	.	.	.	.	.	.	.	.	.	.	.	.	.	.	.	.	.	.	.	.	.	.	.	.	.	.	.	.	.	.	.	E	.	.	D
198	AFM28951.1	106		.	.	.	.	.	.	.	.	.	.	.	.	.	.	.	.	.	.	.	.	.	.	.	.	.	.	.	.	.	.	.	.	.	.	.	.	.	.	.	.	.	.	E	.	.	D
199	AFM28834.1	106		.	.	.	.	.	.	.	.	.	.	.	.	.	.	.	.	.	.	.	.	.	.	.	.	.	.	.	.	.	.	.	.	.	.	.	.	.	.	.	.	.	.	E	.	.	D
200	AFM28835.1	106		.	.	.	.	.	.	.	.	.	.	.	.	.	.	.	.	.	.	.	.	.	.	.	.	.	.	.	.	.	.	.	.	.	.	.	.	.	.	.	.	.	.	E	.	.	D
201	AFM28797.1	106		.	.	.	.	.	.	.	.	.	.	.	.	.	.	.	.	.	.	.	.	.	.	.	.	.	.	.	.	.	.	.	.	.	.	.	.	.	.	.	.	.	.	E	.	.	D
202	AFM28660.1	106		.	.	.	.	.	.	.	.	.	.	.	.	.	.	.	.	.	.	.	.	.	.	.	.	.	.	.	.	.	.	.	.	.	.	.	.	.	.	.	.	.	.	E	.	.	D
203	AFM28590.1	106		.	.	.	.	.	.	.	.	.	.	.	.	.	.	.	.	.	.	.	.	.	.	.	.	.	.	.	.	.	.	.	.	.	.	.	.	.	.	.	.	.	.	E	.	.	D
204	AFM28923.1	106		.	.	.	.	.	.	.	.	.	.	.	.	.	.	.	.	.	.	.	.	.	.	.	.	.	.	.	.	.	.	.	.	.	.	.	.	.	.	.	.	.	.	E	.	.	D
205	BAV14256.1	130		.	.	.	.	.	.	.	.	.	.	.	.	.	.	.	.	.	.	.	.	.	.	.	.	.	.	.	.	.	.	.	.	.	.	.	.	.	.	.	.	.	.	.	.	.	.
206	AFM28864.1	106		.	.	.	.	.	.	.	.	.	.	.	.	.	.	.	.	.	.	.	.	.	.	.	.	.	.	.	.	.	.	.	.	.	.	.	.	.	.	.	.	.	.	E	.	.	D
207	AFM28604.1	106		.	.	.	.	.	.	.	.	.	.	.	.	.	.	.	.	.	.	.	.	.	.	.	.	.	.	.	.	.	.	.	.	.	.	.	.	.	.	.	.	.	.	E	.	.	D
208	ABV02565.1	97		.	.	.	.	.	.	.	.	.	.	.	.	.	.	.	.	.	.	.	.	.	.	.	.	.	.	.	.	.	.	.	.	.	.	.	.	.	.	.	.	.	.	.	.	.	D
209	ABV02570.1	97		.	.	.	.	.	.	.	.	.	.	.	.	.	.	.	.	.	.	.	.	.	.	.	.	.	.	.	.	.	.	.	.	.	.	.	.	.	.	.	.	.	.	.	.	.	D
210	CAB97193.1	122		.	.	.	.	.	.	.	.	.	.	.	.	.	.	.	.	.	.	.	.	.	.	.	.	.	.	.	.	.	.	.	.	.	.	.	.	.	.	.	.	.	.	E	.	.	D
211	BAM85409.1	130		.	.	.	.	.	.	.	.	.	.	.	.	.	.	.	.	.	.	.	.	.	.	.	.	.	.	.	.	.	.	.	.	.	.	.	.	.	.	.	.	.	.	.	.	.	.
212	AMM75887.1	100		.	.	.	.	.	.	.	.	.	.	.	.	.	.	.	.	.	.	.	.	.	.	.	.	.	.	.	.	.	.	.	.	.	.	.	.	.	.	.	.	.	.	.	.	.	.
213	ABV02563.1	97		.	.	.	.	.	.	.	.	.	.	.	.	.	.	.	.	.	.	.	.	.	.	.	.	.	.	.	.	.	.	.	.	.	.	.	.	.	.	.	.	.	.	.	.	.	D
214	BCL11735.1	130		.	.	.	.	.	.	.	.	.	.	.	.	.	.	.	.	.	.	.	.	.	.	.	.	.	.	.	.	.	.	.	.	.	.	.	.	.	.	.	.	.	.	.	.	.	.
215	AMP83621.1	22		.	.	.	.	.	.	.	.	.	.	.	.	.	.	.	.	.	.	.	.	.	.	.	.	.	.	.	.	.	.	.	.	.	.	.	.	.	.	.	.	.	.	E	K	.	D
216	ACB87841.1	130		.	.	.	.	.	.	.	.	.	.	.	.	.	.	.	.	.	.	.	.	.	.	.	.	.	.	.	.	.	.	.	.	.	.	.	.	.	.	.	.	.	.	E	.	.	D
217	BCL11742.1	130		.	.	.	.	.	.	.	.	.	.	.	.	.	.	.	.	.	.	.	.	.	.	.	.	.	.	.	.	.	.	.	.	.	.	.	.	.	.	.	.	.	.	E	.	.	D
218	BAM85410.1	130		.	.	.	.	.	.	.	.	.	.	.	.	.	.	.	.	.	.	.	.	.	.	.	.	.	.	.	.	.	.	.	.	.	.	.	.	.	.	.	.	.	.	E	.	.	D
219	BAV14279.1	130		.	.	.	.	.	.	.	.	.	.	.	.	.	.	.	.	.	.	.	.	.	.	.	.	.	.	.	.	.	.	.	.	.	.	.	.	.	.	.	.	.	.	E	.	.	D
220	BCL11763.1	130		.	.	.	.	.	.	.	.	.	.	.	.	.	.	.	.	.	.	.	.	.	.	.	.	.	.	.	.	.	.	.	.	.	.	.	.	.	.	.	.	.	.	E	.	.	D
221	AMP83793.1	22		.	.	.	.	.	.	.	.	.	.	.	.	.	.	.	.	.	.	.	.	.	.	.	.	.	.	.	.	.	.	.	.	.	.	.	.	.	.	.	.	.	.	E	.	.	D
222	ABV02569.1	97		.	.	.	.	.	.	.	.	.	.	.	.	.	.	.	.	.	.	.	.	.	.	.	.	.	.	.	.	.	.	.	.	.	.	.	.	.	.	.	.	.	.	.	.	.	D
223	AFM28826.1	106		.	.	.	.	.	.	.	.	.	.	.	.	.	.	.	.	.	.	.	.	.	.	.	.	.	.	.	.	.	.	.	.	.	.	.	.	.	.	.	.	.	.	E	.	.	D
224	BAM85414.1	130		.	.	.	.	.	.	.	.	.	.	.	.	.	.	.	.	.	.	.	.	.	.	.	.	.	.	.	.	.	.	.	.	.	.	.	.	.	.	.	.	.	.	E	.	.	D
225	ABV02567.1	97		.	.	.	.	.	.	.	.	.	.	.	.	.	.	.	.	.	.	.	.	.	.	.	.	.	.	.	.	.	.	.	.	.	.	.	.	.	.	.	.	.	.	.	.	.	D
226	AMP83715.1	22		.	.	.	.	.	.	.	.	.	.	.	.	.	.	.	.	.	.	.	.	.	.	.	.	.	.	.	.	.	.	.	.	K	.	.	.	.	.	.	.	.	.	E	.	.	D
227	BAV14283.1	130		.	.	.	.	.	.	.	.	.	.	.	.	.	.	.	.	.	.	.	.	.	.	.	.	.	.	.	.	.	.	.	.	K	.	.	.	.	.	.	.	.	.	E	.	.	D
228	AFM28685.1	106		.	.	.	.	.	.	.	.	.	.	.	.	.	.	.	.	.	.	.	.	.	.	.	.	.	.	.	.	.	.	.	.	.	.	.	.	.	.	.	.	.	.	E	.	.	D
229	ABV02561.1	97		.	.	.	.	.	.	.	.	.	.	.	.	.	.	.	.	.	.	.	.	.	.	.	.	.	.	.	.	.	.	.	.	.	.	.	.	.	.	.	.	.	.	.	.	.	D
230	AHI17030.1	105		.	.	.	.	.	.	.	.	.	.	.	.	.	.	.	.	.	.	.	.	.	.	.	.	.	.	.	.	.	.	.	.	.	.	.	.	.	.	.	.	.	.	E	.	.	D
231	CAB97186.1	122		.	.	.	.	.	.	.	.	.	.	.	.	.	.	.	.	.	.	.	.	.	.	.	.	.	.	.	.	.	.	.	.	.	.	.	.	.	.	.	.	.	.	E	.	.	D
232	CAB97182.1	122		.	.	.	.	.	.	.	.	.	.	.	.	.	.	.	.	.	.	.	.	.	.	.	.	.	.	.	.	.	.	.	.	.	.	.	.	.	.	.	.	.	.	E	.	.	D
233	AAG50141.1	130		.	.	.	.	.	.	.	.	.	.	.	.	.	.	.	.	.	.	.	.	.	.	.	.	.	.	.	.	.	.	.	.	.	.	.	.	.	.	.	.	.	.	.	.	.	D
234	AFM28678.1	106		.	.	.	.	.	.	.	.	.	.	.	.	.	.	.	.	.	.	.	.	.	.	.	.	.	.	.	.	.	.	.	.	.	.	.	.	.	.	.	.	.	.	E	.	.	D
235	AFM28902.1	106		.	.	.	.	.	.	.	.	.	.	.	.	.	.	.	.	.	.	.	.	.	.	.	.	.	.	.	.	.	.	.	.	.	.	.	.	.	.	.	.	.	.	.	.	.	D
236	ABV02564.1	97		.	.	.	.	.	.	.	.	.	.	.	.	.	.	.	.	.	.	.	.	.	.	.	.	.	.	.	.	.	.	.	.	.	.	.	.	.	.	.	.	.	.	.	.	.	D
237	CAB97201.1	122		.	.	.	.	.	.	.	.	.	.	.	.	.	.	.	.	.	.	.	.	.	.	.	.	.	.	.	.	.	.	.	.	.	.	.	X	.	.	.	.	.	.	E	.	.	D
238	AHI17024.1	105		.	.	.	.	.	.	.	.	.	.	.	.	.	.	.	.	.	.	.	.	.	.	.	.	.	.	.	.	.	.	.	.	.	.	.	.	.	.	.	.	.	.	E	.	.	D
239	ACR49654.1	117		.	.	.	.	.	.	.	.	.	.	.	.	.	.	.	.	.	.	.	.	.	.	.	.	.	.	.	.	.	.	.	.	.	.	.	.	.	.	.	.	.	.	E	.	.	D
240	ACR49695.1	117		.	.	.	.	.	.	.	.	.	.	.	.	.	.	.	.	.	.	.	.	.	.	.	.	.	.	.	.	.	.	.	.	.	.	.	.	.	.	.	.	.	.	E	.	.	D
241	ACR49668.1	117		.	.	.	.	.	.	.	.	.	.	.	.	.	.	.	.	.	.	.	.	.	.	.	.	.	.	.	.	.	.	.	.	.	.	.	.	.	.	.	.	.	.	E	.	.	D
242	ACR49690.1	117		.	.	.	.	.	.	.	.	.	.	.	.	.	.	.	.	.	.	.	.	.	.	.	.	.	.	.	.	.	.	.	.	.	.	.	.	.	.	.	.	.	.	E	.	.	D
243	CAD35624.1	15		.	.	.	.	.	.	.	.	.	.	.	.	.	.	.	.	.	.	.	.	.	.	.	.	.	.	.	.	.	.	.	.	.	.	.	.	.	.	.	.	.	.	.	.	.	D
244	ACR49672.1	117		.	.	.	.	.	.	.	.	.	.	.	.	.	.	.	.	.	.	.	.	.	.	.	.	.	.	.	.	.	.	.	.	.	.	.	.	.	.	.	.	.	.	E	.	.	D
245	AFM28558.1	106		.	.	.	.	.	.	.	.	.	.	.	.	.	.	.	.	.	.	.	.	.	.	.	.	.	.	.	.	.	.	.	.	.	.	.	.	.	.	.	.	.	.	E	.	.	D
246	ACA24154.1	120		.	.	.	.	.	.	.	.	.	.	.	.	.	.	.	.	.	.	.	.	.	.	.	.	.	.	.	.	.	.	.	.	.	.	.	.	.	.	.	.	.	.	.	.	.	.
247	CAD35594.1	15		.	.	.	.	.	.	.	.	.	.	.	.	.	.	.	.	.	.	.	.	.	.	.	.	.	.	.	.	.	.	.	.	.	.	.	.	.	K	.	.	.	.	.	.	.	D
248	AMM75882.1	96		.	.	.	.	.	.	.	.	.	.	.	.	.	.	.	.	.	.	.	.	.	.	.	.	.	.	.	.	.	.	.	.	.	.	.	.	.	.	.	.	.	.	E	.	.	D
249	AMX81235.1	66		.	.	.	.	.	.	.	.	.	.	.	.	.	.	.	.	.	.	.	.	.	.	.	.	.	.	.	.	.	.	.	.	.	.	.	.	.	.	.	.	.	.	.	.	.	D
250	BAM85451.1	130		.	.	.	.	.	.	.	.	.	.	.	.	.	.	.	.	.	.	.	.	.	.	.	.	.	.	.	.	.	.	.	.	.	.	.	.	.	.	.	.	.	.	E	.	.	D
251	AAG50140.1	130		.	.	.	.	.	.	.	.	.	.	.	.	.	.	.	.	.	.	.	.	.	.	.	.	.	.	.	.	.	.	.	.	.	.	.	.	.	.	.	.	.	.	.	.	.	D
252	BAM85443.1	130		.	.	.	.	.	.	.	.	.	.	.	.	.	.	.	.	.	.	.	.	.	.	.	.	.	.	.	.	.	.	.	.	.	.	.	.	.	.	.	.	.	.	E	.	.	D
253	ACB87765.1	130		.	.	.	.	.	.	.	.	.	.	.	.	.	.	.	.	.	.	.	.	.	.	.	.	.	.	.	.	.	.	.	.	.	.	.	.	.	.	.	.	.	.	E	.	.	D
254	ACB87811.1	130		.	.	.	.	.	.	.	.	.	.	.	.	.	.	.	.	.	.	.	.	.	.	.	.	.	.	.	.	.	.	.	.	.	.	.	.	.	.	.	.	.	.	E	.	.	D
255	BAM85445.1	130		.	.	.	.	.	.	.	.	.	.	.	.	.	.	.	.	.	.	.	.	.	.	.	.	.	.	.	.	.	.	.	.	.	.	.	.	.	.	.	.	.	.	E	.	.	D
256	AMM75837.1	102		.	.	.	.	.	.	.	.	.	.	.	.	.	.	.	.	.	.	.	.	.	.	.	.	.	.	.	.	.	.	.	.	.	.	.	.	.	K	.	.	.	.	.	.	.	D
257	AMP83883.1	22	Plasmodium falciparum 203_O	.	.	.	.	.	.	.	.	.	.	.	.	.	.	.	.	.	.	.	.	.	.	.	.	.	.	.	.	.	.	.	.	.	.	.	.	.	.	.	.	.	.	E	.	K	D
258	AFM28628.1	106		.	.	.	.	.	.	.	.	.	.	.	.	.	.	.	.	.	.	.	.	.	.	.	.	.	.	.	.	.	.	.	.	.	.	.	.	.	.	.	.	.	.	E	.	.	D
259	AMP83951.1	22		.	.	.	.	.	.	.	.	.	.	.	.	.	.	.	.	.	.	.	.	.	.	.	.	.	.	.	.	.	.	.	.	.	.	.	.	.	.	.	.	.	.	.	.	.	D
260	AFM28810.1	106		.	.	.	.	.	.	.	.	.	.	.	.	.	.	.	.	.	.	.	.	.	.	.	.	.	.	.	.	.	.	.	.	.	.	.	.	.	.	.	.	.	.	E	.	.	D
261	ACB87804.1	130		.	.	.	.	.	.	.	.	.	.	.	.	.	.	.	.	.	.	.	.	.	.	.	.	.	.	.	.	.	.	.	.	.	.	.	.	.	.	.	.	.	.	E	.	.	D
262	ACB87802.1	130		.	.	.	.	.	.	.	.	.	.	.	.	.	.	.	.	.	.	.	.	.	.	.	.	.	.	.	.	.	.	.	.	.	.	.	.	.	.	.	.	.	.	E	.	.	D
263	ACB87823.1	130		.	.	.	.	.	.	.	.	.	.	.	.	.	.	.	.	.	.	.	.	.	.	.	.	.	.	.	.	.	.	.	.	.	.	.	.	.	.	.	.	.	.	E	.	.	D
264	AFM28559.1	106		.	.	.	.	.	.	.	.	.	.	.	.	.	.	.	.	.	.	.	.	.	.	.	.	.	.	.	.	.	.	.	.	.	.	.	.	.	.	.	.	.	.	E	.	.	D
265	CAD35557.1	15		.	.	.	.	.	.	.	.	.	.	.	.	.	.	.	.	.	.	.	.	.	.	.	.	.	.	.	.	.	.	.	.	.	.	.	.	.	.	.	.	.	.	E	K	.	D
266	ACB87806.1	130		.	.	.	.	.	.	.	.	.	.	.	.	.	.	.	.	.	.	.	.	.	.	.	.	.	.	.	.	.	.	.	.	.	.	.	.	.	.	.	.	.	.	E	.	.	D
267	AMP83617.1	22		.	.	.	.	.	.	.	.	.	.	.	.	.	.	.	.	.	.	.	.	.	.	.	.	.	.	.	.	.	.	.	.	.	.	.	.	.	.	.	.	.	.	E	.	.	D
268	AFM28936.1	106		.	.	.	.	.	.	.	.	.	.	.	.	.	.	.	.	.	.	.	.	.	.	.	.	.	.	.	.	.	.	.	.	.	.	.	.	.	.	.	.	.	.	.	.	.	.
269	AXN69754.1	127		.	.	.	.	.	.	.	.	.	.	.	.	.	.	.	.	.	.	.	.	.	.	.	.	.	.	.	.	.	.	.	.	K	.	.	.	.	.	.	.	.	.	E	.	.	D
270	ACR49713.1	117		.	.	.	.	.	.	.	.	.	.	.	.	.	.	.	.	.	.	.	.	.	.	.	.	.	.	.	.	.	.	.	.	.	.	.	.	.	.	.	.	.	.	E	.	.	D
271	CAB97199.1	122		.	.	.	.	.	.	.	.	.	.	.	.	.	.	.	.	.	.	.	.	.	.	.	.	.	.	.	.	.	.	.	.	.	.	.	.	.	.	.	.	.	.	.	.	.	.
272	AMP83643.1	22	Plasmodium falciparum 38_N	.	.	.	.	.	.	.	.	.	.	.	.	.	.	.	.	.	.	.	.	.	.	.	.	.	.	.	.	.	.	.	.	.	.	.	.	.	.	.	.	.	.	E	.	K	D
273	AFM28526.1	106		.	.	.	.	.	.	.	.	.	.	.	.	.	.	.	.	.	.	.	.	.	.	.	.	.	.	.	.	.	.	.	.	K	.	.	.	.	.	.	.	.	.	E	.	.	D
274	CAD35601.1	15		.	.	.	.	.	.	.	.	.	.	.	.	.	.	.	.	.	.	.	.	.	.	.	.	.	.	.	.	.	.	.	.	.	.	.	.	.	.	.	.	.	.	.	.	.	.
275	BCL11752.1	130		.	.	.	.	.	.	.	.	.	.	.	.	.	.	.	.	.	.	.	.	.	.	.	.	.	.	.	.	.	.	.	.	.	.	.	.	.	.	.	.	.	.	E	.	.	D
276	AFM28785.1	106		.	.	.	.	.	.	.	.	.	.	.	.	.	.	.	.	.	.	.	.	.	.	.	.	.	.	.	.	.	.	.	.	.	.	.	.	.	.	.	.	.	.	E	.	.	D
277	ACB87763.1	130		.	.	.	.	.	.	.	.	.	.	.	.	.	.	.	.	.	.	.	.	.	.	.	.	.	.	.	.	.	.	.	.	.	.	.	.	.	.	.	.	.	.	E	.	.	D
278	ACB87828.1	130		.	.	.	.	.	.	.	.	.	.	.	.	.	.	.	.	.	.	.	.	.	.	.	.	.	.	.	.	.	.	.	.	.	.	.	.	.	.	.	.	.	.	E	.	.	D
279	AFM28632.1	106		.	.	.	.	.	.	.	.	.	.	.	.	.	.	.	.	.	.	.	.	.	.	.	.	.	.	.	.	.	.	.	.	.	.	.	.	.	.	.	.	.	.	E	.	.	D
280	AFM28517.1	106		.	.	.	.	.	.	.	.	.	.	.	.	.	.	.	.	.	.	.	.	.	.	.	.	.	.	.	.	.	.	.	.	.	.	.	.	.	.	.	.	.	.	E	.	.	D
281	USU92741.1	130		.	.	.	.	.	.	.	.	.	.	.	.	.	.	.	.	.	.	.	.	.	.	.	.	.	.	.	.	.	.	.	.	.	.	.	.	.	.	.	.	.	.	.	.	.	D
282	ACB87871.1	130		.	.	.	.	.	.	.	.	.	.	.	.	.	.	.	.	.	.	.	.	.	.	.	.	.	.	.	.	.	.	.	.	K	.	.	.	.	.	.	.	.	.	E	.	.	D
283	AMP83878.1	22		.	.	.	.	.	.	.	.	.	.	.	.	.	.	.	.	.	.	.	.	.	.	.	.	.	.	.	.	.	.	.	.	.	.	.	.	.	K	.	.	.	.	.	.	.	D
284	BAM85383.1	130		.	.	.	.	.	.	.	.	.	.	.	.	.	.	.	.	.	.	.	.	.	.	.	.	.	.	.	.	.	.	.	.	.	.	.	.	.	.	.	.	.	.	E	.	.	D
285	ACB87764.1	130		.	.	.	.	.	.	.	.	.	.	.	.	.	.	.	.	.	.	.	.	.	.	.	.	.	.	.	.	.	.	.	.	.	.	.	.	.	.	.	.	.	.	E	.	.	D
286	UIH11094.1	130		.	.	.	.	.	.	.	.	.	.	.	.	.	.	.	.	.	.	.	.	.	.	.	.	.	.	.	.	.	.	.	.	.	.	.	.	.	.	.	.	.	.	.	.	.	.
287	ABV02566.1	97		.	.	.	.	.	.	.	.	.	.	.	.	.	.	.	.	.	.	.	.	.	.	.	.	.	.	.	.	.	.	.	.	.	.	.	.	.	.	.	.	.	.	.	.	.	D
288	ACR49764.1	117		.	.	.	.	.	.	.	.	.	.	.	.	.	.	.	.	.	.	.	.	.	.	.	.	.	.	.	.	.	.	.	.	.	.	.	.	.	.	.	.	.	.	E	.	.	D
289	CAB97189.1	122		.	.	.	.	.	.	.	.	.	.	.	.	.	.	.	.	.	.	.	.	.	.	.	.	.	.	.	.	.	.	.	.	.	.	.	.	.	.	.	.	.	.	E	.	.	D
290	BAM85579.1	130		.	.	.	.	.	.	.	.	.	.	.	.	.	.	.	.	.	.	.	.	.	.	.	.	.	.	.	.	.	.	.	.	K	.	.	.	.	.	.	.	.	.	E	.	.	D
291	USU92742.1	130		.	.	.	.	.	.	.	.	.	.	.	.	.	.	.	.	.	.	.	.	.	.	.	.	.	.	.	.	.	.	.	.	.	.	.	.	.	.	.	.	.	.	.	.	.	D
292	AMP83630.1	22		.	.	.	.	.	.	.	.	.	.	.	.	.	.	.	.	.	.	.	.	.	.	.	.	.	.	.	.	.	.	.	.	.	.	.	.	.	.	.	.	.	.	E	.	.	D
293	UIH11093.1	130		.	.	.	.	.	.	.	.	.	.	.	.	.	.	.	.	.	.	.	.	.	.	.	.	.	.	.	.	.	.	.	.	.	.	.	.	.	.	.	.	.	.	.	.	.	.
294	UIH11103.1	130		.	.	.	.	.	.	.	.	.	.	.	.	.	.	.	.	.	.	.	.	.	.	.	.	.	.	.	.	.	.	.	.	.	.	.	.	.	.	.	.	.	.	.	.	.	.
295	BAM85529.1	130		.	.	.	.	.	.	.	.	.	.	.	.	.	.	.	.	.	.	.	.	.	.	.	.	.	.	.	.	.	.	.	.	K	.	.	.	.	.	.	.	.	.	E	.	.	D
296	AXN69734.1	127		.	.	.	.	.	.	.	.	.	.	.	.	.	.	.	.	.	.	.	.	.	.	.	.	.	.	.	.	.	.	.	.	.	.	.	.	.	.	.	.	.	.	.	.	.	.
297	UIH11086.1	130		.	.	.	.	.	.	.	.	.	.	.	.	.	.	.	.	.	.	.	.	.	.	.	.	.	.	.	.	.	.	.	.	.	.	.	.	.	.	.	.	.	.	.	.	.	.
298	UIH11118.1	130		.	.	.	.	.	.	.	.	.	.	.	.	.	.	.	.	.	.	.	.	.	.	.	.	.	.	.	.	.	.	.	.	.	.	.	.	.	.	.	.	.	.	.	.	.	.
299	UIH11211.1	130		.	.	.	.	.	.	.	.	.	.	.	.	.	.	.	.	.	.	.	.	.	.	.	.	.	.	.	.	.	.	.	.	.	.	.	.	.	.	.	.	.	.	.	.	.	.
300	CAD35644.1	15		.	.	.	.	.	.	.	.	.	.	.	.	.	.	.	.	.	.	.	.	.	.	.	.	.	.	.	.	.	.	.	.	.	.	.	.	.	.	.	.	.	.	E	.	.	D
301	CAD35585.1	15		.	.	.	.	.	.	.	.	.	.	.	.	.	.	.	.	.	.	.	.	.	.	.	.	.	.	.	.	.	.	.	.	.	.	.	.	.	K	.	.	.	.	.	.	.	D
302	UIH11199.1	130		.	.	.	.	.	.	.	.	.	.	.	.	.	.	.	.	.	.	.	.	.	.	.	.	.	.	.	.	.	.	.	.	.	.	.	.	.	.	.	.	.	.	.	.	.	.
303	UIH11100.1	130		.	.	.	.	.	.	.	.	.	.	.	.	.	.	.	.	.	.	.	.	.	.	.	.	.	.	.	.	.	.	.	.	.	.	.	.	.	.	.	.	.	.	.	.	.	.
304	AMP83622.1	22		.	.	.	.	.	.	.	.	.	.	.	.	.	.	.	.	.	.	.	.	.	.	.	.	.	.	.	.	.	.	.	.	.	.	.	.	.	.	.	.	.	.	E	.	.	D
305	UIH11180.1	130		.	.	.	.	.	.	.	.	.	.	.	.	.	.	.	.	.	.	.	.	.	.	.	.	.	.	.	.	.	.	.	.	.	.	.	.	.	.	.	.	.	.	.	.	.	.
306	UIH11091.1	130		.	.	.	.	.	.	.	.	.	.	.	.	.	.	.	.	.	.	.	.	.	.	.	.	.	.	.	.	.	.	.	.	.	.	.	.	.	.	.	.	.	.	.	.	.	.
307	UIH11138.1	130		.	.	.	.	.	.	.	.	.	.	.	.	.	.	.	.	.	.	.	.	.	.	.	.	.	.	.	.	.	.	.	.	.	.	.	.	.	.	.	.	.	.	.	.	.	.
308	UIH11111.1	130		.	.	.	.	.	.	.	.	.	.	.	.	.	.	.	.	.	.	.	.	.	.	.	.	.	.	.	.	.	.	.	.	.	.	.	.	.	.	.	.	.	.	.	.	.	.
309	UIH11098.1	130		.	.	.	.	.	.	.	.	.	.	.	.	.	.	.	.	.	.	.	.	.	.	.	.	.	.	.	.	.	.	.	.	.	.	.	.	.	.	.	.	.	.	.	.	.	.
310	ACB87800.1	130		.	.	.	.	.	.	.	.	.	.	.	.	.	.	.	.	.	.	.	.	.	.	.	.	.	.	.	.	.	.	.	.	.	.	.	.	.	.	.	.	.	.	.	.	.	.
311	UIH11134.1	130		.	.	.	.	.	.	.	.	.	.	.	.	.	.	.	.	.	.	.	.	.	.	.	.	.	.	.	.	.	.	.	.	.	.	.	.	.	.	.	.	.	.	.	.	.	.
312	UIH11159.1	130		.	.	.	.	.	.	.	.	.	.	.	.	.	.	.	.	.	.	.	.	.	.	.	.	.	.	.	.	.	.	.	.	.	.	.	.	.	.	.	.	.	.	.	.	.	.
313	UIH11129.1	130		.	.	.	.	.	.	.	.	.	.	.	.	.	.	.	.	.	.	.	.	.	.	.	.	.	.	.	.	.	.	.	.	.	.	.	.	.	.	.	.	.	.	.	.	.	.
314	UIH11090.1	130		.	.	.	.	.	.	.	.	.	.	.	.	.	.	.	.	.	.	.	.	.	.	.	.	.	.	.	.	.	.	.	.	.	.	.	.	.	.	.	.	.	.	.	.	.	.
315	UIH11087.1	130		.	.	.	.	.	.	.	.	.	.	.	.	.	.	.	.	.	.	.	.	.	.	.	.	.	.	.	.	.	.	.	.	.	.	.	.	.	.	.	.	.	.	.	.	.	.
316	UIH11105.1	130		.	.	.	.	.	.	.	.	.	.	.	.	.	.	.	.	.	.	.	.	.	.	.	.	.	.	.	.	.	.	.	.	.	.	.	.	.	.	.	.	.	.	.	.	.	.
317	UIH11088.1	130		.	.	.	.	.	.	.	.	.	.	.	.	.	.	.	.	.	.	.	.	.	.	.	.	.	.	.	.	.	.	.	.	.	.	.	.	.	.	.	.	.	.	.	.	.	.
318	UIH11196.1	130		.	.	.	.	.	.	.	.	.	.	.	.	.	.	.	.	.	.	.	.	.	.	.	.	.	.	.	.	.	.	.	.	.	.	.	.	.	.	.	.	.	.	.	.	.	.
319	CAD35656.1	15		.	.	.	.	.	.	.	.	.	.	.	.	.	.	.	.	.	.	.	.	.	.	.	.	.	.	.	.	.	.	.	.	K	.	.	.	.	.	.	.	.	.	E	.	.	D
320	ACB87790.1	130		.	.	.	.	.	.	.	.	.	.	.	.	.	.	.	.	.	.	.	.	.	.	.	.	.	.	.	.	.	.	.	.	.	.	.	.	.	.	.	.	.	.	E	.	.	D
321	AMP83667.1	22		.	.	.	.	.	.	.	.	.	.	.	.	.	.	.	.	.	.	.	.	.	.	.	.	.	.	.	.	.	.	.	.	K	.	.	.	.	.	.	.	.	.	E	.	.	D
322	ABV02568.1	97		.	.	.	.	.	.	.	.	.	.	.	.	.	.	.	.	.	.	.	.	.	.	.	.	.	.	.	.	.	.	.	.	.	.	.	.	.	.	.	.	.	.	.	.	.	D
323	CAB97195.1	122		.	.	.	.	.	.	.	.	.	.	.	.	.	.	.	.	.	.	.	.	.	.	.	.	.	.	.	.	.	.	.	.	.	.	.	.	.	.	.	.	.	.	E	.	.	D
324	ACB87814.1	130		.	.	.	.	.	.	.	.	.	.	.	.	.	.	.	.	.	.	.	.	.	.	.	.	.	.	.	.	.	.	.	.	.	.	.	.	.	.	.	.	.	.	E	.	.	D
325	CAB97184.1	122		.	.	.	.	.	.	.	.	.	.	.	.	.	.	.	.	.	.	.	.	.	.	.	.	.	.	.	.	.	.	.	.	.	.	.	.	.	.	.	.	.	.	E	.	.	D
326	UIH11101.1	130		.	.	.	.	.	.	.	.	.	.	.	.	.	.	.	.	.	.	.	.	.	.	.	.	.	.	.	.	.	.	.	.	.	.	.	.	.	.	.	.	.	.	.	.	.	.
327	AMP83709.1	22		.	.	.	.	.	.	.	.	.	.	.	.	.	.	.	.	.	.	.	.	.	.	.	.	.	.	.	.	.	.	.	.	K	.	.	.	.	.	.	.	.	.	E	.	.	D
328	BAM85388.1	130		.	.	.	.	.	.	.	.	.	.	.	.	.	.	.	.	.	.	.	.	.	.	.	.	.	.	.	.	.	.	.	.	.	.	.	.	.	.	.	.	.	.	E	.	.	D
329	AMP83614.1	22		.	.	.	.	.	.	.	.	.	.	.	.	.	.	.	.	.	.	.	.	.	.	.	.	.	.	.	.	.	.	.	.	.	.	.	.	.	K	.	.	.	.	.	.	.	D
330	AMP83661.1	22		.	.	.	.	.	.	.	.	.	.	.	.	.	.	.	.	.	.	.	.	.	.	.	.	.	.	.	.	.	.	.	.	.	.	.	.	.	K	.	.	.	.	.	.	.	D
331	BAM85373.1	130		.	.	.	.	.	.	.	.	.	.	.	.	.	.	.	.	.	.	.	.	.	.	.	.	.	.	.	.	.	.	.	.	.	.	.	.	.	.	.	.	.	.	E	.	.	D
332	AMX81239.1	66		.	.	.	.	.	.	.	.	.	.	.	.	.	.	.	.	.	.	.	.	.	.	.	.	.	.	.	.	.	.	.	.	.	.	.	.	.	.	.	.	.	.	.	K	.	D
333	EWC75820.1	130		.	.	.	.	.	.	.	.	.	.	.	.	.	.	.	.	.	.	.	.	.	.	.	.	.	.	.	.	.	.	.	.	.	.	.	.	.	.	.	.	.	.	.	.	.	.
334	AFM28523.1	106		.	.	.	.	.	.	.	.	.	.	.	.	.	.	.	.	.	.	.	.	.	.	.	.	.	.	.	.	.	.	.	.	.	.	.	.	.	.	.	.	.	.	E	.	.	D
335	BCL11781.1	130		.	.	.	.	.	.	.	.	.	.	.	.	.	.	.	.	.	.	.	.	.	.	.	.	.	.	.	.	.	.	.	.	.	.	.	.	.	.	.	.	.	.	.	.	.	.
336	ACR49731.1	117		.	.	.	.	.	.	.	.	.	.	.	.	.	.	.	.	.	.	.	.	.	.	.	.	.	.	.	.	.	.	.	.	.	.	.	.	.	.	.	.	.	.	E	.	.	D
337	AMP83611.1	22		.	.	.	.	.	.	.	.	.	.	.	.	.	.	.	.	.	.	.	.	.	.	.	.	.	.	.	.	.	.	.	.	.	.	.	.	.	K	.	.	.	.	.	.	.	D
338	AMP83618.1	22		.	.	.	.	.	.	.	.	.	.	.	.	.	.	.	.	.	.	.	.	.	.	.	.	.	.	.	.	.	.	.	.	.	.	.	.	.	K	.	.	.	.	.	.	.	D
339	ABV02562.1	97		.	.	.	.	.	.	.	.	.	.	.	.	.	.	.	.	.	.	.	.	.	.	.	.	.	.	.	.	.	.	.	.	.	.	.	.	.	.	.	.	.	.	.	.	.	D
340	ADM31352.1	3		.	.	.	.	.	.	.	.	.	.	.	.	.	.	.	.	.	.	.	.	.	.	.	.	.	.	.	.	.	.	.	.	K	.	.	.	.	.	.	.	.	.	E	.	.	D
341	CAD35647.1	15		.	.	.	.	.	.	.	.	.	.	.	.	.	.	.	.	.	.	.	.	.	.	.	.	.	.	.	.	.	.	.	.	K	.	.	.	.	.	.	.	.	.	E	.	.	D
342	ADM31347.1	7		.	.	.	.	.	.	.	.	.	.	.	.	.	.	.	.	.	.	.	.	.	.	.	.	.	.	.	.	.	.	.	.	.	.	.	.	.	K	.	.	.	.	.	.	.	D
343	ACR49766.1	117		.	.	.	.	.	.	.	.	.	.	.	.	.	.	.	.	.	.	.	.	.	.	.	.	.	.	.	.	.	.	.	.	.	.	.	.	.	.	.	.	.	.	.	.	.	D
344	ADM31370.1	2		.	.	.	.	.	.	.	.	.	.	.	.	.	.	.	.	.	.	.	.	.	.	.	.	.	.	.	.	.	.	.	.	.	.	.	.	.	K	.	.	.	.	.	.	.	D
345	ADM31344.1	2		.	.	.	.	.	.	.	.	.	.	.	.	.	.	.	.	.	.	.	.	.	.	.	.	.	.	.	.	.	.	.	.	.	.	.	.	.	K	.	.	.	.	.	.	.	D
346	UIH11186.1	130		.	.	.	.	.	.	.	.	.	.	.	.	.	.	.	.	.	.	.	.	.	.	.	.	.	.	.	.	.	.	.	.	.	.	.	.	.	.	.	.	.	.	.	.	.	.
347	AMP83637.1	22		.	.	.	.	.	.	.	.	.	.	.	.	.	.	.	.	.	.	.	.	.	.	.	.	.	.	.	.	.	.	.	.	K	.	.	.	.	.	.	.	.	.	E	.	.	D
348	ADM31369.1	4		.	.	.	.	.	.	.	.	.	.	.	.	.	.	.	.	.	.	.	.	.	.	.	.	.	.	.	.	.	.	.	.	.	.	.	.	.	K	.	.	.	.	.	.	.	D
349	AMP83613.1	22		.	.	.	.	.	.	.	.	.	.	.	.	.	.	I	.	.	.	.	.	.	.	.	.	.	.	.	.	.	.	.	.	.	.	.	.	.	K	.	.	.	.	.	.	.	D
350	UIH11156.1	130		.	.	.	.	.	.	.	.	.	.	.	.	.	.	.	.	.	.	.	.	.	.	.	.	.	.	.	.	.	.	.	.	.	.	.	.	.	.	.	.	.	.	.	.	.	.
351	BAM85429.1	130		.	.	.	.	.	.	.	.	.	.	.	.	.	.	.	.	.	.	.	.	.	.	.	.	.	.	.	.	.	.	.	.	.	.	.	.	.	.	.	.	.	.	E	.	.	D
352	AAG50146.1	130		.	.	.	.	.	.	.	.	.	.	.	.	.	.	.	.	.	.	.	.	.	.	.	.	.	.	.	.	.	.	.	.	.	.	.	.	.	K	.	.	.	.	.	.	.	D
353	UIH11104.1	130		.	.	.	.	.	.	.	.	.	.	.	.	.	.	.	.	.	.	.	.	.	.	.	.	.	.	.	.	.	.	.	.	.	.	.	.	.	.	.	.	.	.	.	.	.	.
354	BCL11741.1	130		.	.	.	.	.	.	.	.	.	.	.	.	.	.	.	.	.	.	.	.	.	.	.	.	.	.	.	.	.	.	.	.	.	.	.	.	.	.	.	.	.	.	.	.	.	.
355	AHI17031.1	105		.	.	.	.	.	.	.	.	.	.	.	.	.	.	.	.	.	.	.	.	.	.	.	.	.	.	.	.	.	.	.	.	.	.	.	.	.	.	.	.	.	.	E	K	.	D
356	UIH11095.1	130		.	.	.	.	.	.	.	.	.	.	.	.	.	.	.	.	.	.	.	.	.	.	.	.	.	.	.	.	.	.	.	.	.	.	.	.	.	.	.	.	.	.	.	.	.	.
357	BAM85450.1	130		.	.	.	.	.	.	.	.	.	.	.	.	.	.	.	.	.	.	.	.	.	.	.	.	.	.	.	.	.	.	.	.	.	.	.	.	.	.	.	.	.	.	.	K	.	D
358	AMP83778.1	22		.	.	.	.	.	.	.	.	.	.	.	.	.	.	.	.	.	.	.	.	.	.	.	.	.	.	.	.	.	.	.	.	.	.	.	.	.	.	.	.	.	.	E	.	.	D
359	BCL11755.1	130		.	.	.	.	.	.	.	.	.	.	.	.	.	.	.	.	.	.	.	.	.	.	.	.	.	.	.	.	.	.	.	.	.	.	.	.	.	.	.	.	.	.	E	.	.	D
360	UIH11140.1	130		.	.	.	.	.	.	.	.	.	.	.	.	.	.	.	.	.	.	.	.	.	.	.	.	.	.	.	.	.	.	.	.	.	.	.	.	.	.	.	.	.	.	.	.	.	.
361	BAV14244.1	130		.	.	.	.	.	.	.	.	.	.	.	.	.	.	.	.	.	.	.	.	.	.	.	.	.	.	.	.	.	.	.	.	.	.	.	.	.	.	.	.	.	.	E	.	.	D
362	AHI16989.1	105		.	.	.	.	.	.	.	.	.	.	.	.	.	.	.	.	.	.	.	.	.	.	.	.	.	.	.	.	.	.	.	.	.	.	.	.	.	.	.	.	.	.	.	.	.	D
363	AFM28827.1	106		.	.	.	.	.	.	.	.	.	.	.	.	.	.	.	.	.	.	.	.	.	.	.	.	.	.	.	.	.	.	.	.	.	.	.	.	.	.	.	.	.	.	.	.	.	D
364	ADM31353.1	2		.	.	.	.	.	.	.	.	.	.	.	.	.	.	.	.	.	.	.	.	.	.	.	.	.	.	.	.	.	.	.	.	.	.	.	.	.	K	.	.	.	.	.	.	.	D
365	CAB97192.1	122		.	.	.	.	.	.	.	.	.	.	.	.	.	.	.	.	.	.	.	.	.	.	.	.	.	.	.	.	.	.	.	.	.	.	.	.	.	.	.	.	.	.	.	.	.	D
366	BCL11715.1	130		.	.	.	.	.	.	.	.	.	.	.	.	.	.	.	.	.	.	.	.	.	.	.	.	.	.	.	.	.	.	.	.	K	.	.	.	.	.	.	.	.	.	E	.	.	D
367	CAD35646.1	15		.	.	.	.	.	.	.	.	.	.	.	.	.	.	.	.	.	.	.	.	.	.	.	.	.	.	.	.	.	.	.	.	.	.	.	.	.	.	.	.	.	.	E	.	.	D
368	CAD35580.1	15		.	.	.	.	.	.	.	.	.	.	.	.	.	.	.	.	.	.	.	.	.	.	.	.	.	.	.	.	.	.	.	.	.	.	.	.	.	K	.	.	.	.	.	K	.	D
369	BCL11754.1	130		.	.	.	.	.	.	.	.	.	.	.	.	.	.	.	.	.	.	.	.	.	.	.	.	.	.	.	.	.	.	.	.	K	.	.	.	.	.	.	.	.	.	E	.	.	D
370	AMM75877.1	94		.	.	.	.	.	.	.	.	.	.	.	.	.	.	.	.	.	.	.	.	.	.	.	.	.	.	.	.	.	.	.	.	.	.	.	.	.	.	.	.	.	.	X	.	.	X
371	CAD35584.1	15		.	.	.	.	.	.	.	.	.	.	.	.	.	.	.	.	.	.	.	.	.	.	.	.	.	.	.	.	.	.	.	.	.	.	.	.	.	K	.	.	.	.	.	E	.	D
372	AMP83879.1	22		.	.	.	.	.	.	.	.	.	.	.	.	.	.	.	.	.	.	.	.	.	.	.	.	.	.	.	.	.	.	.	.	.	.	.	.	.	K	.	.	.	.	.	.	.	D
373	AFM28816.1	106		.	.	.	.	.	.	.	.	.	.	.	.	.	.	.	.	.	.	.	.	.	.	.	.	.	.	.	.	.	.	.	.	.	.	.	.	.	.	.	.	.	.	.	.	.	D
374	ACR49756.1	117		.	.	.	.	.	.	.	.	.	.	.	.	.	.	.	.	.	.	.	.	.	.	.	.	.	.	.	.	.	.	.	.	.	.	.	.	.	.	.	.	.	.	E	.	.	D
375	AFM28537.1	106		.	.	.	.	.	.	.	.	.	.	.	.	.	.	.	.	.	.	.	.	.	.	.	.	.	.	.	.	.	.	.	.	.	.	.	.	.	.	.	.	.	.	.	.	.	D
376	AFM28568.1	106		.	.	.	.	.	.	.	.	.	.	.	.	.	.	.	.	.	.	.	.	.	.	.	.	.	.	.	.	.	.	.	.	.	.	.	.	.	.	.	.	.	.	.	.	.	D
377	AMP83681.1	22		.	.	.	.	.	.	.	.	.	.	.	.	.	.	.	.	.	.	.	.	.	.	.	.	.	.	.	.	.	.	.	.	.	.	.	.	.	K	.	.	.	.	.	.	.	D
378	AFM28720.1	106		.	.	.	.	.	.	.	.	.	.	.	.	.	.	.	.	.	.	.	.	.	.	.	.	.	.	.	.	.	.	.	.	.	.	.	.	.	.	.	.	.	.	.	.	.	D
379	AFM28519.1	106		.	.	.	.	.	.	.	.	.	.	.	.	.	.	.	.	.	.	.	.	.	.	.	.	.	.	.	.	.	.	.	.	.	.	.	.	.	.	.	.	.	.	.	.	.	D
380	AMP83805.1	22		.	.	.	.	.	.	.	.	.	.	.	.	.	.	.	.	.	.	.	.	.	.	.	.	.	.	.	.	.	.	.	.	K	.	.	.	.	.	.	.	.	.	E	.	.	D
381	AMM75853.1	22		.	.	.	.	.	.	.	.	.	.	.	.	.	.	.	.	.	.	.	.	.	.	.	.	.	.	.	.	.	.	.	.	.	.	.	.	.	K	.	.	.	.	.	.	.	D
382	AIR08610.1	94		.	.	.	.	.	.	.	.	.	.	.	.	.	.	.	.	.	.	.	.	.	.	.	.	.	.	.	.	.	.	.	.	.	.	.	.	.	.	.	.	.	.	E	K	.	N
383	ADM31337.1	5		.	.	.	.	.	.	.	.	.	.	.	.	.	.	.	.	.	.	.	.	.	.	.	.	.	.	.	.	.	.	.	.	K	.	.	.	.	.	.	.	.	.	E	.	.	D
384	AMM75839.1	42		.	.	.	.	.	.	.	.	.	.	.	.	.	.	I	.	.	.	.	.	.	.	.	.	.	.	.	.	.	.	.	.	.	.	.	.	.	K	.	.	.	.	.	.	.	D
385	ADM31332.1	2		.	.	.	.	.	.	.	.	.	.	.	.	.	.	.	.	.	.	.	.	.	.	.	.	.	.	.	.	.	.	.	.	.	.	.	.	.	K	.	.	.	.	.	.	.	D
386	AMP83616.1	22		.	.	.	.	.	.	.	.	.	.	.	.	.	.	.	.	.	.	.	.	.	.	.	.	.	.	.	.	.	.	.	.	K	.	.	.	.	.	.	.	.	.	E	.	.	D
387	AMP83795.1	22		.	.	.	.	.	.	.	.	.	.	.	.	.	.	.	.	.	.	.	.	.	.	.	.	.	.	.	.	.	.	.	.	.	.	.	.	.	.	.	.	.	.	E	.	.	D
388	AMM75878.1	103		.	.	.	.	.	.	.	.	.	.	.	.	.	.	.	.	.	.	.	.	.	.	.	.	.	.	.	.	.	.	.	.	.	.	.	.	.	K	.	.	.	.	.	.	.	D
389	CAD35611.1	15		.	.	.	.	.	.	.	.	.	.	.	.	.	.	.	.	.	.	.	.	.	.	.	.	.	.	.	.	.	.	.	.	.	.	.	.	.	K	.	.	.	.	.	.	.	D
390	BAM85405.1	130		.	.	.	.	.	.	.	.	.	.	.	.	.	.	.	.	.	.	.	.	.	.	.	.	.	.	.	.	.	.	.	.	K	.	.	.	.	.	.	.	.	.	E	.	.	D
391	ADM31342.1	3		.	.	.	.	.	.	.	.	.	.	.	.	.	.	.	.	.	.	.	.	.	.	.	.	.	.	.	.	.	.	.	.	K	.	.	.	.	.	.	.	.	.	E	.	.	D
392	BAM85654.1	130		.	.	.	.	.	.	.	.	.	.	.	.	.	.	.	.	.	.	.	.	.	.	.	.	.	.	.	.	.	.	.	.	.	.	.	.	.	.	.	.	.	.	.	.	.	D
393	BAM85583.1	130		.	.	.	.	.	.	.	.	.	.	.	.	.	.	.	.	.	.	.	.	.	.	.	.	.	.	.	.	.	.	.	.	.	.	.	.	.	.	.	.	.	.	.	.	.	D
394	BAM85601.1	130		.	.	.	.	.	.	.	.	.	.	.	.	.	.	.	.	.	.	.	.	.	.	.	.	.	.	.	.	.	.	.	.	.	.	.	.	.	.	.	.	.	.	.	.	.	D
395	ABE73116.1	48		.	.	.	.	.	.	.	.	.	.	.	.	.	.	.	.	.	.	.	.	.	.	.	.	.	.	.	.	.	.	.	.	.	.	.	.	.	.	.	.	.	R	.	.	.	.
396	CAD35600.1	15		.	.	.	.	.	.	.	.	.	.	.	.	.	.	.	.	.	.	.	.	.	.	.	.	.	.	.	.	.	.	.	.	.	.	.	.	.	K	.	.	.	.	.	.	.	D
397	AMM75884.1	91		.	.	.	.	.	.	.	.	.	.	.	.	.	.	.	.	.	.	.	.	.	.	.	.	.	.	.	.	.	.	.	.	.	.	.	.	.	.	.	.	.	.	.	.	.	X
398	AFM28561.1	106		.	.	.	.	.	.	.	.	.	.	.	.	.	.	.	.	.	.	.	.	.	.	.	.	.	.	.	.	.	.	.	.	K	.	.	.	.	.	.	.	.	.	E	.	.	D
399	AMM75889.1	100		.	.	.	.	.	.	.	.	.	.	.	.	.	.	.	.	.	.	.	.	.	.	.	.	.	.	.	.	.	.	.	.	.	.	.	.	.	.	.	.	.	.	E	.	.	D
400	UIH11146.1	130		.	.	.	.	.	.	.	.	.	.	.	.	.	.	.	.	.	.	.	.	.	.	.	.	.	.	.	.	.	.	.	.	.	.	.	.	.	.	.	.	.	.	.	.	.	.
401	AXN69772.1	127		.	.	.	.	.	.	.	.	.	.	.	.	.	.	.	.	.	.	.	.	.	.	.	.	.	.	.	.	.	.	.	.	.	.	.	.	.	.	.	.	.	.	E	.	.	D
402	BAV14298.1	130		.	.	.	.	.	.	.	.	.	.	.	.	.	.	.	.	.	.	.	.	.	.	.	.	.	.	.	.	.	.	.	.	.	.	.	.	.	.	.	.	.	.	E	.	.	D
403	AFM28946.1	106		.	.	.	.	.	.	.	.	.	.	.	.	.	.	.	.	.	.	.	.	.	.	.	.	.	.	.	.	.	.	.	.	.	.	.	.	.	K	.	.	.	.	.	.	.	D
404	CAD35625.1	15		.	.	.	.	.	.	.	.	.	.	.	.	.	.	.	.	.	.	.	.	.	.	.	.	.	.	.	.	.	.	.	.	.	.	.	.	.	.	.	.	.	.	.	K	.	D
405	AAG50142.1	130		.	.	.	.	.	.	.	.	.	.	.	.	.	.	.	.	.	.	.	.	.	.	.	.	.	.	.	.	.	.	.	.	.	.	.	.	.	.	.	.	.	.	.	K	.	D
406	AFM28524.1	106		.	.	.	.	.	.	.	.	.	.	.	.	.	.	.	.	.	.	.	.	.	.	.	.	.	.	.	.	.	.	.	.	.	.	.	.	.	.	.	.	.	.	V	.	.	D
407	AHI16984.1	105		.	.	.	.	.	.	.	.	.	.	.	.	.	.	.	.	.	.	.	.	.	.	.	.	.	.	.	.	.	.	.	.	.	.	.	.	.	.	.	.	.	.	E	K	.	D
408	AFM28715.1	106		.	.	.	.	.	.	.	.	.	.	.	.	.	.	I	.	.	.	.	.	.	.	.	.	.	.	.	.	.	.	.	.	.	.	.	.	.	K	.	.	.	.	.	.	.	D
409	AHI17054.1	105		.	.	.	.	.	.	.	.	.	.	.	.	.	.	.	.	.	.	.	.	.	.	.	.	.	.	.	.	.	.	.	.	.	.	.	.	.	.	.	.	.	.	E	K	.	D
410	ADM31334.1	4		.	.	.	.	.	.	.	.	.	.	.	.	.	.	.	.	.	.	.	.	.	.	.	.	.	.	.	.	.	.	.	.	.	.	.	.	.	K	.	.	.	.	.	.	.	D
411	AFM28735.1	106		.	.	.	.	.	.	.	.	.	.	.	.	.	.	I	.	.	.	.	.	.	.	.	.	.	.	.	.	.	.	.	.	.	.	.	.	.	K	.	.	.	.	.	.	.	D
412	AFM28899.1	106		.	.	.	.	.	.	.	.	.	.	.	.	.	.	I	.	.	.	.	.	.	.	.	.	.	.	.	.	.	.	.	.	.	.	.	.	.	K	.	.	.	.	.	.	.	D
413	CAD35602.1	15		.	.	.	.	.	.	.	.	.	.	.	.	.	.	.	.	.	.	.	.	.	.	.	.	.	.	.	.	.	.	.	.	.	.	.	.	.	K	.	.	.	.	.	.	.	D
414	BCL11712.1	130		.	.	.	.	.	.	.	.	.	.	.	.	.	.	.	.	.	.	.	.	.	.	.	.	.	.	.	.	.	.	.	.	.	.	.	.	.	.	.	.	.	.	.	.	.	.
415	KOB88964.1	130		.	.	.	.	.	.	.	.	.	.	.	.	.	.	.	.	.	.	.	.	.	.	.	.	.	.	.	.	.	.	.	.	.	.	.	.	.	.	.	.	.	.	.	.	.	.
416	AFM28620.1	106		.	.	.	.	.	.	.	.	.	.	.	.	.	.	I	.	.	.	.	.	.	.	.	.	.	.	.	.	.	.	.	.	.	.	.	.	.	K	.	.	.	.	.	.	.	D
417	AFM28702.1	106		.	.	.	.	.	.	.	.	.	.	.	.	.	.	.	.	.	.	.	.	.	.	.	.	.	.	.	.	.	.	.	.	.	.	.	.	.	K	.	.	.	.	.	.	.	D
418	AMP83772.1	22		.	.	.	.	.	.	.	.	.	.	.	.	.	.	.	.	.	.	.	.	.	.	.	.	.	.	.	.	.	.	.	.	.	.	.	.	.	K	.	.	.	.	.	.	.	D
419	AFM28680.1	106		.	.	.	.	.	.	.	.	.	.	.	.	.	.	.	.	.	.	.	.	.	.	.	.	.	.	.	.	.	.	.	.	.	.	.	.	.	.	.	.	.	.	E	.	.	D
420	AGL76295.1	75		.	.	.	.	.	.	.	.	.	.	.	.	.	.	.	.	.	.	.	.	.	.	.	.	.	.	.	.	.	.	.	.	.	.	.	.	.	.	.	.	.	.	.	.	.	D
421	BAM85527.1	130		.	.	.	.	.	.	.	.	.	.	.	.	.	.	.	.	.	.	.	.	.	.	.	.	.	.	.	.	.	.	.	.	.	.	.	.	.	.	.	.	.	.	E	.	.	D
422	AFM28612.1	106		.	.	.	.	.	.	.	.	.	.	.	.	.	.	.	.	.	.	.	.	.	.	.	.	.	.	.	.	.	.	.	.	K	.	.	.	.	.	.	.	.	.	E	.	.	D
423	AFM28638.1	106		.	.	.	.	.	.	.	.	.	.	.	.	.	.	.	.	.	.	.	.	.	.	.	.	.	.	.	.	.	.	.	.	K	.	.	.	.	.	.	.	.	.	E	.	.	D
424	BAM85380.1	130		.	.	.	.	.	.	.	.	.	.	.	.	.	.	.	.	.	.	.	.	.	.	.	.	.	.	.	.	.	.	.	.	.	.	.	.	.	K	.	.	.	.	.	.	.	D
425	BAM85566.1	130		.	.	.	.	.	.	.	.	.	.	.	.	.	.	.	.	.	.	.	.	.	.	.	.	.	.	.	.	.	.	.	.	.	.	.	.	.	.	.	.	.	.	E	.	.	D
426	BCL11767.1	130		.	.	.	.	.	.	.	.	.	.	.	.	.	.	.	.	.	.	.	.	.	.	.	.	.	.	.	.	.	.	.	.	.	.	.	.	.	.	.	.	.	.	.	.	.	.
427	AFM28539.1	106		.	.	.	.	.	.	.	.	.	.	.	.	.	.	.	.	.	.	.	.	.	.	.	.	.	.	.	.	.	.	.	.	K	.	.	.	.	.	.	.	.	.	E	.	.	D
428	UIH11194.1	130		.	.	.	.	.	.	.	.	.	.	.	.	.	.	.	.	.	.	.	.	.	.	.	.	.	.	.	.	.	.	.	.	.	.	.	.	.	.	.	.	.	.	E	.	.	D
429	AFM28565.1	106		.	.	.	.	.	.	.	.	.	.	.	.	.	.	.	.	.	.	.	.	.	.	.	.	.	.	.	.	.	.	.	.	K	.	.	.	.	.	.	.	.	.	E	.	.	D
430	ACR49718.1	117		.	.	.	.	.	.	.	.	.	.	.	.	.	.	.	.	.	.	.	.	.	.	.	.	.	.	.	.	.	.	.	.	.	.	.	.	.	.	.	.	.	.	E	.	.	D
431	AFM28739.1	106		.	.	.	.	.	.	.	.	.	.	.	.	.	.	.	.	.	.	.	.	.	.	.	.	.	.	.	.	.	.	.	.	K	.	.	.	.	.	.	.	.	.	E	.	.	D
432	AFM28728.1	106		.	.	.	.	.	.	.	.	.	.	.	.	.	.	.	.	.	.	.	.	.	.	.	.	.	.	.	.	.	.	.	.	.	.	.	.	.	.	.	.	.	.	E	.	.	D
433	AMM75856.1	42		.	.	.	.	.	.	.	.	.	.	.	.	.	.	.	.	.	.	.	.	.	.	.	.	.	.	.	.	.	.	.	.	.	.	.	.	.	.	.	.	.	.	E	.	.	D
434	BAM85406.1	130		.	.	.	.	.	.	.	.	.	.	.	.	.	.	.	.	.	.	.	.	.	.	.	.	.	.	.	.	.	.	.	.	.	.	.	.	.	.	.	.	.	.	.	.	.	D
435	AFM28535.1	106		.	.	.	.	.	.	.	.	.	.	.	.	.	.	.	.	.	.	.	.	.	.	.	.	.	.	.	.	.	.	.	.	.	.	.	.	.	.	.	.	.	.	E	.	.	D
436	ADM31333.1	2		.	.	.	.	.	.	.	.	.	.	.	.	.	.	.	.	.	.	.	.	.	.	.	.	.	.	.	.	.	.	.	.	.	.	.	.	.	K	.	.	.	.	E	.	.	D
437	ACR49697.1	117		.	.	.	.	.	.	.	.	.	.	.	.	.	.	.	.	.	.	.	.	.	.	.	.	.	.	.	.	.	.	.	.	.	.	.	.	.	K	.	.	.	.	.	.	.	D
438	AFM28838.1	106		.	.	.	.	.	.	.	.	.	.	.	.	.	.	.	.	.	.	.	.	.	.	.	.	.	.	.	.	.	.	.	.	K	.	.	.	.	.	.	.	.	.	E	.	.	D
439	AMM75867.1	104		.	.	.	.	.	.	.	.	.	.	.	.	.	.	.	.	.	.	.	.	.	.	.	.	.	.	.	.	.	.	.	.	K	.	.	.	.	.	.	.	.	.	E	.	.	D
440	ADM31365.1	5		.	.	.	.	.	.	.	.	.	.	.	.	.	.	.	.	.	.	.	.	.	.	.	.	.	.	.	.	.	.	.	.	K	.	.	.	.	.	.	.	.	.	E	.	.	D
441	CAD35631.1	15		.	.	.	.	.	.	.	.	.	.	.	.	.	.	.	.	.	.	.	.	.	.	.	.	.	.	.	.	.	.	.	.	K	.	.	.	.	.	.	.	.	.	E	.	.	D
442	AFM28920.1	106		.	.	.	.	.	.	.	.	.	.	.	.	.	.	.	.	.	.	.	.	.	.	.	.	.	.	.	.	.	.	.	.	.	.	.	.	.	.	.	.	.	.	.	.	.	D
443	AFM28881.1	106		.	.	.	.	.	.	.	.	.	.	.	.	.	.	.	.	.	.	.	.	.	.	.	.	.	.	.	.	.	.	.	.	.	.	.	.	.	.	.	.	.	.	.	.	.	D
444	BCL11772.1	130		.	.	.	.	.	.	.	.	.	.	.	.	.	.	.	.	.	.	.	.	.	.	.	.	.	.	.	.	.	.	.	.	.	.	.	.	.	K	.	.	.	.	.	.	.	D
445	AMM75847.1	103		.	.	.	.	.	.	.	.	.	.	.	.	.	.	I	.	.	.	.	.	.	.	.	.	.	.	.	.	.	.	.	.	.	.	.	.	.	K	.	.	.	.	.	.	.	D
446	CAD35629.1	15		.	.	.	.	.	.	.	.	.	.	.	.	.	.	.	.	.	.	.	.	.	.	.	.	.	.	.	.	.	.	.	.	K	.	.	.	.	.	.	.	.	.	E	.	.	D
447	AMM75851.1	46		.	.	.	.	.	.	.	.	.	.	.	.	.	.	.	.	.	.	.	.	.	.	.	.	.	.	.	.	.	.	.	.	K	.	.	.	.	.	.	.	.	.	E	.	.	D
448	AIR08607.1	94		.	.	.	.	.	.	.	.	.	.	.	.	.	.	.	.	.	.	.	.	.	.	.	.	.	.	.	.	.	.	.	.	.	.	.	.	.	.	.	.	.	.	.	.	.	D
449	AMP83663.1	22		.	.	.	.	.	.	.	.	.	.	.	.	.	.	.	.	.	.	.	.	.	.	.	.	.	.	.	.	.	.	.	.	.	.	.	.	.	K	.	.	.	.	.	.	.	D
450	AFM28830.1	106		.	.	.	.	.	.	.	.	.	.	.	.	.	.	.	.	.	.	.	.	.	.	.	.	.	.	.	.	.	.	.	.	K	.	.	.	.	.	.	.	.	.	E	.	.	D
451	AFM28570.1	106		.	.	.	.	.	.	.	.	.	.	.	.	.	.	.	.	.	.	.	.	.	.	.	.	.	.	.	.	.	.	.	.	K	.	.	.	.	.	.	.	.	.	E	.	.	D
452	AFM28556.1	106		.	.	.	.	.	.	.	.	.	.	.	.	.	.	.	.	.	.	.	.	.	.	.	.	.	.	.	.	.	.	.	.	.	.	.	.	.	.	.	.	.	.	.	K	.	D
453	AFM28662.1	106		.	.	.	.	.	.	.	.	.	.	.	.	.	.	.	.	.	.	.	.	.	.	.	.	.	.	.	.	.	.	.	.	K	.	.	.	.	.	.	.	.	.	E	.	.	D
454	AFM28773.1	106		.	.	.	.	.	.	.	.	.	.	.	.	.	.	.	.	.	.	.	.	.	.	.	.	.	.	.	.	.	.	.	.	.	.	.	.	.	.	.	.	.	.	.	.	.	D
455	AFM28771.1	106		.	.	.	.	.	.	.	.	.	.	.	.	.	.	.	.	.	.	.	.	.	.	.	.	.	.	.	.	.	.	.	.	.	.	.	.	.	.	.	.	.	.	.	.	.	D
456	AFM28705.1	106		.	.	.	.	.	.	.	.	.	.	.	.	.	.	.	.	.	.	.	.	.	.	.	.	.	.	.	.	.	.	.	.	K	.	.	.	.	.	.	.	.	.	E	.	.	D
457	AFM28536.1	106		.	.	.	.	.	.	.	.	.	.	.	.	.	.	.	.	.	.	.	.	.	.	.	.	.	.	.	.	.	.	.	.	K	.	.	.	.	.	.	.	.	.	E	.	.	D
458	AFM28582.1	106		.	.	.	.	.	.	.	.	.	.	.	.	.	.	.	.	.	.	.	.	.	.	.	.	.	.	.	.	.	.	.	.	K	.	.	.	.	.	.	.	.	.	E	.	.	D
459	AHI16986.1	105		.	.	.	.	.	.	.	.	.	.	.	.	.	.	.	.	.	.	.	.	.	.	.	.	.	.	.	.	.	.	.	.	K	.	.	.	.	.	.	.	.	.	E	.	.	D
460	AFM28850.1	106		.	.	.	.	.	.	.	.	.	.	.	.	.	.	.	.	.	.	.	.	.	.	.	.	.	.	.	.	.	.	.	.	K	.	.	.	.	.	.	.	.	.	E	.	.	D
461	AFM28846.1	106		.	.	.	.	.	.	.	.	.	.	.	.	.	.	.	.	.	.	.	.	.	.	.	.	.	.	.	.	.	.	.	.	K	.	.	.	.	.	.	.	.	.	E	.	.	D
462	AFM28646.1	106		.	.	.	.	.	.	.	.	.	.	.	.	.	.	.	.	.	.	.	.	.	.	.	.	.	.	.	.	.	.	.	.	K	.	.	.	.	.	.	.	.	.	E	.	.	D
463	AFM28843.1	106		.	.	.	.	.	.	.	.	.	.	.	.	.	.	.	.	.	.	.	.	.	.	.	.	.	.	.	.	.	.	.	.	K	.	.	.	.	.	.	.	.	.	E	.	.	D
464	AFM28803.1	106		.	.	.	.	.	.	.	.	.	.	.	.	.	.	.	.	.	.	.	.	.	.	.	.	.	.	.	.	.	.	.	.	K	.	.	.	.	.	.	.	.	.	E	.	.	D
465	AFM28653.1	106		.	.	.	.	.	.	.	.	.	.	.	.	.	.	.	.	.	.	.	.	.	.	.	.	.	.	.	.	.	.	.	.	K	.	.	.	.	.	.	.	.	.	E	.	.	D
466	AFM28789.1	106		.	.	.	.	.	.	.	.	.	.	.	.	.	.	.	.	.	.	.	.	.	.	.	.	.	.	.	.	.	.	.	.	.	.	.	.	.	K	.	.	.	.	E	.	.	D
467	AFM28955.1	106		.	.	.	.	.	.	.	.	.	.	.	.	.	.	.	.	.	.	.	.	.	.	.	.	.	.	.	.	.	.	.	.	K	.	.	.	.	.	.	.	.	.	E	.	.	D
468	ACR49724.1	117		.	.	.	.	.	.	.	.	.	.	.	.	.	.	.	.	.	.	.	.	.	.	.	.	.	.	.	.	.	.	.	.	.	.	.	.	.	.	.	.	.	.	V	.	.	D
469	AFM28957.1	106		.	.	.	.	.	.	.	.	.	.	.	.	.	.	.	.	.	.	.	.	.	.	.	.	.	.	.	.	.	.	.	.	K	.	.	.	.	.	.	.	.	.	E	.	.	D
470	AFM28950.1	106		.	.	.	.	.	.	.	.	.	.	.	.	.	.	.	.	.	.	.	.	.	.	.	.	.	.	.	.	.	.	.	.	.	.	.	.	.	.	.	.	.	.	.	.	.	.
471	AFM28942.1	106		.	.	.	.	.	.	.	.	.	.	.	.	.	.	.	.	.	.	.	.	.	.	.	.	.	.	.	.	.	.	.	.	.	.	.	.	.	K	.	.	.	.	.	.	.	D
472	AMX81234.1	66		.	.	.	.	.	.	.	.	.	.	.	.	.	.	.	.	.	.	.	.	.	.	.	.	.	.	.	.	.	.	.	.	.	.	.	.	.	.	.	.	.	.	.	K	.	D
473	AFM28798.1	106		.	.	.	.	.	.	.	.	.	.	.	.	.	.	.	.	.	.	.	.	.	.	.	.	.	.	.	.	.	.	.	.	.	.	.	.	.	K	.	.	.	.	.	.	.	D
474	CAD35640.1	15		.	.	.	.	.	.	.	.	.	.	.	.	.	.	.	.	.	.	.	.	.	.	.	.	.	.	.	.	.	.	.	.	.	.	.	.	.	.	.	.	.	.	E	.	.	D
475	AXN69774.1	127		.	.	.	.	.	.	.	.	.	.	.	.	.	.	.	.	.	.	.	.	.	.	.	.	.	.	.	.	.	.	.	.	.	.	.	.	.	.	.	.	.	.	E	K	.	D
476	AXN69733.1	127		.	.	.	.	.	.	.	.	.	.	.	.	.	.	.	.	.	.	.	.	.	.	.	.	.	.	.	.	.	.	.	.	.	.	.	.	.	.	.	.	.	.	E	K	.	D
477	ADM31339.1	7		.	.	.	.	.	.	.	.	.	.	.	.	.	.	.	.	.	.	.	.	.	.	.	.	.	.	.	.	.	.	.	.	.	.	.	.	.	K	.	.	.	.	E	.	.	N
478	AXN69773.1	127		.	.	.	.	.	.	.	.	.	.	.	.	.	.	.	.	.	.	.	.	.	.	.	.	.	.	.	.	.	.	.	.	.	.	.	.	.	.	.	.	.	.	E	K	.	D
479	AMP83787.1	22		.	.	.	.	.	.	.	.	.	.	.	.	.	.	.	.	.	.	.	.	.	.	.	.	.	.	.	.	.	.	.	.	.	.	.	.	.	K	.	.	.	.	.	.	.	D
480	ANS58318.1	130		.	.	.	.	.	.	.	.	.	.	.	.	.	.	.	.	.	.	.	.	.	.	.	.	.	.	.	.	.	.	.	.	.	.	.	.	.	.	.	.	.	.	E	.	.	D
481	AXN69732.1	127		.	.	.	.	.	.	.	.	.	.	.	.	.	.	.	.	.	.	.	.	.	.	.	.	.	.	.	.	.	.	.	.	.	.	.	.	.	.	.	.	.	.	E	K	.	D
482	AMP83609.1	22		.	.	.	.	.	.	.	.	.	.	.	.	.	.	.	.	.	.	.	.	.	.	.	.	.	.	.	.	.	.	.	.	.	.	.	.	.	K	.	.	.	.	.	.	.	D
483	AFM28972.1	106		.	.	.	.	.	.	.	.	.	.	.	.	.	.	.	.	.	.	.	.	.	.	.	.	.	.	.	.	.	.	.	.	K	.	.	.	.	.	.	.	.	.	E	.	.	D
484	AXN69779.1	127		.	.	.	.	.	.	.	.	.	.	.	.	.	.	.	.	.	.	.	.	.	.	.	.	.	.	.	.	.	.	.	.	.	.	.	.	.	.	.	.	.	.	E	K	.	D
485	BAM85656.1	130		.	.	.	.	.	.	.	.	.	.	.	.	.	.	.	.	.	.	.	.	.	.	.	.	.	.	.	.	.	.	.	.	.	.	.	.	.	K	.	.	.	.	.	.	.	D
486	AMM75842.1	42		.	.	.	.	.	.	.	.	.	.	.	.	.	.	.	.	.	.	.	.	.	.	.	.	.	.	.	.	.	.	.	.	.	.	.	.	.	.	.	.	.	.	E	.	.	D
487	BAM85686.1	130		.	.	.	.	.	.	.	.	.	.	.	.	.	.	.	.	.	.	.	.	.	.	.	.	.	.	.	.	.	.	.	.	.	.	.	.	.	.	.	.	.	.	E	K	.	D
488	BAM85595.1	130		.	.	.	.	.	.	.	.	.	.	.	.	.	.	.	.	.	.	.	.	.	.	.	.	.	.	.	.	.	.	.	.	.	.	.	.	.	.	.	.	.	.	E	K	.	D
489	AMP83770.1	22		.	.	.	.	.	.	.	.	.	.	.	.	.	.	.	.	.	.	.	.	.	.	.	.	.	.	.	.	.	.	.	.	.	.	.	.	.	.	.	.	.	.	E	.	.	D
490	AMM75845.1	25		.	.	.	.	.	.	.	.	.	.	.	.	.	.	.	.	.	.	.	.	.	.	.	.	.	.	.	.	.	.	.	.	.	.	.	.	.	K	.	.	.	.	.	.	.	D
491	ACB87862.1	130		.	.	.	.	.	.	.	.	.	.	.	.	.	.	.	.	.	.	.	.	.	.	.	.	.	.	.	.	.	.	.	.	.	.	.	.	.	.	.	.	.	.	V	.	.	D
492	AMP83693.1	22		.	.	.	.	.	.	.	.	.	.	.	.	.	.	.	.	.	.	.	.	.	.	.	.	.	.	.	.	.	.	.	.	.	.	.	.	.	.	.	.	.	.	E	.	.	D
493	AXN69781.1	127		.	.	.	.	.	.	.	.	.	.	.	.	.	.	.	.	.	.	.	.	.	.	.	.	.	.	.	.	.	.	.	.	K	.	.	.	.	.	.	.	.	.	E	.	.	D
494	ACB87900.1	130		.	.	.	.	.	.	.	.	.	.	.	.	.	.	.	.	.	.	.	.	.	.	.	.	.	.	.	.	.	.	.	.	.	.	.	.	.	.	.	.	.	.	E	K	.	D
495	ANS58282.1	130		.	.	.	.	.	.	.	.	.	.	.	.	.	.	.	.	.	.	.	.	.	.	.	.	.	.	.	.	.	.	.	.	.	.	.	.	.	.	.	.	.	.	E	K	.	D
496	AAG50143.1	130		.	.	.	.	.	.	.	.	.	.	.	.	.	.	.	.	.	.	.	.	.	.	.	.	.	.	.	.	.	.	.	.	.	.	.	.	.	.	.	.	.	.	E	K	.	D
497	BAV14245.1	130		.	.	.	.	.	.	.	.	.	.	.	.	.	.	.	.	.	.	.	.	.	.	.	.	.	.	.	.	.	.	.	.	.	.	.	.	.	K	.	.	.	.	.	.	.	D
498	BAM85642.1	130		.	.	.	.	.	.	.	.	.	.	.	.	.	.	.	.	.	.	.	.	.	.	.	.	.	.	.	.	.	.	.	.	.	.	.	.	.	.	.	.	.	.	E	.	.	D
499	BAN59390.1	130		.	.	.	.	.	.	.	.	.	.	.	.	.	.	.	.	.	.	.	.	.	.	.	.	.	.	.	.	.	.	.	.	K	.	.	.	.	.	.	.	.	.	E	.	.	D
500	BCL11713.1	130		.	.	.	.	.	.	.	.	.	.	.	.	.	.	I	.	.	.	.	.	.	.	.	.	.	.	.	.	.	.	.	.	.	.	.	.	.	K	.	.	.	.	.	.	.	D
501	AFM28543.1	106		.	.	.	.	.	.	.	.	.	.	.	.	.	.	.	.	.	.	.	.	.	.	.	.	.	.	.	.	.	.	.	.	.	.	.	.	.	K	.	.	.	.	.	.	.	D
502	ADM31346.1	7		.	.	.	.	.	.	.	.	.	.	.	.	.	.	.	.	.	.	.	.	.	.	.	.	.	.	.	.	.	.	.	.	K	.	.	.	.	.	.	.	.	.	E	.	.	D
503	BAM85460.1	130		.	.	.	.	.	.	.	.	.	.	.	.	.	.	.	.	.	.	.	.	.	.	.	.	.	.	.	.	.	.	.	.	K	.	.	.	.	.	.	.	.	.	E	.	.	D
504	AFM28611.1	106		.	.	.	.	.	.	.	.	.	.	.	.	.	.	.	.	.	.	.	.	.	.	.	.	.	.	.	.	.	.	.	.	.	.	.	.	.	K	.	.	.	.	.	.	.	D
505	BAM85361.1	130		.	.	.	.	.	.	.	.	.	.	.	.	.	.	.	.	.	.	.	.	.	.	.	.	.	.	.	.	.	.	.	.	K	.	.	.	.	.	.	.	.	.	E	.	.	D
506	AFM28978.1	106		.	.	.	.	.	.	.	.	.	.	.	.	.	.	.	.	.	.	.	.	.	.	.	.	.	.	.	.	.	.	.	.	K	.	.	.	.	.	.	.	.	.	E	.	.	D
507	AFM28959.1	106		.	.	.	.	.	.	.	.	.	.	.	.	.	.	.	.	.	.	.	.	.	.	.	.	.	.	.	.	.	.	.	.	.	.	.	.	.	K	.	.	.	.	.	.	.	D
508	AFM28538.1	106		.	.	.	.	.	.	.	.	.	.	.	.	.	.	.	.	.	.	.	.	.	.	.	.	.	.	.	.	.	.	.	.	K	.	.	.	.	.	.	.	.	.	E	.	.	D
509	ACB87872.1	130		.	.	.	.	.	.	.	.	.	.	.	.	.	.	.	.	.	.	.	.	.	.	.	.	.	.	.	.	.	.	.	.	K	.	.	.	.	.	.	.	.	.	E	.	.	D
510	AGL76289.1	75		.	.	.	.	.	.	.	.	.	.	.	.	.	.	.	.	.	.	.	.	.	.	.	.	.	.	.	.	.	.	.	.	K	.	.	.	.	.	.	.	.	.	E	.	.	D
511	AFM28627.1	106		.	.	.	.	.	.	.	.	.	.	.	.	.	.	.	.	.	.	.	.	.	.	.	.	.	.	.	.	.	.	.	.	K	.	.	.	.	.	.	.	.	.	E	.	.	D
512	ACB87842.1	130		.	.	.	.	.	.	.	.	.	.	.	.	.	.	.	.	.	.	.	.	.	.	.	.	.	.	.	.	.	.	.	.	.	.	.	.	.	.	.	.	.	.	.	.	.	D
513	AFM28581.1	106		.	.	.	.	.	.	.	.	.	.	.	.	.	.	.	.	.	.	.	.	.	.	.	.	.	.	.	.	.	.	.	.	.	.	.	.	.	K	.	.	.	.	.	.	.	D
514	AFM28648.1	106		.	.	.	.	.	.	.	.	.	.	.	.	.	.	.	.	.	.	.	.	.	.	.	.	.	.	.	.	.	.	.	.	.	.	.	.	.	K	.	.	.	.	.	.	.	D
515	AFM28749.1	106		.	.	.	.	.	.	.	.	.	.	.	.	.	.	.	.	.	.	.	.	.	.	.	.	.	.	.	.	.	.	.	.	.	.	.	.	.	K	.	.	.	.	.	.	.	D
516	AFM28693.1	106		.	.	.	.	.	.	.	.	.	.	.	.	.	.	.	.	.	.	.	.	.	.	.	.	.	.	.	.	.	.	.	.	.	.	.	.	.	K	.	.	.	.	.	.	.	D
517	AFM28721.1	106		.	.	.	.	.	.	.	.	.	.	.	.	.	.	.	.	.	.	.	.	.	.	.	.	.	.	.	.	.	.	.	.	.	.	.	.	.	K	.	.	.	.	.	.	.	D
518	AFM28832.1	106		.	.	.	.	.	.	.	.	.	.	.	.	.	.	.	.	.	.	.	.	.	.	.	.	.	.	.	.	.	.	.	.	.	.	.	.	.	K	.	.	.	.	.	.	.	D
519	AFM28697.1	106		.	.	.	.	.	.	.	.	.	.	.	.	.	.	.	.	.	.	.	.	.	.	.	.	.	.	.	.	.	.	.	.	.	.	.	.	.	.	.	.	.	.	.	.	.	D
520	ACR49711.1	117		.	.	.	.	.	.	.	.	.	.	.	.	.	.	.	.	.	.	.	.	.	.	.	.	.	.	.	.	.	.	.	.	.	.	.	.	.	.	.	.	.	.	.	.	.	D
521	AXN69731.1	127		.	.	.	.	.	.	.	.	.	.	.	.	.	.	.	.	.	.	.	.	.	.	.	.	.	.	.	.	.	.	.	.	.	.	.	.	.	.	.	.	.	.	.	.	.	.
522	AMM75849.1	41		.	.	.	.	.	.	.	.	.	.	.	.	.	.	.	.	.	.	.	.	.	.	.	.	.	.	.	.	.	.	.	.	.	.	.	.	.	.	.	.	.	.	E	.	.	D
523	AFM28940.1	106		.	.	.	.	.	.	.	.	.	.	.	.	.	.	.	.	.	.	.	.	.	.	.	.	.	.	.	.	.	.	.	.	K	.	.	.	.	.	.	.	.	.	E	.	.	D
524	AHI16985.1	105		.	.	.	.	.	.	.	.	.	.	.	.	.	.	.	.	.	.	.	.	.	.	.	.	.	.	.	.	.	.	.	.	K	.	.	.	.	.	.	.	.	.	E	.	.	D
525	AFM28667.1	106		.	.	.	.	.	.	.	.	.	.	.	.	.	.	.	.	.	.	.	.	.	.	.	.	.	.	.	.	.	.	.	.	.	.	.	.	.	K	.	.	.	.	E	.	.	D
526	AFM28802.1	106		.	.	.	.	.	.	.	.	.	.	.	.	.	.	.	.	.	.	.	.	.	.	.	.	.	.	.	.	.	.	.	.	.	.	.	.	.	K	.	.	.	.	E	.	.	D
527	AFM28893.1	106		.	.	.	.	.	.	.	.	.	.	.	.	.	.	.	.	.	.	.	.	.	.	.	.	.	.	.	.	.	.	.	.	.	.	.	.	.	K	.	.	.	.	.	.	.	D
528	AHI16995.1	105		.	.	.	.	.	.	.	.	.	.	.	.	.	.	.	.	.	.	.	.	.	.	.	.	.	.	.	.	.	.	.	.	.	.	.	.	.	K	.	.	.	.	.	.	.	D
529	AXN69725.1	127		.	.	.	.	.	.	.	.	.	.	.	.	.	.	.	.	.	.	.	.	.	.	.	.	.	.	.	.	.	.	.	.	.	.	.	.	.	.	.	.	.	.	.	.	.	D
530	AFM28613.1	106		.	.	.	.	.	.	.	.	.	.	.	.	.	.	.	.	.	.	.	.	.	.	.	.	.	.	.	.	.	.	.	.	K	.	.	.	.	.	.	.	.	.	E	.	.	D
531	AFM28935.1	106		.	.	.	.	.	.	.	.	.	.	.	.	.	.	.	.	.	.	.	.	.	.	.	.	.	.	.	.	.	.	.	.	.	.	.	.	.	.	.	.	.	.	E	.	.	D
532	AFM28707.1	106		.	.	.	.	.	.	.	.	.	.	.	.	.	.	.	.	.	.	.	.	.	.	.	.	.	.	.	.	.	.	.	.	.	.	.	.	.	.	.	.	.	.	E	.	.	D
533	AFM28616.1	106		.	.	.	.	.	.	.	.	.	.	.	.	.	.	.	.	.	.	.	.	.	.	.	.	.	.	.	.	.	.	.	.	.	.	.	.	.	.	.	.	.	.	E	.	.	D
534	AFM28525.1	106		.	.	.	.	.	.	.	.	.	.	.	.	.	.	.	.	.	.	.	.	.	.	.	F	.	.	.	.	.	.	.	.	.	.	.	.	.	.	.	.	.	.	.	.	.	D
535	AFM28602.1	106		.	.	.	.	.	.	.	.	.	.	.	.	.	.	.	.	.	.	.	.	.	.	.	.	.	.	.	.	.	.	.	.	.	.	.	.	.	.	.	.	.	.	E	.	.	D
536	ACR49759.1	117		.	.	.	.	.	.	.	.	.	.	.	.	.	.	.	.	.	.	.	.	.	.	.	.	.	.	.	.	.	.	.	.	K	.	.	.	.	.	.	.	.	.	E	.	.	D
537	AFM28824.1	106		.	.	.	.	.	.	.	.	.	.	.	.	.	.	.	.	.	.	.	.	.	.	.	.	.	.	.	.	.	.	.	.	.	.	.	.	.	.	.	.	.	.	E	.	.	D
538	AFM28852.1	106		.	.	.	.	.	.	.	.	.	.	.	.	.	.	.	.	.	.	.	.	.	.	.	.	.	.	.	.	.	.	.	.	.	.	.	.	.	K	.	.	.	.	E	.	.	D
539	AFM28563.1	106		.	.	.	.	.	.	.	.	.	.	.	.	.	.	.	.	.	.	.	.	.	.	.	.	.	.	.	.	.	.	.	.	.	.	.	.	.	K	.	.	.	.	E	.	.	D
540	AFM28744.1	106		.	.	.	.	.	.	.	.	.	.	.	.	.	.	.	.	.	.	.	.	.	.	.	.	.	.	.	.	.	.	.	.	.	.	.	.	.	.	.	.	.	.	E	.	.	D
541	AFM28904.1	106		.	.	.	.	.	.	.	.	.	.	.	.	.	.	.	.	.	.	.	.	.	.	.	.	.	.	.	.	.	.	.	.	.	.	.	.	.	K	.	.	.	.	.	.	.	D
542	CAB97185.1	122		.	.	.	.	.	.	.	.	.	.	.	.	.	.	.	.	.	.	.	.	.	.	.	.	.	.	.	.	.	.	.	.	.	.	.	.	.	.	.	.	.	.	E	.	.	D
543	ACR49750.1	117		.	.	.	.	.	.	.	.	.	.	.	.	.	.	.	.	.	.	.	.	.	.	.	.	.	.	.	.	.	.	.	.	K	.	.	.	.	.	.	.	.	.	E	.	.	D
544	ACR49660.1	117		.	.	.	.	.	.	.	.	.	.	.	.	.	.	.	.	.	.	.	.	.	.	.	.	.	.	.	.	.	.	.	.	K	.	.	.	.	.	.	.	.	.	E	.	.	D
545	AFM28593.1	106		.	.	.	.	.	.	.	.	.	.	.	.	.	.	.	.	.	.	.	.	.	.	.	.	.	.	.	.	.	.	.	.	.	.	.	.	.	K	.	.	.	.	E	.	.	D
546	AFM28605.1	106		.	.	.	.	.	.	.	.	.	.	.	.	.	.	I	.	.	.	.	.	.	.	.	.	.	.	.	.	.	.	.	.	.	.	.	.	.	K	.	.	.	.	.	.	.	D
547	AFM28575.1	106		.	.	.	.	.	.	.	.	.	.	.	.	.	.	.	.	.	.	.	.	.	.	.	.	.	.	.	.	.	.	.	.	.	.	.	.	.	.	.	.	.	.	E	.	.	D
548	AFM28622.1	106		.	.	.	.	.	.	.	.	.	.	.	.	.	.	.	.	.	.	.	.	.	.	.	.	.	.	.	.	.	.	.	.	.	.	.	.	.	.	.	.	.	.	E	.	.	D
549	AFM28717.1	106		.	.	.	.	.	.	.	.	.	.	.	.	.	.	.	.	.	.	.	.	.	.	.	.	.	.	.	.	.	.	.	.	.	.	.	.	.	K	.	.	.	.	E	.	.	D
550	AAC47107.1	130		.	.	.	.	.	.	.	.	.	.	.	.	.	.	.	.	.	.	.	.	.	.	.	.	.	.	.	.	.	.	.	.	K	.	.	.	.	.	.	.	.	.	E	.	.	D
551	AFM28746.1	106		.	.	.	.	.	.	.	.	.	.	.	.	.	.	.	.	.	.	.	.	.	.	.	.	.	.	.	.	.	.	.	.	.	.	.	.	.	.	.	.	.	.	E	.	.	D
552	AFM28901.1	106		.	.	.	.	.	.	.	.	.	.	.	.	.	.	.	.	.	.	.	.	.	.	.	.	.	.	.	.	.	.	.	.	.	.	.	.	.	K	.	.	.	.	E	.	.	D
553	AFM28647.1	106		.	.	.	.	.	.	.	.	.	.	.	.	.	.	.	.	.	.	.	.	.	.	.	.	.	.	.	.	.	.	.	.	.	.	.	.	.	.	.	.	.	.	E	.	.	D
554	BCL11790.1	130		.	.	.	.	.	.	.	.	.	.	.	.	.	.	.	.	.	.	.	.	.	.	.	.	.	.	.	.	.	.	.	.	.	.	.	.	.	K	.	.	.	.	.	.	.	D
555	BAM85486.1	130		.	.	.	.	.	.	.	.	.	.	.	.	.	.	.	.	.	.	.	.	.	.	.	.	.	.	.	.	.	.	.	.	.	.	.	.	.	.	.	.	.	.	.	.	.	.
556	AFM28691.1	106		.	.	.	.	.	.	.	.	.	.	.	.	.	.	.	.	.	.	.	.	.	.	.	.	.	.	.	.	.	.	.	.	.	.	.	.	.	.	.	.	.	.	E	.	.	D
557	AFM28564.1	106		.	.	.	.	.	.	.	.	.	.	.	.	.	.	.	.	.	.	.	.	.	.	.	.	.	.	.	.	.	.	.	.	.	.	.	.	.	K	.	.	.	.	.	.	.	D
558	AFM28848.1	106		.	.	.	.	.	.	.	.	.	.	.	.	.	.	.	.	.	.	.	.	.	.	.	.	.	.	.	.	.	.	.	.	.	.	.	.	.	.	.	.	.	.	E	.	.	D
559	AFM28649.1	106		.	.	.	.	.	.	.	.	.	.	.	.	.	.	.	.	.	.	.	.	.	.	.	.	.	.	.	.	.	.	.	.	.	.	.	.	.	K	.	.	.	.	.	.	.	D
560	ACB87792.1	130		.	.	.	.	.	.	.	.	.	.	.	.	.	.	.	.	.	.	.	.	.	.	.	.	.	.	.	.	.	.	.	.	K	.	.	.	.	.	.	.	.	.	E	.	.	D
561	BAM85371.1	130		.	.	.	.	.	.	.	.	.	.	.	.	.	.	.	.	.	.	.	.	.	.	.	.	.	.	.	.	.	.	.	.	K	.	.	.	.	.	.	.	.	.	E	.	.	D
562	ACB87808.1	130		.	.	.	.	.	.	.	.	.	.	.	.	.	.	.	.	.	.	.	.	.	.	.	.	.	.	.	.	.	.	.	.	.	.	.	.	.	K	.	.	.	.	.	.	.	D
563	BAM85392.1	130		.	.	.	.	.	.	.	.	.	.	.	.	.	.	.	.	.	.	.	.	.	.	.	.	.	.	.	.	.	.	.	.	K	.	.	.	.	.	.	.	.	.	E	.	.	D
564	AFM28567.1	106		.	.	.	.	.	.	.	.	.	.	.	.	.	.	.	.	.	.	.	.	.	.	.	.	.	.	.	.	.	.	.	.	.	.	.	.	.	K	.	.	.	.	.	.	.	D
565	AFM28631.1	106		.	.	.	.	.	.	.	.	.	.	.	.	.	.	.	.	.	.	.	.	.	.	.	.	.	.	.	.	.	.	.	.	.	.	.	.	.	K	.	.	.	.	.	.	.	D
566	ANS58290.1	130		.	.	.	.	.	.	.	.	.	.	.	.	.	.	.	.	.	.	.	.	.	.	.	.	.	.	.	.	.	.	.	.	.	.	.	.	.	.	.	.	.	.	.	.	.	D
567	AXN69765.1	127		.	.	.	.	.	.	.	.	.	.	.	.	.	.	.	.	.	.	.	.	.	.	.	.	.	.	.	.	.	.	.	.	.	.	.	.	.	.	.	.	.	.	.	.	.	D
568	ANS58286.1	130		.	.	.	.	.	.	.	.	.	.	.	.	.	.	.	.	.	.	.	.	.	.	.	.	.	.	.	.	.	.	.	.	.	.	.	.	.	K	.	.	.	.	.	.	.	D
569	AAG50145.1	130		.	.	.	.	.	.	.	.	.	.	.	.	.	.	.	.	.	.	.	.	.	.	.	.	.	.	.	.	.	.	.	.	K	.	.	.	.	.	.	.	.	.	E	.	.	D
570	BAM85362.1	130		.	.	.	.	.	.	.	.	.	.	.	.	.	.	.	.	.	.	.	.	.	.	.	.	.	.	.	.	.	.	.	.	K	.	.	.	.	.	.	.	.	.	E	.	.	D
571	ANS58311.1	130		.	.	.	.	.	.	.	.	.	.	.	.	.	.	.	.	.	.	.	.	.	.	.	.	.	.	.	.	.	.	.	.	.	.	.	.	.	.	.	.	.	.	.	.	.	D
572	AFM28529.1	106		.	.	.	.	.	.	.	.	.	.	.	.	.	.	.	.	.	.	.	.	.	.	.	.	.	.	.	.	.	.	.	.	.	.	.	.	.	K	.	.	.	.	.	.	.	D
573	AFM28918.1	106		.	.	.	.	.	.	.	.	.	.	.	.	.	.	.	.	.	.	.	.	.	.	.	.	.	.	.	.	.	.	.	.	.	.	.	.	.	K	.	.	.	.	.	.	.	D
574	AFM28945.1	106		.	.	.	.	.	.	.	.	.	.	.	.	.	.	.	.	.	.	.	.	.	.	.	.	.	.	.	.	.	.	.	.	.	.	.	.	.	.	.	.	.	.	E	.	.	D
575	ACB87899.1	130		.	.	.	.	.	.	.	.	.	.	.	.	.	.	.	.	.	.	.	.	.	.	.	.	.	.	.	.	.	.	.	.	K	.	.	.	.	.	.	.	.	.	E	.	.	D
576	AXN69726.1	127		.	.	.	.	.	.	.	.	.	.	.	.	.	.	.	.	.	.	.	.	.	.	.	.	.	.	.	.	.	.	.	.	.	.	.	.	.	.	.	.	.	.	.	.	.	.
577	AAG50134.1	130		.	.	.	.	.	.	.	.	.	.	.	.	.	.	.	.	.	.	.	.	.	.	.	.	.	.	.	.	.	.	.	.	.	.	.	.	.	.	.	.	.	.	E	.	.	D
578	AMP83728.1	22		.	.	.	.	.	.	.	.	.	.	.	.	.	.	.	.	.	.	.	.	.	.	.	.	.	.	.	.	.	.	.	.	.	.	.	.	.	K	.	.	.	.	.	.	.	D
579	P50491.1	130		.	.	.	.	.	.	.	.	.	.	.	.	.	.	.	.	.	.	.	.	.	.	.	.	.	.	.	.	.	.	.	.	K	.	.	.	.	.	.	.	.	.	E	.	.	D
580	AXN69764.1	127		.	.	.	.	.	.	.	.	.	.	.	.	.	.	.	.	.	.	.	.	.	.	.	.	.	.	.	.	.	.	.	.	.	.	.	.	.	.	.	.	.	.	.	.	.	D
581	CAB97187.1	122		.	.	.	.	.	.	.	.	.	.	.	.	.	.	.	.	.	.	.	.	.	.	.	.	.	.	.	.	.	.	.	.	.	.	.	.	.	.	.	.	.	.	E	.	.	D
582	ACB87780.1	130		.	.	.	.	.	.	.	.	.	.	.	.	.	.	.	.	.	.	.	.	.	.	.	.	.	.	.	.	.	.	.	.	.	.	.	.	.	.	.	.	.	.	.	.	.	.
583	AXN69768.1	127		.	.	.	.	.	.	.	.	.	.	.	.	.	.	.	.	.	.	.	.	.	.	.	.	.	.	.	.	.	.	.	.	.	.	.	.	.	.	.	.	.	.	E	.	.	D
584	BAM85399.1	130		.	.	.	.	.	.	.	.	.	.	.	.	.	.	.	.	.	.	.	.	.	.	.	.	.	.	.	.	.	.	.	.	K	.	.	.	.	.	.	.	.	.	E	.	.	D
585	ANS58287.1	130		.	.	.	.	.	.	.	.	.	.	.	.	.	.	.	.	.	.	.	.	.	.	.	.	.	.	.	.	.	.	.	.	.	.	.	.	.	K	.	.	.	.	.	.	.	D
586	ABE73117.1	48		.	.	.	.	.	.	.	.	.	.	.	.	.	.	.	.	.	.	.	.	.	.	.	.	.	.	.	.	.	.	.	.	.	.	.	.	.	K	.	.	.	.	.	.	.	D
587	AAG50130.1	130		.	.	.	.	.	.	.	.	.	.	.	.	.	.	.	.	.	.	.	.	.	.	.	.	.	.	.	.	.	.	.	.	.	.	.	.	.	K	.	.	.	.	.	.	.	.
588	AMP83825.1	22		.	.	.	.	.	.	.	.	.	.	.	.	.	.	.	.	.	.	.	.	.	.	.	.	.	.	.	.	.	.	.	.	.	.	.	.	.	.	.	.	.	.	.	K	.	D
589	BCL11747.1	130		.	.	.	.	.	.	.	.	.	.	.	.	.	.	.	.	.	.	.	.	.	.	.	.	.	.	.	.	.	.	.	.	.	.	.	.	.	.	.	.	.	.	.	.	.	.
590	AGL76294.1	75		.	.	.	.	.	.	.	.	.	.	.	.	.	.	.	.	.	.	.	.	.	.	.	.	.	.	.	.	.	.	.	.	.	.	.	.	.	K	.	.	.	.	.	.	.	D
591	BAM85555.1	130		.	.	.	.	.	.	.	.	.	.	.	.	.	.	.	.	.	.	.	.	.	.	.	.	.	.	.	.	.	.	.	.	K	.	.	.	.	.	.	.	.	.	E	.	.	D
592	BAM85436.1	130		.	.	.	.	.	.	.	.	.	.	.	.	.	.	.	.	.	.	.	.	.	.	.	.	.	.	.	.	.	.	.	.	K	.	.	.	.	.	.	.	.	.	E	.	.	D
593	ACB87775.1	130		.	.	.	.	.	.	.	.	.	.	.	.	.	.	.	.	.	.	.	.	.	.	.	.	.	.	.	.	.	.	.	.	.	.	.	.	.	.	.	.	.	.	.	.	.	D
594	ACB87837.1	130		.	.	.	.	.	.	.	.	.	.	.	.	.	.	.	.	.	.	.	.	.	.	.	.	.	.	.	.	.	.	.	.	K	.	.	.	.	.	.	.	.	.	E	.	.	D
595	BAV14289.1	130		.	.	.	.	.	.	.	.	.	.	.	.	.	.	.	.	.	.	.	.	.	.	.	.	.	.	.	.	.	.	.	.	K	.	.	.	.	.	.	.	.	.	E	.	.	D
596	UIH11176.1	130		.	.	.	.	.	.	.	.	.	.	.	.	.	.	.	.	.	.	.	.	.	.	.	.	.	.	.	.	.	.	.	.	.	.	.	.	.	.	.	.	.	.	.	.	.	D
597	AFM28671.1	106		.	.	.	.	.	.	.	.	.	.	.	.	.	.	.	.	.	.	.	.	.	.	.	.	.	.	.	.	.	.	.	.	.	.	.	.	.	K	.	.	.	.	.	.	.	D
598	AFM28675.1	106		.	.	.	.	.	.	.	.	.	.	.	.	.	.	.	.	.	.	.	.	.	.	.	.	.	.	.	.	.	.	.	.	K	.	.	.	.	.	.	.	.	.	E	.	.	D
599	BAM85440.1	130		.	.	.	.	.	.	.	.	.	.	.	.	.	.	.	.	.	.	.	.	.	.	.	.	.	.	.	.	.	.	.	.	K	.	.	.	.	.	.	.	.	.	E	.	.	D
600	BAM85452.1	130		.	.	.	.	.	.	.	.	.	.	.	.	.	.	.	.	.	.	.	.	.	.	.	.	.	.	.	.	.	.	.	.	K	.	.	.	.	.	.	.	.	.	E	.	.	D
601	BAM85427.1	130		.	.	.	.	.	.	.	.	.	.	.	.	.	.	.	.	.	.	.	.	.	.	.	.	.	.	.	.	.	.	.	.	K	.	.	.	.	.	.	.	.	.	E	.	.	D
602	ACB87903.1	130		.	.	.	.	.	.	.	.	.	.	.	.	.	.	.	.	.	.	.	.	.	.	.	.	.	.	.	.	.	.	.	.	.	.	.	.	.	.	.	.	.	.	E	.	.	D
603	BAM85703.1	130		.	.	.	.	.	.	.	.	.	.	.	.	.	.	.	.	.	.	.	.	.	.	.	.	.	.	.	.	.	.	.	.	K	.	.	.	.	.	.	.	.	.	E	.	.	D
604	ACB87870.1	130		.	.	.	.	.	.	.	.	.	.	.	.	.	.	.	.	.	.	.	.	.	.	.	.	.	.	.	.	.	.	.	.	K	.	.	.	.	.	.	.	.	.	E	.	.	D
605	ACB87877.1	130		.	.	.	.	.	.	.	.	.	.	.	.	.	.	.	.	.	.	.	.	.	.	.	.	.	.	.	.	.	.	.	.	.	.	.	.	.	.	.	.	.	.	E	.	.	D
606	BAV14297.1	130		.	.	.	.	.	.	.	.	.	.	.	.	.	.	.	.	.	.	.	.	.	.	.	.	.	.	.	.	.	.	.	.	.	.	.	.	.	.	.	.	.	.	.	.	.	.
607	ACB87831.1	130		.	.	.	.	.	.	.	.	.	.	.	.	.	.	.	.	.	.	.	.	.	.	.	.	.	.	.	.	.	.	.	.	K	.	.	.	.	.	.	.	.	.	E	.	.	D
608	AXN69784.1	127		.	.	.	.	.	.	.	.	.	.	.	.	.	.	.	.	.	.	.	.	.	.	.	.	.	.	.	.	.	.	.	.	.	.	.	.	.	K	.	.	.	.	.	.	.	D
609	USU92747.1	130		.	.	.	.	.	.	.	.	.	.	.	.	.	.	.	.	.	.	.	.	.	.	.	.	.	.	.	.	.	.	.	.	K	.	.	.	.	.	.	.	.	.	E	.	.	D
610	AFM28811.1	106		.	.	.	.	.	.	.	.	.	.	.	.	.	.	I	.	.	.	.	.	.	.	.	.	.	.	.	.	.	.	.	.	.	.	.	.	.	K	.	.	.	.	.	.	.	D
611	AFM28624.1	106		.	.	.	.	.	.	.	.	.	.	.	.	.	.	.	.	.	.	.	.	.	.	.	.	.	.	.	.	.	G	.	.	K	.	.	.	.	.	.	.	.	.	E	.	.	D
612	AFM28574.1	106		.	.	.	.	.	.	.	.	.	.	.	.	.	.	.	.	.	.	.	.	.	.	.	.	.	.	.	.	.	.	.	.	K	.	.	.	.	.	.	.	.	.	E	.	.	D
613	AFM28601.1	106		.	.	.	.	.	.	.	.	.	.	.	.	.	.	.	.	.	.	.	.	.	.	.	.	.	.	.	.	.	.	.	.	K	.	.	.	.	.	.	.	.	.	E	.	.	D
614	BAM85458.1	130		.	.	.	.	.	.	.	.	.	.	.	.	.	.	.	.	.	.	.	.	.	.	.	.	.	.	.	.	.	.	.	.	.	.	.	.	.	.	.	.	.	.	E	.	.	D
615	AFM28522.1	106		.	.	.	.	.	.	.	.	.	.	.	.	.	.	.	.	.	.	.	.	.	.	.	.	.	.	.	.	.	.	.	.	K	.	.	.	.	.	.	.	.	.	E	.	.	D
616	ANS58265.1	130		.	.	.	.	.	.	.	.	.	.	.	.	.	.	.	.	.	.	.	.	.	.	.	.	.	.	.	.	.	.	.	.	.	.	.	.	.	.	.	.	.	.	E	.	.	D
617	AMP83710.1	22		.	.	.	.	.	.	.	.	.	.	.	.	.	.	.	.	.	.	.	.	.	.	.	.	.	.	.	.	.	.	.	.	.	.	.	.	.	.	.	.	.	.	E	K	.	D
618	AHI17047.1	105		.	.	.	.	.	.	.	.	.	.	.	.	.	.	.	.	.	.	.	.	.	.	.	.	.	.	.	.	.	.	.	.	K	.	.	.	.	.	.	.	.	.	E	.	.	D
619	USU92739.1	130		.	.	.	.	.	.	.	.	.	.	.	.	.	.	.	.	.	.	.	.	.	.	.	.	.	.	.	.	.	.	.	.	.	.	.	.	.	.	.	.	.	.	.	.	.	D
620	AMM75843.1	42		.	.	.	.	.	.	.	.	.	.	.	.	.	.	.	.	.	.	.	.	.	.	.	.	.	.	.	.	.	.	.	.	K	.	.	.	.	.	.	.	.	.	E	.	.	D
621	ANS58319.1	130		.	.	.	.	.	.	.	.	.	.	.	.	.	.	.	.	.	.	.	.	.	.	.	.	.	.	.	.	.	.	.	.	.	.	.	.	.	K	.	.	.	.	.	.	.	D
622	ANS58299.1	130		.	.	.	.	.	.	.	.	.	.	.	.	.	.	.	.	.	.	.	.	.	.	.	.	.	.	.	.	.	.	.	.	.	.	.	.	.	K	.	.	.	.	.	.	.	D
623	BAV14288.1	130		.	.	.	.	.	.	.	.	.	.	.	.	.	.	.	.	.	.	.	.	.	.	.	.	.	.	.	.	.	.	.	.	K	.	.	.	.	.	.	.	.	.	E	.	.	D
624	BAM85556.1	130		.	.	.	.	.	.	.	.	.	.	.	.	.	.	.	.	.	.	.	.	.	.	.	.	.	.	.	.	.	.	.	.	.	.	.	.	.	K	.	.	.	.	.	.	.	D
625	AXN69727.1	127		.	.	.	.	.	.	.	.	.	.	.	.	.	.	.	.	.	.	.	.	.	.	.	.	.	.	.	.	.	.	.	.	.	.	.	.	.	.	.	.	.	.	.	.	.	D
626	AGL76288.1	75		.	.	.	.	.	.	.	.	.	.	.	.	.	.	.	.	.	.	.	.	.	.	.	.	.	.	.	.	.	.	.	.	K	.	.	.	.	.	.	.	.	.	E	.	.	D
627	ACB87754.1	130	Plasmodium falciparum 123_5	.	.	.	.	.	.	.	.	.	.	.	.	.	.	.	.	.	.	.	.	.	.	.	.	.	.	.	.	.	.	.	.	.	.	.	.	.	.	.	.	.	.	E	.	K	D
628	BAM85564.1	130		.	.	.	.	.	.	.	.	.	.	.	.	.	.	.	.	.	.	.	.	.	.	.	.	.	.	.	.	.	.	.	.	.	.	.	.	.	K	.	.	.	.	.	.	.	D
629	AMM75885.1	101		.	.	.	.	.	.	.	.	.	.	.	.	.	.	.	.	.	.	.	.	.	.	.	.	.	.	.	.	.	.	.	.	.	.	.	.	.	K	.	.	.	.	.	.	.	D
630	BAM85582.1	130		.	.	.	.	.	.	.	.	.	.	.	.	.	.	.	.	.	.	.	.	.	.	.	.	.	.	.	.	.	.	.	.	.	.	.	.	.	K	.	.	.	.	.	.	.	D
631	ACR49674.1	117		.	.	.	.	.	.	.	.	.	.	.	.	.	.	.	.	.	.	.	.	.	.	.	.	.	.	.	.	.	.	.	.	.	.	.	.	.	.	.	.	.	.	E	.	.	D
632	UIH11187.1	130		.	.	.	.	.	.	.	.	.	.	.	.	.	.	.	.	.	.	.	.	.	.	.	.	.	.	.	.	.	.	.	.	.	.	.	.	.	.	.	.	.	.	.	.	.	D
633	AFM28626.1	106		.	.	.	.	.	.	.	.	.	.	.	.	.	.	.	.	.	.	.	.	.	.	.	.	.	.	.	.	.	.	.	.	K	.	.	.	.	.	.	.	.	.	E	.	.	D
634	ACR49667.1	117		.	.	.	.	.	.	.	.	.	.	.	.	.	.	.	.	.	.	.	.	.	.	.	.	.	.	.	.	.	.	.	.	.	.	.	.	.	K	.	.	.	.	.	.	.	D
635	AFM28742.1	106		.	.	.	.	.	.	.	.	.	.	.	.	.	.	.	.	.	.	.	.	.	.	.	.	.	.	.	.	.	.	.	.	.	.	.	.	.	.	.	.	.	.	E	.	.	D
636	AMP83627.1	22		.	.	.	.	.	.	.	.	.	.	.	.	.	.	.	.	.	.	.	.	.	.	.	.	.	.	.	.	.	.	.	.	.	.	.	.	.	.	.	.	.	.	E	.	.	D
637	BAM85561.1	130	Plasmodium falciparum Pal97-042	.	.	.	.	.	.	.	.	.	.	.	.	.	.	.	.	.	.	.	.	.	.	.	.	.	.	.	.	.	.	.	.	.	.	.	.	.	.	.	.	.	.	E	.	K	D
638	AFM28673.1	106		.	.	.	.	.	.	.	.	.	.	.	.	.	.	.	.	.	.	.	.	.	.	.	.	.	.	.	.	.	.	.	.	K	.	.	.	.	.	.	.	.	.	E	.	.	D
639	ABV02571.1	97		.	.	.	.	.	.	.	.	.	.	.	.	.	.	.	.	.	.	.	.	.	.	.	.	.	.	.	.	.	.	.	.	.	.	.	.	.	K	.	.	.	.	.	.	.	D
640	UIH11212.1	130		.	.	.	.	.	.	.	.	.	.	.	.	.	.	.	.	.	.	.	.	.	.	.	.	.	.	.	.	.	.	.	.	.	.	.	.	.	.	.	.	.	.	.	.	.	D
641	ACR49745.1	117		.	.	.	.	.	.	.	.	.	.	.	.	.	.	.	.	.	.	.	.	.	.	.	.	.	.	.	.	.	.	.	.	.	.	.	.	.	K	.	.	.	.	.	.	.	D
642	AFM28599.1	106		.	.	.	.	.	.	.	.	.	.	.	.	.	.	.	.	.	.	.	.	.	.	.	.	.	.	.	.	.	.	.	.	.	.	.	.	.	.	.	.	.	.	E	.	.	D
643	ACR49682.1	117		.	.	.	.	.	.	.	.	.	.	.	.	.	.	.	.	.	.	.	.	.	.	.	.	.	.	.	.	.	.	.	.	.	.	.	.	.	K	.	.	.	.	.	.	.	D
644	AFM28553.1	106		.	.	.	.	.	.	.	.	.	.	.	.	.	.	.	.	.	.	.	.	.	.	.	.	.	.	.	.	.	.	.	.	.	.	.	.	.	.	.	.	.	.	E	.	.	D
645	ACR49679.1	117		.	.	.	.	.	.	.	.	.	.	.	.	.	.	.	.	.	.	.	.	.	.	.	.	.	.	.	.	.	.	.	.	K	.	.	.	.	.	.	.	.	.	E	.	.	D
646	BAM85417.1	130		.	.	.	.	.	.	.	.	.	.	.	.	.	.	.	.	.	.	.	.	.	.	.	.	.	.	.	.	.	.	.	.	.	.	.	.	.	.	.	.	.	.	E	.	.	D
647	ACB87751.1	130		.	.	.	.	.	.	.	.	.	.	.	.	.	.	.	.	.	.	.	.	.	.	.	.	.	.	.	.	.	.	.	.	.	.	.	.	.	.	.	.	.	.	E	.	K	D
648	AFM28880.1	106		.	.	.	.	.	.	.	.	.	.	.	.	.	.	.	.	.	.	.	.	.	.	.	.	.	.	.	.	.	.	.	.	.	.	.	.	.	K	.	.	.	.	E	.	.	D
649	AAC47105.1	118		.	.	.	.	.	.	.	.	.	.	.	.	.	.	.	.	.	.	.	.	.	.	.	.	.	.	.	.	.	.	.	.	.	.	.	.	.	.	.	.	.	.	E	K	.	D
650	ACB87773.1	130		.	.	.	.	.	.	.	.	.	.	.	.	.	.	.	.	.	.	.	.	.	.	.	.	.	.	.	.	.	.	.	.	.	.	.	.	.	K	.	.	.	.	.	.	.	D
651	UIH11179.1	130		.	.	.	.	.	.	.	.	.	.	.	.	.	.	.	.	.	.	.	.	.	.	.	.	.	.	.	.	.	.	.	.	.	.	.	.	.	.	.	.	.	.	.	.	.	D
652	UIH11107.1	130		.	.	.	.	.	.	.	.	.	.	.	.	.	.	.	.	.	.	.	.	.	.	.	.	.	.	.	.	.	.	.	.	.	.	.	.	.	.	.	.	.	.	.	.	.	D
653	CAB97194.1	122		.	.	.	.	.	.	.	.	.	.	.	.	.	.	.	.	.	.	.	.	.	.	.	.	.	.	.	.	.	.	.	.	.	.	.	.	.	.	.	.	.	.	E	.	.	D
654	UIH11144.1	130		.	.	.	.	.	.	.	.	.	.	.	.	.	.	.	.	.	.	.	.	.	.	.	.	.	.	.	.	.	.	.	.	.	.	.	.	.	.	.	.	.	.	.	.	.	D
655	ACR49715.1	117		.	.	.	.	.	.	.	.	.	.	.	.	.	.	.	.	.	.	.	.	.	.	.	.	.	.	.	.	.	.	.	.	.	.	.	.	.	.	.	.	.	.	E	.	.	D
656	BAM85631.1	130		.	.	.	.	.	.	.	.	.	.	.	.	.	.	.	.	.	.	.	.	.	.	.	.	.	.	.	.	.	.	.	.	.	.	.	.	.	.	.	.	.	.	.	.	.	D
657	AFM28841.1	106		.	.	.	.	.	.	.	.	.	.	.	.	.	.	.	.	.	.	.	.	.	.	.	.	.	.	.	.	.	.	.	.	.	.	.	.	.	K	.	.	.	.	.	.	.	D
658	AFM28752.1	106		.	.	.	.	.	.	.	.	.	.	.	.	.	.	.	.	.	.	.	.	.	.	.	.	.	.	.	.	.	.	.	.	.	.	.	.	.	K	.	.	.	.	.	.	.	D
659	UIH11119.1	130		.	.	.	.	.	.	.	.	.	.	.	.	.	.	.	.	.	.	.	.	.	.	.	.	.	.	.	.	.	.	.	.	.	.	.	.	.	.	.	.	.	.	.	.	.	D
660	AXN69745.1	127		.	.	.	.	.	.	.	.	.	.	.	.	.	.	.	.	.	.	.	.	.	.	.	.	.	.	.	.	.	.	.	.	.	.	.	.	.	.	.	.	.	.	E	K	.	D
661	AXN69746.1	127		.	.	.	.	.	.	.	.	.	.	.	.	.	.	.	.	.	.	.	.	.	.	.	.	.	.	.	.	.	.	.	.	.	.	.	.	.	.	.	.	.	.	E	K	.	D
662	AFM28668.1	106		.	.	.	.	.	.	.	.	.	.	.	.	.	.	.	.	.	.	.	.	.	.	.	.	.	.	.	.	.	.	.	.	K	.	.	.	.	.	.	.	.	.	E	.	.	D
663	ACR49666.1	117		.	.	.	.	.	.	.	.	.	.	.	.	.	.	.	.	.	.	.	.	.	.	.	.	.	.	.	.	.	.	.	.	.	.	.	.	.	.	.	.	.	.	E	.	.	D
664	ACR49706.1	117		.	.	.	.	.	.	.	.	.	.	.	.	.	.	.	.	.	.	.	.	.	.	.	.	.	.	.	.	.	.	.	.	.	.	.	.	.	.	.	.	.	.	E	.	.	D
665	AFM28756.1	106		.	.	.	.	.	.	.	.	.	.	.	.	.	.	.	.	.	.	.	.	.	.	.	.	.	.	.	.	.	.	.	.	.	.	.	.	.	K	.	.	.	.	.	.	.	D
666	AFM28766.1	106		.	.	.	.	.	.	.	.	.	.	.	.	.	.	.	.	.	.	.	.	.	.	.	.	.	.	.	.	.	.	.	.	.	.	.	.	.	K	.	.	.	.	.	.	.	D
667	ACR49726.1	117		.	.	.	.	.	.	.	.	.	.	.	.	.	.	.	.	.	.	.	.	.	.	.	.	.	.	.	.	.	.	.	.	.	.	.	.	.	.	.	.	.	.	E	.	.	D
668	ACR49722.1	117		.	.	.	.	.	.	.	.	.	.	.	.	.	.	.	.	.	.	.	.	.	.	.	.	.	.	.	.	.	.	.	.	.	.	.	.	.	.	.	.	.	.	E	.	.	D
669	AMM75840.1	45		.	.	.	.	.	.	.	.	.	.	.	.	.	.	.	.	.	.	.	.	.	.	.	.	.	.	.	.	.	.	.	.	.	.	.	.	.	K	.	.	.	.	.	.	.	D
670	ACR49665.1	117		.	.	.	.	.	.	.	.	.	.	.	.	.	.	.	.	.	.	.	.	.	.	.	.	.	.	.	.	.	.	.	.	.	.	.	.	.	.	.	.	.	.	E	.	.	D
671	ANS58309.1	130		.	.	.	.	.	.	.	.	.	.	.	.	.	.	.	.	.	.	.	.	.	.	.	.	.	.	.	.	.	.	.	.	K	.	.	.	.	.	.	.	.	.	E	.	.	D
672	AAB50405.1	130		.	.	.	.	.	.	.	.	.	.	.	.	.	.	.	.	.	.	.	.	.	.	.	.	.	.	.	.	.	.	.	.	.	.	.	.	.	.	.	.	.	.	.	.	.	.
673	ACB87836.1	130		.	.	.	.	.	.	.	.	.	.	.	.	.	.	.	.	.	.	.	.	.	.	.	.	.	.	.	.	.	.	.	.	K	.	.	.	.	.	.	.	.	.	E	.	.	D
674	BAM85360.1	130		.	.	.	.	.	.	.	.	.	.	.	.	.	.	.	.	.	.	.	.	.	.	.	.	.	.	.	.	.	.	.	.	K	.	.	.	.	.	.	.	.	.	E	.	.	D
675	ACR49688.1	117		.	.	.	.	.	.	.	.	.	.	.	.	.	.	.	.	.	.	.	.	.	.	.	.	.	.	.	.	.	.	.	.	.	.	.	.	.	.	.	.	.	.	E	.	.	D
676	ACB87812.1	130		.	.	.	.	.	.	.	.	.	.	.	.	.	.	.	.	.	.	.	.	.	.	.	.	.	.	.	.	.	.	.	.	.	.	.	.	.	K	.	.	.	.	.	.	.	D
677	ACR49692.1	117		.	.	.	.	.	.	.	.	.	.	.	.	.	.	.	.	.	.	.	.	.	.	.	.	.	.	.	.	.	.	.	.	.	.	.	.	.	K	.	.	.	.	.	.	.	D
678	ACB87830.1	130		.	.	.	.	.	.	.	.	.	.	.	.	.	.	.	.	.	.	.	.	.	.	.	.	.	.	.	.	.	.	.	.	.	.	.	.	.	K	.	.	.	.	.	.	.	D
679	USU92736.1	130		.	.	.	.	.	.	.	.	.	.	.	.	.	.	.	.	.	.	.	.	.	.	.	.	.	.	.	.	.	.	.	.	.	.	.	.	.	K	.	.	.	.	.	.	.	D
680	USU92744.1	130		.	.	.	.	.	.	.	.	.	.	.	.	.	.	.	.	.	.	.	.	.	.	.	.	.	.	.	.	.	.	.	.	.	.	.	.	.	K	.	.	.	.	.	.	.	D
681	AFM28919.1	106		.	.	.	.	.	.	.	.	.	.	.	.	.	.	.	.	.	.	.	.	.	.	.	.	.	.	.	.	.	.	.	.	.	.	.	.	.	.	.	.	.	.	.	K	.	D
682	AFM28911.1	106		.	.	.	.	.	.	.	.	.	.	.	.	.	.	.	.	.	.	.	.	.	.	.	.	.	.	.	.	.	.	.	.	K	.	.	.	.	.	.	.	.	.	E	.	.	D
683	AFM28617.1	106		.	.	.	.	.	.	.	.	.	.	.	.	.	.	.	.	.	.	.	.	.	.	.	.	.	.	.	.	.	.	.	.	K	.	.	.	.	.	.	.	.	.	E	.	.	D
684	USU92740.1	130		.	.	.	.	.	.	.	.	.	.	.	.	.	.	.	.	.	.	.	.	.	.	.	.	.	.	.	.	.	.	.	.	.	.	.	.	.	K	.	.	.	.	.	.	.	D
685	BAM85470.1	130		.	.	.	.	.	.	.	.	.	.	.	.	.	.	.	.	.	.	.	.	.	.	.	.	.	.	.	.	.	.	.	.	.	.	.	.	.	.	.	.	.	.	E	K	.	D
686	AAG50131.1	130		.	.	.	.	.	.	.	.	.	.	.	.	.	.	.	.	.	.	.	.	.	.	.	.	.	.	.	.	.	.	.	.	.	.	.	.	.	K	.	.	.	.	.	.	.	D
687	BAM85521.1	130		.	.	.	.	.	.	.	.	.	.	.	.	.	.	.	.	.	.	.	.	.	.	.	.	.	.	.	.	.	.	.	.	.	.	.	.	.	.	.	.	.	.	E	K	.	D
688	BAM85671.1	130		.	.	.	.	.	.	.	.	.	.	.	.	.	.	.	.	.	.	.	.	.	.	.	.	.	.	.	.	.	.	.	.	.	.	.	.	.	.	.	.	.	.	E	K	.	D
689	AXN69723.1	127		.	.	.	.	.	.	.	.	.	.	.	.	.	.	.	.	.	.	.	.	.	.	.	.	.	.	.	.	.	.	.	.	K	.	.	.	.	.	.	.	.	.	E	.	.	D
690	ACR49748.1	117		.	.	.	.	.	.	.	.	.	.	.	.	.	.	.	.	.	.	.	.	.	.	.	.	.	.	.	.	.	.	.	.	.	.	.	.	.	K	.	.	.	.	.	.	.	D
691	ACR49662.1	117		.	.	.	.	.	.	.	.	.	.	.	.	.	.	.	.	.	.	.	.	.	.	.	.	.	.	.	.	.	.	.	.	.	.	.	.	.	K	.	.	.	.	E	.	.	D
692	ACR49744.1	117		.	.	.	.	.	.	.	.	.	.	.	.	.	.	.	.	.	.	.	.	.	.	.	.	.	.	.	.	.	.	.	.	K	.	.	.	.	.	.	.	.	.	E	.	.	D
693	ACR49710.1	117		.	.	.	.	.	.	.	.	.	.	.	.	.	.	.	.	.	.	.	.	.	.	.	.	.	.	.	.	.	.	.	.	.	.	.	.	.	K	.	.	.	.	.	.	.	D
694	ACR49707.1	117		.	.	.	.	.	.	.	.	.	.	.	.	.	.	.	.	.	.	.	.	.	.	.	.	.	.	.	.	.	.	.	.	.	.	.	.	.	K	.	.	.	.	.	.	.	D
695	ACR49751.1	117		.	.	.	.	.	.	.	.	.	.	.	.	.	.	.	.	.	.	.	.	.	.	.	.	.	.	.	.	.	.	.	.	.	.	.	.	.	K	.	.	.	.	.	.	.	D
696	ACR49741.1	117		.	.	.	.	.	.	.	.	.	.	.	.	.	.	.	.	.	.	.	.	.	.	.	.	.	.	.	.	.	.	.	.	.	.	.	.	.	K	.	.	.	.	.	.	.	D
697	BAM85367.1	130		.	.	.	.	.	.	.	.	.	.	.	.	.	.	.	.	.	.	.	.	.	.	.	.	.	.	.	.	.	.	.	.	.	.	.	.	.	.	.	.	.	.	E	.	.	D
698	BCL11734.1	130		.	.	.	.	.	.	.	.	.	.	.	.	.	.	.	.	.	.	.	.	.	.	.	.	.	.	.	.	.	.	.	.	.	.	.	.	.	.	.	.	.	.	E	.	.	D
699	ACR49685.1	117		.	.	.	.	.	.	.	.	.	.	.	.	.	.	.	.	.	.	.	.	.	.	.	.	.	.	.	.	.	.	.	.	.	.	.	.	.	K	.	.	.	.	.	.	.	D
700	ANS58285.1	130		.	.	.	.	.	.	.	.	.	.	.	.	.	.	.	.	.	.	.	.	.	.	.	.	.	.	.	.	.	.	.	.	K	.	.	.	.	.	.	.	.	.	.	.	.	D
701	AHI17026.1	105		.	.	.	.	.	.	.	.	.	.	.	.	.	.	.	.	.	.	.	.	.	.	.	.	.	.	.	.	.	.	.	.	.	.	.	.	.	.	.	.	.	.	E	.	.	D
702	AHI16998.1	105		.	.	.	.	.	.	.	.	.	.	.	.	.	.	.	.	.	.	.	.	.	.	.	.	.	.	.	.	.	.	.	.	.	.	.	.	.	K	.	.	.	.	.	K	.	D
703	ACR49705.1	117		.	.	.	.	.	.	.	.	.	.	.	.	.	.	.	.	.	.	.	.	.	.	.	.	.	.	.	.	.	.	.	.	.	.	.	.	.	K	.	.	.	.	E	.	.	D
704	CAB97183.1	122		.	.	.	.	.	.	.	.	.	.	.	.	.	.	X	.	.	.	.	.	.	.	.	.	.	.	.	.	.	.	.	.	.	.	.	.	.	K	.	.	.	.	.	.	.	D
705	USU92746.1	130		.	.	.	.	.	.	.	.	.	.	.	.	.	.	.	.	.	.	.	.	.	.	.	.	.	.	.	.	.	.	.	.	.	.	.	.	.	K	.	.	.	.	.	.	.	D
706	CAB66387.1	122		.	.	.	.	.	.	.	.	.	.	.	.	.	.	V	.	.	.	.	.	.	.	.	.	.	.	.	.	.	.	.	.	.	.	.	.	.	.	.	.	.	.	.	.	.	D
707	AFM28856.1	122		.	.	.	.	.	.	.	.	.	.	.	.	.	.	.	.	.	.	.	.	.	.	.	.	.	.	.	.	.	.	.	.	.	.	.	.	.	.	.	.	.	.	E	.	.	D
708	AFM28719.1	106		.	.	.	.	.	.	.	.	.	.	.	.	.	.	.	.	.	.	.	.	.	.	.	.	.	.	.	.	.	.	.	.	.	.	.	.	.	.	.	.	.	.	E	.	.	D
709	BAM85516.1	130		.	.	.	.	.	.	.	.	.	.	.	.	.	.	.	.	.	.	.	.	.	.	.	.	.	.	.	.	.	.	.	.	.	.	.	.	.	.	.	.	.	.	E	K	.	D
710	USU92735.1	130		.	.	.	.	.	.	.	.	.	.	.	.	.	.	.	.	.	.	.	.	.	.	.	.	.	.	.	.	.	.	.	.	.	.	.	.	.	K	.	.	.	.	.	.	.	D
711	AAG50132.1	130		.	.	.	.	.	.	.	.	.	.	.	.	.	.	.	.	.	.	.	.	.	.	.	.	.	.	.	.	.	.	.	.	K	.	.	.	.	.	.	.	.	.	E	.	.	D
712	AFM28585.1	106		.	.	.	.	.	.	.	.	.	.	.	.	.	.	.	.	.	.	.	.	.	.	.	.	.	.	.	.	.	.	.	.	K	.	.	.	.	.	.	.	.	.	E	.	.	D
713	AFM28857.1	118		.	.	.	.	.	.	.	.	.	.	.	.	.	.	.	.	.	.	.	.	.	.	.	.	.	.	.	.	.	.	.	.	.	.	.	.	.	.	.	.	.	.	E	.	.	D
714	ACB87868.1	130		.	.	.	.	.	.	.	.	.	.	.	.	.	.	.	.	.	.	.	.	.	.	.	.	.	.	.	.	.	.	.	.	.	.	.	.	.	.	.	.	.	.	E	.	.	D
715	AFM28689.1	106		.	.	.	.	.	.	.	.	.	.	.	.	.	.	.	.	.	.	.	.	.	.	.	.	.	.	.	.	.	.	.	.	K	.	.	.	.	.	.	.	.	.	E	.	.	D
716	BCL11773.1	130		.	.	.	.	.	.	.	.	.	.	.	.	.	.	.	.	.	.	.	.	.	.	.	.	.	.	.	.	.	.	.	.	.	.	.	.	.	.	.	.	.	.	E	.	.	D
717	ACB87854.1	130		.	.	.	.	.	.	.	.	.	.	.	.	.	.	.	.	.	.	.	.	.	.	.	.	.	.	.	.	.	.	.	.	.	.	.	.	.	.	.	.	.	.	E	.	.	D
718	ACB87807.1	130		.	.	.	.	.	.	.	.	.	.	.	.	.	.	.	.	.	.	.	.	.	.	.	.	.	.	.	.	.	.	.	.	.	.	.	.	.	.	.	.	.	.	E	.	.	D
719	AFM28609.1	106		.	.	.	.	.	.	.	.	.	.	.	.	.	.	.	.	.	.	.	.	.	.	.	.	.	.	.	.	.	.	.	.	.	.	.	.	.	.	.	.	.	.	.	.	.	D
720	ACB87835.1	130		.	.	.	.	.	.	.	.	.	.	.	.	.	.	.	.	.	.	.	.	.	.	.	.	.	.	.	.	.	.	.	.	.	.	.	.	.	K	.	.	.	.	.	.	.	D
721	BAM85592.1	130		.	.	.	.	.	.	.	.	.	.	.	.	.	.	.	.	.	.	.	.	.	.	.	.	.	.	.	.	.	.	.	.	.	.	.	.	.	.	.	.	.	.	E	.	.	D
722	BAM85596.1	130		.	.	.	.	.	.	.	.	.	.	.	.	.	.	.	.	.	.	.	.	.	.	.	.	.	.	.	.	.	.	.	.	.	.	.	.	.	K	.	.	.	.	.	.	.	D
723	AFM28598.1	106		.	.	.	.	.	.	.	.	.	.	.	.	.	.	I	.	.	.	.	.	.	.	.	.	.	.	.	.	.	.	.	.	.	.	.	.	.	K	.	.	.	.	.	.	.	D
724	ACB87844.1	130		.	.	.	.	.	.	.	.	.	.	.	.	.	.	.	.	.	.	.	.	.	.	.	.	.	.	.	.	.	.	.	.	.	.	.	.	.	.	.	.	.	.	E	.	.	D
725	ACB87867.1	130		.	.	.	.	.	.	.	.	.	.	.	.	.	.	.	.	.	.	.	.	.	.	.	.	.	.	.	.	.	.	.	.	.	.	.	.	.	.	.	.	.	.	E	.	.	D
726	BAM85374.1	130		.	.	.	.	.	.	.	.	.	.	.	.	.	.	.	.	.	.	.	.	.	.	.	.	.	.	.	.	.	.	.	.	.	.	.	.	.	.	.	.	.	.	E	.	.	D
727	ACB87820.1	130		.	.	.	.	.	.	.	.	.	.	.	.	.	.	.	.	.	.	.	.	.	.	.	.	.	.	.	.	.	.	.	.	.	.	.	.	.	.	.	.	.	.	E	.	.	D
728	ACB87838.1	130		.	.	.	.	.	.	.	.	.	.	.	.	.	.	.	.	.	.	.	.	.	.	.	.	.	.	.	.	.	.	.	.	.	.	.	.	.	K	.	.	.	.	E	.	.	D
729	BAM85542.1	130		.	.	.	.	.	.	.	.	.	.	.	.	.	.	.	.	.	.	.	.	.	.	.	.	.	.	.	.	.	.	.	.	.	.	.	.	.	K	.	.	.	.	.	.	.	D
730	AMM75864.1	95		.	.	.	.	.	.	.	.	.	.	.	.	.	.	.	.	.	.	.	.	.	.	.	.	.	.	.	.	.	.	.	.	X	.	.	.	.	.	.	.	.	.	E	.	.	D
731	ACB87822.1	130		.	.	.	.	.	.	.	.	.	.	.	.	.	.	.	.	.	.	.	.	.	.	.	.	.	.	.	.	.	.	.	.	K	.	.	.	.	.	.	.	.	.	E	.	.	D
732	ACB87825.1	130		.	.	.	.	.	.	.	.	.	.	.	.	.	.	.	.	.	.	.	.	.	.	.	.	.	.	.	.	.	.	.	.	.	.	.	.	.	.	.	.	.	.	E	.	.	D
733	AXN69763.1	127		.	.	.	.	.	.	.	.	.	.	.	.	.	.	.	.	.	.	.	.	.	.	.	.	.	.	.	.	.	.	.	.	K	.	.	.	.	.	.	.	.	.	E	.	.	D
734	ANS58302.1	130		.	.	.	.	.	.	.	.	.	.	.	.	.	.	.	.	.	.	.	.	.	.	.	.	.	.	.	.	.	.	.	.	.	.	.	.	.	K	.	.	.	.	.	.	.	D
735	USU92738.1	130		.	.	.	.	.	.	.	.	.	.	.	.	.	.	.	.	.	.	.	.	.	.	.	.	.	.	.	.	.	.	.	.	.	.	.	.	.	.	.	.	.	.	.	K	.	D
736	BAV14246.1	130		.	.	.	.	.	.	.	.	.	.	.	.	.	.	.	.	.	.	.	.	.	.	.	.	.	.	.	.	.	.	.	.	.	.	.	.	.	K	.	.	.	.	.	.	.	D
737	BCL11757.1	130		.	.	.	.	.	.	.	.	.	.	.	.	.	.	.	.	.	.	.	.	.	.	.	.	.	.	.	.	.	.	.	.	.	.	.	.	.	K	.	.	.	.	.	.	.	D
738	ACB87848.1	130		.	.	.	.	.	.	.	.	.	.	.	.	.	.	.	.	.	.	.	.	.	.	.	.	.	.	.	.	.	.	.	.	.	.	.	.	.	K	.	.	.	.	.	.	.	D
739	KNG77083.1	130		.	.	.	.	.	.	.	.	.	.	.	.	.	.	.	.	.	.	.	.	.	.	.	.	.	.	.	.	.	.	.	.	.	.	.	.	.	K	.	.	.	.	.	.	.	D
740	BAM85456.1	130		.	.	.	.	.	.	.	.	.	.	.	.	.	.	.	.	.	.	.	.	.	.	.	.	.	.	.	.	.	.	.	.	.	.	.	.	.	K	.	.	.	.	.	.	.	D
741	ACR49656.1	117		.	.	.	.	.	.	.	.	.	.	.	.	.	.	I	.	.	.	.	.	.	.	.	.	.	.	.	.	.	.	.	.	.	.	.	.	.	K	.	.	.	.	.	.	.	D
742	ACB87756.1	130		.	.	.	.	.	.	.	.	.	.	.	.	.	.	.	.	.	.	.	.	.	.	.	.	.	.	.	.	.	.	.	.	.	.	.	.	.	K	.	.	.	.	.	.	.	D
743	ACB87767.1	130		.	.	.	.	.	.	.	.	.	.	.	.	.	.	.	.	.	.	.	.	.	.	.	.	.	.	.	.	.	.	.	.	.	.	.	.	.	K	.	.	.	.	.	.	.	D
744	P50489.1	130		.	.	.	.	.	.	.	.	.	.	.	.	.	.	.	.	.	.	.	.	.	.	.	.	.	.	.	.	.	.	.	.	.	.	.	.	.	K	.	.	.	.	.	.	.	D
745	USU92731.1	130		.	.	.	.	.	.	.	.	.	.	.	.	.	.	.	.	.	.	.	.	.	.	.	.	.	.	.	.	.	.	.	.	.	.	.	.	.	K	.	.	.	.	.	.	.	D
746	ACA24144.1	120		.	.	.	.	.	.	.	.	.	.	.	.	.	.	.	.	.	.	.	.	.	.	.	.	.	.	.	.	.	.	.	.	.	.	.	.	.	K	.	.	.	.	.	.	.	D
747	BAM85394.1	130		.	.	.	.	.	.	.	.	.	.	.	.	.	.	.	.	.	.	.	.	.	.	.	.	.	.	.	.	.	.	.	.	.	.	.	.	.	K	.	.	.	.	.	.	.	D
748	BAM85447.1	130		.	.	.	.	.	.	.	.	.	.	.	.	.	.	.	.	.	.	.	.	.	.	.	.	.	.	.	.	.	.	.	.	.	.	.	.	.	K	.	.	.	.	.	.	.	D
749	BAM85387.1	130		.	.	.	.	.	.	.	.	.	.	.	.	.	.	.	.	.	.	.	.	.	.	.	.	.	.	.	.	.	.	.	.	.	.	.	.	.	K	.	.	.	.	.	.	.	D
750	AFM28874.1	106		.	.	.	.	.	.	.	.	.	.	.	.	.	.	.	.	.	.	.	.	.	.	.	.	.	.	.	.	.	.	.	.	.	.	.	.	.	.	.	.	.	.	E	.	.	D
751	BAV14291.1	130		.	.	.	.	.	.	.	.	.	.	.	.	.	.	.	.	.	.	.	.	.	.	.	.	.	.	.	.	.	.	.	.	.	.	.	.	.	K	.	.	.	.	.	.	.	D
752	BAM85437.1	130		.	.	.	.	.	.	.	.	.	.	.	.	.	.	.	.	.	.	.	.	.	.	.	.	.	.	.	.	.	.	.	.	.	.	.	.	.	K	.	.	.	.	.	.	.	D
753	ACB87772.1	130		.	.	.	.	.	.	.	.	.	.	.	.	.	.	.	.	.	.	.	.	.	.	.	.	.	.	.	.	.	.	.	.	.	.	.	.	.	K	.	.	.	.	.	.	.	D
754	ACA24146.1	120		.	.	.	.	.	.	.	.	.	.	.	.	.	.	.	.	.	.	.	.	.	.	.	.	.	.	.	.	.	.	.	.	.	.	.	.	.	K	.	.	.	.	.	.	.	D
755	AFM28544.1	106		.	.	.	.	.	.	.	.	.	.	.	.	.	.	.	.	.	.	.	.	.	.	.	.	.	.	.	.	.	.	.	.	K	.	.	.	.	.	.	.	.	.	E	.	.	D
756	AAG50135.1	130		.	.	.	.	.	.	.	.	.	.	.	.	.	.	.	.	.	.	.	.	.	.	.	.	.	.	.	.	.	.	.	.	K	.	.	.	.	.	.	.	.	.	E	.	.	D
757	SOV80263.1	130		.	.	.	.	.	.	.	.	.	.	.	.	.	.	V	.	.	.	.	.	.	.	.	.	.	.	.	.	.	.	.	.	.	.	.	.	.	.	.	.	.	.	.	.	.	D
758	ANS58303.1	130		.	.	.	.	.	.	.	.	.	.	.	.	.	.	.	.	.	.	.	.	.	.	.	.	.	.	.	.	.	.	.	.	.	.	.	.	.	K	.	.	.	.	.	.	.	D
759	BAM85385.1	130		.	.	.	.	.	.	.	.	.	.	.	.	.	.	.	.	.	.	.	.	.	.	.	.	.	.	.	.	.	.	.	.	.	.	.	.	.	K	.	.	.	.	.	.	.	D
760	ANS58305.1	130		.	.	.	.	.	.	.	.	.	.	.	.	.	.	.	.	.	.	.	.	.	.	.	.	.	.	.	.	.	.	.	.	.	.	.	.	.	.	.	.	.	.	.	K	.	D
761	CAB97198.1	122		.	.	.	.	.	.	.	.	.	.	.	.	.	.	.	.	.	.	.	.	.	.	.	.	.	.	.	X	.	.	.	.	K	.	.	.	.	.	.	.	.	.	E	.	.	D
762	BAN59398.1	130		.	.	.	.	.	.	.	.	.	.	.	.	.	.	.	.	.	.	.	.	.	.	.	.	.	.	.	.	.	.	.	.	.	.	.	.	.	K	.	.	.	.	.	.	.	D
763	AFM28724.1	106		.	.	.	.	.	.	.	.	.	.	.	.	.	.	.	.	.	.	.	.	.	.	.	.	.	.	.	.	.	.	.	.	K	.	.	.	.	.	.	.	.	.	E	.	.	D
764	USU92732.1	130		.	.	.	.	.	.	.	.	.	.	.	.	.	.	.	.	.	.	.	.	.	.	.	.	.	.	.	.	.	.	.	.	K	.	.	.	.	.	.	.	.	.	E	.	.	D
765	AFM28659.1	106		.	.	.	.	.	.	.	.	.	.	.	.	.	.	.	.	.	.	.	.	.	.	.	.	.	.	.	.	.	.	.	.	.	.	.	.	.	K	.	.	.	.	E	.	.	D
766	UIH11183.1	130		.	.	.	.	.	.	.	.	.	.	.	.	.	.	.	.	.	.	.	.	.	.	.	.	.	.	.	.	.	.	.	.	.	.	.	.	.	.	.	.	.	.	.	.	.	D
767	BAM85395.1	130		.	.	.	.	.	.	.	.	.	.	.	.	.	.	.	.	.	.	.	.	.	.	.	.	.	.	.	.	.	.	.	.	.	.	.	.	.	K	.	.	.	.	.	.	.	D
768	ACR49762.1	117		.	.	.	.	.	.	.	.	.	.	.	.	.	.	.	.	.	.	.	.	.	.	.	.	.	.	.	.	.	.	.	.	K	.	.	.	.	.	.	.	.	.	E	.	.	D
769	AFM28858.1	106		.	.	.	.	.	.	.	.	.	.	.	.	.	.	.	.	.	.	.	.	.	.	.	.	.	.	.	.	.	.	.	.	K	.	.	.	.	.	.	.	.	.	E	.	.	D
770	BAM85370.1	130		.	.	.	.	.	.	.	.	.	.	.	.	.	.	.	.	.	.	.	.	.	.	.	.	.	.	.	.	.	.	.	.	.	.	.	.	.	K	.	.	.	.	.	.	.	D
771	CDO65136.1	130		.	.	.	.	.	.	.	.	.	.	.	.	.	.	V	.	.	.	.	.	.	.	.	.	.	.	.	.	.	.	.	.	.	.	.	.	.	.	.	.	.	.	.	.	.	D
772	XP_012763735.2	130		.	.	.	.	.	.	.	.	.	.	.	.	.	.	V	.	.	.	.	.	.	.	.	.	.	.	.	.	.	.	.	.	.	.	.	.	.	.	.	.	.	.	.	.	.	D
773	ABV02572.1	97		.	.	.	.	.	.	.	.	.	.	.	.	.	.	.	.	.	.	.	.	.	.	.	.	.	.	.	.	.	.	.	.	K	.	.	.	.	.	.	.	.	.	E	.	.	D
774	BAM85636.1	130		.	.	.	.	.	.	.	.	.	.	.	.	.	.	.	.	.	.	.	.	.	.	.	.	.	.	.	.	.	.	.	.	K	.	.	.	.	.	.	.	.	.	E	.	.	D
775	AIR08624.1	94		.	.	.	.	.	.	.	.	.	.	.	.	.	.	.	.	.	.	.	.	.	.	.	.	.	.	.	.	.	.	.	.	.	.	.	.	.	K	.	.	.	.	.	K	.	D
776	ACB87861.1	130		.	.	.	.	.	.	.	.	.	.	.	.	.	.	I	.	.	.	.	.	.	.	.	.	.	.	.	.	.	.	.	.	.	.	.	.	.	K	.	.	.	.	.	.	.	D
777	AXN69780.1	127		.	.	.	.	.	.	.	.	.	.	.	.	.	.	.	.	.	.	.	.	.	.	.	.	.	.	.	.	.	.	.	.	.	.	.	.	.	K	.	.	.	.	.	.	.	D
778	AFM28837.1	106		.	.	.	.	.	.	.	.	.	.	.	.	.	.	.	.	.	.	.	.	.	.	.	.	.	.	.	.	.	.	.	.	.	.	.	.	.	.	.	.	.	.	.	K	.	D
779	AMP83632.1	22		.	.	.	.	.	.	.	.	.	.	.	.	.	.	.	.	.	.	.	.	.	.	.	.	.	.	.	.	.	.	.	.	K	.	.	.	.	.	.	.	.	.	E	.	.	D
780	ACR49693.1	117		.	.	.	.	.	.	.	.	.	.	.	.	.	.	.	.	.	.	.	.	.	.	.	.	.	.	.	.	.	.	.	.	.	.	.	.	.	K	.	.	.	.	.	.	.	D
781	AMM75886.1	103		.	.	.	.	.	.	.	.	.	.	.	.	.	.	.	.	.	.	.	.	.	.	.	.	.	.	.	.	.	.	.	.	.	.	.	.	.	.	.	.	.	.	.	.	.	D
782	BAM85375.1	130		.	.	.	.	.	.	.	.	.	.	.	.	.	.	I	.	.	.	.	.	.	.	.	.	.	.	.	.	.	.	.	.	.	.	.	.	.	K	.	.	.	.	.	.	.	D
783	ANS58262.1	130		.	.	.	.	.	.	.	.	.	.	.	.	.	.	.	.	.	.	.	.	.	.	.	.	.	.	.	.	.	.	.	.	.	.	.	.	.	.	.	.	.	.	.	.	.	D
784	AHI17001.1	105		.	.	.	.	.	.	.	.	.	.	.	.	.	.	.	.	.	.	.	.	.	.	.	.	.	.	.	.	.	.	.	.	.	.	.	.	.	K	.	.	.	.	.	.	.	D
785	AAG50123.1	130		.	.	.	.	.	.	.	.	.	.	.	.	.	.	.	.	.	.	.	.	.	.	.	.	.	.	.	.	.	.	.	.	.	.	.	.	.	K	.	.	.	.	.	.	.	D
786	AAG50124.1	130		.	.	.	.	.	.	.	.	.	.	.	.	.	.	.	.	.	.	.	.	.	.	.	.	.	.	.	.	.	.	.	.	.	.	.	.	.	K	.	.	.	.	.	.	.	D
787	AAG50139.1	130		.	.	.	.	.	.	.	.	.	.	.	.	.	.	.	.	.	.	.	.	.	.	.	.	.	.	.	.	.	.	.	.	.	.	.	.	.	.	.	.	.	.	E	.	.	D
788	AAG50129.1	130		.	.	.	.	.	.	.	.	.	.	.	.	.	.	.	.	.	.	.	.	.	.	.	.	.	.	.	.	.	.	.	.	.	.	.	.	.	K	.	.	.	.	.	.	.	D
789	ACR49677.1	117		.	.	.	.	.	.	.	.	.	.	.	.	.	.	.	.	.	.	.	.	.	.	.	.	.	.	.	.	.	.	.	.	.	.	.	.	.	K	.	.	.	.	.	.	.	D
790	AMP83961.1	22		.	.	.	.	.	.	.	.	.	.	.	.	.	.	.	.	.	.	.	.	.	.	.	.	.	.	.	.	.	.	.	.	.	.	.	.	.	.	.	.	.	.	E	.	.	D
791	AXN69744.1	127		.	.	.	.	.	.	.	.	.	.	.	.	.	.	.	.	.	.	.	.	.	.	.	.	.	.	.	.	.	.	.	.	.	.	.	.	.	K	.	.	.	.	.	.	.	D
792	AMM75883.1	91		.	.	.	.	.	.	.	.	.	.	.	.	.	.	.	.	.	.	.	.	.	.	.	.	.	.	.	.	.	.	.	.	.	.	.	.	.	.	.	.	.	.	.	.	.	X
793	AMP83669.1	22		.	.	.	.	.	.	.	.	.	.	.	.	.	.	.	.	.	.	.	.	.	.	.	.	.	.	.	.	.	.	.	.	.	.	.	.	.	.	.	.	.	.	E	.	.	D
794	AAG50127.1	130		.	.	.	.	.	.	.	.	.	.	.	.	.	.	.	.	.	.	.	.	.	.	.	.	.	.	.	.	.	.	.	.	.	.	.	.	.	K	.	.	.	.	.	.	.	D
795	BCL11730.1	130		.	.	.	.	.	.	.	.	.	.	.	.	.	.	.	.	.	.	.	.	.	.	.	.	.	.	.	.	.	.	.	.	K	.	.	.	.	.	.	.	.	.	.	.	.	D
796	P50492.1	130		.	.	.	.	.	.	.	.	.	.	.	.	.	.	.	.	.	.	.	.	.	.	.	.	.	.	.	.	.	.	.	.	.	.	.	.	.	K	.	.	.	.	.	.	.	D
797	ABN12123.1	130		.	.	.	.	.	.	.	.	.	.	.	.	.	.	.	.	.	.	.	.	.	.	.	.	.	.	.	.	.	.	.	.	.	.	.	.	.	.	.	.	.	.	E	.	.	D
798	AFM28533.1	106		.	.	.	.	.	.	.	.	.	.	.	.	.	.	.	.	.	.	.	.	.	.	.	.	.	.	.	.	.	.	.	.	K	.	.	.	.	.	.	.	.	.	E	.	.	D
799	ACR49675.1	117		.	.	.	.	.	.	.	.	.	.	.	.	.	.	.	.	.	.	.	.	.	.	.	.	.	.	.	.	.	.	.	.	K	.	.	.	.	.	.	.	.	.	E	.	.	D
800	AFM28804.1	106		.	.	.	.	.	.	.	.	.	.	.	.	.	.	.	.	.	.	.	.	.	.	.	.	.	.	.	.	.	.	.	.	K	.	.	.	.	.	.	.	.	.	E	.	.	D
801	AFM28779.1	106		.	.	.	.	.	.	.	.	.	.	.	.	.	.	.	.	.	.	.	.	.	.	.	.	.	.	.	.	.	.	.	.	K	.	.	.	.	.	.	.	.	.	E	.	.	D
802	AFM28745.1	106		.	.	.	.	.	.	.	.	.	.	.	.	.	.	.	.	.	.	.	.	.	.	.	.	.	.	.	.	.	.	.	.	K	.	.	.	.	.	.	.	.	.	E	.	.	D
803	AFM28932.1	106		.	.	.	.	.	.	.	.	.	.	.	.	.	.	.	.	.	.	.	.	.	.	.	.	.	.	.	.	.	.	.	.	K	.	.	.	.	.	.	.	.	.	E	.	.	D
804	BAM85421.1	130		.	.	.	.	.	.	.	.	.	.	.	.	.	.	.	.	.	.	.	.	.	.	.	.	.	.	.	.	.	.	.	.	K	.	.	.	.	.	.	.	.	.	E	.	.	D
805	ANS58274.1	130		.	.	.	.	.	.	.	.	.	.	.	.	.	.	.	.	.	.	.	.	.	.	.	.	.	.	.	.	.	.	.	.	.	.	.	.	.	K	.	.	.	.	.	.	.	D
806	AFM28516.1	106		.	.	.	.	.	.	.	.	.	.	.	.	.	.	.	.	.	.	.	.	.	.	.	.	.	.	.	.	.	.	.	.	K	.	.	.	.	.	.	.	.	.	E	.	.	D
807	AFM28800.1	106		.	.	.	.	.	.	.	.	.	.	.	.	.	.	.	.	.	.	.	.	.	.	.	.	.	.	.	.	.	.	.	.	K	.	.	.	.	.	.	.	.	.	E	.	.	D
808	AFM28560.1	106		.	.	.	.	.	.	.	.	.	.	.	.	.	.	.	.	.	.	.	.	.	.	.	.	.	.	.	.	.	.	.	.	K	.	.	.	.	.	.	.	.	.	E	.	.	D
809	AAG50144.1	130		.	.	.	.	.	.	.	.	.	.	.	.	.	.	.	.	.	.	.	.	.	.	.	.	.	.	.	.	.	.	.	.	.	.	.	.	.	.	.	.	.	.	.	.	.	D
810	ACB87762.1	130		.	.	.	.	.	.	.	.	.	.	.	.	.	.	.	.	.	.	.	.	.	.	.	.	.	.	.	.	.	.	.	.	.	.	.	.	.	K	.	.	.	.	.	.	.	D
811	ACB87774.1	130		.	.	.	.	.	.	.	.	.	.	.	.	.	.	.	.	.	.	.	.	.	.	.	.	.	.	.	.	.	.	.	.	.	.	.	.	.	K	.	.	.	.	.	.	.	D
812	ACR49746.1	117		.	.	.	.	.	.	.	.	.	.	.	.	.	.	.	.	.	.	.	.	.	.	.	.	.	.	.	.	.	.	.	.	K	.	.	.	.	.	.	.	.	.	E	.	.	D
813	AFM28527.1	106		.	.	.	.	.	.	.	.	.	.	.	.	.	.	.	.	.	.	.	.	.	.	.	.	.	.	.	.	.	.	.	.	.	.	.	.	.	.	.	.	.	.	.	K	.	D
814	AFM28818.1	106		.	.	.	.	.	.	.	.	.	.	.	.	.	.	.	.	.	.	.	.	.	.	.	.	.	.	.	.	.	.	.	.	.	.	.	.	.	.	.	.	.	.	E	.	.	D
815	AFM28592.1	106		.	.	.	.	.	.	.	.	.	.	.	.	.	.	.	.	.	.	.	.	.	.	.	.	.	.	.	.	.	.	.	.	K	.	.	.	.	.	.	.	.	.	E	.	.	D
816	AFM28842.1	106		.	.	.	.	.	.	.	.	.	.	.	.	.	.	.	.	.	.	.	.	.	.	.	.	.	.	.	.	.	.	.	.	K	.	.	.	.	.	.	.	.	.	E	.	.	D
817	AFM28642.1	106		.	.	.	.	.	.	.	.	.	.	.	.	.	.	.	.	.	.	.	.	.	.	.	.	.	.	.	.	.	.	.	.	K	.	.	.	.	.	.	.	.	.	E	.	.	D
818	AMM75874.1	95		.	.	.	.	.	.	.	.	.	.	.	.	.	.	.	.	.	.	.	.	.	.	.	.	.	.	.	.	.	.	.	.	K	.	.	.	.	.	.	.	.	.	E	.	.	D
819	ACB87791.1	130		.	.	.	.	.	.	.	.	.	.	.	.	.	.	.	.	.	.	.	.	.	.	.	.	.	.	.	.	.	.	.	.	K	.	.	.	.	.	.	.	.	.	E	.	.	D
820	ACR49740.1	117		.	.	.	.	.	.	.	.	.	.	.	.	.	.	I	.	.	.	.	.	.	.	.	.	.	.	.	.	.	.	.	.	.	.	.	.	.	K	.	.	.	.	.	.	.	D
821	ACR49725.1	117		.	.	.	.	.	.	.	.	.	.	.	.	.	.	.	.	.	.	.	.	.	.	.	.	.	.	.	.	.	.	.	.	K	.	.	.	.	.	.	.	.	.	E	.	.	D
822	AMM75891.1	40		.	.	.	.	.	.	.	.	.	.	.	.	.	.	.	.	.	.	.	.	.	.	.	.	.	.	.	.	.	.	.	.	.	.	.	.	.	.	.	.	.	.	.	.	.	D
823	ACB87809.1	130		.	.	.	.	.	.	.	.	.	.	.	.	.	.	.	.	.	.	.	.	.	.	.	.	.	.	.	.	.	.	.	.	K	.	.	.	.	.	.	.	.	.	E	.	.	D
824	ACB87833.1	130		.	.	.	.	.	.	.	.	.	.	.	.	.	.	.	.	.	.	.	.	.	.	.	.	.	.	.	.	.	.	.	.	.	.	.	.	.	.	.	.	.	.	.	.	.	D
825	AFM28636.1	106		.	.	.	.	.	.	.	.	.	.	.	.	.	.	.	.	.	.	.	.	.	.	.	.	.	.	.	.	.	.	.	.	.	.	.	.	.	.	.	.	.	.	.	K	.	D
826	BCL11720.1	130		.	.	.	.	.	.	.	.	.	.	.	.	.	.	.	.	.	.	.	.	.	.	.	.	.	.	.	.	.	.	.	.	K	.	.	.	.	.	.	.	.	.	E	.	.	D
827	ACR49712.1	117		.	.	.	.	.	.	.	.	.	.	.	.	.	.	.	.	.	.	.	.	.	.	.	.	.	.	.	.	.	.	.	.	K	.	.	.	.	.	.	.	.	.	E	.	.	D
828	BAV14255.1	130		.	.	.	.	.	.	.	.	.	.	.	.	.	.	.	.	.	.	.	.	.	.	.	.	.	.	.	.	.	.	.	.	K	.	.	.	.	K	.	.	.	.	.	.	.	D
829	ACB87890.1	130		.	.	.	.	.	.	.	.	.	.	.	.	.	.	.	.	.	.	.	.	.	.	.	.	.	.	.	.	.	.	.	.	.	.	.	.	.	.	.	.	.	.	E	.	.	D
830	BAM85571.1	130		.	.	.	.	.	.	.	.	.	.	.	.	.	.	.	.	.	.	.	.	.	.	.	.	.	.	.	.	.	.	.	.	.	.	.	.	.	K	.	.	.	.	.	K	.	D
831	BAM85608.1	130		.	.	.	.	.	.	.	.	.	.	.	.	.	.	.	.	.	.	.	.	.	.	.	.	.	.	.	.	.	.	.	.	.	.	.	.	.	K	.	.	.	.	.	K	.	D
832	ANS58312.1	130		.	.	.	.	.	.	.	.	.	.	.	.	.	.	.	.	.	.	.	.	.	.	.	.	.	.	.	.	.	.	.	.	K	.	.	.	.	.	.	.	.	.	E	.	.	D
833	BCL11750.1	130		.	.	.	.	.	.	.	.	.	.	.	.	.	.	.	.	.	.	.	.	.	.	.	.	.	.	.	.	.	.	.	.	.	.	.	.	.	.	.	.	.	.	.	.	.	D
834	ACB87891.1	130		.	.	.	.	.	.	.	.	.	.	.	.	.	.	.	.	.	.	.	.	.	.	.	.	.	.	.	.	.	.	.	.	.	.	.	.	.	K	.	.	.	.	.	K	.	D
835	AFM28569.1	106		.	.	.	.	.	.	.	.	.	.	.	.	.	.	.	.	.	.	.	.	.	.	.	.	.	.	.	.	.	.	.	.	.	.	.	.	.	.	.	.	.	.	E	.	.	D
836	ACB87766.1	130		.	.	.	.	.	.	.	.	.	.	.	.	.	.	I	.	.	.	.	.	.	.	.	.	.	.	.	.	.	.	.	.	.	.	.	.	.	K	.	.	.	.	.	.	.	D
837	BAM85665.1	130		.	.	.	.	.	.	.	.	.	.	.	.	.	.	.	.	.	.	.	.	.	.	.	.	.	.	.	.	.	.	.	.	.	.	.	.	.	K	.	.	.	.	.	K	.	D
838	BAM85711.1	130		.	.	.	.	.	.	.	.	.	.	.	.	.	.	.	.	.	.	.	.	.	.	.	.	.	.	.	.	.	.	.	.	.	.	.	.	.	K	.	.	.	.	.	K	.	D
839	AFM28962.1	106		.	.	.	.	.	.	.	.	.	.	.	.	.	.	.	.	.	.	.	.	.	.	.	.	.	.	.	.	.	.	.	.	.	.	.	.	.	.	.	.	.	.	.	.	.	D
840	AAG50138.1	130		.	.	.	.	.	.	.	.	.	.	.	.	.	.	.	.	.	.	.	.	.	.	.	.	.	.	.	.	.	.	.	.	.	.	.	.	.	K	.	.	.	.	.	.	.	D
841	AHI16992.1	105		.	.	.	.	.	.	.	.	.	.	.	.	.	.	.	.	.	.	.	.	.	.	.	.	.	.	.	.	.	.	.	.	.	.	.	.	.	K	.	.	.	.	.	.	.	D
842	BCL11733.1	130		.	.	.	.	.	.	.	.	.	.	.	.	.	.	.	.	.	.	.	.	.	.	.	.	.	.	.	.	.	.	.	.	.	.	.	.	.	.	.	.	.	.	.	.	.	D
843	BAV14258.1	130		.	.	.	.	.	.	.	.	.	.	.	.	.	.	.	.	.	.	.	.	.	.	.	.	.	.	.	.	.	.	.	.	.	.	.	.	.	.	.	.	.	.	.	K	.	D
844	AFM28845.1	106		.	.	.	.	.	.	.	.	.	.	.	.	.	.	.	.	.	.	.	.	.	.	.	.	.	.	.	.	.	.	.	.	K	.	.	.	.	.	.	.	.	.	E	.	.	D
845	BAV14276.1	130		.	.	.	.	.	.	.	.	.	.	.	.	.	.	.	.	.	.	.	.	.	.	.	.	.	.	.	.	.	.	.	.	.	.	.	.	.	.	.	.	.	.	.	K	.	D
846	BAV14278.1	130		.	.	.	.	.	.	.	.	.	.	.	.	.	.	.	.	.	.	.	.	.	.	.	.	.	.	.	.	.	.	.	.	.	.	.	.	.	.	.	.	.	.	E	.	.	D
847	ACR49734.1	117		.	.	.	.	.	.	.	.	.	.	.	.	.	.	.	.	.	.	.	.	.	.	.	.	.	.	.	.	.	.	.	.	K	.	.	.	.	.	.	.	.	.	E	.	.	D
848	AHI17048.1	105		.	.	.	.	.	.	.	.	.	.	.	.	.	.	.	.	.	.	.	.	.	.	.	.	.	.	.	.	.	.	.	.	.	.	.	.	.	K	.	.	.	.	.	.	.	D
849	BAV14266.1	130		.	.	.	.	.	.	.	.	.	.	.	.	.	.	.	.	.	.	.	.	.	.	.	.	.	.	.	.	.	.	.	.	.	.	.	.	.	.	.	.	.	.	E	.	.	D
850	AFM28687.1	106		.	.	.	.	.	.	.	.	.	.	.	.	.	.	.	.	.	.	.	.	.	.	.	.	.	.	.	.	.	.	.	.	.	.	.	.	.	.	.	.	.	.	E	.	.	D
851	BCL11764.1	130		.	.	.	.	.	.	.	.	.	.	.	.	.	.	.	.	.	.	.	.	.	.	.	.	.	.	.	.	.	.	.	.	.	.	.	.	.	.	.	.	.	.	.	K	.	D
852	BCL11725.1	130		.	.	.	.	.	.	.	.	.	.	.	.	.	.	.	.	.	.	.	.	.	.	.	.	.	.	.	.	.	.	.	.	.	.	.	.	.	.	.	.	.	.	E	.	.	D
853	AFM28521.1	106		.	.	.	.	.	.	.	.	.	.	.	.	.	.	.	.	.	.	.	.	.	.	.	.	.	.	.	.	.	.	.	.	.	.	.	.	.	.	.	.	.	.	E	.	.	D
854	AFM28743.1	106		.	.	.	.	.	.	.	.	.	.	.	.	.	.	.	.	.	.	.	.	.	.	.	.	.	.	.	.	.	.	.	.	K	.	.	.	.	.	.	.	.	.	E	.	.	D
855	AFM28698.1	106		.	.	.	.	.	.	.	.	.	.	.	.	.	.	.	.	.	.	.	.	.	.	.	.	.	.	.	.	.	.	.	.	.	.	.	.	.	.	.	.	.	.	E	.	.	D
856	AFM28778.1	106		.	.	.	.	.	.	.	.	.	.	.	.	.	.	.	.	.	.	.	.	.	.	.	.	.	.	.	.	.	.	.	.	.	.	.	.	.	.	.	.	.	.	E	.	.	D
857	BAV14275.1	130		.	.	.	.	.	.	.	.	.	.	.	.	.	.	.	.	.	.	.	.	.	.	.	.	.	.	.	.	.	.	.	.	.	.	.	.	.	.	.	.	.	.	.	K	.	D
858	AFM28930.1	106		.	.	.	.	.	.	.	.	.	.	.	.	.	.	.	.	.	.	.	.	.	.	.	.	.	.	.	.	.	.	.	.	.	.	.	.	.	.	.	.	.	.	E	.	.	D
859	AAG50128.1	130		.	.	.	.	.	.	.	.	.	.	.	.	.	.	.	.	.	.	.	.	.	.	.	.	.	.	.	.	.	.	.	.	.	.	.	.	.	K	.	.	.	.	.	.	.	D
860	AFM28618.1	106		.	.	.	.	.	.	.	.	.	.	.	.	.	.	.	.	.	.	.	.	.	.	.	.	.	.	.	.	.	.	.	.	.	.	.	.	.	.	.	.	.	.	E	.	.	D
861	AGL76296.1	75		.	.	.	.	.	.	.	.	.	.	.	.	.	.	.	.	.	.	.	.	.	.	.	.	.	.	.	.	.	.	.	.	.	.	.	.	.	K	.	.	.	.	.	.	.	D
862	BAM85378.1	130		.	.	.	.	.	.	.	.	.	.	.	.	.	.	.	.	.	.	.	.	.	.	.	.	.	.	.	.	.	.	.	.	.	.	.	.	.	K	.	.	.	.	.	.	.	D
863	BAM85545.1	130		.	.	.	.	.	.	.	.	.	.	.	.	.	.	.	.	.	.	.	.	.	.	.	.	.	.	.	.	.	.	.	.	.	.	.	.	.	.	.	.	.	.	E	K	.	D
864	ACB87803.1	130		.	.	.	.	.	.	.	.	.	.	.	.	.	.	.	.	.	.	.	.	.	.	.	.	.	.	.	.	.	.	.	.	.	.	.	.	.	K	.	.	.	.	.	.	.	D
865	BAM85412.1	130		.	.	.	.	.	.	.	.	.	.	.	.	.	.	.	.	.	.	.	.	.	.	.	.	.	.	.	.	.	.	.	.	.	.	.	.	.	.	.	.	.	.	E	.	.	D
866	AIR08626.1	94		.	.	.	.	.	.	.	.	.	.	.	.	.	.	.	.	.	.	.	.	.	.	.	.	.	.	.	.	.	.	.	.	.	.	.	.	.	K	.	.	.	.	.	K	.	D
867	BAM85620.1	130		.	.	.	.	.	.	.	.	.	.	.	.	.	.	.	.	.	.	.	.	.	.	.	.	.	.	.	.	.	.	.	.	K	.	.	.	.	.	.	.	.	.	E	.	.	D
868	AMM75858.1	30		.	.	.	.	.	.	.	.	.	.	.	.	.	.	.	.	.	.	.	.	.	.	.	.	.	.	.	.	.	.	.	.	.	.	.	.	.	.	.	.	.	.	X	.	.	D
869	ACB87821.1	130		.	.	.	.	.	.	.	.	.	.	.	.	.	.	.	.	.	.	.	.	.	.	.	.	.	.	.	.	.	.	.	.	K	.	.	.	.	.	.	.	.	.	E	.	.	D
870	ACB87840.1	130		.	.	.	.	.	.	.	.	.	.	.	.	.	.	.	.	.	.	.	.	.	.	.	.	.	.	.	.	.	.	.	.	K	.	.	.	.	.	.	.	.	.	E	.	.	D
871	AGL76287.1	75		.	.	.	.	.	.	.	.	.	.	.	.	.	.	.	.	.	.	.	.	.	.	.	.	.	.	.	.	.	.	.	.	K	.	.	.	.	.	.	.	.	.	E	.	.	D
872	BCL11787.1	130		.	.	.	.	.	.	.	.	.	.	.	.	.	.	.	.	.	.	.	.	.	.	.	.	.	.	.	.	.	.	.	.	.	.	.	.	.	.	.	.	.	.	E	.	.	D
873	AFM28988.1	106		.	.	.	.	.	.	.	.	.	.	.	.	.	.	.	.	.	.	.	.	.	.	.	.	.	.	.	.	.	.	.	.	.	.	.	.	.	K	.	.	.	.	.	.	.	D
874	BAV14293.1	130		.	.	.	.	.	.	.	.	.	.	.	.	.	.	.	.	.	.	.	.	.	.	.	.	.	.	.	.	.	.	.	.	.	.	.	.	.	.	.	.	.	.	E	.	.	D
875	ACR49738.1	117		.	.	.	.	.	.	.	.	.	.	.	.	.	.	.	.	.	.	.	.	.	.	.	.	.	.	.	.	.	.	.	.	.	.	.	.	.	.	.	.	.	.	E	.	.	D
876	AFM28812.1	106		.	.	.	.	.	.	.	.	.	.	.	.	.	.	.	.	.	.	.	.	.	.	.	.	.	.	.	.	.	.	.	.	K	.	.	.	.	.	.	.	.	.	E	.	.	D
877	AFM28870.1	106		.	.	.	.	.	.	.	.	.	.	.	.	.	.	.	.	.	.	.	.	.	.	.	.	.	.	.	.	.	.	.	.	K	.	.	.	.	.	.	.	.	.	E	.	.	D
878	AMM75863.1	41		.	.	.	.	.	.	.	.	.	.	.	.	.	.	.	.	.	.	.	.	.	.	.	.	.	.	.	.	.	.	.	.	K	.	.	.	.	.	.	.	.	.	E	.	.	D
879	ANS58270.1	130		.	.	.	.	.	.	.	.	.	.	.	.	.	.	.	.	.	.	.	.	.	.	.	.	.	.	.	.	.	.	.	.	.	.	.	.	.	K	.	.	.	.	.	.	.	D
880	ACR49721.1	117		.	.	.	.	.	.	.	.	.	.	.	.	.	.	.	.	.	.	.	.	.	.	.	.	.	.	.	.	.	.	.	.	K	.	.	.	.	.	.	.	.	.	E	.	.	D
881	AFM28641.1	106		.	.	.	.	.	.	.	.	.	.	.	.	.	.	.	.	.	.	.	.	.	.	.	.	.	.	.	.	.	.	.	.	K	.	.	.	.	.	.	.	.	.	E	.	.	D
882	AFM28836.1	106		.	.	.	.	.	.	.	.	.	.	.	.	.	.	.	.	.	.	.	.	.	.	.	.	.	.	.	.	.	.	.	.	K	.	.	.	.	.	.	.	.	.	E	.	.	D
883	AFM28787.1	106		.	.	.	.	.	.	.	.	.	.	.	.	.	.	.	.	.	.	.	.	.	.	.	.	.	.	.	.	.	.	.	.	K	.	.	.	.	.	.	.	.	.	E	.	.	D
884	ACR49657.1	117		.	.	.	.	.	.	.	.	.	.	.	.	.	.	.	.	.	.	.	.	.	.	.	.	.	.	.	.	.	.	.	.	K	.	.	.	.	.	.	.	.	.	E	.	.	D
885	ACB87850.1	130		.	.	.	.	.	.	.	.	.	.	.	.	.	.	.	.	.	.	.	.	.	.	.	.	.	.	.	.	.	.	.	.	.	.	.	.	.	.	.	.	.	.	E	.	.	D
886	ACB87888.1	130		.	.	.	.	.	.	.	.	.	.	.	.	.	.	.	.	.	.	.	.	.	.	.	.	.	.	.	.	.	.	.	.	.	.	.	.	.	K	.	.	.	.	.	.	.	D
887	ACR49698.1	117		.	.	.	.	.	.	.	.	.	.	.	.	.	.	.	.	.	.	.	.	.	.	.	.	.	.	.	.	.	.	.	.	K	.	.	.	.	.	.	.	.	.	E	.	.	D
888	AFM28658.1	106		.	.	.	.	.	.	.	.	.	.	.	.	.	.	.	.	.	.	.	.	.	.	.	.	.	.	.	.	.	.	.	.	K	.	.	.	.	.	.	.	.	.	E	.	.	D
889	AFM28634.1	106		.	.	.	.	.	.	.	.	.	.	.	.	.	.	.	.	.	.	.	.	.	.	.	.	.	.	.	.	.	.	.	.	K	.	.	.	.	.	.	.	.	.	E	.	.	D
890	BCL11759.1	130		.	.	.	.	.	.	.	.	.	.	.	.	.	.	.	.	.	.	.	.	.	.	.	.	.	.	.	.	.	.	.	.	K	.	.	.	.	.	.	.	.	.	E	.	.	D
891	ACR49658.1	117		.	.	.	.	.	.	.	.	.	.	.	.	.	.	.	.	.	.	.	.	.	.	.	.	.	.	.	.	.	.	.	.	K	.	.	.	.	.	.	.	.	.	E	.	.	D
892	AFM28577.1	106		.	.	.	.	.	.	.	.	.	.	.	.	.	.	.	.	.	.	.	.	.	.	.	.	.	.	.	.	.	.	.	.	K	.	.	.	.	.	.	.	.	.	E	.	.	D
893	BAV14285.1	130		.	.	.	.	.	.	.	.	.	.	.	.	.	.	.	.	.	.	.	.	.	.	.	.	.	.	.	.	.	.	.	.	K	.	.	.	.	.	.	.	.	.	E	.	.	D
894	AIR08620.1	94		.	.	.	.	.	.	.	.	.	.	.	.	.	.	.	.	.	.	.	.	.	.	.	.	.	.	.	.	.	.	.	.	.	.	.	.	.	K	.	.	.	.	.	.	.	D
895	AMM75846.1	48		.	.	.	.	.	.	.	.	.	.	.	.	.	.	.	.	.	.	.	.	.	.	.	.	.	.	.	.	.	.	.	.	.	.	.	.	.	.	.	.	.	.	.	K	.	D
896	ACB87853.1	130		.	.	.	.	.	.	.	.	.	.	.	.	.	.	.	.	.	.	.	.	.	.	.	.	.	.	.	.	.	.	.	.	.	.	.	.	.	.	.	.	.	.	E	.	.	D
897	AHI17056.1	105		.	.	.	.	.	.	.	.	.	.	.	.	.	.	.	.	.	.	.	.	.	.	.	.	.	.	.	.	.	.	.	.	.	.	.	.	.	.	.	.	.	.	E	.	.	D
898	BAM85415.1	130		.	.	.	.	.	.	.	.	.	.	.	.	.	.	.	.	.	.	.	.	.	.	.	.	.	.	.	.	.	.	.	.	.	.	.	.	.	.	.	.	.	.	.	K	.	D
899	BAV14295.1	130		.	.	.	.	.	.	.	.	.	.	.	.	.	.	.	.	.	.	.	.	.	.	.	.	.	.	.	.	.	.	.	.	K	.	.	.	.	.	.	.	.	.	E	.	.	D
900	BAM85625.1	130		.	.	.	.	.	.	.	.	.	.	.	.	.	.	.	.	.	.	.	.	.	.	.	.	.	.	.	.	.	.	.	.	.	.	.	.	.	K	.	.	.	.	.	.	.	D
901	ACR49730.1	117		.	.	.	.	.	.	.	.	.	.	.	.	.	.	.	.	.	.	.	.	.	.	.	.	.	.	.	.	.	.	.	.	.	.	.	.	.	K	.	.	.	.	.	.	.	D
902	AMM75854.1	101		.	.	.	.	.	.	.	.	.	.	.	.	.	.	.	.	.	.	.	.	.	.	.	.	.	.	.	.	.	.	.	.	.	.	.	.	.	X	.	.	.	.	X	.	.	D
903	AAG50126.1	130		.	.	.	.	.	.	.	.	.	.	.	.	.	.	.	.	.	.	.	.	.	.	.	.	.	.	.	.	.	.	.	.	.	.	S	.	.	K	.	.	.	.	.	.	.	D
904	CAC05390.1	122		.	.	.	.	.	.	.	.	.	.	.	.	.	.	.	.	.	.	.	.	.	.	.	.	.	.	.	.	.	.	.	.	.	.	.	.	.	K	.	.	.	.	.	.	.	D
905	AFM28859.1	106		.	.	.	.	.	.	.	.	.	.	.	.	.	.	.	.	.	.	.	.	.	.	.	.	.	.	.	.	.	.	.	.	K	.	.	.	.	.	.	.	.	.	E	.	.	D
906	BAM85441.1	130		.	.	.	.	.	.	.	.	.	.	.	.	.	.	.	.	.	.	.	.	.	.	.	.	.	.	.	.	.	.	.	.	K	.	.	.	.	.	.	.	.	.	E	.	.	D
907	ACB87858.1	130		.	.	.	.	.	.	.	.	.	.	.	.	.	.	.	.	.	.	.	.	.	.	.	.	.	.	.	.	.	.	.	.	K	.	.	.	.	.	.	.	.	.	E	.	.	D
908	ACB87832.1	130		.	.	.	.	.	.	.	.	.	.	.	.	.	.	.	.	.	.	.	.	.	.	.	.	.	.	.	.	.	.	.	.	K	.	.	.	.	.	.	.	.	.	E	.	.	D
909	AFM28562.1	106		.	.	.	.	.	.	.	.	.	.	.	.	.	.	.	.	.	.	.	.	.	.	.	.	.	.	.	.	.	.	.	.	K	.	.	.	F	P	.	.	.	.	E	.	.	D
910	ACB87761.1	130		.	.	.	.	.	.	.	.	.	.	.	.	.	.	.	.	.	.	.	.	.	.	.	.	.	.	.	.	.	.	.	.	K	.	.	.	.	.	.	.	.	.	E	.	.	D
911	BAM85364.1	130		.	.	.	.	.	.	.	.	.	.	.	.	.	.	.	.	.	.	.	.	.	.	.	.	.	.	.	.	.	.	.	.	.	.	.	.	.	.	.	.	.	.	E	.	.	D
912	AFM28875.1	106		.	.	.	.	.	.	.	.	.	.	.	.	.	.	.	.	.	.	.	.	.	.	.	.	.	.	.	.	.	.	.	.	K	.	.	.	.	.	.	.	.	.	E	.	.	D
913	BCL11738.1	130		.	.	.	.	.	.	.	.	.	.	.	.	.	.	.	.	.	.	.	.	.	.	.	.	.	.	.	.	.	.	.	.	K	.	.	.	.	.	.	.	.	.	E	.	.	D
914	AXN69747.1	127		.	.	.	.	.	.	.	.	.	.	.	.	.	.	.	.	.	.	.	.	.	.	.	.	.	.	.	.	.	.	.	.	.	.	.	.	.	K	.	.	.	.	.	.	.	D
915	AFM28883.1	106		.	.	.	.	.	.	.	.	.	.	.	.	.	.	.	.	.	.	.	.	.	.	.	.	.	.	.	.	.	.	.	.	K	.	.	.	.	.	.	.	.	.	.	K	.	D
916	BCL11760.1	130		.	.	.	.	.	.	.	.	.	.	.	.	.	.	.	.	.	.	.	.	.	.	.	.	.	.	.	.	.	.	.	.	K	.	.	.	.	.	.	.	.	.	E	.	.	D
917	AFM28869.1	106		.	.	.	.	.	.	.	.	.	.	.	.	.	.	.	.	.	.	.	.	.	.	.	.	.	.	.	.	.	.	.	.	.	.	.	.	.	.	.	.	.	.	.	K	.	D
918	ACR49694.1	117		.	.	.	.	.	.	.	.	.	.	.	.	.	.	.	.	.	.	.	.	.	.	.	.	.	.	.	.	.	.	.	.	.	.	.	.	.	.	.	.	.	.	E	.	.	D
919	AAC47109.1	118		.	.	.	.	.	.	.	.	.	.	.	.	.	.	.	.	.	.	.	.	.	.	.	.	.	.	.	.	.	.	.	.	.	.	.	.	.	K	.	.	.	.	.	.	.	D
920	AFM28872.1	124		.	.	.	.	.	.	.	.	.	.	.	.	.	.	.	.	.	.	.	.	.	.	.	.	.	.	.	.	.	.	.	.	K	.	.	.	.	.	.	.	.	.	E	.	.	D
921	AAC47106.1	130		.	.	.	.	.	.	.	.	.	.	.	.	.	.	.	.	.	.	.	.	.	.	.	.	.	.	.	.	.	.	.	.	.	.	.	.	.	K	.	.	.	.	.	.	.	D
922	BAV14248.1	130		.	.	.	.	.	.	.	.	.	.	.	.	.	.	.	.	.	.	.	.	.	.	.	.	.	.	.	.	.	.	.	.	K	.	.	.	.	.	.	.	.	.	E	.	.	D
923	AFM28866.1	106		.	.	.	.	.	.	.	.	.	.	.	.	.	.	.	.	.	.	.	.	.	.	.	.	.	.	.	.	.	.	.	.	K	.	.	.	.	.	.	.	.	.	E	.	.	D
924	AXN69758.1	127		.	.	.	.	.	.	.	.	.	.	.	.	.	.	.	.	.	.	.	.	.	.	.	.	.	.	.	.	.	.	.	.	.	.	.	.	.	K	.	.	.	.	.	.	.	D
925	AMM75869.1	97		.	.	.	.	.	.	.	.	.	.	.	.	.	.	.	.	.	.	.	.	.	.	.	.	.	.	.	.	.	.	.	.	K	.	.	.	.	.	.	.	.	.	E	.	.	D
926	ANS58315.1	130		.	.	.	.	.	.	.	.	.	.	.	.	.	.	.	.	.	.	.	.	.	.	.	.	.	.	.	.	.	.	.	.	.	.	.	.	.	K	.	.	.	.	.	.	.	D
927	ACB87901.1	130		.	.	.	.	.	.	.	.	.	.	.	.	.	.	.	.	.	.	.	.	.	.	.	.	.	.	.	.	.	.	.	.	.	.	.	.	.	K	.	.	.	.	.	.	.	D
928	BAM85422.1	130		.	.	.	.	.	.	.	.	.	.	.	.	.	.	.	.	.	.	.	.	.	.	.	.	.	.	.	.	.	.	.	.	.	.	.	.	.	.	.	.	.	.	E	.	.	D
929	EUT83566.1	130		.	.	.	.	.	.	.	.	.	.	.	.	.	.	.	.	.	.	.	.	.	.	.	.	.	.	.	.	.	.	.	.	.	.	.	.	.	.	.	.	.	.	.	K	.	D
930	BAM85573.1	130		.	.	.	.	.	.	.	.	.	.	.	.	.	.	.	.	.	.	.	.	.	.	.	.	.	.	.	.	.	.	.	.	.	.	.	.	.	K	.	.	.	.	.	.	.	D
931	P50490.1	130		.	.	.	.	.	.	.	.	.	.	.	.	.	.	.	.	.	.	.	.	.	.	.	.	.	.	.	.	.	.	.	.	.	.	.	.	.	K	.	.	.	.	.	.	.	D
932	ANS58283.1	130		.	.	.	.	.	.	.	.	.	.	.	.	.	.	.	.	.	.	.	.	.	.	.	.	.	.	.	.	.	.	.	.	.	.	.	.	.	K	.	.	.	.	.	.	.	D
933	BAM85653.1	130		.	.	.	.	.	.	.	.	.	.	.	.	.	.	.	.	.	.	.	.	.	.	.	.	.	.	.	.	.	.	.	.	.	.	.	.	.	.	.	.	.	.	.	K	.	D
934	USU92733.1	130		.	.	.	.	.	.	.	.	.	.	.	.	.	.	.	.	.	.	.	.	.	.	.	.	.	.	.	.	.	.	.	.	.	.	.	.	.	K	.	.	.	.	.	.	.	D
935	AAG50136.1	130		.	.	.	.	.	.	.	.	.	.	.	.	.	.	.	.	.	.	.	.	.	.	.	.	.	.	.	.	.	.	.	.	.	.	.	.	.	K	.	.	.	.	.	.	.	D
936	AXN69756.1	127		.	.	.	.	.	.	.	.	.	.	.	.	.	.	.	.	.	.	.	.	.	.	.	.	.	.	.	.	.	.	.	.	.	.	.	.	.	K	.	.	.	.	.	.	.	D
937	ANS58275.1	130		.	.	.	.	.	.	.	.	.	.	.	.	.	.	.	.	.	.	.	.	.	.	.	.	.	.	.	.	.	.	.	.	.	.	.	.	.	K	.	.	.	.	.	.	.	D
938	BAM85602.1	130		.	.	.	.	.	.	.	.	.	.	.	.	.	.	.	.	.	.	.	.	.	.	.	.	.	.	.	.	.	.	.	.	.	.	.	.	.	.	.	.	.	.	.	K	.	D
939	BAV14259.1	130		.	.	.	.	.	.	.	.	.	.	.	.	.	.	.	.	.	.	.	.	.	.	.	.	.	.	.	.	.	.	.	.	.	.	.	.	.	K	.	.	.	.	.	.	.	D
940	AAD03790.1	130		.	.	.	.	.	.	.	.	.	.	.	.	.	.	.	.	.	.	.	.	.	.	.	.	.	.	.	.	.	.	.	.	.	.	.	.	.	K	.	.	.	.	.	.	.	D
941	AHI17002.1	105		.	.	.	.	.	.	.	.	.	.	.	.	.	.	.	.	.	.	.	.	.	.	.	.	.	.	.	.	.	.	.	.	.	.	.	.	.	.	.	.	.	.	E	.	.	D
942	BAV14272.1	130		.	.	.	.	.	.	.	.	.	.	.	.	.	.	.	.	.	.	.	.	.	.	.	.	.	.	.	.	.	.	.	.	K	.	.	.	.	.	.	.	.	.	E	.	.	D
943	BAV14252.1	130		.	.	.	.	.	.	.	.	.	.	.	.	.	.	.	.	.	.	.	.	.	.	.	.	.	.	.	.	.	.	.	.	.	.	.	.	.	.	.	.	.	.	E	.	.	D
944	AIR08625.1	94		.	.	.	.	.	.	.	.	.	.	.	.	.	.	.	.	.	.	.	.	.	.	.	.	.	.	.	.	.	.	.	.	.	.	.	.	.	K	.	.	.	.	.	.	.	D
945	ACB87768.1	130		.	.	.	.	.	.	.	.	.	.	.	.	.	.	.	.	.	.	.	.	.	.	.	.	.	.	.	.	.	.	.	.	.	.	.	.	.	.	.	.	.	.	E	.	.	D
946	ACB87896.1	130		.	.	.	.	.	.	.	.	.	.	.	.	.	.	.	.	.	.	.	.	.	.	.	.	.	.	.	.	.	.	.	.	.	.	.	.	.	.	.	.	.	.	E	.	.	D
947	ACR49733.1	117		.	.	.	.	.	.	.	.	.	.	.	.	.	.	.	.	.	.	.	.	.	.	.	.	.	.	.	.	.	.	.	.	K	.	.	.	.	.	.	.	.	.	E	.	.	D
948	AMM75870.1	98		.	.	.	.	.	.	.	.	.	.	.	.	.	.	.	.	.	.	.	.	.	.	.	.	.	.	.	.	.	.	.	.	.	.	.	.	.	.	.	.	.	.	.	K	.	D
949	AFM28853.1	106		.	.	.	.	.	.	.	.	.	.	.	.	.	.	.	.	.	.	.	.	.	.	.	.	.	.	.	.	.	.	.	.	.	.	.	.	.	.	.	.	.	.	.	K	.	D
950	AFM28591.1	106		.	.	.	.	.	.	.	.	.	.	.	.	.	.	.	.	.	.	.	.	.	A	.	.	.	.	.	.	.	.	.	.	K	.	.	.	.	.	.	.	.	.	E	.	.	D
951	AFM28725.1	106		.	.	.	.	.	.	.	.	.	.	.	.	.	.	.	.	.	.	.	.	.	.	.	.	.	.	.	.	.	.	.	.	.	.	.	.	.	.	.	.	.	.	.	K	.	D
952	AFM28762.1	106		.	.	.	.	.	.	.	.	.	.	.	.	.	.	.	.	.	.	.	.	.	.	.	.	.	.	.	.	.	.	.	.	.	.	.	.	.	.	.	.	.	.	.	K	.	D
953	AFM28903.1	106		.	.	.	.	.	.	.	.	.	.	.	.	.	.	.	.	.	.	.	.	.	.	.	.	.	.	.	.	.	.	.	.	.	.	.	.	.	.	.	.	.	.	.	K	.	D
954	AFM28637.1	106		.	.	.	.	.	.	.	.	.	.	.	.	.	.	.	.	.	.	.	.	.	.	.	.	.	.	.	.	.	.	.	.	.	.	.	.	.	.	.	.	.	.	.	K	.	D
955	AFM28969.1	106		.	.	.	.	.	.	.	.	.	.	.	.	.	.	.	.	.	.	.	.	.	.	.	.	.	.	.	.	.	.	.	.	.	.	.	.	.	.	.	.	.	.	.	K	.	D
956	AFM28670.1	106		.	.	.	.	.	.	.	.	.	.	.	.	.	.	.	.	.	.	.	.	.	.	.	.	.	.	.	.	.	.	.	.	.	.	.	.	.	.	.	.	.	.	.	K	.	D
957	AFM28979.1	106		.	.	.	.	.	.	.	.	.	.	.	.	.	.	.	.	.	.	.	.	.	.	.	.	.	.	.	.	.	.	.	.	.	.	.	.	.	.	.	.	.	.	.	K	.	D
958	AFM28887.1	106		.	.	.	.	.	.	.	.	.	.	.	.	.	.	.	.	.	.	.	.	.	.	.	.	.	.	.	.	.	.	.	.	.	.	.	.	.	.	.	.	.	.	.	K	.	D
959	AFM28889.1	106		.	.	.	.	.	.	.	.	.	.	.	.	.	.	.	.	.	.	.	.	.	.	.	.	.	.	.	.	.	.	.	.	.	.	.	.	.	.	.	.	.	.	.	K	.	D
960	AFM28518.1	106		.	.	.	.	.	.	.	.	.	.	.	.	.	.	.	.	.	.	.	.	.	.	.	.	.	.	.	.	.	.	.	.	.	.	.	.	.	.	.	.	.	.	.	K	.	D
961	AFM28958.1	106		.	.	.	.	.	.	.	.	.	.	.	.	.	.	.	.	.	.	.	.	.	.	.	.	.	.	.	.	.	.	.	.	.	.	.	.	.	.	.	.	.	.	.	K	.	D
962	AFM28840.1	106		.	.	.	.	.	.	.	.	.	.	.	.	.	.	.	.	.	.	.	.	.	.	.	.	.	.	.	.	.	.	.	.	.	.	.	.	.	.	.	.	.	.	.	K	.	D
963	AFM28607.1	106		.	.	.	.	.	.	.	.	.	.	.	.	.	.	.	.	.	.	.	.	.	.	.	.	.	.	.	.	.	.	.	.	.	.	.	.	.	K	.	.	.	.	.	.	.	D
964	AFM28727.1	106		.	.	.	.	.	.	.	.	.	.	.	.	.	.	.	.	.	.	.	.	.	.	.	.	.	.	.	.	.	.	.	.	.	.	.	.	.	.	.	.	.	.	.	K	.	D
965	BAM85365.1	130		.	.	.	.	.	.	.	.	.	.	.	.	.	.	.	.	.	.	.	.	.	.	.	.	.	.	.	.	.	.	.	.	K	.	.	.	.	.	.	.	.	.	E	.	.	D
966	ACB87851.1	130		.	.	.	.	.	.	.	.	.	.	.	.	.	.	.	.	.	.	.	.	.	.	.	.	.	.	.	.	.	.	.	.	K	.	.	.	.	.	.	.	.	.	E	.	.	D
967	AMM75868.1	99		.	.	.	.	.	.	.	.	.	.	.	.	.	.	.	.	.	.	.	.	.	.	.	.	.	.	.	.	.	.	.	.	.	.	.	.	.	.	.	.	.	.	.	K	.	D
968	ACB87839.1	130		.	.	.	.	.	.	.	.	.	.	.	.	.	.	.	.	.	.	.	.	.	.	.	.	.	.	.	.	.	.	.	.	K	.	.	.	.	.	.	.	.	.	E	.	.	D
969	BAM85396.1	130		.	.	.	.	.	.	.	.	.	.	.	.	.	.	.	.	.	.	.	.	.	.	.	.	.	.	.	.	.	.	.	.	K	.	.	.	.	.	.	.	.	.	E	.	.	D
970	ACB87846.1	130		.	.	.	.	.	.	.	.	.	.	.	.	.	.	.	.	.	.	.	.	.	.	.	.	.	.	.	.	.	.	.	.	K	.	.	.	.	.	.	.	.	.	E	.	.	D
971	AFM28767.1	106		.	.	.	.	.	.	.	.	.	.	.	.	.	.	.	.	.	.	.	.	.	.	.	.	.	.	.	.	.	.	.	.	.	.	.	.	.	K	.	.	.	.	.	.	.	D
972	ACR49670.1	117		.	.	.	.	.	.	.	.	.	.	.	.	.	.	.	.	.	.	.	.	.	.	.	.	.	.	.	.	.	.	.	.	.	.	.	.	.	.	.	.	.	.	.	K	.	D
973	AHI17036.1	105		.	.	.	.	.	.	.	.	.	.	.	.	.	.	.	.	.	.	.	.	.	.	.	.	.	.	.	.	.	.	.	.	.	.	.	.	.	.	.	.	.	.	E	.	.	D
974	BAV14286.1	130		.	.	.	.	.	.	.	.	.	.	.	.	.	.	.	.	.	.	.	.	.	.	.	.	.	.	.	.	.	.	.	.	K	.	.	.	.	.	.	.	.	.	E	.	.	D
975	ACR49689.1	117		.	.	.	.	.	.	.	.	.	.	.	.	.	.	.	.	.	.	.	.	.	.	.	.	.	.	.	.	.	.	.	.	.	.	.	.	.	.	.	.	.	.	.	K	.	D
976	BAM85446.1	130		.	.	.	.	.	.	.	.	.	.	.	.	.	.	.	.	.	.	.	.	.	.	.	.	.	.	.	.	.	.	.	.	K	.	.	.	.	.	.	.	.	.	E	.	.	D
977	BAM85404.1	130		.	.	.	.	.	.	.	.	.	.	.	.	.	.	.	.	.	.	.	.	.	.	.	.	.	.	.	.	.	.	.	.	K	.	.	.	.	.	.	.	.	.	E	.	.	D
978	ACR49720.1	117		.	.	.	.	.	.	.	.	.	.	.	.	.	.	.	.	.	.	.	.	.	.	.	.	.	.	.	.	.	.	.	.	.	.	.	.	.	.	.	.	.	.	.	K	.	D
979	AMM75838.1	103		.	.	.	.	.	.	.	.	.	.	.	.	.	.	.	.	.	.	.	.	.	.	.	.	.	.	.	.	.	.	.	.	.	.	.	.	.	.	.	.	.	.	E	.	.	D
980	BAV14242.1	130		.	.	.	.	.	.	.	.	.	.	.	.	.	.	.	.	.	.	.	.	.	.	.	.	.	.	.	.	.	.	.	.	K	.	.	.	.	.	.	.	.	.	E	.	.	D
981	CAB97191.1	122		.	.	.	.	.	.	.	.	.	.	.	.	.	.	.	.	.	.	.	.	.	.	.	.	.	.	.	.	.	.	.	.	.	.	.	.	.	.	.	.	.	.	.	K	.	D
982	ACB87898.1	130		.	.	.	.	.	.	.	.	.	.	.	.	.	.	.	.	.	.	.	.	.	.	.	.	.	.	.	.	.	.	.	.	.	.	.	.	.	K	.	.	.	.	.	.	.	D
983	BAM85418.1	130		.	.	.	.	.	.	.	.	.	.	.	.	.	.	.	.	.	.	.	.	.	.	.	.	.	.	.	.	.	.	.	.	.	.	.	.	.	.	.	.	.	.	.	K	.	D
984	BAM85359.1	130		.	.	.	.	.	.	.	.	.	.	.	.	.	.	.	.	.	.	.	.	.	.	.	.	.	.	.	.	.	.	.	.	.	.	.	.	.	.	.	.	.	.	.	K	.	D
985	AFM28549.1	106		.	.	.	.	.	.	.	.	.	.	.	.	.	.	.	.	.	.	.	.	.	.	.	.	.	.	.	.	.	.	.	.	.	.	.	.	.	K	.	.	.	.	.	.	.	D
986	AFM28542.1	106		.	.	.	.	.	.	.	.	.	.	.	.	.	.	.	.	.	.	.	.	.	.	.	.	.	.	.	.	.	.	.	.	K	.	.	.	.	.	.	.	.	.	E	.	.	D
987	BAV14299.1	130		.	.	.	.	.	.	.	.	.	.	.	.	.	.	.	.	.	.	.	.	.	.	.	.	.	.	.	.	.	.	.	.	.	.	.	.	.	.	.	.	.	.	.	K	.	D
988	AFM28823.1	106		.	.	.	.	.	.	.	.	.	.	.	.	.	.	.	.	.	.	.	.	.	.	.	.	.	.	.	.	.	.	.	.	K	.	.	.	.	.	.	.	.	.	E	.	.	D
989	AFM28931.1	106		.	.	.	.	.	.	.	.	.	.	.	.	.	.	.	.	.	.	.	.	.	.	.	.	.	.	.	.	.	.	.	.	.	.	.	.	.	.	.	.	.	.	.	K	.	D
990	CAB97196.1	122		.	.	.	.	.	.	.	.	.	.	.	.	.	.	.	.	.	.	.	.	.	.	.	.	X	.	.	.	.	.	.	.	K	.	.	.	.	.	.	.	.	.	E	.	.	D
991	AFM28809.1	106		.	.	.	.	.	.	.	.	.	.	.	.	.	.	.	.	.	.	.	.	.	.	.	.	.	.	.	.	.	.	.	.	K	.	.	.	.	.	.	.	.	.	E	.	.	D
992	BAM85381.1	130		.	.	.	.	.	.	.	.	.	.	.	.	.	.	.	.	.	.	.	.	.	.	.	.	.	.	.	.	.	.	.	.	.	.	.	.	.	.	.	.	.	.	E	.	.	D
993	BAV14270.1	130		.	.	.	.	.	.	.	.	.	.	.	.	.	.	.	.	.	.	.	.	.	.	.	.	.	.	.	.	.	.	.	.	.	.	.	.	.	.	.	.	.	.	E	.	.	D
994	BAM85626.1	130		.	.	.	.	.	.	.	.	.	.	.	.	.	.	.	.	.	.	.	.	.	.	.	.	.	.	.	.	.	.	.	.	.	.	.	.	.	.	.	.	.	.	E	.	.	D
995	ACR49661.1	117		.	.	.	.	.	.	.	.	.	.	.	.	.	.	.	.	.	.	.	.	.	.	.	.	.	.	.	.	.	.	.	.	.	.	.	.	.	.	.	.	.	.	.	K	.	D
996	ACB87758.1	130		.	.	.	.	.	.	.	.	.	.	.	.	.	.	.	.	.	.	.	.	.	.	.	.	.	.	.	.	.	.	.	.	.	.	.	.	.	.	.	.	.	.	E	.	.	D
997	ACR49669.1	117		.	.	.	.	.	.	.	.	.	.	.	.	.	.	.	.	.	.	.	.	.	.	.	.	.	.	.	.	.	.	.	.	.	.	.	.	.	.	.	.	.	.	.	K	.	D
998	ACR49717.1	117		.	.	.	.	.	.	.	.	.	.	.	.	.	.	.	.	.	.	.	.	.	.	.	.	.	.	.	.	.	.	.	.	.	.	.	.	.	.	.	.	.	.	.	K	.	D
999	BCL11710.1	130		.	.	.	.	.	.	.	.	.	.	.	.	.	.	.	.	.	.	.	.	.	.	.	.	.	.	.	.	.	.	.	.	.	.	.	.	.	.	.	.	.	.	E	.	.	D
1000	AMM75880.1	94		.	.	.	.	.	.	.	.	.	.	.	.	.	.	.	.	.	.	.	.	.	.	.	.	.	.	.	.	.	.	.	.	X	.	.	.	.	.	.	.	.	.	E	.	.	D
1001	ACB87824.1	130		.	.	.	.	.	.	.	.	.	.	.	.	.	.	.	.	.	.	.	.	.	.	.	.	.	.	.	.	.	.	.	.	.	.	.	.	.	.	.	.	.	.	.	K	.	D
1002	ACB87781.1	130		.	.	.	.	.	.	.	.	.	.	.	.	.	.	.	.	.	.	.	.	.	.	.	.	.	.	.	.	.	.	.	.	.	.	.	.	.	K	.	.	.	.	.	.	.	D
1003	ACB87785.1	130		.	.	.	.	.	.	.	.	.	.	.	.	.	.	.	.	.	.	.	.	.	.	.	.	.	.	.	.	.	.	.	.	.	.	.	.	.	K	.	.	.	.	.	.	.	D
1004	BAM85455.1	130		.	.	.	.	.	.	.	.	.	.	.	.	.	.	.	.	.	.	.	.	.	.	.	.	.	.	.	.	.	.	.	.	.	.	.	.	.	.	.	.	.	.	.	K	.	D
1005	ACB87795.1	130		.	.	.	.	.	.	.	.	.	.	.	.	.	.	.	.	.	.	.	.	.	.	.	.	.	.	.	.	.	.	.	.	.	.	.	.	.	K	.	.	.	.	.	.	.	D
1006	BAM85431.1	130		.	.	.	.	.	.	.	.	.	.	.	.	.	.	.	.	.	.	.	.	.	.	.	.	.	.	.	.	.	.	.	.	.	.	.	.	.	.	.	.	.	.	.	K	.	D
1007	ACB87827.1	130		.	.	.	.	.	.	.	.	.	.	.	.	.	.	.	.	.	.	.	.	.	.	.	.	.	.	.	.	.	.	.	.	.	.	.	.	.	.	.	.	.	.	.	K	.	D
1008	BAM85433.1	130		.	.	.	.	.	.	.	.	.	.	.	.	.	.	.	.	.	.	.	.	.	.	.	.	.	.	.	.	.	.	.	.	.	.	.	.	.	K	.	.	.	.	.	.	.	D
1009	BCL11771.1	130		.	.	.	.	.	.	.	.	.	.	.	.	.	.	.	.	.	.	.	.	.	.	.	.	.	.	.	.	.	.	.	.	.	.	.	.	.	.	.	.	.	.	.	K	.	D
1010	BCL11744.1	130		.	.	.	.	.	.	.	.	.	.	.	.	.	.	.	.	.	.	.	.	.	.	.	.	.	.	.	.	.	.	.	.	.	.	.	.	.	.	.	.	.	.	.	K	.	D
1011	AFM28898.1	106		.	.	.	.	.	.	.	.	.	.	.	.	.	.	.	.	.	.	.	.	.	.	.	.	.	.	.	.	.	.	.	.	.	.	.	.	.	.	.	.	.	.	.	K	.	D
1012	AFM28651.1	106		.	.	.	.	.	.	.	.	.	.	.	.	.	.	.	.	.	.	.	.	.	.	.	.	.	.	.	.	.	.	.	.	K	.	.	.	.	.	.	.	.	.	E	.	.	D
1013	AFM28528.1	106		.	.	.	.	.	.	.	.	.	.	.	.	.	.	.	.	.	.	.	.	.	.	.	.	.	.	.	.	.	.	.	.	K	.	.	.	.	.	.	.	.	.	E	.	.	D
1014	AFM28949.1	106		.	.	.	.	.	.	.	.	.	.	.	.	.	.	.	.	.	.	.	.	.	.	.	.	.	.	.	.	.	.	.	.	K	.	.	.	.	.	.	.	.	.	E	.	.	D
1015	AFM28548.1	106		.	.	.	.	.	.	.	.	.	.	.	.	.	.	.	.	.	.	.	.	.	.	.	.	.	.	.	.	.	.	.	.	.	.	.	.	.	.	.	.	.	.	.	K	.	D
1016	AFM28839.1	106		.	.	.	.	.	.	.	.	.	.	.	.	.	.	.	.	.	.	.	.	.	.	.	.	.	.	.	.	.	.	.	.	K	.	.	.	.	.	.	.	.	.	E	.	.	D
1017	AFM28819.1	106		.	.	.	.	.	.	.	.	.	.	.	.	.	.	.	.	.	.	.	.	.	.	.	.	.	.	.	.	.	.	.	.	.	.	.	.	.	.	.	.	.	.	.	K	.	D
1018	AFM28555.1	106		.	.	.	.	.	.	.	.	.	.	.	.	.	.	.	.	.	.	.	.	.	.	.	.	.	.	.	.	.	.	.	.	.	.	.	.	.	.	.	.	.	.	.	K	.	D
1019	AFM28619.1	106		.	.	.	.	.	.	.	.	.	.	.	.	.	.	.	.	.	.	.	.	.	.	.	.	.	.	.	.	.	.	.	.	.	.	.	.	.	.	.	.	.	.	.	K	.	D
1020	AFM28795.1	106		.	.	.	.	.	.	.	.	.	.	.	.	.	.	.	.	.	.	.	.	.	.	.	.	.	.	.	.	.	.	.	.	K	.	.	.	.	.	.	.	.	.	E	.	.	D
1021	CAB97188.1	122		.	.	.	.	.	.	.	.	.	.	.	.	.	.	.	.	.	.	.	.	.	.	.	.	.	.	.	.	.	.	.	.	.	.	.	.	.	.	.	.	.	.	.	K	.	D
1022	AFM28759.1	106		.	.	.	.	.	.	.	.	.	.	.	.	.	.	.	.	.	.	.	.	.	.	.	.	.	.	.	.	.	.	.	.	.	.	.	.	.	K	.	.	.	.	.	.	.	D
1023	AMM75881.1	101		.	.	.	.	.	.	.	.	.	.	.	.	.	.	.	.	.	.	.	.	.	.	.	.	.	.	.	.	.	.	.	.	.	.	.	.	.	.	.	.	.	.	.	K	.	D
1024	AMM75841.1	96		.	.	.	.	.	.	.	.	.	.	.	.	.	.	.	.	.	.	.	.	.	.	.	.	.	.	.	.	.	.	.	.	K	.	.	.	.	.	.	.	.	.	E	.	.	D
1025	BCL11721.1	130		.	.	.	.	.	.	.	.	.	.	.	.	.	.	.	.	.	.	.	.	.	.	.	.	.	.	.	.	.	.	.	.	K	.	.	.	.	.	.	.	.	.	E	.	.	D
1026	ACB87845.1	130		.	.	.	.	.	.	.	.	.	.	.	.	.	.	.	.	.	.	.	.	.	.	.	.	.	.	.	.	.	.	.	.	K	.	.	.	.	.	.	.	.	.	E	.	.	D
1027	BCL11780.1	130		.	.	.	.	.	.	.	.	.	.	.	.	.	.	.	.	.	.	.	.	.	.	.	.	.	.	.	.	.	.	.	.	.	.	.	.	.	.	.	.	.	.	.	K	.	D
1028	BAV14254.1	130		.	.	.	.	.	.	.	.	.	.	.	.	.	.	.	.	.	.	.	.	.	.	.	.	.	.	.	.	.	.	.	.	.	.	.	.	.	.	.	.	.	.	.	K	.	D
1029	CAB97180.1	122		.	.	.	.	.	.	.	.	.	.	.	.	.	.	.	.	.	.	.	.	.	.	.	.	.	.	.	.	.	.	.	.	K	.	.	.	.	.	.	.	.	.	E	.	.	D
1030	AMM75876.1	91		.	.	.	.	.	.	.	.	.	.	.	.	.	.	.	.	.	.	.	.	.	.	.	.	.	.	.	.	.	.	.	.	.	.	.	.	.	.	.	.	.	.	E	.	.	D
1031	ACR49708.1	117		.	.	.	.	.	.	.	.	.	.	.	.	.	.	.	.	.	.	.	.	.	.	.	.	.	.	.	.	.	.	.	.	.	.	.	.	.	.	.	.	.	.	.	K	.	D
1032	ACR49701.1	117		.	.	.	.	.	.	.	.	.	.	.	.	.	.	.	.	.	.	.	.	.	.	.	.	.	.	.	.	.	.	.	.	K	.	.	.	.	.	.	.	.	.	E	.	.	D
1033	ACR49743.1	117		.	.	.	.	.	.	.	.	.	.	.	.	.	.	.	.	.	.	.	.	.	.	.	.	.	.	.	.	.	.	.	.	.	.	.	.	.	.	.	.	.	.	.	K	.	D
1034	AMM75873.1	91		.	.	.	.	.	.	.	.	.	.	.	.	.	.	.	.	.	.	.	.	.	.	.	.	.	.	.	.	.	.	.	.	.	.	.	.	.	.	.	.	.	.	X	.	.	D
1035	BAV14243.1	130		.	.	.	.	.	.	.	.	.	.	.	.	.	.	.	.	.	.	.	.	.	.	.	.	.	.	.	.	.	.	.	.	K	.	.	.	.	.	.	.	.	.	E	.	.	D
1036	BCL11732.1	130		.	.	.	.	.	.	.	.	.	.	.	.	.	.	.	.	.	.	.	.	.	.	.	.	.	.	.	.	.	.	.	.	K	.	.	.	.	.	.	.	.	.	E	.	.	D
1037	BAV14268.1	130		.	.	.	.	.	.	.	.	.	.	.	.	.	.	.	.	.	.	.	.	.	.	.	.	.	.	.	.	.	.	.	.	K	.	.	.	.	.	.	.	.	.	E	.	.	D
1038	BAV14251.1	130		.	.	.	.	.	.	.	.	.	.	.	.	.	.	.	.	.	.	.	.	.	.	.	.	.	.	.	.	.	.	.	.	K	.	.	.	.	.	.	.	.	.	E	.	.	D
1039	BCL11789.1	130		.	.	.	.	.	.	.	.	.	.	.	.	.	.	.	.	.	.	.	.	.	.	.	.	.	.	.	.	.	.	.	.	K	.	.	.	.	.	.	.	.	.	E	.	.	D
1040	BCL11762.1	130		.	.	.	.	.	.	.	.	.	.	.	.	.	.	.	.	.	.	.	.	.	.	.	.	.	.	.	.	.	.	.	.	K	.	.	.	.	.	.	.	.	.	E	.	.	D
1041	ACB87849.1	130		.	.	.	.	.	.	.	.	.	.	.	.	.	.	.	.	.	.	.	.	.	.	.	.	.	.	.	.	.	.	.	.	.	.	.	.	.	.	.	.	.	.	.	K	.	D
1042	ACB87860.1	130		.	.	.	.	.	.	.	.	.	.	.	.	.	.	.	.	.	.	.	.	.	.	.	.	.	.	.	.	.	.	.	.	.	.	.	.	.	.	.	.	.	.	.	K	.	D
1043	ACB87834.1	130		.	.	.	.	.	.	.	.	.	.	.	.	.	.	.	.	.	.	.	.	.	.	.	.	.	.	.	.	.	.	.	.	.	.	.	.	.	.	.	.	.	.	.	K	.	D
1044	BAM85432.1	130		.	.	.	.	.	.	.	.	.	.	.	.	.	.	.	.	.	.	.	.	.	.	.	.	.	.	.	.	.	.	.	.	K	.	.	.	.	.	.	.	.	.	E	.	.	D
1045	BAM85444.1	130		.	.	.	.	.	.	.	.	.	.	.	.	.	.	.	.	.	.	.	.	.	.	.	.	.	.	.	.	.	.	.	.	.	.	.	.	.	.	.	.	.	.	.	K	.	D
1046	AMM75860.1	45		.	.	.	.	.	.	.	.	.	.	.	.	.	.	.	.	.	.	.	.	.	.	.	.	.	.	.	.	.	.	.	.	.	.	.	.	.	X	.	.	.	.	X	.	.	D
1047	ACB87819.1	130		.	.	.	.	.	.	.	.	.	.	.	.	.	.	.	.	.	.	.	.	.	.	.	.	.	.	.	.	.	.	.	.	K	.	.	.	.	.	.	.	.	.	E	.	.	D
1048	BAM85369.1	130		.	.	.	.	.	.	.	.	.	.	.	.	.	.	.	.	.	.	.	.	.	.	.	.	.	.	.	.	.	.	.	.	.	.	.	.	.	.	.	.	.	.	E	.	.	D
1049	BCL11791.1	130		.	.	.	.	.	.	.	.	.	.	.	.	.	.	.	.	.	.	.	.	.	.	.	.	.	.	.	.	.	.	.	.	.	.	.	.	.	.	.	.	.	.	E	.	.	D
1050	AMX81237.1	66		.	.	.	.	.	.	.	.	.	.	.	.	.	.	.	.	.	R	.	.	.	G	.	.	.	.	.	.	.	.	.	.	.	.	.	.	.	.	.	.	.	.	.	.	.	D
1051	SPJ11062.1	100		.	.	.	.	.	.	.	.	.	.	.	.	.	.	V	.	.	.	.	.	.	.	.	.	.	.	.	.	.	.	.	.	.	.	.	.	.	.	.	.	.	.	.	.	.	D
1052	XP_028539032.1	143		.	.	.	.	.	.	Q	.	.	.	.	.	.	.	V	.	.	.	.	.	.	.	.	.	.	.	.	.	.	.	.	T	.	.	S	.	.	.	.	.	.	.	.	.	.	N
1053	SOV78185.1	137		.	.	.	.	.	.	.	.	.	.	.	K	.	.	I	.	.	.	.	.	.	.	.	.	.	.	.	.	.	.	.	.	.	.	.	.	.	.	.	.	.	.	.	.	.	N
1054	XP_018641247.1	119		.	.	.	.	.	V	.	.	.	.	.	.	.	.	V	.	.	.	.	.	.	.	.	.	.	.	.	.	.	.	.	T	.	.	S	.	.	K	.	.	.	.	.	.	.	N
1055	SOV23410.1	119		.	.	.	.	.	V	.	.	.	.	.	.	.	.	V	.	.	.	.	.	.	.	.	.	.	.	.	.	.	.	.	T	.	.	S	.	.	K	.	.	.	.	.	.	.	N
1056	SOV15862.1	119		.	.	.	.	.	V	.	.	.	.	.	.	.	.	V	.	.	.	.	.	.	.	.	.	.	.	.	.	.	.	.	T	.	.	S	.	.	K	.	.	.	.	.	.	.	N
1057	ACN69713.1	30		.	.	.	.	.	.	.	.	E	N	A	K	.	.	I	.	A	.	R	.	.	.	.	.	.	.	.	V	.	.	.	.	D	V	S	.	.	.	.	.	.	.	.	D	.	R
1058	ACN69769.1	30		.	.	.	.	.	.	.	.	E	N	A	K	.	.	I	.	A	.	R	.	.	.	.	.	.	.	.	V	.	.	.	.	D	V	S	.	.	.	.	.	.	.	.	D	.	R
1059	ACN69707.1	30		.	.	.	.	.	.	.	.	E	N	A	K	.	.	I	.	A	.	R	.	.	.	.	.	.	.	.	V	.	.	.	.	V	V	S	.	.	.	.	.	.	.	.	D	.	R
1060	ACN69725.1	30		.	.	.	.	.	.	.	.	E	N	A	K	.	.	I	.	A	.	R	.	.	.	.	.	.	.	.	V	.	.	.	.	A	V	S	.	.	.	.	.	.	.	.	D	.	R
1061	ACN69705.1	30		.	.	.	.	.	.	.	.	E	N	A	K	.	.	I	.	A	.	R	.	.	.	.	.	.	.	.	V	.	.	.	.	D	V	S	.	.	.	.	.	.	.	.	D	.	R
1062	ACN69757.1	30		.	.	.	.	.	.	.	.	E	N	A	K	.	.	I	.	A	.	R	.	.	.	.	.	.	.	.	V	.	.	.	.	D	V	S	.	.	.	.	.	.	.	.	D	.	R
1063	ACN69698.1	30		.	.	.	.	.	.	.	.	E	N	A	K	.	.	I	.	A	.	R	.	.	.	.	.	.	.	.	V	.	.	.	.	A	V	S	.	.	.	.	.	.	.	.	D	.	R
1064	AAL83941.1	28		.	.	.	.	.	.	.	.	E	N	A	K	.	.	I	.	A	.	R	.	.	.	.	.	.	.	.	V	.	.	.	.	A	V	S	.	.	.	.	.	.	.	.	D	.	R
1065	ACN69712.1	30		.	.	.	.	.	.	.	.	E	N	A	K	.	.	I	.	A	.	R	.	.	.	.	.	.	.	.	V	.	.	.	.	D	V	S	.	.	.	.	.	.	.	.	D	.	R
1066	ACN69766.1	30		.	.	.	.	.	.	.	.	E	N	A	K	.	.	I	.	A	.	R	.	.	.	.	.	.	.	.	V	.	.	.	.	D	V	S	.	.	.	.	.	.	.	.	D	.	R
1067	ACN69709.1	30		.	.	.	.	.	.	.	.	E	N	A	K	.	.	I	.	A	.	R	.	.	.	.	.	.	.	.	V	.	.	.	.	A	V	S	.	.	.	.	.	.	.	.	D	.	R
1068	ACN69783.1	30		.	.	.	.	.	.	.	.	E	N	A	K	.	.	I	.	A	.	R	.	.	.	.	.	.	.	.	V	.	.	.	.	D	V	S	.	.	.	.	.	.	.	.	D	.	R
1069	ACN69729.1	30		.	.	.	.	.	.	.	.	E	N	A	K	.	.	I	.	A	.	R	.	.	.	.	.	.	.	.	V	.	.	.	.	D	V	S	.	.	.	.	.	.	.	.	D	.	R
1070	ACN69702.1	30		.	.	.	.	.	.	.	.	E	N	A	K	.	.	I	.	A	.	R	.	.	.	.	.	.	.	.	V	.	.	.	.	A	V	S	.	.	.	.	.	.	.	.	D	.	R
1071	AAL83940.1	28		.	.	.	.	.	.	.	.	E	N	A	K	.	.	I	.	A	.	R	.	.	.	.	.	.	.	.	V	.	.	.	.	A	V	S	.	.	.	.	.	.	.	.	D	.	R
1072	ACN69764.1	30		.	.	.	.	.	.	.	.	E	N	A	K	.	.	I	.	A	.	R	.	.	.	.	.	.	.	.	V	.	.	.	.	A	V	S	.	.	K	.	.	.	.	.	D	.	R
1073	ACN69756.1	30		.	.	.	.	.	.	.	.	E	N	A	K	.	.	I	.	A	.	R	.	.	.	.	.	.	.	.	V	.	.	.	.	.	V	S	.	.	.	.	.	.	.	.	D	.	R
1074	ACN69753.1	30		.	.	.	.	.	.	.	.	E	N	A	K	.	.	I	.	A	.	R	.	.	.	.	.	.	.	.	V	.	.	.	.	D	V	S	.	.	K	.	.	.	.	.	D	.	R
1075	ACN69720.1	30		.	.	.	.	.	.	.	.	E	N	A	K	.	.	I	.	A	.	R	.	.	.	.	.	.	.	.	V	.	.	.	.	D	V	S	.	.	N	.	.	.	.	.	D	.	R
1076	ACN69748.1	30		.	.	.	.	.	.	.	.	E	N	A	K	.	.	I	.	A	.	R	.	.	.	.	.	.	.	.	V	.	.	.	.	A	V	S	.	.	.	.	.	.	.	.	D	.	R
1077	ACN69735.1	30		.	.	.	.	.	.	.	.	E	N	A	K	.	.	I	.	A	.	R	.	.	.	.	.	.	.	.	V	.	.	.	.	A	V	S	.	.	.	.	.	.	.	.	D	.	R
1078	ACN69715.1	30		.	.	.	.	.	.	.	.	E	N	A	K	.	.	I	.	A	.	R	.	.	.	.	.	.	.	.	V	.	.	.	.	A	V	S	.	.	.	.	.	.	.	.	D	.	R
1079	ACN69716.1	30		.	.	.	.	.	.	.	.	E	N	A	K	.	.	I	.	A	.	R	.	.	.	.	.	.	.	.	V	.	.	.	.	A	V	S	.	.	R	.	.	.	.	.	D	.	R
1080	ACN69749.1	30		.	.	.	.	.	.	.	.	E	N	A	K	.	.	I	.	A	.	R	.	.	.	.	.	.	.	.	V	.	.	.	.	A	V	S	.	.	K	.	.	.	.	.	D	.	R
1081	ACN69706.1	30		.	.	.	.	.	.	.	.	E	N	A	K	.	.	I	.	A	.	R	.	.	.	.	.	.	.	.	V	.	.	.	.	D	V	S	.	.	K	.	.	.	.	.	D	.	R
1082	ACN69727.1	30		.	.	.	.	.	.	.	.	E	N	A	K	.	.	I	.	A	.	R	.	.	.	.	.	.	.	.	V	.	.	.	.	A	V	S	.	.	.	.	.	.	.	.	D	.	R
1083	ACN69697.1	30		.	.	.	.	.	.	.	.	E	N	A	K	.	.	I	.	A	.	R	.	.	.	.	.	.	.	.	V	.	.	.	.	D	V	S	.	.	K	.	.	.	.	.	D	.	R
1084	ACN69779.1	30		.	.	.	.	.	.	.	.	E	N	A	K	.	.	I	.	A	.	R	.	.	.	.	.	.	.	.	V	.	.	.	.	D	V	S	.	.	R	.	.	.	.	.	D	.	R
1085	ACN69704.1	30		.	.	.	.	.	.	.	.	E	N	A	K	.	.	I	.	A	.	R	.	.	.	.	.	.	.	.	V	.	.	.	.	D	V	S	.	.	K	.	.	.	.	.	D	.	R
1086	ACN69717.1	30		.	.	.	.	.	.	.	.	E	N	A	K	.	.	I	.	A	.	R	.	.	.	.	.	.	.	.	V	.	.	.	.	D	V	S	.	.	K	.	.	.	.	.	D	.	R
1087	ACN69718.1	30		.	.	.	.	.	.	.	.	E	N	A	K	.	.	I	.	A	.	R	.	.	.	.	.	.	.	.	V	.	.	.	.	D	V	S	.	.	K	.	.	.	.	.	D	.	R
1088	ACN69772.1	30		.	.	.	.	.	.	.	.	E	N	A	K	.	.	I	.	A	.	R	.	.	.	.	.	.	.	.	V	.	.	.	.	D	V	S	.	.	K	.	.	.	.	.	D	.	R
1089	ACN69736.1	30		.	.	.	.	.	.	.	.	E	N	A	K	.	.	I	.	A	.	R	.	.	.	.	.	.	.	.	V	.	.	.	.	D	V	S	.	.	K	.	.	.	.	.	D	.	R
1090	ACN69699.1	30		.	.	.	.	.	.	.	.	E	N	A	K	.	.	I	.	A	.	R	.	.	.	.	.	.	.	.	V	.	.	.	.	D	V	S	.	.	K	.	.	.	.	.	D	.	R
1091	ACN69701.1	30		.	.	.	.	.	.	.	.	E	N	A	K	.	.	I	.	A	.	R	.	.	.	.	.	.	.	.	V	.	.	.	.	A	V	S	.	.	K	.	.	.	.	.	D	.	R
1092	ACN69696.1	30		.	.	.	.	.	.	.	.	E	N	A	K	.	.	I	.	A	.	R	.	.	.	.	.	.	.	.	V	.	.	.	.	D	V	S	.	.	K	.	.	.	.	.	D	.	R
1093	ACN69728.1	30		.	.	.	.	.	.	.	.	E	N	A	K	.	.	I	.	A	.	R	.	.	.	.	.	.	.	.	V	.	.	.	.	D	V	S	.	.	K	.	.	.	.	.	D	.	R
1094	ACN69775.1	30		.	.	.	.	.	.	.	.	E	N	A	K	.	.	I	.	A	.	R	.	.	.	.	.	.	.	.	V	.	.	.	.	D	V	S	.	.	K	.	.	.	.	.	D	.	R
1095	XP_028543689.1	75		.	.	.	.	.	V	.	.	V	N	S	K	.	.	I	.	A	.	.	.	.	.	.	.	.	.	.	V	.	.	.	.	.	V	S	.	.	.	.	.	.	.	.	Q	.	K
1096	ACN69763.1	30		.	.	.	.	.	.	.	.	E	N	A	K	.	.	I	.	A	.	R	.	.	.	.	.	.	.	.	V	.	.	.	.	A	V	S	.	.	K	.	.	.	.	.	D	.	R
1097	ACN69760.1	30		.	.	.	.	.	.	.	.	E	N	A	K	.	.	I	.	A	.	R	.	.	.	.	.	.	.	.	V	.	.	.	.	D	V	S	.	.	K	.	.	.	.	.	D	.	R
1098	AUR33969.1	57	Plasmodium malariae	.	.	.	.	.	.	.	.	K	N	S	K	.	.	I	.	G	.	.	.	.	.	.	.	.	.	.	.	.	.	.	.	.	V	N	.	.	.	.	.	.	.	.	.	R	N
1099	AUR33974.1	57	Plasmodium malariae	.	.	.	.	.	.	.	.	K	N	S	K	.	.	I	.	G	.	.	.	.	.	.	.	.	.	.	.	.	.	.	.	.	V	N	.	.	.	.	.	.	.	.	.	R	N
1100	XP_004222555.1	46		.	.	.	.	.	.	.	.	E	N	S	K	.	.	I	.	G	.	.	.	.	.	.	.	.	.	.	V	.	.	.	.	E	V	S	.	.	R	.	.	.	.	.	D	.	K
1101	AUR33972.1	57	Plasmodium malariae	.	.	.	.	.	.	.	.	K	N	S	K	.	.	I	.	G	.	.	.	.	.	.	.	.	.	.	.	.	.	.	.	.	V	N	.	.	.	.	.	.	.	.	.	R	N
1102	ACN69782.1	30		.	.	.	.	.	.	.	.	E	N	A	K	.	.	I	.	A	.	R	.	.	.	.	.	.	.	.	V	.	.	.	.	D	V	S	.	.	K	.	.	.	.	.	D	.	R
1103	AUR33973.1	57	Plasmodium malariae	.	.	.	.	.	.	.	.	K	N	S	K	.	.	I	.	G	.	.	.	.	.	.	.	.	.	.	.	.	.	.	.	.	V	N	.	.	.	.	.	.	.	.	.	R	N
1104	ACN69761.1	30		.	.	.	.	.	.	.	.	E	N	A	K	.	.	I	.	A	.	R	.	.	.	.	.	.	.	.	V	.	.	.	.	D	V	S	.	.	K	.	.	.	.	.	D	.	R
1105	ACN69695.1	30		.	.	.	.	.	.	.	.	E	N	A	K	.	.	I	.	A	.	R	.	.	.	.	.	.	.	.	V	.	.	.	.	D	V	S	.	.	K	.	.	.	.	.	D	.	R
1106	AUR33975.1	57	Plasmodium malariae	.	.	.	.	.	.	.	.	K	N	S	K	.	.	I	.	G	.	.	.	.	.	.	.	.	.	.	.	.	.	.	.	.	V	D	.	.	.	.	.	.	.	.	.	R	N
1107	AUR33955.1	57	Plasmodium malariae	.	.	.	.	.	.	.	.	K	N	S	K	.	.	I	.	G	.	.	.	.	.	.	.	.	.	.	.	.	.	.	.	.	V	D	.	.	.	.	.	.	.	.	.	R	N
1108	AUR33966.1	57	Plasmodium malariae	.	.	.	.	.	.	.	.	K	N	S	K	.	.	I	.	G	.	.	.	.	.	.	.	.	.	.	.	.	.	.	.	.	V	D	.	.	.	.	.	.	.	.	.	K	N
1109	SBS85741.1	74	Plasmodium malariae	.	.	.	.	.	.	.	.	K	N	S	K	.	.	I	.	G	.	.	.	.	.	.	.	.	.	.	.	.	.	.	.	.	V	N	.	.	.	.	.	.	.	.	.	R	N
1110	AUR33968.1	57	Plasmodium malariae	.	.	.	.	.	.	.	.	K	N	S	K	.	.	I	.	G	.	.	.	.	.	.	.	.	.	.	.	.	.	.	.	.	V	D	.	.	.	.	.	.	.	.	.	K	N
1111	AKQ33103.1	75		.	.	.	.	.	.	.	.	G	N	S	N	.	.	I	.	.	.	.	.	.	.	.	.	.	.	.	V	.	.	.	.	Q	V	S	.	.	.	.	.	.	.	.	D	.	K
1112	AKQ33105.1	71		.	.	.	.	.	.	.	.	G	N	S	N	.	.	I	.	.	.	.	.	.	.	.	.	.	.	.	V	.	.	.	.	Q	V	S	.	.	.	.	.	.	.	.	D	.	K
1113	AKQ33085.1	75		.	.	.	.	.	.	.	.	E	N	S	K	.	.	I	.	G	.	.	.	.	.	.	.	.	.	.	V	.	.	.	.	E	V	S	.	.	R	.	.	.	.	.	D	.	K
1114	AKQ33102.1	70		.	.	.	.	.	.	.	.	G	N	S	N	.	.	I	.	.	.	.	.	.	.	.	.	.	.	.	V	.	.	.	.	Q	V	S	.	.	.	.	.	.	.	.	D	.	K
1115	XP_028861748.1	74	Plasmodium malariae	.	.	.	.	.	.	.	.	K	N	S	K	.	.	I	.	G	.	.	.	.	.	.	.	.	.	.	.	.	.	.	.	.	V	D	.	.	.	.	.	.	.	.	.	R	N
1116	AKQ33090.1	75		.	.	.	.	.	.	.	.	G	N	A	S	.	.	I	.	A	.	.	.	.	.	.	.	.	.	.	V	.	.	.	.	.	V	S	.	.	.	.	.	.	.	.	.	.	K
1117	APT35579.1	26		.	.	.	.	.	.	.	.	E	N	A	K	.	.	I	.	A	.	R	.	.	.	.	.	.	.	.	V	.	.	.	.	A	V	S	.	.	.	.	.	.	.	.	D	.	R
1118	AUR33970.1	57	Plasmodium malariae	.	.	.	.	.	.	.	.	K	N	S	K	.	.	I	.	G	.	.	.	.	.	.	.	.	.	.	.	.	.	.	.	.	V	N	.	.	.	.	.	.	.	.	.	R	N
1119	ACN69768.1	30		.	.	.	.	.	.	.	.	E	N	A	K	.	.	I	.	A	.	R	.	.	.	.	.	.	.	.	V	.	K	.	.	A	V	S	.	.	K	.	.	.	.	.	D	.	R
1120	QEQ12063.1	33		.	.	.	.	.	.	.	.	E	N	A	K	.	.	I	.	A	.	R	.	.	.	.	.	.	.	.	V	.	.	.	.	D	V	S	.	.	.	.	.	.	.	.	D	.	R
1121	APT35538.1	26		.	.	.	.	.	.	.	.	E	N	A	K	.	.	I	.	A	.	R	.	.	.	.	.	.	.	.	V	.	.	.	.	A	V	S	.	.	.	.	.	.	.	.	D	.	R
1122	QEQ12019.1	33		.	.	.	.	.	.	.	.	E	N	A	K	.	.	I	.	A	.	R	.	.	.	.	.	.	.	.	V	.	.	.	.	A	V	S	.	.	.	.	.	.	.	.	D	.	R
1123	QEQ12022.1	33		.	.	.	.	.	.	.	.	E	N	A	K	.	.	I	.	A	.	R	.	.	.	.	.	.	.	.	V	.	.	.	.	D	V	S	.	.	.	.	.	.	.	.	D	.	R
1124	QEQ11982.1	33		.	.	.	.	.	.	.	.	E	N	A	K	.	.	I	.	A	.	R	.	.	.	.	.	.	.	.	V	.	.	.	.	D	V	S	.	.	.	.	.	.	.	.	D	.	R
1125	APT35512.1	26		.	.	.	.	.	.	.	.	E	N	A	K	.	.	I	.	A	.	R	.	.	.	.	.	.	.	.	V	.	.	.	.	A	V	S	.	.	.	.	.	.	.	.	D	.	R
1126	AKQ33101.1	70		.	.	.	.	.	.	.	.	G	N	S	N	.	.	I	.	.	.	.	.	.	.	.	.	.	.	.	V	.	.	.	.	E	V	S	.	.	K	.	.	.	.	.	.	.	N
1127	APT35516.1	26		.	.	.	.	.	.	.	.	E	N	A	K	.	.	I	.	A	.	R	.	.	.	.	.	.	.	.	V	.	.	.	.	A	V	S	.	.	.	.	.	.	.	.	D	.	R
1128	ACN69733.1	30		.	.	.	.	.	.	.	.	E	N	A	K	.	.	I	.	A	.	R	.	.	.	.	.	.	.	.	V	.	.	.	.	D	V	S	.	.	K	.	.	.	.	.	D	.	R
1129	ABM63521.1	75		.	.	.	.	.	.	.	.	E	N	A	K	.	.	I	.	A	.	R	.	.	.	.	.	.	.	.	V	.	.	.	.	.	V	S	.	.	.	.	.	.	.	.	D	.	R
1130	SBT71431.1	74	Plasmodium malariae	.	.	.	.	.	.	.	.	K	N	S	K	.	.	I	.	G	.	.	.	.	.	.	.	.	.	.	.	.	.	.	.	.	V	D	.	.	.	.	.	.	.	.	.	R	N
1131	AKQ33106.1	70		.	.	.	.	.	.	.	.	G	N	S	N	.	.	I	.	.	.	.	.	.	.	.	.	.	.	.	V	.	.	.	.	Q	V	S	.	.	N	.	.	.	.	.	.	.	N
1132	QEQ12041.1	33		.	.	.	.	.	.	.	.	E	N	A	K	.	.	I	.	A	.	R	.	.	.	.	.	.	.	.	V	.	.	.	.	A	V	S	.	.	.	.	.	.	.	.	D	.	R
1133	QEQ12038.1	33		.	.	.	.	.	.	.	.	E	N	A	K	.	.	I	.	A	.	R	.	.	.	.	.	.	.	.	V	.	.	.	.	D	V	S	.	.	.	.	.	.	.	.	D	.	R
1134	QEQ12000.1	33		.	.	.	.	.	.	.	.	E	N	A	K	.	.	I	.	A	.	R	.	.	.	.	.	.	.	.	V	.	.	.	.	A	V	S	.	.	.	.	.	.	.	.	D	.	R
1135	AKQ33086.1	75		.	.	.	.	.	.	.	.	E	N	S	K	.	.	I	.	G	.	.	.	.	.	.	.	.	.	.	V	.	.	.	.	E	V	S	.	.	R	.	.	.	.	.	D	.	K
1136	AZL41003.1	75		.	.	.	.	.	.	.	.	E	N	A	K	.	.	I	.	A	.	R	.	.	.	.	.	.	.	.	V	.	.	.	.	D	V	S	.	.	.	.	.	.	.	.	D	.	R
1137	AKQ33104.1	75		.	.	.	.	.	.	.	.	G	N	S	N	.	.	I	.	.	.	.	.	.	.	.	.	.	.	.	V	.	.	.	.	E	V	S	.	.	K	.	.	.	.	.	.	.	N
1138	AUR33953.1	57	Plasmodium malariae	.	.	.	.	.	.	.	.	K	N	S	K	.	.	I	.	G	.	.	.	.	.	.	.	.	.	.	.	.	.	.	.	.	V	N	.	.	.	.	.	.	.	.	.	R	N
1139	ABN11190.1	75		.	.	.	.	.	.	.	.	E	N	A	K	.	.	I	.	A	.	R	.	.	.	.	.	.	.	.	V	.	.	.	.	.	V	S	.	.	.	.	.	.	.	.	D	.	R
1140	APT35521.1	26		.	.	.	.	.	.	.	.	E	N	A	K	.	.	I	.	A	.	R	.	.	.	.	.	.	.	.	V	.	.	.	.	D	V	S	.	.	.	.	.	.	.	.	D	.	R
1141	AUR33954.1	57	Plasmodium malariae	.	.	.	.	.	.	.	.	K	N	S	K	.	.	I	.	G	.	.	.	.	.	.	.	.	.	.	.	.	.	.	.	.	V	N	.	.	.	.	.	.	.	.	.	R	N
1142	AKQ33083.1	75		.	.	.	.	.	.	.	.	E	N	S	K	.	.	I	.	G	.	.	.	.	.	.	.	.	.	.	V	.	.	.	.	.	V	S	.	.	K	.	.	.	.	.	D	.	K
1143	AGY92834.1	20		.	.	.	.	.	.	.	.	E	N	A	K	.	.	I	.	A	.	R	.	.	.	.	.	.	.	.	V	.	.	.	.	D	V	S	.	.	.	.	.	.	.	.	D	.	R
1144	QEQ12006.1	33		.	.	.	.	.	.	.	.	E	N	A	K	.	.	I	.	A	.	R	.	.	.	.	.	.	.	.	V	.	.	.	.	A	V	S	.	.	.	.	.	.	.	.	D	.	R
1145	ACB55389.1	75		.	.	.	.	.	.	.	.	E	N	A	K	.	.	I	.	A	.	R	.	.	.	.	.	.	.	.	V	.	.	.	.	A	V	S	.	.	.	.	.	.	.	.	D	.	R
1146	APT35519.1	26		.	.	.	.	.	.	.	.	E	N	A	K	.	.	I	.	A	.	R	.	.	.	.	.	.	.	.	V	.	.	.	.	A	V	S	.	.	.	.	.	.	.	.	D	.	R
1147	QEQ11994.1	33		.	.	.	.	.	.	.	.	E	N	A	K	.	.	I	.	A	.	R	.	.	.	.	.	.	.	.	V	.	.	.	.	D	V	S	.	.	.	.	.	.	.	.	D	.	R
1148	ABM63517.1	15		.	.	.	.	.	.	.	.	E	N	A	K	.	.	I	.	A	.	R	.	.	.	.	.	.	.	.	V	.	.	.	.	A	V	S	.	.	N	.	.	.	.	.	D	.	R
1149	QEQ12003.1	33		.	.	.	.	.	.	.	.	E	N	A	K	.	.	I	.	A	.	R	.	.	.	.	.	.	.	.	V	.	.	.	.	A	V	S	.	.	.	.	.	.	.	.	D	.	R
1150	AGG39600.1	68		.	.	.	.	.	.	.	.	E	N	A	K	.	.	I	.	A	.	R	.	.	.	.	.	.	.	.	V	.	.	.	.	D	V	S	.	.	K	.	.	.	.	.	D	.	R
1151	ACY68791.1	75		.	.	.	.	.	.	.	.	E	N	A	K	.	.	I	.	A	.	R	.	.	.	.	.	.	.	.	V	.	.	.	.	D	V	S	.	.	K	.	.	.	.	.	.	.	R
1152	QEQ12045.1	33		.	.	.	.	.	.	.	.	E	N	A	K	.	.	I	.	A	.	R	.	.	.	.	.	.	.	.	V	.	.	.	.	D	V	S	.	.	.	.	.	.	.	.	D	.	R
1153	QEQ12039.1	33		.	.	.	.	.	.	.	.	E	N	A	K	.	.	I	.	A	.	R	.	.	.	.	.	.	.	.	V	.	.	.	.	A	V	S	.	.	.	.	.	.	.	.	D	.	R
1154	QEQ12042.1	33		.	.	.	.	.	.	.	.	E	N	A	K	.	.	I	.	A	.	R	.	.	.	.	.	.	.	.	V	.	.	.	.	D	V	S	.	.	.	.	.	.	.	.	D	.	R
1155	AUR33960.1	57	Plasmodium malariae	.	.	.	.	.	.	.	.	K	N	S	K	.	.	I	.	G	.	.	.	.	.	.	.	.	.	.	.	.	.	.	.	.	V	N	.	.	.	.	.	.	.	.	.	R	N
1156	2J4W_D	33		.	.	.	.	.	.	.	.	E	N	A	K	.	.	I	.	A	.	R	.	.	.	.	.	.	.	.	V	.	.	.	.	D	V	S	.	.	R	.	.	.	.	.	D	.	K
1157	ACB55371.1	75		.	.	.	.	.	.	.	.	E	N	A	K	.	.	I	.	A	.	R	.	.	.	.	.	.	.	.	V	.	.	.	.	A	V	S	.	.	.	.	.	.	.	.	D	.	R
1158	AUR33959.1	57	Plasmodium malariae	.	.	.	.	.	.	.	.	K	N	S	K	.	.	I	.	G	.	.	.	.	.	.	.	.	.	.	.	.	.	.	.	.	V	N	.	.	.	.	.	.	.	.	.	R	N
1159	BAH96576.1	75		.	.	.	.	.	.	.	.	E	N	A	K	.	.	I	.	A	.	R	.	.	.	.	.	.	.	.	V	.	.	.	.	A	V	S	.	.	.	.	.	.	.	.	D	.	R
1160	AZL41010.1	75		.	.	.	.	.	.	.	.	E	N	A	K	.	.	I	.	A	.	R	.	.	.	.	.	.	.	.	V	.	.	.	.	D	V	S	.	.	.	.	.	.	.	.	D	.	R
1161	AGG39617.1	68		.	.	.	.	.	.	.	.	E	N	A	K	.	.	I	.	A	.	R	.	.	.	.	.	.	.	.	V	.	.	.	.	D	V	S	.	.	.	.	.	.	.	.	D	.	R
1162	AZL41006.1	75		.	.	.	.	.	.	.	.	E	N	A	K	.	.	I	.	A	.	R	.	.	.	.	.	.	.	.	V	.	.	.	.	D	V	S	.	.	.	.	.	.	.	.	D	.	R
1163	AGG39618.1	68		.	.	.	.	.	.	.	.	E	N	A	K	.	.	I	.	A	.	R	.	.	.	.	.	.	.	.	V	.	.	.	.	D	V	S	.	.	.	.	.	.	.	.	D	.	R
1164	AUR33961.1	57	Plasmodium malariae	.	.	.	.	.	.	.	.	K	N	S	K	.	.	I	.	G	.	.	.	.	.	.	.	.	.	.	.	.	.	.	.	.	V	D	.	.	.	.	.	.	.	.	.	R	N
1165	AZL41002.1	75		.	.	.	.	.	.	.	.	E	N	A	K	.	.	I	.	A	.	R	.	.	.	.	.	.	.	.	V	.	.	.	.	D	V	S	.	.	.	.	.	.	.	.	D	.	R
1166	AGG39625.1	68		.	.	.	.	.	.	.	.	E	N	A	K	.	.	I	.	A	.	R	.	.	.	.	.	.	.	.	V	.	.	.	.	A	V	S	.	.	.	.	.	.	.	.	D	.	R
1167	AGS41020.1	75		.	.	.	.	.	.	.	.	E	N	A	K	.	.	I	.	A	.	R	.	.	.	.	.	.	.	.	V	.	.	.	.	A	V	S	.	.	.	.	.	.	.	.	D	.	R
1168	QEQ11976.1	33		.	.	.	.	.	.	.	.	E	N	A	K	.	.	I	.	A	.	R	.	.	.	.	.	.	.	.	V	.	.	.	.	D	V	S	.	.	.	.	.	.	.	.	D	.	R
1169	AZL41020.1	75		.	.	.	.	.	.	.	.	E	N	A	K	.	.	I	.	A	.	R	.	.	.	.	.	.	.	.	V	.	.	.	.	D	V	S	.	.	.	.	.	.	.	.	D	.	R
1170	QEQ12057.1	33		.	.	.	.	.	.	.	.	E	N	A	K	.	.	I	.	A	.	R	.	.	.	.	.	.	.	.	V	.	.	.	.	D	V	S	.	.	K	.	.	.	.	.	D	.	R
1171	QEQ12031.1	33		.	.	.	.	.	.	.	.	E	N	A	K	.	.	I	.	A	.	R	.	.	.	.	.	.	.	.	V	.	.	.	.	A	V	S	.	.	.	.	.	.	.	.	D	.	R
1172	AGS40997.1	75		.	.	.	.	.	.	.	.	E	N	A	K	.	.	I	.	A	.	R	.	.	.	.	.	.	.	.	V	.	.	.	.	D	V	S	.	.	K	.	.	.	.	.	D	.	R
1173	AZL41011.1	75		.	.	.	.	.	.	.	.	E	N	A	K	.	.	I	.	A	.	R	.	.	.	.	.	.	.	.	V	.	.	.	.	D	V	S	.	.	.	.	.	.	.	.	D	.	R
1174	AGS40989.1	75		.	.	.	.	.	.	.	.	E	N	A	K	.	.	I	.	A	.	R	.	.	.	.	.	.	.	.	V	.	.	.	.	D	V	S	.	.	K	.	.	.	.	.	D	.	R
1175	AGS40961.1	75		.	.	.	.	.	.	.	.	E	N	A	K	.	.	I	.	A	.	R	.	.	.	.	.	.	.	.	V	.	.	.	.	D	V	S	.	.	K	.	.	.	.	.	D	.	R
1176	AGS40992.1	75		.	.	.	.	.	.	.	.	E	N	A	K	.	.	I	.	A	.	R	.	.	.	.	.	.	.	.	V	.	.	.	.	D	V	S	.	.	K	.	.	.	.	.	D	.	R
1177	AZL41028.1	75		.	.	.	.	.	.	.	.	E	N	A	K	.	.	I	.	A	.	R	.	.	.	.	.	.	.	.	V	.	.	.	.	A	V	S	.	.	.	.	.	.	.	.	D	.	R
1178	AGS40944.1	75		.	.	.	.	.	.	.	.	E	N	A	K	.	.	I	.	A	.	R	.	.	.	.	.	.	.	.	V	.	.	.	.	D	V	S	.	.	K	.	.	.	.	.	D	.	R
1179	AGS40934.1	75		.	.	.	.	.	.	.	.	E	N	A	K	.	.	I	.	A	.	R	.	.	.	.	.	.	.	.	V	.	.	.	.	D	V	S	.	.	K	.	.	.	.	.	D	.	R
1180	AGS40952.1	75		.	.	.	.	.	.	.	.	E	N	A	K	.	.	I	.	A	.	R	.	.	.	.	.	.	.	.	V	.	.	.	.	D	V	S	.	.	K	.	.	.	.	.	D	.	R
1181	APT35511.1	26		.	.	.	.	.	.	.	.	E	N	A	K	.	.	I	.	A	.	R	.	.	.	.	.	.	.	.	V	.	.	.	.	A	V	S	.	.	.	.	.	.	.	.	D	.	R
1182	QEQ12053.1	33		.	.	.	.	.	.	.	.	E	N	A	K	.	.	I	.	A	.	R	.	.	.	.	.	.	.	.	V	.	.	.	.	A	V	S	.	.	R	.	.	.	.	.	D	.	R
1183	QEQ12018.1	33		.	.	.	.	.	.	.	.	E	N	A	K	.	.	I	.	A	.	R	.	.	.	.	.	.	.	.	V	.	.	.	.	A	V	S	.	.	.	.	.	.	.	.	D	.	R
1184	AGS40951.1	75		.	.	.	.	.	.	.	.	E	N	A	K	.	.	I	.	A	.	R	.	.	.	.	.	.	.	.	V	.	.	.	.	D	V	S	.	.	K	.	.	.	.	.	D	.	R
1185	AGS40986.1	75		.	.	.	.	.	.	.	.	E	N	A	K	.	.	I	.	A	.	R	.	.	.	.	.	.	.	.	V	.	.	.	.	D	V	S	.	.	K	.	.	.	.	.	D	.	R
1186	AGG39613.1	68		.	.	.	.	.	.	.	.	E	N	A	K	.	.	I	.	A	.	R	.	.	.	.	.	.	.	.	V	.	.	.	.	A	V	S	.	.	.	.	.	.	.	.	D	.	R
1187	AGS40991.1	75		.	.	.	.	.	.	.	.	E	N	A	K	.	.	I	.	A	.	R	.	.	.	.	.	.	.	.	V	.	.	.	.	D	V	S	.	.	K	.	.	.	.	.	D	.	R
1188	AGS40976.1	75		.	.	.	.	.	.	.	.	E	N	A	K	.	.	I	.	A	.	R	.	.	.	.	.	.	.	.	V	.	.	.	.	D	V	S	.	.	K	.	.	.	.	.	D	.	R
1189	APT35525.1	26		.	.	.	.	.	.	.	.	E	N	A	K	.	.	I	.	A	.	R	.	.	.	.	.	.	.	.	V	.	.	.	.	D	V	S	.	.	.	.	.	.	.	.	D	.	R
1190	ACY68827.1	75		.	.	.	.	.	.	.	.	E	N	A	K	.	.	I	.	A	.	R	.	.	.	.	.	.	.	.	V	.	.	.	.	A	V	S	.	.	.	.	.	.	.	.	D	.	R
1191	AGS41008.1	75		.	.	.	.	.	.	.	.	E	N	A	K	.	.	I	.	A	.	R	.	.	.	.	.	.	.	.	V	.	.	.	.	D	V	S	.	.	K	.	.	.	.	.	D	.	R
1192	VUZ96005.1	75		.	.	.	.	.	.	.	.	E	N	A	K	.	.	I	.	A	.	R	.	.	.	.	.	.	.	.	V	.	.	.	.	A	V	S	.	.	.	.	.	.	.	.	D	.	R
1193	QEQ12013.1	33		.	.	.	.	.	.	.	.	E	N	A	K	.	.	I	.	A	.	R	.	.	.	.	.	.	.	.	V	.	.	.	.	D	V	S	.	.	.	.	.	.	.	.	D	.	R
1194	ACY68820.1	75		.	.	.	.	.	.	.	.	E	N	A	K	.	.	I	.	A	.	R	.	.	.	.	.	.	.	.	V	.	.	.	.	.	V	S	.	.	.	.	.	.	.	.	D	.	R
1195	AKQ33084.1	75		.	.	.	.	.	.	.	.	E	N	S	K	.	.	I	.	G	.	.	.	.	.	.	.	.	.	.	V	.	.	.	.	.	V	S	.	.	K	.	.	.	.	.	D	.	K
1196	AAA29479.1	75		.	.	.	.	.	.	.	.	E	N	A	K	.	.	I	.	A	.	R	.	.	.	.	.	.	.	.	V	.	.	.	.	A	V	S	.	.	.	.	.	.	.	.	D	.	R
1197	APT35533.1	26		.	.	.	.	.	.	.	.	E	N	A	K	.	.	I	.	A	.	R	.	.	.	.	.	.	.	.	V	.	.	.	.	A	V	S	.	.	.	.	.	.	.	.	D	.	K
1198	ACY68849.1	75		.	.	.	.	.	.	.	.	E	N	A	K	.	.	I	.	A	.	R	.	.	.	.	.	.	.	.	V	.	.	.	.	.	V	S	.	.	.	.	.	.	.	.	D	.	R
1199	QEQ12036.1	33		.	.	.	.	.	.	.	.	E	N	A	K	.	.	I	.	A	.	R	.	.	.	.	.	.	.	.	V	.	.	.	.	A	V	S	.	.	.	.	.	.	.	.	D	.	R
1200	AKQ33097.1	75		.	.	.	.	.	.	.	.	G	N	S	N	.	.	I	.	A	.	.	.	.	.	.	.	.	.	.	V	.	.	.	.	Q	V	S	.	.	Q	.	.	.	.	.	.	.	N
1201	QEQ12011.1	33		.	.	.	.	.	.	.	.	E	N	A	K	.	.	I	.	A	.	R	.	.	.	.	.	.	.	.	V	.	.	.	.	A	V	S	.	.	.	.	.	.	.	.	D	.	R
1202	AGS40941.1	75		.	.	.	.	.	.	.	.	E	N	A	K	.	.	I	.	A	.	R	.	.	.	.	.	.	.	.	V	.	.	.	.	D	V	S	.	.	K	.	.	.	.	.	D	.	S
1203	AGS40942.1	75		.	.	.	.	.	.	.	.	E	N	A	K	.	.	I	.	A	.	R	.	.	.	.	.	.	.	.	V	.	.	.	.	D	V	S	.	.	K	.	.	.	.	.	D	.	S
1204	AGS41026.1	75		.	.	.	.	.	.	.	.	E	N	A	K	.	.	I	.	A	.	R	.	.	.	.	.	.	.	.	V	.	.	.	.	D	V	S	.	.	K	.	.	.	.	.	D	.	S
1205	AGG39615.1	68		.	.	.	.	.	.	.	.	E	N	A	K	.	.	I	.	A	.	R	.	.	.	.	.	.	.	.	V	.	.	.	.	D	V	S	.	.	.	.	.	.	.	.	D	.	R
1206	AGS40960.1	75		.	.	.	.	.	.	.	.	E	N	A	K	.	.	I	.	A	.	R	.	.	.	.	.	.	.	.	V	.	.	.	.	D	V	S	.	.	K	.	.	.	.	.	D	.	S
1207	AGS40933.1	75		.	.	.	.	.	.	.	.	E	N	A	K	.	.	I	.	A	.	R	.	.	.	.	.	.	.	.	V	.	.	.	.	A	V	S	.	.	.	.	.	.	.	.	D	.	S
1208	AGG39610.1	68		.	.	.	.	.	.	.	.	E	N	A	K	.	.	I	.	A	.	R	.	.	.	.	.	.	.	.	V	.	.	.	.	A	V	S	.	.	.	.	.	.	.	.	D	.	R
1209	AGS40948.1	75		.	.	.	.	.	.	.	.	E	N	A	K	.	.	I	.	A	.	R	.	.	.	.	.	.	.	.	V	.	.	.	.	A	V	S	.	.	.	.	.	.	.	.	D	.	R
1210	ACB55354.1	75		.	.	.	.	.	.	.	.	E	N	A	K	.	.	I	.	A	.	R	.	.	.	.	.	.	.	.	V	.	.	.	.	A	V	S	.	.	.	.	.	.	.	.	D	.	R
1211	AZL41023.1	75		.	.	.	.	.	.	.	.	E	N	A	K	.	.	I	.	A	.	R	.	.	.	.	.	.	.	.	V	.	.	.	.	D	V	S	.	.	.	.	.	.	.	.	D	.	R
1212	AGS40938.1	75		.	.	.	.	.	.	.	.	E	N	A	K	.	.	I	.	A	.	R	.	.	.	.	.	.	.	.	V	.	.	.	.	A	V	S	.	.	.	.	.	.	.	.	D	.	R
1213	AGS40993.1	75		.	.	.	.	.	.	.	.	E	N	A	K	.	.	I	.	A	.	R	.	.	.	.	.	.	.	.	V	.	.	.	.	A	V	S	.	.	.	.	.	.	.	.	D	.	R
1214	ACB55357.1	75		.	.	.	.	.	.	.	.	E	N	A	K	.	.	I	.	A	.	R	.	.	.	.	.	.	.	.	V	.	.	.	.	A	V	S	.	.	.	.	.	.	.	.	D	.	R
1215	APT35543.1	26		.	.	.	.	.	.	.	.	E	N	A	K	.	.	I	.	A	.	R	.	.	.	.	.	.	.	.	V	.	.	.	.	A	V	S	.	.	.	.	.	.	.	.	D	.	R
1216	UFQ05861.1	75		.	.	.	.	.	.	.	.	E	N	A	K	.	.	I	.	A	.	R	.	.	.	.	.	.	.	.	V	.	.	.	.	A	V	S	.	.	.	.	.	.	.	.	D	.	R
1217	ACY68802.1	75		.	.	.	.	.	.	.	.	E	N	A	K	.	.	I	.	A	.	R	.	.	.	.	.	.	.	.	V	.	.	.	.	A	V	S	.	.	.	.	.	.	.	.	D	.	R
1218	AGS40969.1	75		.	.	.	.	.	.	.	.	E	N	A	K	.	.	I	.	A	.	R	.	.	.	.	.	.	.	.	V	.	.	.	.	A	V	S	.	.	.	.	.	.	.	.	D	.	R
1219	AGS41021.1	75		.	.	.	.	.	.	.	.	E	N	A	K	.	.	I	.	A	.	R	.	.	.	.	.	.	.	.	V	.	.	.	.	A	V	S	.	.	.	.	.	.	.	.	D	.	R
1220	AGY92836.1	13		.	.	.	.	.	.	.	.	E	N	A	K	.	.	I	.	A	.	R	.	.	.	.	.	.	.	.	V	.	.	.	.	D	V	S	.	.	K	.	.	.	.	.	D	.	R
1221	AGS40988.1	75		.	.	.	.	.	.	.	.	E	N	A	K	.	.	I	.	A	.	R	.	.	.	.	.	.	.	.	V	.	.	.	.	A	V	S	.	.	.	.	.	.	.	.	D	.	S
1222	AGS41033.1	75		.	.	.	.	.	.	.	.	E	N	A	K	.	.	I	.	A	.	R	.	.	.	.	.	.	.	.	V	.	.	.	.	A	V	S	.	.	.	.	.	.	.	.	D	.	R
1223	AGS40935.1	75		.	.	.	.	.	.	.	.	E	N	A	K	.	.	I	.	A	.	R	.	.	.	.	.	.	.	.	V	.	.	.	.	A	V	S	.	.	.	.	.	.	.	.	D	.	R
1224	AGS40987.1	75		.	.	.	.	.	.	.	.	E	N	A	K	.	.	I	.	A	.	R	.	.	.	.	.	.	.	.	V	.	.	.	.	A	V	S	.	.	.	.	.	.	.	.	D	.	R
1225	AGS40954.1	75		.	.	.	.	.	.	.	.	E	N	A	K	.	.	I	.	A	.	R	.	.	.	.	.	.	.	.	V	.	.	.	.	A	V	S	.	.	.	.	.	.	.	.	D	.	R
1226	AGS41022.1	75		.	.	.	.	.	.	.	.	E	N	A	K	.	.	I	.	A	.	R	.	.	.	.	.	.	.	.	V	.	.	.	.	A	V	S	.	.	.	.	.	.	.	.	D	.	R
1227	AGS40974.1	75		.	.	.	.	.	.	.	.	E	N	A	K	.	.	I	.	A	.	R	.	.	.	.	.	.	.	.	V	.	.	.	.	A	V	S	.	.	.	.	.	.	.	.	D	.	S
1228	AGS40963.1	75		.	.	.	.	.	.	.	.	E	N	A	K	.	.	I	.	A	.	R	.	.	.	.	.	.	.	.	V	.	.	.	.	A	V	S	.	.	K	.	.	.	.	.	D	.	R
1229	AGS40966.1	75		.	.	.	.	.	.	.	.	E	N	A	K	.	.	I	.	A	.	R	.	.	.	.	.	.	.	.	V	.	.	.	.	A	V	S	.	.	.	.	.	.	.	.	D	.	R
1230	AGS41028.1	75		.	.	.	.	.	.	.	.	E	N	A	K	.	.	I	.	A	.	R	.	.	.	.	.	.	.	.	V	.	.	.	.	A	V	S	.	.	.	.	.	.	.	.	D	.	R
1231	AGS40958.1	75		.	.	.	.	.	.	.	.	E	N	A	K	.	.	I	.	A	.	R	.	.	.	.	.	.	.	.	V	.	.	.	.	A	V	S	.	.	.	.	.	.	.	.	D	.	S
1232	AGS40994.1	75		.	.	.	.	.	.	.	.	E	N	A	K	.	.	I	.	A	.	R	.	.	.	.	.	.	.	.	V	.	.	.	.	A	V	S	.	.	.	.	.	.	.	.	D	.	R
1233	KMZ99594.1	75		.	.	.	.	.	.	.	.	E	N	A	K	.	.	I	.	A	.	R	.	.	.	.	.	.	.	.	V	.	.	.	.	A	V	S	.	.	.	.	.	.	.	.	D	.	R
1234	ACY68830.1	75		.	.	.	.	.	.	.	.	E	N	A	K	.	.	I	.	A	.	R	.	.	.	.	.	.	.	.	V	.	.	.	.	A	V	S	.	.	.	.	.	.	.	.	D	.	R
1235	AGS41009.1	75		.	.	.	.	.	.	.	.	E	N	A	K	.	.	I	.	A	.	R	.	.	.	.	.	.	.	.	V	.	.	.	.	A	V	S	.	.	.	.	.	.	.	.	D	.	R
1236	AGS41013.1	75		.	.	.	.	.	.	.	.	E	N	A	K	.	.	I	.	A	.	R	.	.	.	.	.	.	.	.	V	.	.	.	.	A	V	S	.	.	.	.	.	.	.	.	D	.	R
1237	AGS40949.1	75		.	.	.	.	.	.	.	.	E	N	A	K	.	.	I	.	A	.	R	.	.	.	.	.	.	.	.	V	.	.	.	.	A	V	S	.	.	K	.	.	.	.	.	D	.	R
1238	AGS40955.1	75		.	.	.	.	.	.	.	.	E	N	A	K	.	.	I	.	A	.	R	.	.	.	.	.	.	.	.	V	.	.	.	.	A	V	S	.	.	K	.	.	.	.	.	D	.	R
1239	AKC42164.1	75		.	.	.	.	.	.	.	.	E	N	A	R	.	.	I	.	A	.	R	.	.	.	.	.	.	.	.	V	.	.	.	.	A	V	S	.	.	.	.	.	.	.	.	D	.	R
1240	AGS40979.1	75		.	.	.	.	.	.	.	.	E	N	A	K	.	.	I	.	A	.	R	.	.	.	.	.	.	.	.	V	.	.	.	.	A	V	S	.	.	K	.	.	.	.	.	D	.	R
1241	APT35518.1	26		.	.	.	.	.	.	.	.	E	N	A	K	.	.	I	.	A	.	R	.	.	.	.	.	.	.	.	V	.	.	.	.	A	V	S	.	.	.	.	.	.	.	.	D	.	R
1242	CAG9477055.1	75		.	.	.	.	.	.	.	.	E	N	A	K	.	.	I	.	A	.	R	.	.	.	.	.	.	.	.	V	.	.	.	.	A	V	S	.	.	.	.	.	.	.	.	D	.	R
1243	ACY68754.1	75		.	.	.	.	.	.	.	.	E	N	A	K	.	.	I	.	A	.	R	.	.	.	.	.	.	.	.	V	.	.	.	.	A	V	S	.	.	.	.	.	.	.	.	D	.	R
1244	UFQ05857.1	75		.	.	.	.	.	.	.	.	E	N	A	K	.	.	I	.	A	.	R	.	.	.	.	.	.	.	.	V	.	.	.	.	A	V	S	.	.	.	.	.	.	.	.	D	.	R
1245	ACY68871.1	75		.	.	.	.	.	.	.	.	E	N	A	K	.	.	I	.	A	.	R	.	.	.	.	.	.	.	.	V	.	.	.	.	A	V	S	.	.	.	.	.	.	.	.	D	.	R
1246	UFQ05845.1	75		.	.	.	.	.	.	.	.	E	N	A	K	.	.	I	.	A	.	R	.	.	.	.	.	.	.	.	V	.	.	.	.	A	V	S	.	.	.	.	.	.	.	.	D	.	R
1247	AGS41007.1	75		.	.	.	.	.	.	.	.	E	N	A	K	.	.	I	.	A	.	R	.	.	.	.	.	.	.	.	V	.	.	.	.	A	V	S	.	.	K	.	.	.	.	.	D	.	R
1248	APT35557.1	26		.	.	.	.	.	.	.	.	E	N	A	K	.	.	I	.	A	.	R	.	.	.	.	.	.	.	.	V	.	.	.	.	A	V	S	.	.	.	.	.	.	.	.	D	.	K
1249	AGS40939.1	75		.	.	.	.	.	.	.	.	E	N	A	K	.	.	I	.	A	.	R	.	.	.	.	.	.	.	.	V	.	.	.	.	A	V	S	.	.	K	.	.	.	.	.	D	.	R
1250	AGG39606.1	68		.	.	.	.	.	.	.	.	E	N	A	K	.	.	I	.	A	.	R	.	.	.	.	.	.	.	.	V	.	.	.	.	A	V	S	.	.	.	.	.	.	.	.	D	.	R
1251	APT35564.1	26		.	.	.	.	.	.	.	.	E	N	A	K	.	.	I	.	A	.	R	.	.	.	.	.	.	.	.	V	.	.	.	.	A	V	S	.	.	K	.	.	.	.	.	D	.	R
1252	AGS40959.1	75		.	.	.	.	.	.	.	.	E	N	A	K	.	.	I	.	A	.	R	.	.	.	.	.	.	.	.	V	.	.	.	.	A	V	S	.	.	.	.	.	.	.	.	D	.	S
1253	ABM63524.1	75		.	.	.	.	.	.	.	.	E	N	A	K	.	.	I	.	A	.	R	.	.	.	.	.	.	.	.	V	.	.	.	.	A	V	S	.	.	.	.	.	.	.	.	D	.	R
1254	AKQ33082.1	75		.	.	.	.	.	.	.	.	E	N	A	K	.	.	I	.	A	.	R	.	.	.	.	.	.	.	.	V	.	.	.	.	A	V	S	.	.	.	.	.	.	.	.	D	.	R
1255	AZL41024.1	75		.	.	.	.	.	.	.	.	E	N	A	K	.	.	I	.	A	.	R	.	.	.	.	.	.	.	.	V	.	.	.	.	A	V	S	.	.	.	.	.	.	.	.	D	.	R
1256	ACB55391.1	75		.	.	.	.	.	.	.	.	E	N	A	K	.	.	I	.	A	.	R	.	.	.	.	.	.	.	.	V	.	.	.	.	A	V	S	.	.	.	.	.	.	.	.	D	.	R
1257	QEQ12054.1	33		.	.	.	.	.	.	.	.	E	N	A	K	.	.	I	.	A	.	R	.	.	.	.	.	.	.	.	V	.	.	.	.	A	V	S	.	.	.	.	.	.	.	.	D	.	R
1258	AGG39603.1	68		.	.	.	.	.	.	.	.	E	N	A	K	.	.	I	.	A	.	R	.	.	.	.	.	.	.	.	V	.	.	.	.	D	V	S	.	.	.	.	.	.	.	.	D	.	R
1259	ACY68725.1	75		.	.	.	.	.	.	.	.	E	N	A	K	.	.	I	.	A	.	R	.	.	.	.	.	.	.	.	V	.	.	.	.	D	V	S	.	.	.	.	.	.	.	.	D	.	R
1260	QEQ12017.1	33		.	.	.	.	.	.	.	.	E	N	A	K	.	.	I	.	A	.	R	.	.	.	.	.	.	.	.	V	.	.	.	.	A	V	S	.	.	R	.	.	.	.	.	D	.	R
1261	ACY68750.1	75		.	.	.	.	.	.	.	.	E	N	A	K	.	.	I	.	A	.	R	.	.	.	.	.	.	.	.	V	.	.	.	.	D	V	S	.	.	.	.	.	.	.	.	D	.	R
1262	UFQ05820.1	75		.	.	.	.	.	.	.	.	E	N	A	K	.	.	I	.	A	.	R	.	.	.	.	.	.	.	.	V	.	.	.	.	.	V	S	.	.	.	.	.	.	.	.	D	.	R
1263	AGS40950.1	75		.	.	.	.	.	.	.	.	E	N	A	K	.	.	I	.	A	.	R	.	.	.	.	.	.	.	.	V	.	.	.	.	D	V	S	.	.	K	.	.	.	.	.	D	.	S
1264	AGS40956.1	75		.	.	.	.	.	.	.	.	E	N	A	K	.	.	I	.	A	.	R	.	.	.	.	.	.	.	.	V	.	.	.	.	A	V	S	.	.	K	.	.	.	.	.	D	.	S
1265	UFQ05934.1	75		.	.	.	.	.	.	.	.	E	N	A	K	.	.	I	.	A	.	R	.	.	.	.	.	.	.	.	V	.	.	.	.	A	V	S	.	.	.	.	.	.	.	.	D	.	R
1266	AZL41025.1	75		.	.	.	.	.	.	.	.	E	N	A	K	.	.	I	.	A	.	R	.	.	.	.	.	.	.	.	V	.	.	.	.	A	V	S	.	.	.	.	.	.	.	.	D	.	R
1267	QEQ12065.1	33		.	.	.	.	.	.	.	.	E	N	A	K	.	.	I	.	A	.	R	.	.	.	.	.	.	.	.	V	.	.	.	.	A	V	S	.	.	K	.	.	.	.	.	D	.	R
1268	AGS40970.1	75		.	.	.	.	.	.	.	.	E	N	A	K	.	.	I	.	A	.	R	.	.	.	.	.	.	.	.	V	.	.	.	.	A	V	S	.	.	K	.	.	.	.	.	D	.	R
1269	CAA76546.1	33		.	.	.	.	.	.	.	.	E	N	A	K	.	.	I	.	A	.	R	.	.	.	.	.	.	.	.	V	.	.	.	.	D	V	S	.	.	R	.	.	.	.	.	D	.	K
1270	AGS40947.1	75		.	.	.	.	.	.	.	.	E	N	A	K	.	.	I	.	A	.	R	.	.	.	.	.	.	.	.	V	.	.	.	.	A	V	S	.	.	K	.	.	.	.	.	D	.	R
1271	AGS40977.1	75		.	.	.	.	.	.	.	.	E	N	A	K	.	.	I	.	A	.	R	.	.	.	.	.	.	.	.	V	.	.	.	.	A	V	S	.	.	K	.	.	.	.	.	D	.	S
1272	QEQ12025.1	33		.	.	.	.	.	.	.	.	E	N	A	K	.	.	I	.	A	.	R	.	.	.	.	.	.	.	.	V	.	.	.	.	A	V	S	.	.	.	.	.	.	.	.	D	.	R
1273	ACB42434.1	75		.	.	.	.	.	.	.	.	E	N	A	K	.	.	I	.	A	.	R	.	.	.	.	.	.	.	.	V	.	.	.	.	A	V	S	.	.	.	.	.	.	.	.	D	.	R
1274	QEQ11981.1	33		.	.	.	.	.	.	.	.	E	N	A	K	.	.	I	.	A	.	R	.	.	.	.	.	.	.	.	V	.	.	.	.	D	V	S	.	.	K	.	.	.	.	.	D	.	R
1275	AEK49000.1	19		.	.	.	.	.	.	.	.	E	N	A	K	.	.	I	.	A	.	R	.	.	.	.	.	.	.	.	V	.	.	.	.	D	V	S	.	.	K	.	.	.	.	.	D	.	R
1276	AGS40967.1	75		.	.	.	.	.	.	.	.	E	N	A	K	.	.	I	.	A	.	R	.	.	.	.	.	.	.	.	V	.	.	.	.	A	V	S	.	.	K	.	.	.	.	.	D	.	R
1277	AKQ33089.1	75		.	.	.	.	.	.	.	.	E	N	N	K	.	.	I	.	A	.	.	.	.	.	.	.	.	.	.	V	.	.	.	.	D	V	S	.	.	.	.	.	.	.	.	D	.	K
1278	AGS40936.1	75		.	.	.	.	.	.	.	.	E	N	A	K	.	.	I	.	A	.	R	.	.	.	.	.	.	.	.	V	.	.	.	.	A	V	S	.	.	K	.	.	.	.	.	D	.	R
1279	AGS40975.1	75		.	.	.	.	.	.	.	.	E	N	A	K	.	.	I	.	A	.	R	.	.	.	.	.	.	.	.	V	.	.	.	.	A	V	S	.	.	K	.	.	.	.	.	D	.	S
1280	APT35513.1	26		.	.	.	.	.	.	.	.	E	N	A	K	.	.	I	.	A	.	R	.	.	.	.	.	.	.	.	V	.	.	.	.	D	V	S	.	.	K	.	.	.	.	.	D	.	R
1281	AGS41011.1	75		.	.	.	.	.	.	.	.	E	N	A	K	.	.	I	.	A	.	R	.	.	.	.	.	.	.	.	V	.	.	.	.	A	V	S	.	.	K	.	.	.	.	.	D	.	S
1282	APT35548.1	26		.	.	.	.	.	.	.	.	E	N	A	K	.	.	I	.	A	.	R	.	.	.	.	.	.	.	.	V	.	.	.	.	A	V	S	.	.	K	.	.	.	.	.	D	.	R
1283	ACB55332.1	75		.	.	.	.	.	.	.	.	E	N	A	K	.	.	I	.	A	.	R	.	.	.	.	.	.	.	.	V	.	.	.	.	A	V	S	.	.	.	.	.	.	.	.	D	.	R
1284	QEQ12014.1	33		.	.	.	.	.	.	.	.	E	N	A	K	.	.	I	.	A	.	R	.	.	.	.	.	.	.	.	V	.	.	.	.	D	V	S	.	.	K	.	.	.	.	.	D	.	R
1285	APT35528.1	26		.	.	.	.	.	.	.	.	E	N	A	K	.	.	I	.	A	.	R	.	.	.	.	.	.	.	.	V	.	.	.	.	D	V	S	.	.	K	.	.	.	.	.	D	.	R
1286	UFQ05836.1	75		.	.	.	.	.	.	.	.	E	N	A	K	.	.	I	.	A	.	R	.	.	.	.	.	.	.	.	V	.	.	.	.	A	V	S	.	.	.	.	.	.	.	.	D	.	R
1287	ACB42437.1	75		.	.	.	.	.	.	.	.	E	N	A	K	.	.	I	.	A	.	R	.	.	.	.	.	.	.	.	V	.	.	.	.	A	V	S	.	.	.	.	.	.	.	.	D	.	R
1288	QEQ12049.1	33		.	.	.	.	.	.	.	.	E	N	A	K	.	.	I	.	A	.	R	.	.	.	.	.	.	.	.	V	.	.	.	.	D	V	S	.	.	K	.	.	.	.	.	D	.	R
1289	AZL41039.1	75		.	.	.	.	.	.	.	.	E	N	A	K	.	.	I	.	A	.	R	.	.	.	.	.	.	.	.	V	.	.	.	.	A	V	S	.	.	.	.	.	.	.	.	D	.	R
1290	QEQ12026.1	33		.	.	.	.	.	.	.	.	E	N	A	K	.	.	I	.	A	.	R	.	.	.	.	.	.	.	.	V	.	.	.	.	D	V	S	.	.	K	.	.	.	.	.	D	.	R
1291	QEQ11970.1	33		.	.	.	.	.	.	.	.	E	N	A	K	.	.	I	.	A	.	R	.	.	.	.	.	.	.	.	V	.	.	.	.	D	V	S	.	.	K	.	.	.	.	.	D	.	R
1292	CAI7720619.1	75		.	.	.	.	.	.	.	.	E	N	A	K	.	.	I	.	A	.	R	.	.	.	.	.	.	.	.	V	.	.	.	.	A	V	S	.	.	.	.	.	.	.	.	D	.	R
1293	QEQ11992.1	33		.	.	.	.	.	.	.	.	E	N	A	K	.	.	I	.	A	.	R	.	.	.	.	.	.	.	.	V	.	.	.	.	D	V	S	.	.	K	.	.	.	.	.	D	.	R
1294	UFQ05833.1	75		.	.	.	.	.	.	.	.	E	N	A	K	.	.	I	.	A	.	R	.	.	.	.	.	.	.	.	V	.	.	.	.	A	V	S	.	.	.	.	.	.	.	.	D	.	R
1295	AKC42173.1	75		.	.	.	.	.	.	.	.	E	N	A	K	.	.	I	.	A	.	R	.	.	.	.	.	.	.	.	V	.	.	.	.	A	V	S	.	.	R	.	.	.	.	.	D	.	R
1296	AEK49001.1	19		.	.	.	.	.	.	.	.	E	N	A	K	.	.	I	.	A	.	R	.	.	.	.	.	.	.	.	V	.	.	.	.	A	V	S	.	.	.	.	.	.	.	.	D	.	R
1297	QEQ12030.1	33		.	.	.	.	.	.	.	.	E	N	A	K	.	.	I	.	A	.	R	.	.	.	.	.	.	.	.	V	.	.	.	.	A	V	S	.	.	R	.	.	.	.	.	D	.	R
1298	QEQ12050.1	33		.	.	.	.	.	.	.	.	E	N	A	K	.	.	I	.	A	.	R	.	.	.	.	.	.	.	.	V	.	.	.	.	D	V	S	.	.	R	.	.	.	.	.	D	.	R
1299	UFQ05878.1	75		.	.	.	.	.	.	.	.	E	N	A	K	.	.	I	.	A	.	R	.	.	.	.	.	.	.	.	V	.	.	.	.	A	V	S	.	.	.	.	.	.	.	.	D	.	R
1300	AKC42223.1	75		.	.	.	.	.	.	.	.	E	N	A	K	.	.	I	.	A	.	R	.	.	.	.	.	.	.	.	V	.	.	.	.	A	V	S	.	.	R	.	.	.	.	.	D	.	R
1301	AGY92835.1	20		.	.	.	.	.	.	.	.	E	N	A	K	.	.	I	.	A	.	R	.	.	.	.	.	.	.	.	V	.	.	.	.	A	V	S	.	.	.	.	.	.	.	.	D	.	R
1302	AGS40957.1	75		.	.	.	.	.	.	.	.	E	N	A	K	.	.	I	.	A	.	R	.	.	.	.	.	.	.	.	V	.	.	.	.	A	V	S	.	.	K	.	.	.	.	.	D	.	R
1303	AKC42167.1	75		.	.	.	.	.	.	.	.	E	N	A	K	.	.	I	.	A	.	R	.	.	.	.	.	.	.	.	V	.	.	.	.	A	V	S	.	.	R	.	.	.	.	.	D	.	R
1304	AKQ33098.1	71		.	.	.	.	.	.	.	.	G	N	S	N	.	.	I	.	A	.	.	.	.	.	.	.	.	.	.	V	.	.	.	.	Q	V	S	.	.	Q	.	.	.	.	.	.	.	N
1305	UFQ05906.1	75		.	.	.	.	.	.	.	.	E	N	A	K	.	.	I	.	A	.	R	.	.	.	.	.	.	.	.	V	.	.	.	.	A	V	S	.	.	.	.	.	.	.	.	D	.	R
1306	ACY68759.1	75		.	.	.	.	.	.	.	.	E	N	A	K	.	.	I	.	A	.	R	.	.	.	.	.	.	.	.	V	.	.	.	.	A	V	S	.	.	.	.	.	.	.	.	D	.	R
1307	AKC42169.1	75		.	.	.	.	.	.	.	.	E	N	A	K	.	.	I	.	A	.	R	.	.	.	.	.	.	.	.	V	.	.	.	.	A	V	S	.	.	R	.	.	.	.	.	D	.	R
1308	ANS58321.1	75		.	.	.	.	.	.	.	.	E	N	A	K	.	.	I	.	A	.	R	.	.	.	.	.	.	.	.	V	.	.	.	.	A	V	S	.	.	R	.	.	.	.	.	D	.	R
1309	APT35526.1	26		.	.	.	.	.	.	.	.	E	N	A	K	.	.	I	.	A	.	R	.	.	.	.	.	.	.	.	V	.	.	.	.	A	V	S	.	.	K	.	.	.	.	.	D	.	R
1310	ADD39009.1	74		.	.	.	.	.	.	.	.	E	N	A	K	.	.	I	.	A	.	R	.	.	.	.	.	.	.	.	V	.	.	.	.	A	V	S	.	.	R	.	.	.	.	.	D	.	R
1311	AAA29480.1	75		.	.	.	.	.	.	.	.	E	N	A	K	.	.	I	.	A	.	R	.	.	.	.	.	.	.	.	V	.	.	.	.	D	V	S	.	.	.	.	.	.	.	.	D	.	R
1312	AKQ33088.1	75		.	.	.	.	.	.	.	.	E	N	S	K	.	.	I	.	A	.	.	.	.	.	.	.	.	.	.	V	.	.	.	.	E	V	S	.	.	.	.	.	.	.	.	D	.	K
1313	AKC42218.1	75		.	.	.	.	.	.	.	.	E	N	A	K	.	.	I	.	A	.	R	.	.	.	.	.	.	.	.	V	.	.	.	.	A	V	S	.	.	R	.	.	.	.	.	D	.	R
1314	AKC42185.1	75		.	.	.	.	.	.	.	.	E	N	A	K	.	.	I	.	A	.	R	.	.	.	.	.	.	.	.	V	.	.	.	.	A	V	S	.	.	R	.	.	.	.	.	D	.	R
1315	AEK48999.1	19		.	.	.	.	.	.	.	.	E	N	A	K	.	.	I	.	A	.	R	.	.	.	.	.	.	.	.	V	.	.	.	.	D	V	S	.	.	K	.	.	.	.	.	D	.	R
1316	UFQ05864.1	75		.	.	.	.	.	.	.	.	E	N	A	K	.	.	I	.	A	.	R	.	.	.	.	.	.	.	.	V	.	.	.	.	D	V	S	.	.	.	.	.	.	.	.	D	.	R
1317	AKC42170.1	75		.	.	.	.	.	.	.	.	E	N	A	K	.	.	I	.	A	.	R	.	.	.	.	.	.	.	.	V	.	.	.	.	A	V	S	.	.	R	.	.	.	.	.	D	.	R
1318	ACY68753.1	75		.	.	.	.	.	.	.	.	E	N	A	K	.	.	I	.	A	.	R	.	.	.	.	.	.	.	.	V	.	.	.	.	A	V	S	.	.	.	.	.	.	.	.	D	.	R
1319	AGG39611.1	68		.	.	.	.	.	.	.	.	E	N	A	K	.	.	I	.	A	.	R	.	.	.	.	.	.	.	.	V	.	.	.	.	A	V	S	.	.	.	.	.	.	.	.	D	.	R
1320	AKQ33093.1	75		.	.	.	.	.	.	.	.	G	N	S	N	.	.	I	.	A	.	.	.	.	.	.	.	.	.	.	V	.	.	.	.	Q	V	S	.	.	Q	.	.	.	.	.	.	.	N
1321	ANS58336.1	75		.	.	.	.	.	.	.	.	E	N	A	K	.	.	I	.	A	.	R	.	.	.	.	.	.	.	.	V	.	.	.	.	A	V	S	.	.	R	.	.	.	.	.	D	.	R
1322	ACY68808.1	75		.	.	.	.	.	.	.	.	E	N	A	K	.	.	I	.	A	.	R	.	.	.	.	.	.	.	.	V	.	.	.	.	A	V	S	.	.	.	.	.	.	.	.	D	.	R
1323	ACY68761.1	75		.	.	.	.	.	.	.	.	E	N	A	K	.	.	I	.	A	.	R	.	.	.	.	.	.	.	.	V	.	.	.	.	A	V	S	.	.	.	.	.	.	.	.	D	.	R
1324	AKC42163.1	75		.	.	.	.	.	.	.	.	E	N	A	K	.	.	I	.	A	.	R	.	.	.	.	.	.	.	.	V	.	.	.	.	A	V	S	.	.	.	.	.	.	.	.	D	.	R
1325	QEQ11990.1	33		.	.	.	.	.	.	.	.	E	N	A	K	.	.	I	.	A	.	R	.	.	.	.	.	.	.	.	V	.	.	.	.	D	V	S	.	.	K	.	.	.	.	.	D	.	R
1326	UFQ05819.1	75		.	.	.	.	.	.	.	.	E	N	A	K	.	.	I	.	A	.	R	.	.	.	.	.	.	.	.	V	.	.	.	.	A	V	S	.	.	.	.	.	.	.	.	D	.	R
1327	ACY68788.1	75		.	.	.	.	.	.	.	.	E	N	A	K	.	.	I	.	A	.	R	.	.	.	.	.	.	.	.	V	.	.	.	.	.	V	S	.	.	K	.	.	.	.	.	D	.	R
1328	AKC42165.1	75		.	.	.	.	.	.	.	.	E	N	A	K	.	.	I	.	A	.	R	.	.	.	.	.	.	.	.	V	.	.	.	.	A	V	S	.	.	.	.	.	.	.	.	D	.	R
1329	AKC42166.1	75		.	.	.	.	.	.	.	.	E	N	A	K	.	.	I	.	A	.	R	.	.	.	.	.	.	.	.	V	.	.	.	.	A	V	S	.	.	R	.	.	.	.	.	D	.	R
1330	AKC42208.1	75		.	.	.	.	.	.	.	.	E	N	A	K	.	.	I	.	A	.	R	.	.	.	.	.	.	.	.	V	.	.	.	.	A	V	S	.	.	.	.	.	.	.	.	D	.	R
1331	ACY68738.1	75		.	.	.	.	.	.	.	.	E	N	A	K	.	.	I	.	A	.	R	.	.	.	.	.	.	.	.	V	.	.	.	.	A	V	S	.	.	.	.	.	.	.	.	D	.	R
1332	AKC42203.1	75		.	.	.	.	.	.	.	.	E	N	A	K	.	.	I	.	A	.	R	.	.	.	.	.	.	.	.	V	.	.	.	.	A	V	S	.	.	.	.	.	.	.	.	D	.	R
1333	ACY68779.1	75		.	.	.	.	.	.	.	.	E	N	A	K	.	.	I	.	A	.	R	.	.	.	.	.	.	.	.	V	.	.	.	.	A	V	S	.	.	.	.	.	.	.	.	D	.	R
1334	AKC42207.1	75		.	.	.	.	.	.	.	.	E	N	A	K	.	.	I	.	A	.	R	.	.	.	.	.	.	.	.	V	.	.	.	.	A	V	S	.	.	.	.	.	.	.	.	D	.	R
1335	UFQ05877.1	75		.	.	.	.	.	.	.	.	E	N	A	K	.	.	I	.	A	.	R	.	.	.	.	.	.	.	.	V	.	.	.	.	A	V	S	.	.	.	.	.	.	.	.	D	.	R
1336	ACY68837.1	75		.	.	.	.	.	.	.	.	E	N	A	K	.	.	I	.	A	.	R	.	.	.	.	.	.	.	.	V	.	.	.	.	D	V	S	.	.	.	.	.	.	.	.	D	.	R
1337	AEK48997.1	19		.	.	.	.	.	.	.	.	E	N	A	K	.	.	I	.	A	.	R	.	.	.	.	.	.	.	.	V	.	.	.	.	A	V	S	.	.	.	.	.	.	.	.	D	.	R
1338	APT35524.1	26		.	.	.	.	.	.	.	.	E	N	A	K	.	.	I	.	A	.	R	.	.	.	.	.	.	.	.	V	.	.	.	.	D	V	S	.	.	K	.	.	.	.	.	D	.	R
1339	AGS41015.1	75		.	.	.	.	.	.	.	.	E	N	A	K	.	.	I	.	A	.	R	.	.	.	.	.	.	.	.	V	.	.	.	.	A	V	S	.	.	K	.	.	.	.	.	D	.	R
1340	ACY68881.1	75		.	.	.	.	.	.	.	.	E	N	A	K	.	.	I	.	A	.	R	.	.	.	.	.	.	.	.	V	.	.	.	.	D	V	S	.	.	.	.	.	.	.	.	D	.	R
1341	UFQ05868.1	75		.	.	.	.	.	.	.	.	E	N	A	K	.	.	I	.	A	.	R	.	.	.	.	.	.	.	.	V	.	.	.	.	A	V	S	.	.	.	.	.	.	.	.	D	.	K
1342	QEQ12023.1	33		.	.	.	.	.	.	.	.	E	N	A	K	.	.	I	.	A	.	R	.	.	.	.	.	.	.	.	V	.	.	.	.	A	V	S	.	.	.	.	.	.	.	.	D	.	R
1343	AGS40968.1	75		.	.	.	.	.	.	.	.	E	N	A	K	.	.	I	.	A	.	R	.	.	.	.	.	.	.	.	V	.	.	.	.	D	V	S	.	.	K	.	.	.	.	.	D	.	S
1344	ACY68795.1	75		.	.	.	.	.	.	.	.	E	N	A	K	.	.	I	.	A	.	R	.	.	.	.	.	.	.	.	V	.	.	.	.	D	V	S	.	.	.	.	.	.	.	.	D	.	R
1345	APT35537.1	26		.	.	.	.	.	.	.	.	E	N	A	K	.	.	I	.	A	.	R	.	.	.	.	.	.	.	.	V	.	.	.	.	D	V	S	.	.	K	.	.	.	.	.	D	.	R
1346	AGS41004.1	75		.	.	.	.	.	.	.	.	E	N	A	K	.	.	I	.	A	.	R	.	.	.	.	.	.	.	.	V	.	.	.	.	D	V	S	.	.	K	.	.	.	.	.	D	.	S
1347	AGS40953.1	75		.	.	.	.	.	.	.	.	E	N	A	K	.	.	I	.	A	.	R	.	.	.	.	.	.	.	.	V	.	.	.	.	D	V	S	.	.	K	.	.	.	.	.	D	.	S
1348	AGS41000.1	75		.	.	.	.	.	.	.	.	E	N	A	K	.	.	I	.	A	.	R	.	.	.	.	.	.	.	.	V	.	.	.	.	D	V	S	.	.	K	.	.	.	.	.	D	.	S
1349	APT35529.1	26		.	.	.	.	.	.	.	.	E	N	A	K	.	.	I	.	A	.	R	.	.	.	.	.	.	.	.	V	.	.	.	.	D	V	S	.	.	K	.	.	.	.	.	D	.	R
1350	APT35545.1	26		.	.	.	.	.	.	.	.	E	N	A	K	.	.	I	.	A	.	R	.	.	.	.	.	.	.	.	V	.	.	.	.	D	V	S	.	.	K	.	.	.	.	.	D	.	R
1351	ACB42439.1	75		.	.	.	.	.	.	.	.	E	N	A	K	.	.	I	.	A	.	R	.	.	.	.	.	.	.	.	V	.	.	.	.	D	V	S	.	.	K	.	.	.	.	.	D	.	R
1352	ACY68781.1	75		.	.	.	.	.	.	.	.	E	N	A	K	.	.	I	.	A	.	R	.	.	.	.	.	.	.	.	V	.	.	.	.	A	V	S	.	.	K	.	.	.	.	.	D	.	R
1353	XP_008816151.1	75		.	.	.	.	.	.	.	.	G	N	S	N	.	.	I	.	A	.	.	.	.	.	.	.	.	.	.	V	.	.	.	.	Q	V	S	.	.	Q	.	.	.	.	.	.	.	N
1354	QEQ12046.1	33		.	.	.	.	.	.	.	.	E	N	A	K	.	.	I	.	A	.	R	.	.	.	.	.	.	.	.	V	.	.	.	.	D	V	S	.	.	K	.	.	.	.	.	D	.	R
1355	ACB55383.1	75		.	.	.	.	.	.	.	.	E	N	A	K	.	.	I	.	A	.	R	.	.	.	.	.	.	.	.	V	.	.	.	.	D	V	S	.	.	.	.	.	.	.	.	D	.	R
1356	QEQ11996.1	33		.	.	.	.	.	.	.	.	E	N	A	K	.	.	I	.	A	.	R	.	.	.	.	.	.	.	.	V	.	.	.	.	A	V	S	.	.	K	.	.	.	.	.	D	.	R
1357	APT35532.1	26		.	.	.	.	.	.	.	.	E	N	A	K	.	.	I	.	A	.	R	.	.	.	.	.	.	.	.	V	.	.	.	.	D	V	S	.	.	K	.	.	.	.	.	D	.	R
1358	APT35515.1	26		.	.	.	.	.	.	.	.	E	N	A	K	.	.	I	.	A	.	R	.	.	.	.	.	.	.	.	V	.	.	.	.	A	V	S	.	.	K	.	.	.	.	.	D	.	R
1359	QEQ11966.1	33		.	.	.	.	.	.	.	.	E	N	A	K	.	.	I	.	A	.	R	.	.	.	.	.	.	.	.	V	.	.	.	.	D	V	S	.	.	K	.	.	.	.	.	D	.	R
1360	ACY68782.1	75		.	.	.	.	.	.	.	.	E	N	A	K	.	.	I	.	A	.	R	.	.	.	.	.	.	.	.	V	.	.	.	.	A	V	S	.	.	.	.	.	.	.	.	D	.	R
1361	APT35549.1	26		.	.	.	.	.	.	.	.	E	N	A	K	.	.	I	.	A	.	R	.	.	.	.	.	.	.	.	V	.	.	.	.	D	V	S	.	.	K	.	.	.	.	.	D	.	R
1362	AGG39614.1	68		.	.	.	.	.	.	.	.	E	N	A	K	.	.	I	.	A	.	R	.	.	.	.	.	.	.	.	V	.	.	.	.	A	V	S	.	.	.	.	.	.	.	.	D	.	R
1363	UFQ05822.1	75		.	.	.	.	.	.	.	.	E	N	A	K	.	.	I	.	A	.	R	.	.	.	.	.	.	.	.	V	.	.	.	.	.	V	S	.	.	K	.	.	.	.	.	D	.	R
1364	ABN11189.1	75		.	.	.	.	.	.	.	.	E	N	A	K	.	.	I	.	A	.	R	.	.	.	.	.	.	.	.	V	.	.	.	.	D	V	S	.	.	K	.	.	.	.	.	D	.	R
1365	AGG39612.1	68		.	.	.	.	.	.	.	.	E	N	A	K	.	.	I	.	A	.	R	.	.	.	.	.	.	.	.	V	.	.	.	.	A	V	S	.	.	R	.	.	.	.	.	D	.	R
1366	ABN11186.1	75		.	.	.	.	.	.	.	.	E	N	A	K	.	.	I	.	A	.	R	.	.	.	.	.	.	.	.	V	.	.	.	.	D	V	S	.	.	K	.	.	.	.	.	D	.	R
1367	APT35517.1	26		.	.	.	.	.	.	.	.	E	N	A	K	.	.	I	.	A	.	R	.	.	.	.	.	.	.	.	V	.	.	.	.	D	V	S	.	.	K	.	.	.	.	.	D	.	R
1368	QEQ12021.1	33		.	.	.	.	.	.	.	.	E	N	A	K	.	.	I	.	A	.	R	.	.	.	.	.	.	.	.	V	.	.	.	.	D	V	S	.	.	K	.	.	.	.	.	D	.	R
1369	QEQ12047.1	33		.	.	.	.	.	.	.	.	E	N	A	K	.	.	I	.	A	.	R	.	.	.	.	.	.	.	.	V	.	.	.	.	D	V	S	.	.	K	.	.	.	.	.	D	.	R
1370	ABN11197.1	75		.	.	.	.	.	.	.	.	E	N	A	K	.	.	I	.	A	.	R	.	.	.	.	.	.	.	.	V	.	.	.	.	D	V	S	.	.	K	.	.	.	.	.	D	.	R
1371	UFQ05795.1	75		.	.	.	.	.	.	.	.	E	N	A	K	.	.	I	.	A	.	R	.	.	.	.	.	.	.	.	V	.	.	.	.	A	V	S	.	.	.	.	.	.	.	.	D	.	R
1372	QEQ12001.1	33		.	.	.	.	.	.	.	.	E	N	A	K	.	.	I	.	A	.	R	.	.	.	.	.	.	.	.	V	.	.	.	.	D	V	S	.	.	K	.	.	.	.	.	D	.	R
1373	QEQ12005.1	33		.	.	.	.	.	.	.	.	E	N	A	K	.	.	I	.	A	.	R	.	.	.	.	.	.	.	.	V	.	.	.	.	A	V	S	.	.	K	.	.	.	.	.	D	.	R
1374	ABN11183.1	75		.	.	.	.	.	.	.	.	E	N	A	K	.	.	I	.	A	.	R	.	.	.	.	.	.	.	.	V	.	.	.	.	A	V	S	.	.	.	.	.	.	.	.	D	.	R
1375	AGG39622.1	68		.	.	.	.	.	.	.	.	E	N	A	K	.	.	I	.	A	.	R	.	.	.	.	.	.	.	.	V	.	.	.	.	D	V	S	.	.	R	.	.	.	.	.	D	.	K
1376	QEQ12010.1	33		.	.	.	.	.	.	.	.	E	N	A	K	.	.	I	.	A	.	R	.	.	.	.	.	.	.	.	V	.	.	.	.	D	V	S	.	.	K	.	.	.	.	.	D	.	R
1377	QEQ11998.1	33		.	.	.	.	.	.	.	.	E	N	A	K	.	.	I	.	A	.	R	.	.	.	.	.	.	.	.	V	.	.	.	.	A	V	S	.	.	R	.	.	.	.	.	D	.	R
1378	QEQ11989.1	33		.	.	.	.	.	.	.	.	E	N	A	K	.	.	I	.	A	.	R	.	.	.	.	.	.	.	.	V	.	.	.	.	A	V	S	.	.	K	.	.	.	.	.	D	.	R
1379	QEQ12004.1	33		.	.	.	.	.	.	.	.	E	N	A	K	.	.	I	.	A	.	R	.	.	.	.	.	.	.	.	V	.	.	.	.	A	V	S	.	.	K	.	.	.	.	.	D	.	R
1380	QEQ11974.1	33		.	.	.	.	.	.	.	.	E	N	A	K	.	.	I	.	A	.	R	.	.	.	.	.	.	.	.	V	.	.	.	.	D	V	S	.	.	K	.	.	.	.	.	D	.	R
1381	ANS58324.1	75		.	.	.	.	.	.	.	.	E	N	A	K	.	.	I	.	A	.	R	.	.	.	.	.	.	.	.	V	.	.	.	.	A	V	S	.	.	R	.	.	.	.	.	D	.	R
1382	ABN11187.1	75		.	.	.	.	.	.	.	.	E	N	A	K	.	.	I	.	A	.	R	.	.	.	.	.	.	.	.	V	.	.	.	.	D	V	S	.	.	K	.	.	.	.	.	D	.	R
1383	ACY68736.1	75		.	.	.	.	.	.	.	.	E	N	A	K	.	.	I	.	A	.	R	.	.	.	.	.	.	.	.	V	.	.	.	.	A	V	S	.	.	.	.	.	.	.	.	D	.	R
1384	UFQ05839.1	75		.	.	.	.	.	.	.	.	E	N	A	K	.	.	I	.	A	.	R	.	.	.	.	.	.	.	.	V	.	.	.	.	A	V	S	.	.	.	.	.	.	.	.	D	.	R
1385	ACY68850.1	75		.	.	.	.	.	.	.	.	E	N	A	K	.	.	I	.	A	.	R	.	.	.	.	.	.	.	.	V	.	.	.	.	A	V	S	.	.	.	.	.	.	.	.	D	.	R
1386	AGG39621.1	68		.	.	.	.	.	.	.	.	E	N	A	K	.	.	I	.	A	.	R	.	.	.	.	.	.	.	.	V	.	.	.	.	D	V	S	.	.	.	.	.	.	.	.	D	.	R
1387	QEQ12062.1	33		.	.	.	.	.	.	.	.	E	N	A	K	.	.	I	.	A	.	R	.	.	.	.	.	.	.	.	V	.	.	.	.	A	V	S	.	.	K	.	.	.	.	.	D	.	R
1388	AUR33962.1	57	Plasmodium Malariae	.	.	.	.	.	.	.	.	K	N	S	K	.	.	I	.	G	.	.	.	.	.	.	.	.	.	.	.	.	.	.	.	.	V	N	.	.	.	.	.	.	.	.	Y	R	N
1389	KAI4838454.1	74	Plasmodium brasilianum	.	.	.	.	.	.	.	.	K	N	S	K	.	.	I	.	G	.	.	.	.	.	.	.	.	.	.	.	.	.	.	.	.	V	G	.	.	.	.	.	.	.	.	Y	R	N
1390	UFQ05873.1	75		.	.	.	.	.	.	.	.	E	N	A	K	.	.	I	.	A	.	R	.	.	.	.	.	.	.	.	V	.	.	.	.	A	V	S	.	.	K	.	.	.	.	.	D	.	R
1391	ANS58332.1	75		.	.	.	.	.	.	.	.	E	N	A	K	.	.	I	.	A	.	R	.	.	.	.	.	.	.	.	V	.	.	.	.	A	V	S	.	.	.	.	.	.	.	.	D	.	G
1392	AGG39619.1	68		.	.	.	.	.	.	.	.	E	N	A	K	.	.	I	.	A	.	R	.	.	.	.	.	.	.	.	V	.	.	.	.	D	V	S	.	.	K	.	.	.	.	.	D	.	R
1393	ACY68744.1	75		.	.	.	.	.	.	.	.	E	N	A	K	.	.	I	.	A	.	R	.	.	.	.	.	.	.	.	V	.	.	.	.	A	V	S	.	.	.	.	.	.	.	.	D	.	R
1394	ACY68799.1	75		.	.	.	.	.	.	.	.	E	N	A	K	.	.	I	.	A	.	R	.	.	.	.	.	.	.	.	V	.	.	.	.	A	V	S	.	.	.	.	.	.	.	.	D	.	R
1395	ACY68751.1	75		.	.	.	.	.	.	.	.	E	N	A	K	.	.	I	.	A	.	R	.	.	.	.	.	.	.	.	V	.	.	.	.	D	V	S	.	.	K	.	.	.	.	.	D	.	R
1396	ANS58327.1	75		.	.	.	.	.	.	.	.	E	N	A	K	.	.	I	.	A	.	R	.	.	.	.	.	.	.	.	V	.	.	.	.	A	V	S	.	.	R	.	.	.	.	.	D	.	R
1397	AKC42184.1	75		.	.	.	.	.	.	.	.	E	N	A	K	.	.	I	.	A	.	R	.	.	.	.	.	.	.	.	V	.	.	.	.	A	V	S	.	.	R	.	.	.	.	.	D	.	R
1398	AGG39623.1	68		.	.	.	.	.	.	.	.	E	N	A	K	.	.	I	.	A	.	R	.	.	.	.	.	.	.	.	V	.	.	.	.	D	V	S	.	.	K	.	.	.	.	.	D	.	R
1399	AGG39599.1	68		.	.	.	.	.	.	.	.	E	N	A	K	.	.	I	.	A	.	R	.	.	.	.	.	.	.	.	V	.	.	.	.	D	V	S	.	.	K	.	.	.	.	.	D	.	R
1400	AGS40995.1	75		.	.	.	.	.	.	.	.	E	N	A	K	.	.	I	.	A	.	R	.	.	.	.	.	.	.	.	V	.	.	.	.	A	V	S	.	.	K	.	.	.	.	.	D	.	R
1401	QEQ11988.1	33		.	.	.	.	.	.	.	.	E	N	A	K	.	.	I	.	A	.	R	.	.	.	.	.	.	.	.	V	.	.	.	.	A	V	S	.	.	R	.	.	.	.	.	D	.	R
1402	UFQ05928.1	75		.	.	.	.	.	.	.	.	E	N	A	K	.	.	I	.	A	.	R	.	.	.	.	.	.	.	.	V	.	.	.	.	A	V	S	.	.	K	.	.	.	.	.	D	.	R
1403	ACY68771.1	75		.	.	.	.	.	.	.	.	E	N	A	K	.	.	I	.	A	.	R	.	.	.	.	.	.	.	.	V	.	.	.	.	A	V	S	.	.	.	.	.	.	.	.	D	.	R
1404	AGS41001.1	75		.	.	.	.	.	.	.	.	E	N	A	K	.	.	I	.	A	.	R	.	.	.	.	.	.	.	.	V	.	.	.	.	A	V	S	.	.	K	.	.	.	.	.	D	.	R
1405	ABN11198.1	75		.	.	.	.	.	.	.	.	E	N	A	K	.	.	I	.	A	.	R	.	.	.	.	.	.	.	.	V	.	.	.	.	D	V	S	.	.	K	.	.	.	.	.	D	.	R
1406	AEK48996.1	19	Plasmodium vivax DAN1	.	.	.	.	.	.	.	.	E	N	A	K	.	.	I	.	A	.	R	.	.	.	.	.	.	.	.	V	.	.	.	.	A	V	S	.	.	.	.	.	.	.	.	D	H	R
1407	AKQ33081.1	75		.	.	.	.	.	.	.	.	E	N	A	K	.	.	I	.	A	.	R	.	.	.	.	.	.	.	.	V	.	.	.	.	A	V	S	.	.	.	.	.	.	.	.	D	.	R
1408	AGG39598.1	68		.	.	.	.	.	.	.	.	E	N	A	K	.	.	I	.	A	.	R	.	.	.	.	.	.	.	.	V	.	.	.	.	D	V	S	.	.	K	.	.	.	.	.	D	.	R
1409	AGS40964.1	75		.	.	.	.	.	.	.	.	E	N	A	K	.	.	I	.	A	.	R	.	.	.	.	.	.	.	.	V	.	.	.	.	A	V	S	.	.	K	.	.	.	.	.	D	.	R
1410	QEQ11968.1	33		.	.	.	.	.	.	.	.	E	N	A	K	.	.	I	.	A	.	R	.	.	.	.	.	.	.	.	V	.	.	.	.	A	V	S	.	.	K	.	.	.	.	.	D	.	R
1411	ACY68774.1	75		.	.	.	.	.	.	.	.	E	N	A	K	.	.	I	.	A	.	R	.	.	.	.	.	.	.	.	V	.	.	.	.	A	V	S	.	.	.	.	.	.	.	.	D	.	R
1412	AGS40981.1	75		.	.	.	.	.	.	.	.	E	N	A	K	.	.	I	.	A	.	R	.	.	.	.	.	.	.	.	V	.	.	.	.	A	V	S	.	.	K	.	.	.	.	.	D	.	R
1413	AGS41006.1	75		.	.	.	.	.	.	.	.	E	N	A	K	.	.	I	.	A	.	R	.	.	.	.	.	.	.	.	V	.	.	.	.	A	V	S	.	.	K	.	.	.	.	.	D	.	R
1414	AGS40999.1	75		.	.	.	.	.	.	.	.	E	N	A	K	.	.	I	.	A	.	R	.	.	.	.	.	.	.	.	V	.	.	.	.	A	V	S	.	.	K	.	.	.	.	.	D	.	S
1415	UFQ05810.1	75		.	.	.	.	.	.	.	.	E	N	A	K	.	.	I	.	A	.	R	.	.	.	.	.	.	.	.	V	.	.	.	.	D	V	S	.	.	.	.	.	.	.	.	D	.	R
1416	AGS41017.1	75		.	.	.	.	.	.	.	.	E	N	A	K	.	.	I	.	A	.	R	.	.	.	.	.	.	.	.	V	.	.	.	.	A	V	S	.	.	K	.	.	.	.	.	D	.	R
1417	APT35576.1	26		.	.	.	.	.	.	.	.	E	N	A	K	.	.	I	.	A	.	R	.	.	.	.	.	.	.	.	V	.	.	.	.	A	V	S	.	.	K	.	.	.	.	.	D	.	R
1418	AUR33957.1	57	Plasmodium Malariae	.	.	.	.	.	.	.	.	K	N	S	K	.	.	I	.	G	.	.	.	.	.	.	.	.	.	.	.	.	.	.	.	.	V	G	.	.	.	.	.	.	.	.	Y	K	N
1419	AGS40972.1	75		.	.	.	.	.	.	.	.	E	N	A	K	.	.	I	.	A	.	R	.	.	.	.	.	.	.	.	V	.	.	.	.	A	V	S	.	.	K	.	.	.	.	.	D	.	R
1420	AUR33956.1	57	Plasmodium Malariae	.	.	.	.	.	.	.	.	K	N	S	K	.	.	I	.	G	.	.	.	.	.	.	.	.	.	.	.	.	.	.	.	.	V	G	.	.	.	.	.	.	.	.	Y	K	N
1421	AGS40965.1	75		.	.	.	.	.	.	.	.	E	N	A	K	.	.	I	.	A	.	R	.	.	.	.	.	.	.	.	V	.	.	.	.	A	V	S	.	.	K	.	.	.	.	.	D	.	R
1422	AUR33965.1	57	Plasmodium Malariae	.	.	.	.	.	.	.	.	K	N	S	K	.	.	I	.	G	.	.	.	.	.	.	.	.	.	.	.	.	.	.	.	.	V	D	.	.	.	.	.	.	.	.	Y	R	N
1423	AUR33963.1	57	Plasmodium Malariae	.	.	.	.	.	.	.	.	K	N	S	K	.	.	I	.	G	.	.	.	.	.	.	.	.	.	.	.	.	.	.	.	.	V	G	.	.	.	.	.	.	.	.	Y	R	N
1424	AGS40990.1	75		.	.	.	.	.	.	.	.	E	N	A	K	.	.	I	.	A	.	R	.	.	.	.	.	.	.	.	V	.	.	.	.	A	V	S	.	.	.	.	.	.	.	.	D	.	R
1425	AUR33964.1	57	Plasmodium Malariae	.	.	.	.	.	.	.	.	K	N	S	K	.	.	I	.	G	.	.	.	.	.	.	.	.	.	.	.	.	.	.	.	.	V	G	.	.	.	.	.	.	.	.	Y	R	N
1426	APT35536.1	26		.	.	.	.	.	.	.	.	E	N	A	K	.	.	I	.	A	.	R	.	.	.	.	.	.	.	.	V	.	.	.	.	A	V	S	.	.	K	.	.	.	.	.	D	.	R
1427	APT35534.1	26		.	.	.	.	.	.	.	.	E	N	A	K	.	.	I	.	A	.	R	.	.	.	.	.	.	.	.	V	.	.	.	.	A	V	S	.	.	K	.	.	.	.	.	D	.	R
1428	AGS40996.1	75		.	.	.	.	.	.	.	.	E	N	A	K	.	.	I	.	A	.	R	.	.	.	.	.	.	.	.	V	.	.	.	.	A	V	S	.	.	.	.	.	.	.	.	D	.	R
1429	AGS41005.1	75		.	.	.	.	.	.	.	.	E	N	A	K	.	.	I	.	A	.	R	.	.	.	.	.	.	.	.	V	.	.	.	.	A	V	S	.	.	.	.	.	.	.	.	D	.	R
1430	AGS40984.1	75		.	.	.	.	.	.	.	.	E	N	A	K	.	.	I	.	A	.	R	.	.	.	.	.	.	.	.	V	.	.	.	.	A	V	S	.	.	.	.	.	.	.	.	D	.	R
1431	AGS40943.1	75		.	.	.	.	.	.	.	.	E	N	A	K	.	.	I	.	A	.	R	.	.	.	.	.	.	.	.	V	.	.	.	.	A	V	S	.	.	.	.	.	.	.	.	D	.	R
1432	AGS40946.1	75		.	.	.	.	.	.	.	.	E	N	A	K	.	.	I	.	A	.	R	.	.	.	.	.	.	.	.	V	.	.	.	.	A	V	S	.	.	.	.	.	.	.	.	D	.	R
1433	AGG39624.1	68		.	.	.	.	.	.	.	.	E	N	A	K	.	.	I	.	A	.	R	.	.	.	.	.	.	.	.	V	.	.	.	.	A	V	S	.	.	.	.	.	.	.	.	D	.	R
1434	AGS40937.1	75		.	.	.	.	.	.	.	.	E	N	A	K	.	.	I	.	A	.	R	.	.	.	.	.	.	.	.	V	.	.	.	.	A	V	S	.	.	.	.	.	.	.	.	D	.	R
1435	ABN11185.1	75		.	.	.	.	.	.	.	.	E	N	A	K	.	.	I	.	A	.	R	.	.	.	.	.	.	.	.	V	.	.	.	.	D	V	S	.	.	K	.	.	.	.	.	D	.	R
1436	ACY68726.1	75		.	.	.	.	.	.	.	.	E	N	A	K	.	.	I	.	A	.	R	.	.	.	.	.	.	.	.	V	.	.	.	.	A	V	S	.	.	.	.	.	.	.	.	D	.	R
1437	AGS40985.1	75		.	.	.	.	.	.	.	.	E	N	A	K	.	.	I	.	A	.	R	.	.	.	.	.	.	.	.	V	.	.	.	.	A	V	S	.	.	.	.	.	.	.	.	D	.	R
1438	AKC42171.1	75		.	.	.	.	.	.	.	.	E	N	A	K	.	.	I	.	A	.	R	.	.	.	.	.	.	.	.	V	.	.	.	.	A	V	S	.	.	R	.	.	.	.	.	D	.	R
1439	AGS40998.1	75		.	.	.	.	.	.	.	.	E	N	A	K	.	.	I	.	A	.	R	.	.	.	.	.	.	.	.	V	.	.	.	.	A	V	S	.	.	.	.	.	.	.	.	D	.	R
1440	AKQ33095.1	75		.	.	.	.	.	.	.	.	G	N	S	N	.	.	I	.	A	.	.	.	.	.	.	.	.	.	.	V	.	.	.	.	Q	V	S	.	.	K	.	.	.	.	.	.	.	N
1441	AGS41018.1	75		.	.	.	.	.	.	.	.	E	N	A	K	.	.	I	.	A	.	R	.	.	.	.	.	.	.	.	V	.	.	.	.	A	V	S	.	.	.	.	.	.	.	.	D	.	R
1442	AGG39608.1	68		.	.	.	.	.	.	.	.	E	N	A	K	.	.	I	.	A	.	R	.	.	.	.	.	.	.	.	V	.	.	.	.	D	V	S	.	.	K	.	.	.	.	.	D	.	R
1443	AGS40982.1	75		.	.	.	.	.	.	.	.	E	N	A	K	.	.	I	.	A	.	R	.	.	.	.	.	.	.	.	V	.	.	.	.	A	V	S	.	.	K	.	.	.	.	.	D	.	S
1444	ANS58328.1	75		.	.	.	.	.	.	.	.	E	N	A	K	.	.	I	.	A	.	R	.	.	.	.	.	.	.	.	V	.	.	.	.	A	V	S	.	.	R	.	.	.	.	.	D	.	R
1445	AGS40978.1	75		.	.	.	.	.	.	.	.	E	N	A	K	.	.	I	.	A	.	R	.	.	.	.	.	.	.	.	V	.	.	.	.	A	V	S	.	.	.	.	.	.	.	.	D	.	S
1446	ACY68778.1	75		.	.	.	.	.	.	.	.	E	N	A	K	.	.	I	.	A	.	R	.	.	.	.	.	.	.	.	V	.	.	.	.	A	V	S	.	.	.	.	.	.	.	.	D	.	K
1447	ACY68733.1	75		.	.	.	.	.	.	.	.	E	N	A	K	.	.	I	.	A	.	R	.	.	.	.	.	.	.	.	V	.	.	.	.	A	V	S	.	.	.	.	.	.	.	.	D	.	R
1448	AGS41023.1	75		.	.	.	.	.	.	.	.	E	N	A	K	.	.	I	.	A	.	R	.	.	.	.	.	.	.	.	V	.	.	.	.	A	V	S	.	.	.	.	.	.	.	.	D	.	R
1449	AKC42194.1	75		.	.	.	.	.	.	.	.	E	N	A	K	.	.	I	.	A	.	R	.	.	.	.	.	.	.	.	V	.	.	.	.	A	V	S	.	.	R	.	.	.	.	.	D	.	R
1450	AGS40971.1	75		.	.	.	.	.	.	.	.	E	N	A	K	.	.	I	.	A	.	R	.	.	.	.	.	.	.	.	V	.	.	.	.	A	V	S	.	.	K	.	.	.	.	.	D	.	R
1451	AGG39607.1	68		.	.	.	.	.	.	.	.	E	N	A	K	.	.	I	.	A	.	R	.	.	.	.	.	.	.	.	V	.	.	.	.	D	V	S	.	.	K	.	.	.	.	.	D	.	R
1452	ACB55347.1	75		.	.	.	.	.	.	.	.	E	N	A	K	.	.	I	.	A	.	R	.	.	.	.	.	.	.	.	V	.	.	.	.	A	V	S	.	.	.	.	.	.	.	.	D	.	R
1453	AKC42200.1	75		.	.	.	.	.	.	.	.	E	N	A	K	.	.	I	.	A	.	R	.	.	.	.	.	.	.	.	V	.	.	.	.	A	V	S	.	.	R	.	.	.	.	.	D	.	R
1454	AKQ33091.1	75		.	.	.	.	.	.	.	.	G	N	S	N	.	.	I	.	A	.	.	.	.	.	.	.	.	.	.	V	.	.	.	.	Q	V	S	.	.	Q	.	.	.	.	.	.	.	N
1455	ACB55385.1	75		.	.	.	.	.	.	.	.	E	N	A	K	.	.	I	.	A	.	R	.	.	.	.	.	.	.	.	V	.	.	.	.	A	V	S	.	.	.	.	.	.	.	.	D	.	R
1456	ACB55341.1	75		.	.	.	.	.	.	.	.	E	N	A	K	.	.	I	.	A	.	R	.	.	.	.	.	.	.	.	V	.	.	.	.	A	V	S	.	.	.	.	.	.	.	.	D	.	R
1457	ABM63520.1	68		.	.	.	.	.	.	.	.	E	N	A	K	.	.	I	.	A	.	R	.	.	.	.	.	.	.	.	V	.	.	.	.	A	V	S	.	.	K	.	.	.	.	.	D	.	R
1458	ACY68737.1	75		.	.	.	.	.	.	.	.	E	N	A	K	.	.	I	.	A	.	R	.	.	.	.	.	.	.	.	V	.	.	.	.	D	V	S	.	.	.	.	.	.	.	.	D	.	K
1459	APT35530.1	26		.	.	.	.	.	.	.	.	E	N	A	K	.	.	I	.	A	.	R	.	.	.	.	.	.	.	.	V	.	.	.	.	A	V	S	.	.	K	.	.	.	.	.	D	.	R
1460	ACB55320.1	75		.	.	.	.	.	.	.	.	E	N	A	K	.	.	I	.	A	.	R	.	.	.	.	.	.	.	.	V	.	.	.	.	A	V	S	.	.	.	.	.	.	.	.	D	.	R
1461	APT35563.1	26		.	.	.	.	.	.	.	.	E	N	A	K	.	.	I	.	A	.	R	.	.	.	.	.	.	.	.	V	.	.	.	.	A	V	S	.	.	.	.	.	.	.	.	D	.	K
1462	AGS40945.1	75		.	.	.	.	.	.	.	.	E	N	A	K	.	.	I	.	A	.	R	.	.	.	.	.	.	.	.	V	.	.	.	.	A	V	S	.	.	K	.	.	.	.	.	D	.	R
1463	ABM63516.1	75		.	.	.	.	.	.	.	.	E	N	A	K	.	.	I	.	A	.	R	.	.	.	.	.	.	.	.	V	.	.	.	.	A	V	S	.	.	R	.	.	.	.	.	D	.	R
1464	ABM63522.1	75		.	.	.	.	.	.	.	.	E	N	A	K	.	.	I	.	A	.	R	.	.	.	.	.	.	.	.	V	.	.	.	.	A	V	S	.	.	K	.	.	.	.	.	D	.	R
1465	APT35527.1	26		.	.	.	.	.	.	.	.	E	N	A	K	.	.	I	.	A	.	R	.	.	.	.	.	.	.	.	V	.	.	.	.	A	V	S	.	.	.	.	.	.	.	.	D	.	K
1466	AGS41027.1	75		.	.	.	.	.	.	.	.	E	N	A	K	.	.	I	.	A	.	R	.	.	.	.	.	.	.	.	V	.	.	.	.	A	V	S	.	.	K	.	.	.	.	.	D	.	R
1467	ABM63518.1	75		.	.	.	.	.	.	.	.	E	N	A	K	.	.	I	.	A	.	R	.	.	.	.	.	.	.	.	V	.	.	.	.	A	V	S	.	.	K	.	.	.	.	.	D	.	R
1468	AGG39609.1	68		.	.	.	.	.	.	.	.	E	N	A	K	.	.	I	.	A	.	R	.	.	.	.	.	.	.	.	V	.	.	.	.	D	V	S	.	.	K	.	.	.	.	.	D	.	R
1469	AGG39602.1	68		.	.	.	.	.	.	.	.	E	N	A	K	.	.	I	.	A	.	R	.	.	.	.	.	.	.	.	V	.	.	.	.	D	V	S	.	.	K	.	.	.	.	.	D	.	R
1470	AGG39605.1	68		.	.	.	.	.	.	.	.	E	N	A	K	.	.	I	.	A	.	R	.	.	.	.	.	.	.	.	V	.	.	.	.	D	V	S	.	.	K	.	.	.	.	.	D	.	R
1471	APT35514.1	26		.	.	.	.	.	.	.	.	E	N	A	K	.	.	I	.	A	.	R	.	.	.	.	.	.	.	.	V	.	.	.	.	A	V	S	.	.	K	.	.	.	.	R	D	.	R
1472	AGG39601.1	68		.	.	.	.	.	.	.	.	E	N	A	K	.	.	I	.	A	.	R	.	.	.	.	.	.	.	.	V	.	.	.	.	D	V	S	.	.	K	.	.	.	.	.	D	.	R
1473	ACB42433.1	75		.	.	.	.	.	.	.	.	E	N	A	K	.	.	I	.	A	.	R	.	.	.	.	.	.	.	.	V	.	.	.	.	A	V	S	.	.	K	.	.	.	.	.	D	.	R
1474	ABN11196.1	75		.	.	.	.	.	.	.	.	E	N	A	K	.	.	I	.	A	.	R	.	.	.	.	.	.	.	.	V	.	.	.	.	D	V	S	.	.	K	.	.	.	.	.	D	.	R
1475	AGG39604.1	68		.	.	.	.	.	.	.	.	E	N	A	K	.	.	I	.	A	.	R	.	.	.	.	.	.	.	.	V	.	.	.	.	D	V	S	.	.	K	.	.	.	.	.	D	.	R
1476	UFQ05846.1	75		.	.	.	.	.	.	.	.	E	N	A	K	.	.	I	.	A	.	R	.	.	.	.	.	.	.	.	V	.	.	.	.	A	V	S	.	.	K	.	.	.	.	.	D	.	R
1477	XP_001615447.1	75		.	.	.	.	.	.	.	.	E	N	A	K	.	.	I	.	A	.	R	.	.	.	.	.	.	.	.	V	.	.	.	.	D	V	S	.	.	R	.	.	.	.	.	D	.	K
1478	XP_012333145.1	75		.	.	.	.	.	.	.	.	G	N	S	S	.	.	I	.	A	.	.	.	.	.	.	.	.	.	.	V	.	Q	.	.	K	V	S	.	.	.	.	.	.	.	.	.	.	K
1479	AZL41038.1	75		.	.	.	.	.	.	.	.	E	N	A	K	.	.	I	.	A	.	R	.	.	.	.	.	.	.	.	V	.	.	.	.	A	V	S	.	.	.	.	.	.	.	.	D	.	R
1480	APT35522.1	26		.	.	.	.	.	.	.	.	E	N	A	K	.	.	I	.	A	.	R	.	.	.	.	.	.	.	.	V	.	.	.	.	D	V	S	.	.	K	.	.	.	.	.	D	.	R
1481	AKC42213.1	75		.	.	.	.	.	.	.	.	E	N	A	K	.	.	I	.	A	.	R	.	.	.	L	.	.	.	.	V	.	.	.	.	A	V	S	.	.	.	.	.	.	.	.	D	.	R
1482	ABN11202.1	75		.	.	.	.	.	.	.	.	E	N	A	K	.	.	I	.	A	.	R	.	.	.	.	.	.	.	.	V	.	.	.	.	D	V	S	.	.	K	.	.	.	.	.	D	.	R
1483	ABN11192.1	75		.	.	.	.	.	.	.	.	E	N	A	K	.	.	I	.	A	.	R	.	.	.	.	.	.	.	.	V	.	.	.	.	D	V	S	.	.	K	.	.	.	.	.	D	.	R
1484	ACY68762.1	75		.	.	.	.	.	.	.	.	E	N	A	K	.	.	I	.	A	.	R	.	.	.	.	.	.	.	.	V	.	.	.	.	A	V	S	.	.	K	.	.	.	.	.	D	.	R
1485	APT35531.1	26		.	.	.	.	.	.	.	.	E	N	A	K	.	.	I	.	A	.	R	.	.	.	.	.	.	.	.	V	.	.	.	.	D	V	S	.	.	K	.	.	.	.	.	D	.	R
1486	AGG39616.1	68		.	.	.	.	.	.	.	.	E	N	A	K	.	.	I	.	A	.	R	.	.	.	.	.	.	.	.	V	.	.	.	.	D	V	S	.	.	K	.	.	.	.	.	D	.	R
1487	ABM63525.1	75		.	.	.	.	.	.	.	.	E	N	A	K	.	.	I	.	A	.	R	.	.	.	.	.	.	.	.	V	.	.	.	.	D	V	S	.	.	K	.	.	.	.	.	D	.	R
1488	QEQ12009.1	33		.	.	.	.	.	.	.	.	E	N	A	K	.	.	I	.	A	.	R	.	.	.	.	.	.	.	.	V	.	.	.	.	D	V	S	.	.	K	.	.	.	.	.	D	.	R
1489	AKQ33094.1	75		.	.	.	.	.	.	.	.	G	N	S	N	.	.	I	.	A	.	.	.	.	.	.	.	.	.	.	V	.	.	.	.	Q	V	S	.	.	Q	.	.	.	.	.	.	.	N
1490	UFQ05801.1	75		.	.	.	.	.	.	.	.	E	N	A	K	.	.	I	.	A	.	R	.	.	.	.	.	.	.	.	V	.	.	.	.	A	V	S	.	.	.	.	.	.	.	.	D	.	K
1491	ACY68790.1	75		.	.	.	.	.	.	.	.	E	N	A	K	.	.	I	.	A	.	R	.	.	.	.	.	.	.	.	V	.	.	.	.	A	V	S	.	.	.	.	.	.	.	.	D	.	K
1492	AZL41029.1	75		.	.	.	.	.	.	.	.	E	N	A	K	.	.	I	.	A	.	R	.	.	.	.	.	.	.	.	V	.	.	.	.	A	V	S	.	.	.	.	.	.	.	.	D	.	R
1493	AZL41030.1	75		.	.	.	.	.	.	.	.	E	N	A	K	.	.	I	.	A	.	R	.	.	.	.	.	.	.	.	V	.	.	.	.	A	V	S	.	.	.	.	.	.	.	.	D	.	R
1494	ACY68739.1	75		.	.	.	.	.	.	.	.	E	N	A	K	.	.	I	.	A	.	R	.	.	.	.	.	.	.	.	V	.	.	.	.	A	V	S	.	.	.	.	.	.	.	.	D	.	K
1495	AZL41037.1	75		.	.	.	.	.	.	.	.	E	N	A	K	.	.	I	.	A	.	R	.	.	.	.	.	.	.	.	V	.	.	.	.	A	V	S	.	.	.	.	.	.	.	.	D	.	R
1496	AZL41036.1	75		.	.	.	.	.	.	.	.	E	N	A	K	.	.	I	.	A	.	R	.	.	.	.	.	.	.	.	V	.	.	.	.	A	V	S	.	.	.	.	.	.	.	.	D	.	R
1497	QEQ12052.1	33		.	.	.	.	.	.	.	.	E	N	A	K	.	.	I	.	A	.	R	.	.	.	.	.	.	.	.	V	.	.	.	.	D	V	S	.	.	K	.	.	.	.	.	D	.	R
1498	ACY68809.1	75		.	.	.	.	.	.	.	.	E	N	A	K	.	.	I	.	A	.	R	.	.	.	.	.	.	.	.	V	.	.	.	.	A	V	S	.	.	.	.	.	.	.	.	D	.	K
1499	ACY68777.1	75		.	.	.	.	.	.	.	.	E	N	A	K	.	.	I	.	A	.	R	.	.	.	.	.	.	.	.	V	.	.	.	.	A	V	S	.	.	.	.	.	.	.	.	D	.	K
1500	ABM63523.1	75		.	.	.	.	.	.	.	.	E	N	A	K	.	.	I	.	A	.	R	.	.	.	.	.	.	.	.	V	.	.	.	.	A	V	S	.	.	.	.	.	.	.	.	D	.	R
1501	ACY68763.1	75		.	.	.	.	.	.	.	.	E	N	A	K	.	.	I	.	A	.	R	.	.	.	.	.	.	.	.	V	.	.	.	.	A	V	S	.	.	K	.	.	.	.	.	D	.	R
1502	AGG39597.1	68		.	.	.	.	.	.	.	.	E	N	A	K	.	.	I	.	A	.	R	.	.	.	.	.	.	.	.	V	.	.	.	.	A	V	S	.	.	R	.	.	.	.	.	D	.	R
1503	ACY68787.1	75		.	.	.	.	.	.	.	.	E	N	A	K	.	.	I	.	A	.	R	.	.	.	.	.	.	.	.	V	.	.	.	.	D	V	S	.	.	K	.	.	.	.	.	D	.	R
1504	ACY68748.1	75		.	.	.	.	.	.	.	.	E	N	A	K	.	.	I	.	A	.	R	.	.	.	.	.	.	.	.	V	.	.	.	.	D	V	S	.	.	K	.	.	.	.	.	D	.	R
1505	ACY68770.1	75		.	.	.	.	.	.	.	.	E	N	A	K	.	.	I	.	A	.	R	.	.	.	.	.	.	.	.	V	.	.	.	.	D	V	S	.	.	K	.	.	.	.	.	D	.	R
1506	QEQ11979.1	33		.	.	.	.	.	.	.	.	E	N	A	K	.	.	I	.	A	.	R	.	.	.	.	.	.	.	.	V	.	.	.	.	D	V	S	.	.	K	.	.	.	.	.	D	.	R
1507	SCO72819.1	75		.	.	.	.	.	.	.	.	E	N	A	K	.	.	I	.	A	.	R	.	.	.	.	.	.	.	.	V	.	.	.	.	D	V	S	.	.	K	.	.	.	.	.	D	.	R
1508	ACY68833.1	75		.	.	.	.	.	.	.	.	E	N	A	K	.	.	I	.	A	.	R	.	.	.	.	.	.	.	.	V	.	.	.	.	D	V	S	.	.	K	.	.	.	.	.	D	.	R
1509	UFQ05856.1	75		.	.	.	.	.	.	.	.	E	N	A	K	.	.	I	.	A	.	R	.	.	.	.	.	.	.	.	V	.	.	.	.	D	V	S	.	.	K	.	.	.	.	.	D	.	R
1510	UFQ05872.1	75		.	.	.	.	.	.	.	.	E	N	A	K	.	.	I	.	A	.	R	.	.	.	.	.	.	.	.	V	.	.	.	.	D	V	S	.	.	K	.	.	.	.	.	D	.	R
1511	UFQ05811.1	75		.	.	.	.	.	.	.	.	E	N	A	K	.	.	I	.	A	.	R	.	.	.	.	.	.	.	.	V	.	.	.	.	D	V	S	.	.	K	.	.	.	.	.	D	.	R
1512	UFQ05821.1	75		.	.	.	.	.	.	.	.	E	N	A	K	.	.	I	.	A	.	R	.	.	.	.	.	.	.	.	V	.	.	.	.	D	V	S	.	.	K	.	.	.	.	.	D	.	R
1513	ACY68792.1	75		.	.	.	.	.	.	.	.	E	N	A	K	.	.	I	.	A	.	R	.	.	.	.	.	.	.	.	V	.	.	.	.	D	V	S	.	.	K	.	.	.	.	.	D	.	R
1514	ABM63519.1	75		.	.	.	.	.	.	.	.	E	N	A	K	.	.	I	.	A	.	R	.	.	.	.	.	.	.	.	V	.	.	.	.	A	V	S	.	.	.	.	.	.	.	.	D	.	R
1515	ACY68730.1	75		.	.	.	.	.	.	.	.	E	N	A	K	.	.	I	.	A	.	R	.	.	.	.	.	.	.	.	V	.	.	.	.	D	V	S	.	.	K	.	.	.	.	.	D	.	R
1516	ANS58330.1	75		.	.	.	.	.	.	.	.	E	N	A	K	.	G	I	.	A	.	R	.	.	.	.	.	.	.	.	V	.	.	.	.	A	V	S	.	.	.	.	.	.	.	.	D	.	R
1517	ACB55360.1	75		.	.	.	.	.	.	.	.	E	N	A	K	.	.	I	.	A	.	R	.	.	.	.	.	.	.	.	V	.	.	.	.	D	V	S	.	.	S	.	.	.	.	.	D	.	K
1518	AKC42198.1	75		.	.	.	.	.	.	.	.	E	N	A	R	.	G	I	.	A	.	R	.	.	.	.	.	.	.	.	V	.	.	.	.	A	V	S	.	.	.	.	.	.	.	.	D	.	R
1519	ACY68789.1	75		.	.	.	.	.	.	.	.	E	N	A	K	.	.	I	.	A	.	R	.	.	.	.	.	.	.	.	V	.	.	.	.	A	V	S	.	.	.	.	.	.	.	.	D	.	K
1520	ACY68746.1	75		.	.	.	.	.	.	.	.	E	N	A	K	.	.	I	.	A	.	R	.	.	.	.	.	.	.	.	V	.	.	.	.	A	V	S	.	.	.	.	.	.	.	.	D	.	K
1521	ACY68727.1	75		.	.	.	.	.	.	.	.	E	N	A	K	.	.	I	.	A	.	R	.	.	.	.	.	.	.	.	V	.	.	.	.	D	V	S	.	.	K	.	.	.	.	.	D	.	R
1522	UFQ05883.1	75		.	.	.	.	.	.	.	.	E	N	A	K	.	.	I	.	A	.	R	.	.	.	.	.	.	.	.	V	.	.	.	.	A	V	S	.	.	K	.	.	.	.	.	D	.	R
1523	UFQ05862.1	75		.	.	.	.	.	.	.	.	E	N	A	K	.	.	I	.	A	.	R	.	.	.	.	.	.	.	.	V	.	.	.	.	D	V	S	.	.	K	.	.	.	.	.	D	.	R
1524	ACY68829.1	75		.	.	.	.	.	.	.	.	E	N	A	K	.	.	I	.	A	.	R	.	.	.	.	.	.	.	.	V	.	.	.	.	A	V	S	.	.	.	.	.	.	.	.	D	.	K
1525	ACY68800.1	75		.	.	.	.	.	.	.	.	E	N	A	K	.	.	I	.	A	.	R	.	.	.	.	.	.	.	.	V	.	.	.	.	A	V	S	.	.	K	.	.	.	.	.	D	.	R
1526	APT35523.1	26		.	.	.	.	.	.	.	.	E	N	A	K	.	.	I	.	A	.	R	.	.	.	.	.	.	.	.	V	.	.	.	.	A	V	S	.	.	K	.	.	.	.	R	D	.	R
1527	ABM63526.1	69		.	.	.	.	.	.	.	.	E	N	A	K	.	.	I	.	A	.	R	.	.	.	.	.	.	.	.	V	.	.	.	.	D	V	S	.	.	K	.	.	.	.	.	D	.	R
1528	ACY68760.1	75		.	.	.	.	.	.	.	.	E	N	A	K	.	.	I	.	A	.	R	.	.	.	.	.	.	.	.	V	.	.	.	.	A	V	S	.	.	K	.	.	.	.	.	D	.	R
1529	ABN11205.1	75		.	.	.	.	.	.	.	.	E	N	A	K	.	.	I	.	A	.	R	.	.	.	.	.	.	.	.	V	.	.	.	.	A	V	S	.	.	K	.	.	.	.	.	D	.	R
1530	ACY68735.1	75		.	.	.	.	.	.	.	.	E	N	A	K	.	.	I	.	A	.	R	.	.	.	.	.	.	.	.	V	.	.	.	.	A	V	S	.	.	K	.	.	.	.	.	D	.	R
1531	ACB55334.1	75		.	.	.	.	.	.	.	.	E	N	A	K	.	.	I	.	A	.	R	.	.	.	.	.	.	.	.	V	.	.	.	.	D	V	S	.	.	K	.	.	.	.	.	D	.	R
1532	UFQ05834.1	75		.	.	.	.	.	.	.	.	E	N	A	K	.	.	I	.	A	.	R	.	.	.	.	.	.	.	.	V	.	.	.	.	A	V	S	.	.	.	.	.	.	.	.	D	.	R
1533	ACY68804.1	75		.	.	.	.	.	.	.	.	E	N	A	K	.	.	I	.	A	.	R	.	.	.	.	.	.	.	.	V	.	.	.	.	A	V	S	.	.	K	.	.	.	.	.	D	.	R
1534	P22622.1	75		.	.	.	.	.	.	.	.	G	N	S	S	.	.	I	.	A	.	.	.	.	.	.	.	.	.	.	V	.	Q	.	.	E	V	S	.	.	.	.	.	.	.	.	.	.	K
1535	AGS41003.1	75		.	.	.	.	.	.	.	.	E	N	A	K	.	.	I	.	A	.	R	.	.	.	.	.	.	.	.	V	.	.	.	.	D	V	S	.	.	K	.	.	.	.	.	D	.	S
1536	QEQ11973.1	33		.	.	.	.	.	.	.	.	E	N	A	K	.	.	I	.	A	.	R	.	.	.	.	.	.	.	.	V	.	.	.	.	D	V	S	.	.	K	.	.	.	.	.	D	.	R
1537	UFQ05889.1	75		.	.	.	.	.	.	.	.	E	N	A	K	.	.	I	.	A	.	R	.	.	.	.	.	.	.	.	V	.	.	.	.	A	V	S	.	.	.	.	.	.	.	.	D	.	R
1538	APT35535.1	26		.	.	.	.	.	.	.	.	E	N	A	K	.	.	I	.	A	.	R	.	.	.	.	.	.	.	.	V	.	.	.	.	D	V	S	.	.	K	.	.	.	.	.	D	.	R
1539	AGS40932.1	75		.	.	.	.	.	.	.	.	E	N	A	K	.	.	I	.	A	.	R	.	.	.	.	.	.	.	.	V	.	.	.	.	D	V	S	.	.	K	.	.	.	.	.	D	.	R
1540	ACY68889.1	75		.	.	.	.	.	.	.	.	E	N	A	K	.	.	I	.	A	.	R	.	.	.	.	.	.	.	.	V	.	.	.	.	A	V	S	.	.	K	.	.	.	.	.	D	.	R
1541	ABN11188.1	75		.	.	.	.	.	.	.	.	E	N	A	K	.	.	I	.	A	.	R	.	.	.	.	.	.	.	.	V	.	.	.	.	D	V	S	.	.	K	.	.	.	.	.	D	.	R
1542	ACY68734.1	75		.	.	.	.	.	.	.	.	E	N	A	K	.	.	I	.	A	.	R	.	.	.	.	.	.	.	.	V	.	.	.	.	D	V	S	.	.	K	.	.	.	.	.	D	.	R
1543	ACB55369.1	75		.	.	.	.	.	.	.	.	E	N	A	K	.	.	I	.	A	.	R	.	.	.	.	.	.	.	.	V	.	.	.	.	D	V	S	.	.	R	.	.	.	.	.	D	.	K
1544	ACB55367.1	75		.	.	.	.	.	.	.	.	E	N	A	K	.	.	I	.	A	.	R	.	.	.	.	.	.	.	.	V	.	.	.	.	D	V	S	.	.	R	.	.	.	.	.	D	.	K
1545	AKQ33100.1	75		.	.	.	.	.	.	.	.	G	N	S	N	.	.	I	.	A	.	.	.	.	.	.	.	.	.	.	V	.	.	.	.	Q	V	S	.	.	Q	.	.	.	.	.	.	.	N
1546	ACB55319.1	75		.	.	.	.	.	.	.	.	E	N	A	K	.	.	I	.	A	.	R	.	.	.	.	.	.	.	.	V	.	.	.	.	D	V	S	.	.	R	.	.	.	.	.	D	.	K
1547	UFQ05871.1	75		.	.	.	.	.	.	.	.	E	N	A	K	.	.	I	.	A	.	R	.	.	.	.	.	.	.	.	V	.	.	.	.	A	V	S	.	.	.	.	.	.	.	.	D	.	R
1548	UFQ05859.1	75		.	.	.	.	.	.	.	.	E	N	A	K	.	.	I	.	A	.	R	.	.	.	.	.	.	.	.	V	.	.	.	.	A	V	S	.	.	K	.	.	.	.	.	D	.	R
1549	ANS58334.1	75		.	.	.	.	.	.	.	.	E	N	A	K	.	.	I	.	A	.	R	.	.	.	.	.	.	.	.	V	.	G	.	.	A	V	S	.	.	R	.	.	.	.	.	D	.	R
1550	ACB55327.1	75		.	.	.	.	.	.	.	.	E	N	A	K	.	.	I	.	A	.	R	.	.	.	.	.	.	.	.	V	.	.	.	.	A	V	S	.	.	K	.	.	.	.	.	D	.	R
1551	AGG39620.1	68		.	.	.	.	.	.	.	.	E	N	A	K	.	.	I	.	A	.	R	.	.	.	.	.	.	.	.	V	.	.	.	.	D	V	S	.	.	R	.	.	.	.	.	D	.	K
1552	ACY68796.1	75		.	.	.	.	.	.	.	.	E	N	A	K	.	.	I	.	A	.	R	.	.	.	.	.	.	.	.	V	.	.	.	.	A	V	S	.	.	K	.	.	.	.	.	D	.	R
1553	UFQ05806.1	75		.	.	.	.	.	.	.	.	E	N	A	K	.	.	I	.	A	.	R	.	.	.	.	.	.	.	.	V	.	.	.	.	.	V	S	.	.	K	.	.	.	.	.	D	.	R
1554	ACB55322.1	75		.	.	.	.	.	.	.	.	E	N	A	K	.	.	I	.	A	.	R	.	.	.	.	.	.	.	.	V	.	.	.	.	A	V	S	.	.	K	.	.	.	.	.	D	.	R
1555	UFQ05814.1	75		.	.	.	.	.	.	.	.	E	N	A	K	.	.	I	.	A	.	R	.	.	.	.	.	.	.	.	V	.	.	.	.	D	V	S	.	.	K	.	.	.	.	.	D	.	R
1556	ACY68776.1	75		.	.	.	.	.	.	.	.	E	N	A	K	.	.	I	.	A	.	R	.	.	.	.	.	.	.	.	V	.	.	.	.	A	V	S	.	.	K	.	.	.	.	.	D	.	R
1557	UFQ05923.1	75		.	.	.	.	.	.	.	.	E	N	A	K	.	.	I	.	A	.	R	.	.	.	.	.	.	.	.	V	.	.	.	.	D	V	S	.	.	K	.	.	.	.	.	D	.	R
1558	ACY68783.1	75		.	.	.	.	.	.	.	.	E	N	A	K	.	.	I	.	A	.	R	.	.	.	.	.	.	.	.	V	.	.	.	.	.	V	S	.	.	K	.	.	.	.	.	D	.	R
1559	UFQ05800.1	75		.	.	.	.	.	.	.	.	E	N	A	K	.	.	I	.	A	.	R	.	.	.	.	.	.	.	.	V	.	.	.	.	A	V	S	.	.	K	.	.	.	.	.	D	.	R
1560	UFQ05828.1	75		.	.	.	.	.	.	.	.	E	N	A	K	.	.	I	.	A	.	R	.	.	.	.	.	.	.	.	V	.	.	.	.	A	V	S	.	.	K	.	.	.	.	.	D	.	R
1561	AKQ33111.1	70		.	.	.	.	.	.	.	.	G	N	S	K	.	.	I	.	A	.	.	.	.	.	.	.	.	.	.	V	.	.	.	.	.	V	S	.	.	.	.	.	.	.	.	A	.	K
1562	AKC42181.1	75		.	.	.	.	.	.	.	.	E	N	A	K	.	.	I	.	A	.	R	.	.	.	.	.	.	.	.	V	.	.	.	.	A	V	S	.	.	R	.	.	.	.	.	D	.	R
1563	UFQ05812.1	75		.	.	.	.	.	.	.	.	E	N	A	K	.	.	I	.	A	.	R	.	.	.	.	.	.	.	.	V	.	.	.	.	D	V	S	.	.	K	.	.	.	.	.	D	.	R
1564	UFQ05890.1	75		.	.	.	.	.	.	.	.	E	N	A	K	.	.	I	.	A	.	R	.	.	.	.	.	.	.	.	V	.	.	.	.	A	V	S	.	.	K	.	.	.	.	.	D	.	R
1565	ACY68785.1	75		.	.	.	.	.	.	.	.	E	N	A	K	.	.	I	.	A	.	R	.	.	.	.	.	.	.	.	V	.	.	.	.	A	V	S	.	.	K	.	.	.	.	.	D	.	R
1566	UFQ05825.1	75		.	.	.	.	.	.	.	.	E	N	A	K	.	.	I	.	A	.	R	.	.	.	.	.	.	.	.	V	.	.	.	.	D	V	S	.	.	K	.	.	.	.	.	D	.	R
1567	ACY68875.1	75		.	.	.	.	.	.	.	.	E	N	A	K	.	.	I	.	A	.	R	.	.	.	.	.	.	.	.	V	.	.	.	.	A	V	S	.	.	K	.	.	.	.	.	D	.	R
1568	UFQ05842.1	75		.	.	.	.	.	.	.	.	E	N	A	K	.	.	I	.	A	.	R	.	.	.	.	.	.	.	.	V	.	.	.	.	D	V	S	.	.	K	.	.	.	.	.	D	.	R
1569	ACY68786.1	75		.	.	.	.	.	.	.	.	E	N	A	K	.	.	I	.	A	.	R	.	.	.	.	.	.	.	.	V	.	.	.	.	A	V	S	.	.	K	.	.	.	.	.	D	.	R
1570	UFQ05875.1	75		.	.	.	.	.	.	.	.	E	N	A	K	.	.	I	.	A	.	R	.	.	.	.	.	.	.	.	V	.	.	.	.	D	V	S	.	.	K	.	.	.	.	.	D	.	R
1571	ANS58322.1	75		.	.	.	.	.	.	.	.	E	N	A	K	.	.	I	.	A	.	R	.	.	A	.	.	.	.	.	V	.	.	.	.	A	V	S	.	.	R	.	.	.	.	.	D	.	R
1572	ACY68769.1	75		.	.	.	.	.	.	.	.	E	N	A	K	.	.	I	.	A	.	R	.	.	.	.	.	.	.	.	V	.	.	.	.	D	V	S	.	.	K	.	.	.	.	.	D	.	R
1573	AKC42168.1	75		.	.	.	.	.	.	.	.	E	N	A	K	.	.	I	.	A	.	R	.	.	A	.	.	.	.	.	V	.	.	.	.	A	V	S	.	.	R	.	.	.	.	.	D	.	R
1574	ANS58331.1	75		.	.	.	.	.	.	.	.	E	N	A	K	.	.	I	.	A	.	R	.	.	.	.	.	.	.	.	V	.	.	.	.	A	V	S	.	.	R	.	.	.	.	.	D	.	R
1575	AKQ33092.1	75		.	.	.	.	.	.	.	.	G	N	S	N	.	.	I	.	A	.	.	.	.	.	.	.	.	.	.	V	.	.	.	.	K	V	S	.	.	Q	.	.	.	.	.	.	.	N
1576	ACY68742.1	75		.	.	.	.	.	.	.	.	E	N	A	K	.	.	I	.	A	.	R	.	.	.	.	.	.	.	.	V	.	.	.	.	A	V	S	.	.	K	.	.	.	.	.	D	.	R
1577	AKC42189.1	75		.	.	.	.	.	.	.	.	E	N	A	K	.	.	I	.	A	.	R	.	.	.	.	.	.	.	.	V	.	.	.	.	A	V	S	.	.	R	.	.	.	.	.	D	.	R
1578	ACY68767.1	75		.	.	.	.	.	.	.	.	E	N	A	K	.	.	I	.	A	.	R	.	.	.	.	.	.	.	.	V	.	.	.	.	A	V	S	.	.	K	.	.	.	.	.	D	.	R
1579	ACY68880.1	75		.	.	.	.	.	.	.	.	E	N	A	K	.	.	I	.	A	.	R	.	.	.	.	.	.	.	.	V	.	.	.	.	A	V	S	.	.	K	.	.	.	.	.	D	.	R
1580	ACY68872.1	75		.	.	.	.	.	.	.	.	E	N	A	K	.	.	I	.	A	.	R	.	.	.	.	.	.	.	.	V	.	.	.	.	A	V	S	.	.	K	.	.	.	.	.	D	.	R
1581	ACY68834.1	75		.	.	.	.	.	.	.	.	E	N	A	K	.	.	I	.	A	.	R	.	.	.	.	.	.	.	.	V	.	.	.	.	A	V	S	.	.	K	.	.	.	.	.	D	.	R
1582	ACY68825.1	75		.	.	.	.	.	.	.	.	E	N	A	K	.	.	I	.	A	.	R	.	.	.	.	.	.	.	.	V	.	.	.	.	D	V	S	.	.	K	.	.	.	.	.	D	.	R
1583	ACY68775.1	75		.	.	.	.	.	.	.	.	E	N	A	K	.	.	I	.	A	.	R	.	.	.	.	.	.	.	.	V	.	.	.	.	D	V	S	.	.	K	.	.	.	.	.	D	.	R
1584	UFQ05870.1	75		.	.	.	.	.	.	.	.	E	N	A	K	.	.	I	.	A	.	R	.	.	.	.	.	.	.	.	V	.	.	.	.	D	V	S	.	.	K	.	.	.	.	.	D	.	R
1585	ACY68752.1	75		.	.	.	.	.	.	.	.	E	N	A	K	.	.	I	.	A	.	R	.	.	.	.	.	.	.	.	V	.	.	.	.	A	V	S	.	.	K	.	.	.	.	.	D	.	R
1586	ABN11184.1	75		.	.	.	.	.	.	.	.	E	N	A	K	.	.	I	.	A	.	R	.	.	.	.	.	.	.	.	V	.	.	.	.	D	V	S	.	.	K	.	.	.	.	.	D	.	R
1587	KMZ93134.1	75		.	.	.	.	.	.	.	.	E	N	A	K	.	.	I	.	A	.	R	.	.	.	.	.	.	.	.	V	.	.	.	.	D	V	S	.	.	K	.	.	.	.	.	D	.	R
1588	UFQ05863.1	75		.	.	.	.	.	.	.	.	E	N	A	K	.	.	I	.	A	.	R	.	.	.	.	.	.	.	.	D	.	.	.	.	A	V	S	.	.	.	.	.	.	.	.	D	.	R
1589	AKC42172.1	75		.	.	.	.	.	.	.	.	E	N	A	K	.	.	I	L	A	.	R	.	.	.	.	.	.	.	.	V	.	.	.	.	A	V	S	.	.	R	.	.	.	.	.	D	.	R
1590	AZL41040.1	75		.	.	.	.	.	.	.	.	E	N	A	K	.	.	I	.	A	.	R	.	.	.	.	.	.	.	.	V	.	.	.	.	D	V	S	.	.	R	.	.	.	.	.	D	.	K
1591	UFQ05851.1	75		.	.	.	.	.	.	.	.	E	N	A	K	.	.	I	.	A	.	R	.	.	.	.	.	.	.	.	V	.	.	.	.	D	V	S	.	.	K	.	.	.	.	.	D	.	R
1592	ACY68755.1	75		.	.	.	.	.	.	.	.	E	N	A	K	.	.	I	.	A	.	R	.	.	.	.	.	.	.	.	V	.	.	.	.	A	V	S	.	.	.	.	.	.	.	.	D	.	K
1593	AGS40940.1	75		.	.	.	.	.	.	.	.	E	N	A	K	.	.	I	.	A	.	R	.	.	.	.	.	.	.	.	V	.	.	.	.	A	V	S	.	.	K	.	.	.	.	.	D	.	R
1594	UFQ05796.1	75		.	.	.	.	.	.	.	.	E	N	A	K	.	.	I	.	A	.	R	.	.	.	.	.	.	.	.	V	.	.	.	.	A	V	S	.	.	K	.	.	.	.	.	D	.	R
1595	ACB42435.1	75		.	.	.	.	.	.	.	.	E	N	A	K	.	.	I	.	A	.	R	.	.	.	.	.	.	.	.	V	.	.	.	.	A	V	S	.	.	K	.	.	.	.	.	D	.	R
1596	UFQ05803.1	75		.	.	.	.	.	.	.	.	E	N	A	K	.	.	I	.	A	.	R	.	.	.	.	.	.	.	.	V	.	.	.	.	A	V	S	.	.	K	.	.	.	.	.	D	.	R
1597	AGS41014.1	75		.	.	.	.	.	.	.	.	E	N	A	K	.	.	I	.	A	.	R	.	.	.	.	.	.	.	.	V	.	.	.	.	A	V	S	.	.	K	.	.	.	.	.	D	.	R
1598	UFQ05815.1	75		.	.	.	.	.	.	.	.	E	N	A	K	.	.	I	.	A	.	R	.	.	.	.	.	.	.	.	V	.	.	.	.	A	V	S	.	.	.	.	.	.	.	.	D	.	K
1599	UFQ05799.1	75		.	.	.	.	.	.	.	.	E	N	A	K	.	.	I	.	A	.	R	.	.	.	.	.	.	.	.	V	.	.	.	.	A	V	S	.	.	R	.	.	.	.	.	D	.	R
1600	UFQ05858.1	75		.	.	.	.	.	.	.	.	E	N	A	K	.	.	I	.	A	.	R	.	.	.	.	.	.	.	.	V	.	.	.	.	A	V	S	.	.	.	.	.	.	.	.	D	.	K
1601	ACY68747.1	75		.	.	.	.	.	.	.	.	E	N	A	K	.	.	I	.	A	.	R	.	.	.	.	.	.	.	.	V	.	.	.	.	A	V	S	.	.	.	.	.	.	.	.	D	.	K
1602	ACY68765.1	75		.	.	.	.	.	.	.	.	E	N	A	K	.	.	I	.	A	.	R	.	.	.	.	.	.	.	.	V	.	.	.	.	A	V	S	.	.	.	.	.	.	.	.	D	.	K
1603	UFQ05802.1	75		.	.	.	.	.	.	.	.	E	N	A	K	.	.	I	.	A	.	R	.	.	.	.	.	.	.	.	V	.	.	.	.	A	V	S	.	.	.	.	.	.	.	.	D	.	K
1604	ABN11203.1	75		.	.	.	.	.	.	.	.	E	N	A	K	.	.	I	.	A	.	R	.	.	.	.	.	.	.	.	V	.	.	.	.	A	V	S	.	.	K	.	.	.	.	.	D	.	R
1605	UFQ05869.1	75		.	.	.	.	.	.	.	.	E	N	A	K	.	.	I	.	A	.	R	.	.	.	.	.	.	.	.	V	.	.	.	.	D	V	S	.	.	K	.	.	.	.	.	D	.	R
1606	UFQ05807.1	75		.	.	.	.	.	.	.	.	E	N	A	K	.	.	I	.	A	.	R	.	.	.	.	.	.	.	.	V	.	.	.	.	A	V	S	.	.	R	.	.	.	.	.	D	.	R
1607	UFQ05816.1	75		.	.	.	.	.	.	.	.	E	N	A	K	.	.	I	.	A	.	R	.	.	.	.	.	.	.	.	V	.	.	.	.	A	V	S	.	.	K	.	.	.	.	.	D	.	R
1608	ACY68772.1	75		.	.	.	.	.	.	.	.	E	N	A	K	.	.	I	.	A	.	R	.	.	.	.	.	.	.	.	V	.	.	.	.	.	V	S	.	.	K	.	.	.	.	.	D	.	R
1609	ACY68757.1	75		.	.	.	.	.	.	.	.	E	N	A	K	.	.	I	.	A	.	R	.	.	.	.	.	.	.	.	V	.	.	.	.	V	V	S	.	.	.	.	.	.	.	.	D	.	R
1610	UFQ05817.1	75		.	.	.	.	.	.	.	.	E	N	A	K	.	.	I	.	A	.	R	.	.	.	.	.	.	.	.	V	.	.	.	.	A	V	S	.	.	K	.	.	.	.	.	D	.	R
1611	ACY68841.1	75		.	.	.	.	.	.	.	.	E	N	A	K	.	.	I	.	A	.	R	.	.	.	.	.	.	.	.	V	.	.	.	.	A	V	S	.	.	K	.	.	.	.	.	D	.	R
[truncated: 137 more rows]
[truncated: 105 more columns]

## Sheet: Plasmodium isolates w mutations
	Analysis	Species			137		139		142		170		172		174		229		236		251
[truncated: 597 more rows]

[truncated: 2 more sheets: Pf isolates only, Sheet1]
